# Supplementary material for: Male manipulation impinges on social-dependent tumor suppression in Drosophila melanogaster females
Source: Research Square preprint supplement (doi:10.21203/rs.3.rs-3575658/v1), 2023-12-04
Supplement: Supplementary file 1 [file 202abcd48951adb8bba1f382.xlsx]

## Sheet: Feuil1
ID	baseMean	log2FoldChange	lfcSE	stat	pvalue	padj	Virgin_rep1	Virgin_rep2	Virgin_rep3	Virgin_hetero_rep1	Virgin_hetero_rep2	Virgin_hetero_rep3
FBgn0267429	2531.17518342195	1.81263137128523	0.223367420628619	8.11502127832239	4.85699702460494e-16	4.51603583347768e-12	3154.33694668698	1981.42022321057	2267.59880669156	7051.67193648557	9395.87781595288	9554.93046416226
FBgn0267161	1199.07116315264	1.2275703630649	0.166385651746154	7.37786191406542	1.60851664937965e-13	7.47799390296597e-10	1477.88949292571	1115.3946037	1435.92618233812	3405.58512287316	3342.85745825568	2682.99473837493
FBgn0267431	1288.62365058439	1.63962142582926	0.225785456805743	7.26185578568918	3.818151667648e-13	1.18337247352637e-09	1662.17981585691	791.601542833883	1160.16683133057	3530.40245604163	4002.21730498922	3721.50067824969
FBgn0267428	455.128765258446	1.9298010545799	0.281975965841154	6.84384943526365	7.70929493917783e-12	1.79202560861189e-08	527.902602460994	213.606765526603	316.409135817427	1334.42921232962	1373.2623278476	1316.71740099089
FBgn0263780	3683.81636087906	1.8177455681038	0.268754987203618	6.7635789274735	1.34623978959987e-11	2.50346751273992e-08	5138.72758521715	2243.35431125451	3222.31942830734	11918.5331549896	12681.7685227445	12777.4526919081
FBgn0042201	406.731541327052	0.709334212762456	0.10656754061343	6.65619389055377	2.81009498059847e-11	3.7626794324144e-08	652.744434124067	602.158438565945	638.311485798352	1065.51381973087	1003.58447260178	1023.86323139497
FBgn0284435	93.3002665443785	1.29722355672313	0.194924245572008	6.65501386405987	2.83273349396653e-11	3.7626794324144e-08	73.7161291724812	60.8924263718371	72.5104269581604	176.570861555402	164.839961683384	165.57524204077
FBgn0267430	105.868752838614	1.48628891397282	0.228018550607947	6.51828068378672	7.11178224243098e-11	8.26566891126541e-08	92.7396463782827	60.8924263718371	82.398212452455	198.89591301643	224.230830231074	235.409697867489
FBgn0052373	345.095811806561	1.04379078187311	0.161003438035078	6.48303411785339	8.98961591216265e-11	9.28727208347648e-08	428.029137130536	338.291257621317	408.695133764177	674.825419162887	899.347438007874	847.02436744666
FBgn0260987	1001.63253132605	0.499959628445749	0.0793212691288735	6.30297061477247	2.91994268083395e-10	2.71496270463941e-07	820.389179500194	741.341127415859	798.713339372464	1092.91274652395	1107.82150719568	1134.24672608881
FBgn0260995	1530.53880629645	1.82645792514234	0.290593826766568	6.28526058335549	3.27304215390987e-10	2.766613267914e-07	2197.21623727008	1011.97413351291	1367.81032671075	5154.0425622982	5557.28841410526	5516.92201031083
FBgn0010247	2625.94656912587	1.32066491350315	0.213428167184652	6.18786606718385	6.09841068159865e-10	4.72525187645869e-07	2892.7635851072	1327.06827632591	2263.20423536076	5080.97875751666	5632.43604369621	5474.12024706219
FBgn0260798	1394.2779172324	1.1518838797133	0.187188268897172	6.15361147629432	7.57380959966426e-10	5.41702166597525e-07	1734.70697520403	1044.8367128247	1563.36875093125	3017.9410475044	3365.88657054968	3261.94490442224
FBgn0087011	740.720047527399	1.38008158521824	0.225487602504738	6.12043220952355	9.33218793479716e-10	6.19790595841028e-07	1045.10447649372	578.961323757626	794.318768041666	1968.66362883609	2197.46213626452	2124.31909176117
FBgn0058006	1317.53149104198	1.22100891985709	0.200388587009233	6.09320589600663	1.10671567045293e-09	6.86016153591426e-07	1701.41582009388	1027.43887671846	1379.89539787045	2970.24661938312	3197.41043324093	3406.1192648387
FBgn0050440	240.161005312144	0.874044876287708	0.145101822287893	6.02366574386321	1.70510324632967e-09	9.90878124023331e-07	200.935900486279	150.781246254073	175.782853231904	333.860996849007	306.650811072766	322.139586555512
FBgn0085387	561.417644206472	1.90491085718299	0.317722806914013	5.99551186043288	2.02845489339786e-09	1.10944550581255e-06	719.326744344373	353.756000826863	573.491558669087	1965.61930363686	2102.92157000493	2093.90731261083
FBgn0264815	1056.01779348499	1.40418659957884	0.235434763715194	5.96422795606126	2.45793399905771e-09	1.26965946240214e-06	1567.06222982791	846.69469050364	1208.50711596934	2964.15796898465	3156.20044282009	3462.43737437637
FBgn0003380	1077.66122237119	1.80368201633628	0.303091135902832	5.95095600854036	2.66580737190979e-09	1.30456194442196e-06	1470.75567397354	762.605149323484	1090.9523328705	3381.23052127931	4055.54788082796	4165.28738140658
FBgn0040849	105.816136655768	1.57642375285021	0.267450289492762	5.89426826136552	3.76345345069864e-09	1.7496295092298e-06	121.274922186985	102.453923736742	81.2995696197556	268.915392598745	326.043747741399	314.255051220237
FBgn0263111	1181.28899426967	1.31446491381516	0.224408905117456	5.85745433376257	4.70016001039207e-09	2.08105179888693e-06	1998.65827643453	1078.66583858683	1366.71168387805	3520.25470537753	3881.01145081026	3647.16077365995
FBgn0051176	85.8224072388008	1.38684751999538	0.240080783256631	5.77658695203826	7.62311154787437e-09	3.221804144188e-06	92.7396463782827	62.8255192725304	80.2009267870562	176.570861555402	203.625835020651	234.283335676736
FBgn0264001	791.338432040777	1.70022444923146	0.296383715083989	5.73656500914583	9.66159754361502e-09	3.75177018812796e-06	1275.76462261407	500.67106127955	782.233696881973	2596.8093949441	2896.81991487711	2815.90547688384
FBgn0261549	2211.53093306968	1.62074511362821	0.282548240049471	5.73617132898947	9.68407017800291e-09	3.75177018812796e-06	3049.70760205507	1559.0394244091	2496.11651589304	6184.03925470472	7507.4906078447	8154.86226105561
FBgn0058263	2416.88467594305	1.21534792110702	0.212802678648726	5.71114954390777	1.12215583497251e-08	4.17352198142976e-06	3415.91030826675	1761.04763253154	2523.58258671052	5756.81895174596	5959.6918499794	6158.94845904034
FBgn0285944	1289.23110877391	1.55296095981723	0.277973031836831	5.58673245945965	2.31381762991647e-08	8.27456781652437e-06	1731.14006572794	1280.67404670927	1399.67096885904	3998.21376165681	4587.64158067359	4356.76895383468
FBgn0085434	1087.73019999075	1.308646742706	0.235656381646712	5.55319882942051	2.8048872309897e-08	9.62849554212525e-06	1615.80999266777	899.854745272704	1387.58589769934	2918.49309099619	3358.61421929895	3388.09746978664
FBgn0266348	276.279159424268	1.9552761510798	0.352467268862775	5.54739779778256	2.89952543750814e-08	9.62849554212525e-06	362.635796735593	147.881606903033	293.33763633074	920.400985234194	1117.51797553	1075.67589216963
FBgn0263354	144.11665852487	1.69832959681804	0.311313932477901	5.45536007110313	4.88737061458405e-08	1.56699213704836e-05	215.20353839063	78.2902624780763	179.078781730002	458.678330017481	534.517816929208	536.148402798684
FBgn0087007	531.799984915439	0.880890059896374	0.163103509671818	5.40080383106912	6.63429431017123e-08	2.05618894986574e-05	441.107805209524	324.759607316465	483.402846387736	728.608497682636	746.628061742386	822.244399250082
FBgn0004595	2183.44496329009	1.17326932695163	0.219478247849004	5.34572030918896	9.00581826958563e-08	2.70116446034217e-05	3702.45203617913	2459.86071613215	2875.14829317433	6681.27903724579	7389.92092929111	6307.62826821981
FBgn0264384	140.552844929957	1.47519092921502	0.276671145567607	5.33192908927522	9.71748868586503e-08	2.82353780628666e-05	48.7477628398666	23.1971148083189	19.7755709885892	76.1081299807768	98.1767418849566	77.7189911619941
FBgn0025574	897.326448713588	0.760594294077552	0.142899125754852	5.32259585256229	1.02296849691347e-07	2.88229123766711e-05	801.365662294392	729.742570011699	873.421051996023	1319.20758633346	1413.26025972666	1340.37100699671
FBgn0259481	1922.9361523027	0.637068852019023	0.120186805844766	5.3006554882727	1.15387645736567e-07	3.15551273546647e-05	2668.04828811367	2304.24673762635	3071.80536022752	3839.90885129679	4300.38370626946	4368.03257574222
FBgn0004396	204.761036192774	1.11222160122161	0.212887940904408	5.22444623446766	1.74677071748878e-07	4.6404211803459e-05	196.180021184829	168.179082360312	199.952995551291	342.993972446701	486.035475257625	390.847680191478
FBgn0040823	326.723945328765	1.46238939627618	0.282519428473896	5.17624364517396	2.26397765293485e-07	5.84735117138563e-05	532.658481762444	216.506404877643	337.283349638716	929.533960831887	1033.88593614652	1026.11595577647
FBgn0004652	676.416155440998	1.45320084136709	0.282063172585474	5.15204033212356	2.57667601008693e-07	6.47511717345629e-05	990.411864527045	506.47033998163	842.65905268044	1947.35335244148	2225.33948272568	2230.197137692
FBgn0053100	741.85507355107	1.32225032758908	0.258339764781508	5.11826094100295	3.08365773876761e-07	7.54522359343716e-05	938.097192211091	376.953115635182	628.423700304057	1547.53197627579	1695.66989996363	1611.82429496831
FBgn0266801	547.775437804204	1.34741062074405	0.264422036061998	5.09568204227929	3.47487923158168e-07	7.93009613298012e-05	884.593550069774	500.67106127955	648.199271292646	1452.14312003322	1835.05663226944	1884.40394513067
FBgn0003429	1702.39259832958	1.13101446813135	0.222128546153644	5.09171147840242	3.54845792268863e-07	7.93009613298012e-05	3169.79355441669	1673.09190555	2329.12280532273	4996.7524270046	5443.35491117704	5263.49051739128
FBgn0262018	283.685544277232	1.56033972205521	0.306529583302697	5.09033974875559	3.57422526304542e-07	7.93009613298012e-05	423.273257829085	217.47295132799	347.171135133011	972.154513621122	970.85889197346	967.545121857289
FBgn0051973	112.98416361942	1.14057262614885	0.224084490119598	5.08992222326548	3.58210408243886e-07	7.93009613298012e-05	174.778564328302	94.7215521339689	151.612710912517	268.915392598745	311.499045239924	344.666830370582
FBgn0264574	838.826093815255	1.0304048426383	0.203253918803519	5.06954477780264	3.98768315485057e-07	8.62266929623269e-05	1263.87492436044	771.304067376604	1020.63919157774	2052.88995934815	2050.80305270798	2134.45635147795
FBgn0283451	100.793125263888	1.38313645005545	0.276317467610899	5.00560627605034	5.5686478180684e-07	0.000111886047810297	121.274922186985	79.2568089284229	96.6805692775472	241.516465805665	273.925230444447	257.93694168256
FBgn0267987	17.1010159228836	1.61803860011183	0.323250584927362	5.0055241214039	5.57102356277749e-07	0.000111886047810297	22.5904266818894	13.5316503048527	17.5782853231904	56.82740371898	48.4823416715835	57.4444717284304
FBgn0037525	911.234623833779	0.664360031686624	0.132774077307781	5.00368780681929	5.62438177349321e-07	0.000111886047810297	1512.36961786123	1221.71471323813	1324.96325623548	2206.12099437612	2116.25421396462	2107.42365889987
FBgn0085450	773.231949346613	1.08795320665254	0.217476738325761	5.00261873995404	5.65567245330602e-07	0.000111886047810297	1167.56836850607	675.615968792288	1031.62561990474	1875.30432272634	2096.86127729599	2135.58271366871
FBgn0037836	52.3601965301904	1.36203850782339	0.273031962463706	4.98856798864508	6.08285041026065e-07	0.000117829881488757	86.7947972514697	59.9258799214905	61.5239986311664	173.526536356171	186.657015435596	173.459777376045
FBgn0263584	65.1279948576797	1.6116930528786	0.323368726371646	4.98407211780367	6.22598565406105e-07	0.000118099291465377	96.3065558543705	43.494590265598	72.5104269581604	185.703837153095	215.746420438547	244.420595393518
FBgn0266450	366.236052878692	0.961781244300216	0.193119744331988	4.98023258899327	6.35079003362964e-07	0.000118099291465377	403.060770797921	362.454918879983	565.801058840191	770.214275405461	922.376550301876	899.963390412076
FBgn0011224	1543.5647982921	1.3123278253624	0.264432274095901	4.96281261373739	6.94796085405984e-07	0.000126670862786369	1885.70614302508	823.497575695321	1326.06189906818	3119.41855414544	3519.81800535696	3377.96021006986
FBgn0037171	149.202054864294	1.45236647083836	0.294042094913594	4.93931479866903	7.83975622205327e-07	0.000138325265106881	216.392508215993	119.851759842981	208.742138212886	463.752205349533	528.45752422026	496.72572612231
FBgn0038755	551.803446423708	0.986315497734925	0.199731837103987	4.93819869699299	7.88474838746474e-07	0.000138325265106881	689.602498710308	471.674667769151	637.212842965652	1105.09004732088	1226.60324429106	1228.86115011211
FBgn0003339	92.1070781977893	0.813162975880971	0.165323348730382	4.91862149010251	8.71558165204282e-07	0.00015006940407536	142.676379043512	142.082328200953	150.514068079818	259.782417001051	258.168469401182	246.673319775025
FBgn0263873	581.860974760841	1.00492093886352	0.204584703406963	4.91200428051808	9.01500844033147e-07	0.000152402815414913	917.884705179927	532.567094140988	822.883481691851	1394.30094124783	1568.40375307573	1596.05522429776
FBgn0285926	803.547070447339	0.890367708610992	0.181650588246359	4.90154046406641	9.50880581994298e-07	0.000157880136631839	413.761499226185	286.0977493026	301.028136159636	592.628638783649	699.357778612592	560.928370995262
FBgn0038653	387.283853516402	1.34465556365448	0.274819899705515	4.89286097948277	9.93806081195611e-07	0.000162112437595733	636.098856568991	311.227957011612	481.205560722337	1131.47419904755	1202.36207345527	1290.81107060355
FBgn0052600	243.324185981806	1.73538085592867	0.356640152818164	4.8659155235767	1.13928175914853e-06	0.000175665839269892	347.179189005879	130.483770796794	280.153922338347	749.918774077254	835.108335293026	934.880618325436
FBgn0001269	44.0618844166365	1.07512082607638	0.220990152380843	4.86501690004528	1.14447027733459e-06	0.000175665839269892	70.1492196963934	53.1600547690642	61.5239986311664	125.832108234884	118.78173709538	143.047998225699
FBgn0000636	725.402060567519	0.686167304873802	0.141071200210293	4.86397864235181	1.15049333443128e-06	0.000175665839269892	808.499481246567	648.552668182583	772.345911387678	1031.01146747292	1295.69058117307	1259.27292926245
FBgn0052547	74.0697386145545	0.986322048752768	0.202795037474796	4.8636399639481	1.15246463706855e-06	0.000175665839269892	108.196254107997	77.3237160277297	123.047997262333	182.659511953864	204.83789356244	221.893351578447
FBgn0038277	3603.27176928784	-2.58868357324972	0.535088823776773	-4.8378576756252	1.31246063666066e-06	0.000196826758059206	14.2676379043512	15.4647432055459	43.945713307976	3.04432519923107	1.21205854178959	7.88453533527476
FBgn0010750	483.921314441011	0.616250879514911	0.127501015885633	4.83330172104418	1.34287023004037e-06	0.000197824192191662	360.257857084868	336.358164720624	341.677920969514	493.180682275434	544.214285263525	554.17019785074
FBgn0031413	133.656780713723	0.738165870222694	0.152884147771006	4.82826951639447	1.37724614299312e-06	0.000197824192191662	89.1727369021949	101.487377286395	115.357497433437	164.393560758478	157.567610432646	189.228848046594
FBgn0263995	1294.57117026508	0.880156843775176	0.182380845422928	4.82592808325982	1.39352791304888e-06	0.000197824192191662	2319.68012928243	1502.01318383865	1856.70638726199	3277.72346450545	3553.75564452707	3616.74899450961
FBgn0262509	893.271056734347	0.996473728488545	0.206591404107213	4.82340362995652	1.41128969970559e-06	0.000197824192191662	1552.79459192355	952.048253591422	1366.71168387805	2496.34666336948	2539.26264504919	2685.24746275643
FBgn0024804	2455.85319656285	1.08742188878632	0.225540362726529	4.82140702285221	1.42549159785344e-06	0.000197824192191662	3299.39126538121	1475.91642967929	2722.43693942911	5250.44619360719	5324.57317408166	5352.47313046081
FBgn0000504	551.552639138314	1.11944151045206	0.232483400828426	4.81514596940284	1.47092328191865e-06	0.000201127127577641	598.051822157387	507.436886431976	783.332339714672	1190.33115289935	1399.92761576697	1512.704422182
FBgn0015519	425.289431167943	1.40033774040143	0.291357759943956	4.80624830679228	1.53788876997434e-06	0.000207236083814803	678.901770282044	330.558886018544	539.433630855406	1274.55748341141	1475.07524535793	1335.8655582337
FBgn0033494	232.269328270676	0.744352877274288	0.155068110412862	4.80016732835966	1.58533116083218e-06	0.000210577273334537	325.777732149352	238.736973235615	310.91592165393	447.515804286967	482.399299632256	533.895678417177
FBgn0001085	583.657386799993	1.09521987036968	0.228988133609518	4.78286736131622	1.7281216409753e-06	0.000226310915743498	378.092404465307	245.502798388042	310.91592165393	636.263966639294	643.603085690271	714.113628937743
FBgn0020503	2350.09874998191	0.335206156698118	0.0701878519971948	4.77584292950745	1.78956038454088e-06	0.000231101839659183	3270.85598957251	3219.5662261046	3473.9086369955	4174.78462321221	4140.39197875323	4254.26999447611
FBgn0013576	2685.34567045437	1.05728571727066	0.221638959579277	4.77030626419486	1.83946027781347e-06	0.000234291803604242	2995.01499008839	2064.54321794038	2860.86593634924	5043.43208005947	5654.25309744843	5782.74348732866
FBgn0287183	3856.0890217804	0.970631598545346	0.204218407753298	4.75290944251167	2.00510169974731e-06	0.000250128929008502	6545.27888862111	3690.2743474234	5007.61403144387	9729.6633367425	10326.7387760473	9811.74104365406
FBgn0004865	132.614149400821	1.23918899189154	0.260791130161381	4.75165313760752	2.0176026753751e-06	0.000250128929008502	204.502809962367	96.6546450346621	172.486924733806	345.023522579521	370.889913787614	398.732215526752
FBgn0264078	668.799199021368	0.625594405675988	0.131944814091199	4.74133379159249	2.12315797804629e-06	0.000259751616840453	966.632468019793	722.976744859273	903.084408478907	1296.88253487244	1299.32675679844	1400.06820310665
FBgn0261698	700.710268353461	1.30802149057611	0.277830009194399	4.70799210772397	2.50168784817279e-06	0.000302086930030008	1017.75817051038	445.577913609792	766.852697224181	1744.3983391594	1888.38720810818	1885.53030732142
FBgn0262869	542.010323946756	1.59337087126645	0.338991040871312	4.70033328069967	2.59737235200644e-06	0.000309620104217383	876.270761292236	352.789454376517	644.903342794548	1747.44266435863	1992.62424270208	1911.43663770875
FBgn0010415	1804.61876248146	0.817301055689958	0.174344452873569	4.68785236478185	2.76087067983336e-06	0.000324344841676693	2157.98023303312	1750.41562157773	2420.31016043678	3518.22515524471	3950.09878769227	3682.07800157331
FBgn0023076	212.30923856748	0.700730287556634	0.149547997665481	4.68565476298838	2.7906632968526e-06	0.000324344841676693	261.573361579772	255.168262891508	348.26977796571	441.427153888505	442.401367753199	521.505694318888
FBgn0011288	2469.64168057935	1.33240050211247	0.284671255844553	4.6804883695038	2.86192347758414e-06	0.000328520549315769	4418.21187104742	1821.94005890338	3288.23799826931	7557.02991955793	8252.9066110453	8180.76859144294
FBgn0004870	58.0761168964879	1.51905041399451	0.325078787328607	4.67286846514219	2.97021999617826e-06	0.000336793969810555	97.4955256797331	47.3607760669844	45.0443561406754	153.231035027964	189.081132519176	199.366107763376
FBgn0052423	2577.55057625019	1.10812947019917	0.238233394948348	4.65144473317616	3.2961761630319e-06	0.000369251156191212	3550.26389853272	1921.49434328908	2888.33200716672	5986.1581167547	6215.436202297	5816.53435305127
FBgn0053202	268.109758693871	1.27046504779568	0.273812063431619	4.63991626911267	3.48550372277263e-06	0.000385812066837379	457.753382764601	241.636612586655	355.960277794606	777.317700870334	871.470091546713	894.331579458309
FBgn0000546	1242.89925670916	1.10742594903795	0.239772352279832	4.61865573118915	3.86234051629969e-06	0.000422494613182994	1728.76212607722	915.31948847825	1552.38232260425	2896.16803953516	3077.41663760376	3064.83152104038
FBgn0259175	694.368136800711	0.618413832355445	0.13513111214249	4.57639859948281	4.73048834135969e-06	0.000511212172248177	872.703851816148	725.876384210313	897.59119431541	1150.75492530934	1293.26646408949	1386.5518568176
FBgn0035533	636.942757701806	0.483403679712075	0.10568342598904	4.57407275727613	4.78333609223397e-06	0.000511212172248177	682.468679758132	654.351946884663	702.032770094917	940.696486562401	952.678013846616	956.281499949753
FBgn0024963	538.140636342012	0.942973388915083	0.207145878002997	4.55221893868165	5.30830512461664e-06	0.000560870693735063	966.632468019793	626.322099824611	773.444554220378	1521.14782454913	1576.88816286825	1448.50177730905
FBgn0038806	200.240749269627	-0.733568148357747	0.162584553113113	-4.51191785635004	6.42440699244343e-06	0.000671170069839765	168.833715201489	215.539858427297	149.415425247118	115.684357570781	115.145561470011	91.2353374510365
FBgn0024321	327.352540576496	0.767167788901444	0.170145720510233	4.50888677423599	6.51686751557876e-06	0.000673264823998348	420.89531817836	335.391618270278	468.021846729945	656.559467967501	726.023066531963	699.470920457947
FBgn0260943	1296.89808627687	1.5198794374372	0.337542212998921	4.50278329318786	6.70692636590705e-06	0.000676800643398089	2148.46847443022	928.851138783103	1613.90632123542	4344.25205930274	4765.81418631666	4339.87352097338
FBgn0038063	731.061208229263	1.07997441709376	0.239905663251346	4.50166287221941	6.74238682861936e-06	0.000676800643398089	1116.44266601548	678.515608143328	1048.10526239523	1898.64414925378	2072.62010646019	2036.4628408824
FBgn0052183	267.09220556041	0.818621655089422	0.181883136810231	4.50081117714357	6.76946223231042e-06	0.000676800643398089	445.863684510975	360.52182597929	408.695133764177	663.662893432373	755.112471534913	723.124526463771
FBgn0010113	729.220284807102	1.07548048860483	0.239091693713097	4.49819260511566	6.85335968161421e-06	0.000677899343826052	842.979606182083	520.001990286482	675.665342110131	1311.08938580218	1598.70521662047	1384.2991324361
FBgn0086655	415.113822511483	1.20913654428816	0.269191086520475	4.49174064385744	7.06434197101617e-06	0.000691413175226404	401.871800972559	272.566098997747	438.358490247061	774.273375671102	913.892140509349	883.067957550773
FBgn0266347	1416.07011840028	1.17024969851744	0.260899986388641	4.48543411103985	7.27656307289957e-06	0.000699263172253046	2312.54631033026	938.516603286569	1701.79774785137	3636.95383801472	3908.88879727142	3596.47447507605
FBgn0085382	228.483307880794	1.72588865036003	0.384822466958507	4.48489575985729	7.29495888454996e-06	0.000699263172253046	334.10052092689	133.383410147834	283.449850836445	729.623272749047	814.503340082603	937.133342706943
FBgn0005561	242.65813901489	0.659817399151619	0.147243982364722	4.4811162300491	7.42536568635228e-06	0.000704500511752077	433.973986257349	334.425071819931	424.076133421969	592.628638783649	661.783963817115	627.38374024972
FBgn0003256	1786.99731551942	0.777751391256364	0.173944168716001	4.47127027595963	7.77563547986259e-06	0.000730281400926892	1973.68991010191	1393.75998139983	1762.22310364984	2852.53271167951	3043.47899843365	2895.87719242735
FBgn0261552	2538.03273987515	0.810421620840833	0.181370378098059	4.4683240413309	7.88348217270556e-06	0.000733006172418163	3832.04974714366	3042.68822569116	3304.7176407598	5617.79476764774	6347.55058335207	5885.24244668723
FBgn0000479	1138.71809951191	1.24619238748983	0.279380915444553	4.46054944557284	8.17497943945376e-06	0.000752583750772684	1630.07763057212	835.096133099481	1233.77590112143	2868.76911274208	3067.72016926945	2835.05363412665
FBgn0011206	581.96689173943	1.05761014066879	0.237856475802127	4.44642146951093	8.73125646636892e-06	0.000795913947297042	1013.00229120893	509.369979332669	727.301555247003	1626.6844314558	1637.49108995773	1414.71091158644
FBgn0262475	308.048472566573	0.924780331783454	0.208638632937092	4.43245011129981	9.31682643886701e-06	0.000841047109015393	282.974818436299	194.275836519671	244.997351691966	444.471479087736	455.734011712885	468.566671353472
FBgn0004573	115.138204532328	1.64544370630181	0.371600106590635	4.42799578664942	9.51127591592305e-06	0.000850344648713966	177.156503979027	67.6582515242635	129.639854258529	352.126948044394	379.374323580141	437.028530012373
FBgn0052982	276.55440538505	0.576779219375311	0.130475590773882	4.42059097762497	9.84313330715751e-06	0.0008652624316217	430.407076781261	326.692700217158	426.273419087367	575.377462654672	610.877505061952	575.571079475058
FBgn0259241	124.898785073916	1.41210146785297	0.319470729102856	4.42012785277217	9.8642522856421e-06	0.0008652624316217	203.313840137004	100.520830836049	170.289639068407	402.865701364912	435.129016502462	421.259459341823
FBgn0028704	1046.26329548125	1.41370247719398	0.320137075762489	4.4159286262826	1.0057726914769e-05	0.000873988269659085	1918.99729813524	792.568089284229	1220.59218712903	3372.09754568162	3665.26503037171	3435.40468179829
FBgn0085408	379.907163353641	0.765795985962773	0.173916250798234	4.40324571423286	1.06643264905188e-05	0.000918119515822624	431.596046606624	332.491978919238	449.344918574055	593.643413850059	707.842188405119	760.294478758638
FBgn0028582	1217.2482752043	0.413932663562857	0.0940862844168916	4.39950058744739	1.08500283732275e-05	0.000920526043095961	1456.48803606918	1382.16142399567	1586.44025041793	1939.23515191019	2001.10865249461	1954.23840095739
FBgn0261239	476.125535240486	0.841190717282819	0.191236349068301	4.39869680309774	1.08902844418752e-05	0.000920526043095961	481.532779271853	295.763213806066	508.671631539822	727.593722616226	790.262169246811	782.821722573709
FBgn0040238	621.176117718074	0.410106977670463	0.0936188231422704	4.38060385620563	1.18350866044677e-05	0.000991375092327391	457.753382764601	543.199105094801	560.307844676694	676.854969295708	732.083359240911	670.185503498355
FBgn0001235	1166.34546847208	1.09879555572146	0.25145707458089	4.36971422479503	1.24409239951586e-05	0.00103281885095522	1864.30468616856	1186.91904102565	1780.90003180573	3393.40782207623	3689.5062012075	3264.19762880375
FBgn0028875	464.88082227743	1.40557081862273	0.322327911232749	4.36068602699376	1.29655298464514e-05	0.00106684510187881	867.947972514697	346.02362922409	577.886129999885	1572.90135293605	1658.09608516816	1512.704422182
FBgn0025726	5637.08979490477	1.18231516147105	0.271904261847269	4.34827741734763	1.37210976004071e-05	0.00110760998720778	8675.91281567089	4473.17697220416	7257.63455281224	15033.8926088694	16007.6571614151	15266.7131334734
FBgn0031971	506.649398669145	-0.646705820161737	0.14884156318602	-4.3449276285381	1.39321587978622e-05	0.00110760998720778	777.58626578714	785.802264131803	760.260840227985	489.121582009792	541.790168179946	453.923962873676
FBgn0019650	544.799350856029	0.55714898404484	0.128271222210805	4.34352284512581	1.40215889016283e-05	0.00110760998720778	970.199377495881	852.49396920572	886.604765988416	1320.22236139987	1313.87145929991	1350.50826671349
FBgn0287724	274.964938640987	1.1899626470903	0.27399301209723	4.34304013077539	1.40524452382322e-05	0.00110760998720778	498.178356826929	240.670066136309	383.426348612091	817.908703526748	946.617721137668	792.95898229049
FBgn0262123	408.81372356136	1.00366144122562	0.2310999442687	4.34297569565252	1.40565689923121e-05	0.00110760998720778	562.382727396509	318.960328614385	495.48791754743	844.292855253417	921.164491760086	992.325090053867
FBgn0262160	3140.32564708171	0.762702502395665	0.175946178850971	4.33486255499579	1.45851222426653e-05	0.00112255336247843	4971.08283984103	3579.12150563354	4869.18503452374	7123.72096620071	7843.23082392042	7798.93180877749
FBgn0027556	566.257598656195	0.880016712369968	0.203018795189791	4.33465636296033	1.45987990584356e-05	0.00112255336247843	639.665766045078	433.979356205633	571.294273003688	897.061158706756	992.675945725672	1135.37308827957
FBgn0039078	34.5942719151043	1.24210541447244	0.286561789898808	4.3345116420129	1.46084057711218e-05	0.00112255336247843	53.503642141317	32.8625793117851	46.1429989733748	104.521831840267	88.4802735506399	118.268030029121
FBgn0263980	706.754091935429	0.920550064743915	0.212629062995839	4.32937083846308	1.49535942949243e-05	0.0011367081351292	1166.37939868071	806.099739589082	981.088049600565	1650.02425798324	1941.71778394692	1997.04016420602
FBgn0262593	485.672478664315	1.44503375632538	0.333869150571632	4.32814398650273	1.50371155754884e-05	0.0011367081351292	816.822270024106	391.451312390382	613.042700646265	1414.59644257604	1745.36430017701	1796.54769425189
FBgn0023526	328.498282704448	0.889522397959481	0.205814795111585	4.32195555949813	1.54652343316084e-05	0.00115964313560721	204.502809962367	149.814699803726	202.15028121669	359.230373509266	375.738147954772	293.980531786673
FBgn0264959	1240.14695492503	0.613885164139324	0.142348006191865	4.31256594709093	1.61370727144762e-05	0.0011975420220498	1280.52050191552	1016.80686576465	1282.1161857602	1671.33453437786	1927.17308144544	1877.64577198615
FBgn0031948	387.801731516214	0.409400669084953	0.0949967218927695	4.30962943697233	1.63528325055233e-05	0.0011975420220498	496.989387001567	559.630394750694	589.971201159578	709.32777142084	694.509544445434	785.074446955216
FBgn0029761	569.428441441272	0.946018737344562	0.21951568366447	4.30957242577052	1.63570484835797e-05	0.0011975420220498	1056.99417474735	723.943291309619	778.937768383875	1546.51720120938	1747.78841726058	1635.47790097414
FBgn0001323	79.0509276901933	0.819635292088067	0.190504703350968	4.30244123987874	1.68926478853384e-05	0.00122709250029591	130.786680789886	91.821912782929	140.626282585523	222.235739543868	193.929366686334	221.893351578447
FBgn0033649	122.131404117615	0.643899461226151	0.149760669850986	4.2995231115542	1.71166026307551e-05	0.00123372225783536	114.14110323481	130.483770796794	157.105925076014	200.925463149251	203.625835020651	224.146075959954
FBgn0003435	1430.97661564892	1.3586352547117	0.316852679540261	4.28790836385861	1.80363466899746e-05	0.00129001501171833	2463.54547815131	931.750778134143	1571.05925076014	4127.09019509092	4346.44193085746	4258.77544323913
FBgn0000114	3640.98856932747	0.97686846030945	0.228045651666386	4.28365308950742	1.83849495465976e-05	0.0013049103884295	1583.70780738298	948.182067790035	1580.94703625444	2534.90811589307	2818.03610966079	2739.3128479126
FBgn0003118	230.616576210506	0.757040532578323	0.177224908145026	4.27163732514858	1.94042975495191e-05	0.0013616042992979	296.053486515287	211.67367262591	252.687851520862	441.427153888505	439.97725066962	400.984939908259
FBgn0038881	620.471124841599	0.995369627236957	0.233063533259255	4.27080810677373	1.94765940854615e-05	0.0013616042992979	1026.08095928792	602.158438565945	896.492551482711	1573.91612800246	1751.42459288595	1705.31235680086
FBgn0010473	466.441896684256	1.23261225588997	0.289002426616346	4.26505849906333	1.99849832401573e-05	0.00138335366090463	865.570032863972	399.183683993155	625.127771805959	1335.44398739603	1603.55345078762	1499.18807589296
FBgn0264753	196.443769888483	0.731411131861806	0.171534069130477	4.26394089272994	2.00852596496155e-05	0.00138335366090463	362.635796735593	260.000995143241	301.028136159636	471.870405880816	535.729875470998	523.758418700395
FBgn0000711	933.264497710551	0.751658274091596	0.176371328174422	4.26179403348511	2.02792307065366e-05	0.00138644328756895	1243.66243732928	871.824898212652	1198.61933047505	1728.16193809684	1921.1127887365	1928.33207057006
FBgn0028509	812.277387060881	0.599107620055165	0.14082312803846	4.25432688792102	2.09678801612464e-05	0.00142306094700196	1121.19854531693	799.333914436656	1106.3333325283	1482.58637202553	1598.70521662047	1500.31443808371
FBgn0259111	626.538570649796	0.514923970214716	0.121257234850038	4.24654224427544	2.17094863258872e-05	0.00145372083616828	1105.74193758722	835.096133099481	938.240979125288	1342.5474128609	1318.71969346707	1448.50177730905
FBgn0025741	3654.13006444289	0.632063862725111	0.148923632781831	4.24421464154764	2.19360311562966e-05	0.00145372083616828	3343.38314891963	2630.9394378435	3190.45878615906	4833.37364131253	4964.59178717015	4402.94980365558
FBgn0283427	19677.2263323982	1.01941490847206	0.240217441427736	4.24371728552746	2.19847295798929e-05	0.00145372083616828	28622.0706059539	18579.9224150131	26163.0804179035	45451.7752245199	46952.723791845	56311.3513645324
FBgn0052773	64.6176390432268	0.897835405330776	0.211614970924785	4.24277829402673	2.20769512444162e-05	0.00145372083616828	85.6058274261072	71.52443732565	68.1158556273628	128.876433434115	135.750556680434	154.311620133235
FBgn0034408	272.520899346976	0.975640169964858	0.23002149680976	4.24151735162286	2.22013722021828e-05	0.00145372083616828	473.209990494315	265.800273845321	392.215491273686	691.061820225453	746.628061742386	783.948084764462
FBgn0003321	697.546863921101	0.396460102716517	0.0935117847091635	4.23968063436679	2.2383801294273e-05	0.00145541667436469	720.515714169735	591.526427612132	724.005626748905	858.499706183162	905.407730716822	912.353374510365
FBgn0083950	667.898327323963	1.22297321045937	0.288704106721771	4.23607833066943	2.27457457192144e-05	0.00146868016456427	1216.31613134594	612.790449519758	956.917907281178	2037.668333352	2219.27919001673	2243.71348398105
FBgn0053516	128.043880847841	1.11017174607179	0.26223759614771	4.23345760630929	2.30125578899928e-05	0.00147566043628381	184.290322931203	128.550677896101	202.15028121669	346.038297645932	390.282850456247	373.952247330174
FBgn0034046	202.215627703684	0.884703417294518	0.209187836925616	4.22922972146371	2.34492808459447e-05	0.00149336584455886	177.156503979027	115.985574041595	164.79642490491	241.516465805665	313.923162323503	288.348720832906
FBgn0003016	885.707019772062	0.797300026616252	0.188958884592292	4.21943656333784	2.44913621648778e-05	0.00154912030890499	1156.86764007781	818.664843443588	1182.13968798455	1729.17671316325	1859.29780310523	1896.79392922896
FBgn0052062	1111.92483927378	0.925221526244338	0.219645554941762	4.2123389498579	2.52739907405847e-05	0.00158782139125646	1942.77669464249	1083.49857083856	1586.44025041793	2894.13848940234	3081.05281322913	2780.98824897048
FBgn0261588	441.154255724849	1.27317662438552	0.302366132877955	4.21071173635512	2.54567404006416e-05	0.00158856894124272	728.838502947273	378.886208535876	631.719628802155	1263.39495768089	1445.98584035498	1492.42990274844
FBgn0265595	277.482252212558	1.37261377022589	0.32626928410279	4.20699660404885	2.58787028789974e-05	0.00159587256890146	481.532779271853	217.47295132799	292.23899349804	821.967803792389	884.802735506399	857.161627163442
FBgn0085638	2104.79859780675	1.33673424007551	0.317766033614262	4.206661816153	2.59170529042935e-05	0.00159587256890146	3193.57295092394	984.910832903207	2508.20158705273	5216.95861641565	5677.28220974243	5991.12049261807
FBgn0262737	2887.0591798558	1.06479509168488	0.25338559456151	4.2022716150361	2.64249797617896e-05	0.00161644382779684	3827.29386784221	2280.08307636768	3373.93213921986	6461.07284783474	6918.43015653497	6451.80262863626
FBgn0267033	1168.86492457856	1.25179946466103	0.298046889786483	4.20000848040322	2.66904983276537e-05	0.0016220147284348	1690.71509166562	780.002985429723	1307.38497091229	2892.10893926952	3259.2254188722	2842.93816946193
FBgn0031736	458.676772659063	0.891828790715732	0.212620850264827	4.19445595107407	2.73527296826405e-05	0.00165146545837137	548.115089492158	289.963935103986	462.528632566448	749.918774077254	839.956569460184	819.991674868575
FBgn0266129	48.6471294251319	1.13656959530365	0.271229120771297	4.19044087917836	2.78412952757849e-05	0.00167011847402741	64.2043705695804	30.9294864110919	61.5239986311664	107.566157039498	128.478205429696	105.878045930833
FBgn0027790	156.592000368402	0.56803265711094	0.135659110500876	4.18720611548807	2.82409340804428e-05	0.00168323208384588	244.927784024695	237.770426785269	277.956636672948	368.36334910696	336.952274617505	421.259459341823
FBgn0264273	228.513392884569	0.730514796260981	0.174884711607436	4.17712211402887	2.95220552486998e-05	0.00174838260956949	386.415193242845	286.0977493026	337.283349638716	527.683034533386	595.120744018687	550.79111127848
FBgn0085386	264.822696534579	1.23784849962841	0.297223519281266	4.16470574947007	3.11754375341808e-05	0.00181068539585084	469.643081018227	223.27223003007	366.9467061216	843.278080187007	860.561564670607	792.95898229049
FBgn0036975	428.951105545276	0.491655074343117	0.118069851676627	4.1641034299736	3.12578403335667e-05	0.00181068539585084	598.051822157387	545.132197995494	554.814630513197	782.391576202385	758.748647160282	844.771643065153
FBgn0031670	502.862184574783	-0.461789306633	0.110913905547607	-4.16349333614249	3.13415176942452e-05	0.00181068539585084	496.989387001567	485.206318074004	432.865276083564	371.407674306191	316.347279407082	337.908657226061
FBgn0004244	469.557927735789	1.46718860854921	0.352400734773794	4.1634096180049	3.13530166414266e-05	0.00181068539585084	828.711968277732	346.990175674437	528.447202528412	1591.16730413144	1719.91107079942	1397.81547872514
FBgn0032706	145.918631920964	-0.709214980420773	0.170672426450789	-4.15541628585953	3.24695816120358e-05	0.00186359364091796	228.282206469619	289.963935103986	227.419066368776	161.349235559247	144.234966472961	150.932533560974
FBgn0263397	589.584324029398	0.833642206437363	0.201018197382363	4.14709820948033	3.36715654375546e-05	0.00192072524808824	1064.12799369953	731.675662912392	854.744123840134	1500.85232322092	1647.18755829205	1573.52798048269
FBgn0287613	165.779794351462	1.35064628165691	0.326331162472039	4.13888232869161	3.49001886052061e-05	0.00197867044909272	205.69177978773	91.821912782929	223.024495037978	368.36334910696	437.553133586041	519.252969937381
FBgn0032151	469.514537980192	2.04034943018416	0.49351871176731	4.1342899094496	3.5605379089124e-05	0.00200641705921621	639.665766045078	253.235169990815	386.722277110189	1570.87180280323	1872.63044706491	1817.94857587621
FBgn0001991	820.617262846703	0.899272917144812	0.217926370751778	4.12649884473642	3.68327853568389e-05	0.00206307974848125	1608.6761737156	847.661236953987	1298.59582825069	2167.55954185252	2362.30209794791	2470.11228432251
FBgn0261836	17315.9664995525	1.00381186742987	0.243467726697904	4.12297712326942	3.74006855491128e-05	0.0020823447559021	22906.6926554358	17547.6508060429	24955.6719447669	36370.5531552136	46120.0395736356	48674.6157112234
FBgn0261988	910.547459703276	0.873230421789253	0.212185156395618	4.11541710373519	3.8647988144503e-05	0.00213898210575946	1180.64703658506	836.062679549827	1189.83018781345	1781.94501661659	2008.38100374535	2081.51732851254
FBgn0260003	2368.36880449734	0.85748522361542	0.208579218504632	4.11107697959074	3.93817863297823e-05	0.00216669733310246	2872.55109807604	1978.52058385953	2791.65143788918	4260.02572879068	4735.51272277192	4850.11559338473
FBgn0051549	453.496014914125	-0.602839016958015	0.146972943948897	-4.10170063115577	4.10124676513691e-05	0.00224206823735375	354.313007958055	433.979356205633	371.341277452397	259.782417001051	256.956410859393	247.799681965778
FBgn0000535	241.968876940556	1.1897820017434	0.290158583929375	4.10045426067077	4.1233993179984e-05	0.00224206823735375	432.785016431986	254.201716441161	337.283349638716	721.505072217764	781.777759454284	831.255296776111
FBgn0032136	8944.28044333888	1.03989328432642	0.253721465799316	4.09856249667474	4.15723993342231e-05	0.00224732656400934	11278.5677633896	9038.17585719126	14042.8526875637	21493.9506816378	24326.014933717	24825.022684208
FBgn0263257	572.962504521634	0.918589929430567	0.224377687400769	4.09394508015336	4.24094804911934e-05	0.0022787203805987	1024.89198946256	741.341127415859	898.68983714811	1545.50242614297	1765.96929538743	1724.46051404367
FBgn0000157	129.223931682487	0.599399239420937	0.146456744240889	4.09267079182817	4.26432938507394e-05	0.0022787203805987	253.250572802234	220.37259067903	213.136709543684	338.934872181059	347.860801493612	352.551365705857
FBgn0026206	2064.4126204602	1.38109488573712	0.337675134236164	4.09001062178067	4.31353434411123e-05	0.0022918424189455	2949.83413672461	1010.04104061222	1544.69182277536	4919.62952195741	5020.34648009247	4393.93890612955
FBgn0041111	833.544476895511	0.934852281303142	0.228814592446759	4.08563226368819	4.39569515017065e-05	0.00232222576740265	1127.14339444374	678.515608143328	1031.62561990474	1690.61526063965	1885.9630910246	1844.98126845429
FBgn0264908	379.685477503626	1.06204723531288	0.260410668787578	4.07835531569257	4.53554139442472e-05	0.00238120560024936	740.728201200899	300.595946057799	558.110559011295	1118.28212318421	1139.33502928221	1077.92861655114
FBgn0003731	1834.3677218833	0.750569138952533	0.184090346812019	4.07717814622276	4.55855664491703e-05	0.00238120560024936	2728.68574920717	2083.87414694732	2979.51936228077	4077.36621683681	4341.5936966903	4689.04580010698
FBgn0086676	1313.56739274133	0.49647181079288	0.121940285882215	4.07143387602382	4.6724626617553e-05	0.00242284680325195	1502.85785925833	1334.80064792868	1575.45382209094	2033.60923308636	2044.74275999903	2145.71997338549
FBgn0053547	496.112925242565	1.21853525502094	0.299385793970451	4.07011715172166	4.69895023418559e-05	0.00242284680325195	908.372946577026	500.67106127955	666.876199448536	1551.59107654144	1792.6345833068	1484.54536741316
FBgn0264002	58.0901141004058	1.34590070982207	0.330748985718574	4.06925120842931	4.71644731542916e-05	0.00242284680325195	79.6609782992942	33.8291257621317	69.2144984600622	172.511761289761	135.750556680434	153.185257942481
FBgn0266096	87.5690503014919	1.17430501839261	0.288878722402651	4.06504504252069	4.80231865752246e-05	0.00245340433393648	46.3698231891414	13.5316503048527	32.959284980982	53.7830785197489	66.6632197984273	85.6035264972688
FBgn0266350	91.5140776154633	1.24158221469448	0.30568796184627	4.06159996355653	4.8737540704953e-05	0.00247629318838608	60.6374610934926	53.1600547690642	72.5104269581604	128.876433434115	186.657015435596	125.026203173643
FBgn0260660	490.510677872856	0.665249525965999	0.163950110700507	4.05763389316174	4.95723976010758e-05	0.00250496735153579	741.917171026262	572.1954986052	752.570340399089	1036.08534280497	1117.51797553	1121.85674199052
FBgn0032728	143.656956841808	0.674842046559648	0.166365889448147	4.05637266628494	4.98407141357411e-05	0.00250496735153579	82.0389179500194	78.2902624780763	82.398212452455	122.787783035653	123.629971262538	140.795273844192
FBgn0259735	1264.95228939201	0.787129362943019	0.194245390073313	4.05224218008952	5.07291131312564e-05	0.00253066412020774	1895.21790162798	1212.04924873466	1628.18867806051	2603.91282040898	2862.88227570701	2702.14289561774
FBgn0261822	1471.65320636433	0.632684234469112	0.156161558158024	4.05147234653538	5.08963422756343e-05	0.00253066412020774	1741.84079415621	1453.68586132132	1612.80767840272	2489.24323790461	2536.83852796561	2427.31052107387
FBgn0020378	92.6241713852817	1.00275328062492	0.247808941650168	4.0464773948331	5.19941430918653e-05	0.00257149756632002	154.566077297138	102.453923736742	147.21813958172	261.811967133872	271.501113360868	274.832374543863
FBgn0260941	538.600246378118	0.89428734686431	0.22129637589029	4.04112965368969	5.31943368444022e-05	0.00260450340288786	727.649533121911	489.07250387539	694.342270266021	1032.02624253933	1288.41822992233	1229.98751230286
FBgn0031016	582.032992277317	0.977791149597264	0.241967084224666	4.04100893611375	5.32217301084849e-05	0.00260450340288786	760.940688232064	465.875389067071	698.736841596819	1150.75492530934	1294.47852263128	1344.87645575972
FBgn0051721	232.754627359467	1.06972832582987	0.2650365307251	4.03615427240634	5.43344953273447e-05	0.00263133794856949	311.510094245001	163.346350108579	282.351208003746	481.003381478509	572.091631724685	533.895678417177
FBgn0265998	1224.21194228145	0.489982161514571	0.121408621903622	4.0358102565692	5.44141798424085e-05	0.00263133794856949	1291.22123034378	1206.24997003258	1385.38861203394	1668.29020917863	1884.75103248281	1900.17301580122
FBgn0259749	984.105929315748	-0.357957384495259	0.0887146930780497	-4.03492783523845	5.46190819610573e-05	0.00263133794856949	878.648700942961	969.446089697661	898.68983714811	713.386871686481	738.143651949859	693.839109504179
FBgn0032694	854.130185390227	0.658660554829118	0.163427019734336	4.03030389895029	5.5704785836376e-05	0.00266446938812422	1003.49053260603	664.017411388129	859.138695170931	1299.92686007167	1253.26853221043	1431.60634444775
FBgn0265276	328.341754521581	0.976545808301749	0.242345157407679	4.02956600720921	5.58799237130804e-05	0.00266446938812422	489.855568049391	316.060689263345	515.263488536019	889.957733241883	909.043906342191	798.590793244258
FBgn0011582	223.031845372348	1.32603763906109	0.32977111824086	4.02108482433132	5.79307382932551e-05	0.00274816328903411	399.493861321833	180.744186214818	283.449850836445	668.736768764425	773.293349661757	720.871802082264
FBgn0053653	2293.28260024438	0.686827512591597	0.170918554405655	4.0184491085824	5.8582458368532e-05	0.00276052240210189	4373.03101768364	2832.94764596595	3948.52234072164	6048.05939580573	6032.41536248678	5871.72610039819
FBgn0020307	114.512029478902	0.836706043770189	0.208258330316392	4.01763541702769	5.8785054379025e-05	0.00276052240210189	139.109469567424	106.320109538128	149.415425247118	210.058438746944	229.079064398232	264.695114827081
FBgn0039925	375.826142490522	1.02877444536745	0.256242089278126	4.01485348587998	5.94827337765239e-05	0.0027660634801078	737.161291724812	355.689093727557	522.953988364915	1095.95707172319	1113.88179990463	1083.5604275049
FBgn0260486	743.080780802303	0.667830429149361	0.166342438232754	4.01479283485614	5.9498031406922e-05	0.0027660634801078	1065.31696352489	785.802264131803	1011.85004891615	1479.5420468263	1534.46611390562	1531.85257942481
FBgn0052264	1464.59683322724	0.845881033861073	0.210889741801021	4.01101080895239	6.0459341957224e-05	0.00278739670161578	2317.30218963171	1413.09091040676	2002.82588401101	3260.47228837648	3625.26709849266	3416.25652455548
FBgn0264606	536.030515043792	1.05403581298215	0.262810414657804	4.01063182505371	6.05564781379208e-05	0.00278739670161578	900.050157799488	546.098744445841	922.859979467496	1433.87716883783	1758.69694413669	1724.46051404367
FBgn0052521	1806.04339555293	0.581614678218982	0.145317191577497	4.00238039219749	6.27083710801391e-05	0.00287222874040953	2684.69386566875	2502.3887599474	3106.9619308739	4080.41054203605	4033.73082707575	4297.07175772475
FBgn0040397	490.814776225291	0.715748240167375	0.17893091790559	4.00013730743296	6.33057419875857e-05	0.00288537641666947	524.335692984906	397.250591092461	476.81098939154	764.125625006999	724.811007990173	805.348966388779
FBgn0036576	247.547504037956	0.974915945324686	0.244046417561806	3.99479719909342	6.47496530475737e-05	0.00293679158066507	349.557128656604	203.941301023137	303.225421825035	532.756909865437	587.84839276795	560.928370995262
FBgn0087002	128041.844041949	1.38097716365638	0.346815775439355	3.98187528207712	6.83736571284531e-05	0.00308610807757455	174516.990966722	93697.0128966015	174917.122679737	393289.269063197	379740.365259761	381078.740911072
FBgn0053144	1098.26863549618	0.65147253526174	0.163719409665792	3.97920159003518	6.91470914927691e-05	0.00310594037053027	1796.53340612289	1368.62977369082	1602.91989290843	2409.07600765819	2510.17324004624	2568.10579491807
FBgn0029768	305.763231447174	0.532746225447253	0.13396005107952	3.97690371983369	6.98184167125344e-05	0.00312101749323627	449.430593987063	399.183683993155	460.331346901049	631.190091307242	627.846324647006	633.015551203488
FBgn0285879	277.774382859164	0.571447356863015	0.143797891542671	3.97396200133743	7.06868452172213e-05	0.0031447190757403	462.509262066051	407.882602046274	542.729559353504	644.382167170577	707.842188405119	746.778132469595
FBgn0046706	846.622683172153	0.700357951299183	0.17641513061551	3.96994265092593	7.18899331545122e-05	0.00318301237366978	741.917171026262	588.626788261092	620.733200475161	1005.64209081266	1113.88179990463	1049.7695617823
FBgn0033368	150.292730659481	0.896912421745873	0.226016091396716	3.96835648383797	7.23700200296259e-05	0.00318908268358039	291.297607213837	175.911453963085	235.109566197672	422.146427626709	446.037543378568	437.028530012373
FBgn0037698	447.261743911381	1.32298270156319	0.333513489694078	3.96680416968058	7.28427955472445e-05	0.00319477506131264	806.121541595842	318.960328614385	631.719628802155	1379.07931525168	1501.7405332773	1511.57805999125
FBgn0004509	1520.67919132082	0.807746620475409	0.20374597388656	3.96447892965551	7.35564431899687e-05	0.00321092867971986	2066.4295564802	1403.42544590329	2006.12181250911	3029.10357323492	3281.04247262441	3273.20852632978
FBgn0265042	32.9181499900214	0.946179495838153	0.238992107933356	3.95904075670146	7.52513955895022e-05	0.00324686230509242	39.2360042369658	26.0967541593588	35.1565706463808	57.8421787853904	71.5114539655857	63.0762826821981
FBgn0004369	611.056914316171	0.953367992978979	0.24080851847487	3.95902935252047	7.52549885075041e-05	0.00324686230509242	970.199377495881	586.693695360399	731.696126577801	1451.12834496681	1479.92347952509	1498.0617137022
FBgn0053970	805.483429153702	0.626749067137651	0.158365224136033	3.95761803487414	7.57008823755124e-05	0.00324686230509242	1456.48803606918	1048.70289862608	1200.81661614044	1936.19082671096	1872.63044706491	1910.310275518
FBgn0052843	114.511976183249	0.745173275333538	0.188299664104165	3.95737973765751	7.57764164556954e-05	0.00324686230509242	165.266805725401	108.253202438822	150.514068079818	247.605116204127	227.867005856442	232.030611295229
FBgn0016977	3451.49879917568	0.848172853186952	0.214720257464311	3.95012963938872	7.81088751095726e-05	0.00332283778177807	4188.74069475244	3068.78497985052	3918.85898423876	6135.33005151702	7096.60276217803	6886.57843426713
FBgn0005640	1027.55995993734	0.954620313498918	0.241759681604313	3.94863323430968	7.85986663782657e-05	0.00332283778177807	1363.7483896909	786.76881058215	1117.31976085529	2022.44670735584	2165.94861417799	2142.34088681323
FBgn0029922	134.312956403805	1.32835145959641	0.336413881406052	3.94856316286512	7.86216726168181e-05	0.00332283778177807	222.337357342806	111.152841789861	179.078781730002	418.087327361067	456.946070254674	409.995837434288
FBgn0086675	315.745390734716	1.30075576159073	0.330363870261395	3.93734266571441	8.23889162459463e-05	0.00346629929074574	612.319460061739	274.49919189844	375.735848783195	1063.48426959805	1113.88179990463	930.375169562422
FBgn0000179	166.493899042459	1.28566723565745	0.32675944873955	3.93459849628469	8.33358886938235e-05	0.0034763971268268	293.675546864562	167.212535909965	206.544852547487	528.697809599796	567.243397557527	529.390229654163
FBgn0011259	569.468878031452	1.23529845889578	0.313967329362282	3.93448089457227	8.33767002884896e-05	0.0034763971268268	935.719252560366	465.875389067071	742.682554904795	1599.28550466272	1816.87575414259	1629.84609002037
FBgn0036665	42.7991652534328	1.23001381299593	0.312955504701204	3.93031531485694	8.48345352177547e-05	0.00351720868084273	52.3146723159544	43.494590265598	65.918569961964	104.521831840267	139.386732305803	135.163462890425
FBgn0053774	115.330879007614	-0.951043231824859	0.242024678427628	-3.92952998844392	8.51120620767491e-05	0.00351720868084273	99.8734653304583	153.680885605113	134.034425589327	67.9899294494939	65.4511612566377	67.5817314452123
FBgn0042185	382.969511048051	0.809476463491799	0.206191748881122	3.92584314301779	8.64264648691267e-05	0.00355572243519088	292.486577039199	183.643825565858	310.91592165393	428.235078025171	482.399299632256	466.313946971965
FBgn0267001	1315.94250882799	1.32774954872884	0.338505454579222	3.92238745570377	8.76758506059287e-05	0.00359123373979703	2326.81394823461	940.449696187262	1821.54981661561	4020.53881311783	4390.07603836189	4360.14804040694
FBgn0250867	474.64154663643	1.17338540134993	0.299596487662598	3.91655259547429	8.98242260968148e-05	0.00366309497477274	676.523830631319	341.190896972357	586.67527266148	1109.14914758652	1288.41822992233	1218.72389039533
FBgn0261804	493.93608413259	1.45950884032778	0.372839866760134	3.91457290501273	9.05643711760847e-05	0.00367715075631107	828.711968277732	341.190896972357	677.86262777553	1568.84225267041	1842.32898352017	1668.14240450599
FBgn0051706	461.869891979337	-0.5732100606246	0.146571211329191	-3.91079568372538	9.19925668329707e-05	0.00370610858820157	947.608950813992	1109.59532499792	873.421051996023	652.50036770186	676.32866631859	642.026448729516
FBgn0085400	149.551303307822	0.877954797002256	0.224531157015019	3.9101691216223	9.22315219515071e-05	0.00370610858820157	223.526327168169	155.613978505806	225.221780703377	367.348574040549	334.528157533926	406.616750862027
FBgn0260964	658.760461765166	0.766913071036404	0.196164699678442	3.90953658988363	9.24733482967051e-05	0.00370610858820157	1339.96899318365	750.040045468978	1040.41476256633	1704.8221115694	1807.17928580827	1811.19040273169
FBgn0264493	2544.65114022906	0.881170094282832	0.225536958417245	3.90698757519227	9.34539571973237e-05	0.00372933430910178	821.578149325556	529.667454789948	756.964911729887	1226.86305529012	1375.68644493118	1278.42108650527
FBgn0286028	45.7346096775069	1.42219345016921	0.364677385491032	3.89986740815927	9.62453818473224e-05	0.0037879924247591	66.5823102203056	28.9963935103986	70.3131412927616	132.935533699757	140.598790847592	168.954328613031
FBgn0019985	313.342903801743	0.838270272668306	0.214963932544179	3.89958567815104	9.63574357032636e-05	0.0037879924247591	562.382727396509	325.726153766811	480.106917889638	830.086004323672	846.016862169132	767.052651903159
FBgn0053181	344.847739419068	1.02778047941795	0.263603407829033	3.8989650698467	9.66047079804349e-05	0.0037879924247591	360.257857084868	205.87439392383	328.494206977121	580.451337986724	655.723671108167	585.70833919184
FBgn0034246	1336.12518170571	0.46318232913495	0.118816205981333	3.89830937042139	9.68666126509136e-05	0.0037879924247591	1217.5051011713	1079.63238503718	1410.65739718603	1588.12297893221	1669.00461204426	1852.86580378957
FBgn0015609	1166.97446609805	1.23629047619946	0.317211479682098	3.89736991056705	9.72430277810411e-05	0.0037879924247591	1948.7215437693	888.256187868545	1736.95431849775	3381.23052127931	3628.90327411802	3763.17607930757
FBgn0030017	57.2189264646241	0.824274346301418	0.211512706800995	3.89704410088681	9.73738927701545e-05	0.0037879924247591	84.4168576007445	71.52443732565	87.891426615952	129.891208500526	152.719376265488	148.679809179467
FBgn0000567	476.676761377676	0.629225539934512	0.161503605807516	3.89604638725181	9.77756702454489e-05	0.0037879924247591	721.704683995098	552.864569598267	727.301555247003	962.006762957019	1054.49093135694	1077.92861655114
FBgn0051774	224.863309785831	1.38288720169091	0.355346386446818	3.89165967190123	9.95608342831158e-05	0.00381595408857915	366.202706211681	160.446710757539	332.888778307918	682.94361969417	793.89834487218	762.547203140145
FBgn0051481	53.7629678952098	0.866852580874825	0.22275421932167	3.89152036497697	9.96180258862364e-05	0.00381595408857915	76.0940688232064	85.0560876305027	104.371069106443	150.186709828733	180.596722726649	154.311620133235
FBgn0264490	2093.09907726642	0.850952067180446	0.21868340858361	3.89125115934481	9.97286344939486e-05	0.00381595408857915	3590.68887259505	2022.98172057548	3087.18635988532	5295.09629652924	5547.59194577094	4847.86286900323
FBgn0033696	86.793902751447	0.697994666009045	0.179713046618305	3.88393986493104	0.000102777337512009	0.00391343023029764	137.920499742062	100.520830836049	129.639854258529	195.851587817199	193.929366686334	204.997918717144
FBgn0011656	798.594033293124	0.791986096555961	0.203955289695328	3.8831358467782	0.000103117918522577	0.00391343023029764	1099.7970884604	724.909837759966	1121.71433218609	1672.34930944427	1774.45370517996	1652.37333383544
FBgn0050463	623.602582334434	0.881439682037058	0.227410457267126	3.87598570720819	0.000106193917819049	0.00401378474748585	514.823934382006	307.361771210226	474.613703726141	756.007424475716	871.470091546713	759.168116567884
FBgn0285963	623.854209674259	0.64131484261438	0.165520800795848	3.87452718649769	0.000106831916932294	0.00402155126978327	871.514881990785	599.258799214905	867.927837832526	1178.15385210242	1191.45354657916	1275.041999933
FBgn0286778	2436.875192461	0.764167192292846	0.197446702830028	3.87024539452896	0.000108725855259856	0.00407634275083122	3000.9598392152	2130.26837656395	2864.16186484734	4248.86320306016	4940.35061633436	4388.30709517578
FBgn0243486	228.757450101336	0.83262638026984	0.215293787982609	3.86739621273744	0.00011000362134584	0.00410768542680169	436.351925908074	260.967541593588	368.045348954299	589.584313584417	665.420139442483	639.773724348009
FBgn0039580	592.938620164157	-0.369078136859215	0.095544982473693	-3.86287303952184	0.000112061255299116	0.00416778220708473	569.516546348685	595.392613413519	644.903342794548	464.766980415944	481.187241090466	456.176687255183
FBgn0067779	473.252902220663	0.586860385857866	0.152012071889806	3.86061697970464	0.000113101077216616	0.00417793292477804	387.604163068207	346.990175674437	403.20191960068	569.28881225621	569.667514641106	568.812906330536
FBgn0027339	1766.0937062283	1.12934598076339	0.292551481465104	3.86033246219641	0.000113232856210375	0.00417793292477804	3720.28658355957	1305.80425441829	2273.09202085506	5605.61746685081	5609.40693140221	4748.74299621691
FBgn0032518	8514.28221210641	-0.637612340510159	0.165237480744312	-3.85876338490537	0.000113962205882955	0.00418822367707398	8888.73841441079	10566.2857951893	8202.46738893372	6110.97544992317	5994.8415476913	5672.35999263482
FBgn0265002	296.252998204168	1.09913910677825	0.284944624248815	3.85737793676879	0.000114609881095443	0.00419544360010011	485.09968874794	272.566098997747	450.443561406754	789.495001667258	941.769486970509	854.908902781935
FBgn0261788	2103.18073245012	1.02777104393456	0.266644465505635	3.85446231552419	0.000115984246012427	0.00422910399773939	3535.99626062837	2293.61472667253	3378.32671055066	5703.03587322621	6323.30941251628	6745.78316042294
FBgn0005775	351.655418941357	1.4520135934286	0.376888713544341	3.85263219949878	0.000116854850054444	0.00424420467111805	589.729033379849	249.368984189428	470.219132395343	1120.31167331703	1253.26853221043	1206.33390629704
FBgn0267336	208.954258331852	1.2235896780573	0.318067899732936	3.84694487901695	0.000119599863229863	0.00431129104149761	304.376275292825	196.208929420364	280.153922338347	620.027565576728	652.087495482798	549.664749087726
FBgn0259214	4296.87141734732	0.71455174316124	0.185748162255427	3.84688459086148	0.0001196292846533	0.00431129104149761	5424.08034330418	3407.07623747184	5226.24395515105	7868.56586494591	7743.84202349367	7452.0122540254
FBgn0053182	155.690051594356	0.748654925244414	0.194667322075346	3.84581714723876	0.000120151342818151	0.00431338681669177	174.778564328302	150.781246254073	184.571995893499	263.841517266693	307.862869614555	284.969634260645
FBgn0266369	1073.94345172525	0.502142141265402	0.130634262787435	3.84387778941635	0.000121105331909574	0.00433091298498162	1446.97627746628	1336.73374082938	1650.1615347145	2007.22508135969	2077.46834062735	2194.15354758789
FBgn0024989	62.2637580648034	1.18218590876095	0.307891184389668	3.83962246630865	0.000123223651185873	0.00438978355833812	108.196254107997	33.8291257621317	92.2859979467496	165.408335824888	196.353483769913	166.701604231524
FBgn0259170	1126.31046376339	0.824805288842064	0.215101632974312	3.83449106097936	0.000125824547816708	0.00446533070839599	1355.42560091336	866.992165960919	1416.15061134953	2056.94905961379	2176.8571410541	2208.79625606769
FBgn0026869	1346.48777778074	0.842221129355788	0.219726742531796	3.83303879924363	0.000126569981219761	0.00447470602806591	1821.5017724555	1108.62877854757	1639.17510638751	2665.81409946001	2816.824051119	2706.64834438075
FBgn0260960	1536.84290217116	0.535559988414689	0.139788222221841	3.83122397511262	0.000127507366295628	0.00449077080233617	1801.28928542434	1531.00957734905	1928.11817138745	2427.34195885357	2501.68883025371	2694.25836028246
FBgn0039257	74.1711692351792	0.962101880870898	0.251705993411998	3.82232408465582	0.000132199785103142	0.00462433625048855	97.4955256797331	77.3237160277297	114.258854600738	166.423110891299	201.201717937072	194.860659000362
FBgn0250816	957.048206855597	0.757417212602864	0.198165344184187	3.82214769046032	0.000132294411984293	0.00462433625048855	185.479292756565	126.617584995407	198.854352718591	285.15179366131	296.954342738449	279.337823306877
FBgn0004192	241.204009618708	-1.44943957839642	0.379738889996479	-3.81693741826089	0.00013511842445239	0.00470535996463791	526.713632635631	493.905236127123	136.231711254726	149.171934762322	153.931434807278	120.520754410629
FBgn0051191	58.7452481739611	1.46355932724374	0.383664216441254	3.8146881166538	0.000136355033528893	0.00472980186455118	85.6058274261072	39.6284044642115	83.4968552851544	173.526536356171	197.565542311703	202.745194335637
FBgn0011817	367.572186861555	1.11464471070418	0.29230094232902	3.81334627874553	0.000137097811280523	0.00472980186455118	457.753382764601	208.77403327487	352.664349296508	730.638047815457	735.71953486628	737.767234943567
FBgn0039972	2203.31779866362	1.11556855462143	0.29263331635776	3.81217206744016	0.000137750924449014	0.00472980186455118	53.503642141317	31.8960328614385	72.5104269581604	109.595707172319	129.690263971486	101.372597167818
FBgn0032957	344.081407459892	0.769639639997491	0.201944065042628	3.81115255768982	0.0001383203664146	0.00472980186455118	527.902602460994	358.588733078596	451.542204239454	729.623272749047	806.018930290076	743.399045897335
FBgn0262109	5154.25405900626	0.730450802596493	0.19172037817506	3.80997997995558	0.000138978045336997	0.00472980186455118	6873.43456042119	5798.31215562938	8127.75967631016	11314.7419904755	11720.6060991053	11473.1252750155
FBgn0085397	134.453257373309	1.02552757264913	0.269208461172705	3.80941805536798	0.000139294262264234	0.00472980186455118	197.368991010191	131.450317247141	210.939423878285	332.846221782597	378.162265038351	386.342231428463
FBgn0264357	2186.37905657883	0.570661623819011	0.149877099536253	3.80753047386652	0.000140361447114001	0.00472980186455118	2760.78793449196	2035.54682442998	2720.23965376372	3479.66370272111	3948.88672915048	3732.76430015722
FBgn0052677	304.231031678917	1.14555568882139	0.300866753317157	3.80751836549319	0.000140368317635736	0.00472980186455118	517.201874032731	296.729760256413	492.191989049331	832.115554456493	1021.76535072862	1034.00049111175
FBgn0038475	255.649484804279	0.538862683659771	0.141527935220622	3.8074651680586	0.000140398506626815	0.00472980186455118	256.817482278321	249.368984189428	280.153922338347	361.259923642087	392.706967539826	388.59495580997
FBgn0263077	1795.94004799295	0.687977971089148	0.180865587127654	3.80380802127702	0.000142488623051961	0.00476112366506324	2520.61602976871	2233.68884675104	2907.00893532261	3615.6435616201	4165.84520813081	4560.64051036107
FBgn0000384	644.331819256591	0.660381742529968	0.173632370510898	3.80333310307781	0.000142762186100244	0.00476112366506324	614.697399712464	406.916055595928	619.634557642462	858.499706183162	910.25596488398	822.244399250082
FBgn0031627	487.702616313368	0.883410698716366	0.232320547226941	3.80255086887951	0.00014321384831015	0.00476112366506324	815.633300198743	616.656635321144	827.278053022648	1263.39495768089	1368.41409368044	1535.23166599707
FBgn0000464	203.602463955545	1.07768664817525	0.283432454248564	3.80226975429616	0.000143376492387364	0.00476112366506324	354.313007958055	168.179082360312	288.943064999942	552.037636127234	573.303690266475	584.581977001086
FBgn0266457	40.6390938397386	0.898044988534599	0.236432371961937	3.79831653797043	0.000145682201311385	0.00482047369321443	46.3698231891414	27.0633006097054	42.8470704752766	61.9012790510318	78.7838052163232	74.3399045897335
FBgn0004914	968.643126905881	0.592980937107074	0.156207196164836	3.79611792328273	0.000146979604546588	0.00484615731586586	1265.06389418581	1028.40542316881	1267.83382893511	1694.6743609053	1818.08781268438	1857.37125255258
FBgn0033405	102.803804888462	1.36839337001437	0.361128018958862	3.78921960682938	0.000151121276969704	0.00494859405189468	179.534443629753	67.6582515242635	146.11949674902	287.181343794131	374.526089412983	351.425003515104
FBgn0033792	78.7730988242759	1.35077299940469	0.356482462396307	3.78917097442794	0.000151150861554968	0.00494859405189468	14.2676379043512	5.79927870207973	14.2823568250922	31.4580270587211	35.149697711898	19.1481572428101
FBgn0034145	1005.77225570726	0.782990545115924	0.206744699712514	3.78723394701146	0.000152333658126298	0.00496981878336254	1697.84891061779	1017.77341221499	1535.90268011376	2585.64686921359	2265.33741460474	2461.10138679648
FBgn0038286	923.449487452232	0.563651125865348	0.148899262894645	3.78545276120114	0.00015342897863209	0.00498805120042369	914.317795703839	722.976744859273	951.424693117681	1244.1142314191	1279.9338201298	1299.82196812958
FBgn0287478	477.115388869122	0.936320791648718	0.247803859671864	3.77847541555072	0.000157791426309193	0.00511200237568945	662.256192726968	404.982962695234	557.011916178596	986.361364550867	1001.1603555182	1118.47765541826
FBgn0035688	825.495795069786	0.669419524726982	0.177260820012767	3.77646636565693	0.000159069028348255	0.00513549939438221	812.066390722655	546.098744445841	722.906983916205	1106.10482238729	1061.76328260768	1138.75217485183
FBgn0037135	3171.55459530746	-0.454744840182848	0.120499537929838	-3.77383057226018	0.000160759958929284	0.00516099899321225	3817.78210923931	4540.83522372843	3779.33134448594	2921.53741619542	3003.4810665546	2933.04714472221
FBgn0004242	1577.04523827853	1.02538139796248	0.271758702872329	3.77313177876109	0.000161211081636239	0.00516099899321225	3078.24287786377	1541.64158830286	2404.92916077899	4738.99956013637	4923.3817967493	4633.85405276005
FBgn0000633	320.55269362615	1.18257939582903	0.313503526895378	3.77214064396691	0.000161852975532719	0.00516099899321225	574.272425650135	264.833727394974	508.671631539822	965.05108815625	1020.55329218683	1071.17044340661
FBgn0002868	2640.96347984367	-0.579476199132912	0.153634173922858	-3.77179233198388	0.000162079125190146	0.00516099899321225	3374.29636437906	3382.91257621317	2600.48758499948	2329.92355247818	2064.13569666767	1867.50851226937
FBgn0085390	172.116798413026	0.950279206337073	0.252041076105607	3.77033466536581	0.000163028778870098	0.00517352077110638	311.510094245001	171.078721711352	236.208209030371	427.22030295876	522.397231511312	437.028530012373
FBgn0261258	576.646238803846	0.643452560427722	0.170751202465981	3.76836327437236	0.000164321448574915	0.00519680554030463	663.44516255233	603.124985016292	760.260840227985	1014.77506641036	1089.64062906884	1061.03318368983
FBgn0000490	136.264563542552	0.630409161438713	0.167432631500538	3.76515112848052	0.000166448377042253	0.00524622715165719	212.825598739905	174.944907512738	226.320423536076	264.856292333103	322.40757211603	362.688625422639
FBgn0083963	401.482586248265	1.27391767700187	0.338640008715245	3.76186405686364	0.00016865171229225	0.00529771493545047	721.704683995098	308.328317660572	597.661700988474	1227.87783035653	1357.50556680434	1348.25554233198
FBgn0033179	837.226220973805	-0.384807475658048	0.102318803972085	-3.76086760907637	0.000169325035017971	0.00530095682019223	733.594382248724	722.010198408926	633.916914467554	522.609159201334	524.821348594891	553.043835659987
FBgn0032297	742.181771550531	0.517642058921728	0.137685442052831	3.75959906293583	0.000170185879780561	0.00531002788657604	1253.17419593218	907.587116875477	1203.01390180584	1570.87180280323	1585.37257266078	1655.7524204077
FBgn0000723	556.015532256181	0.379661446901753	0.101182001950116	3.7522626513056	0.000175245719783389	0.00544961438978578	797.798752818304	795.467728635269	890.999337319214	998.538665347791	1041.15828739726	1192.817560008
FBgn0032910	336.147584440664	0.654718862331243	0.174632399612483	3.74912595706233	0.000177451949081422	0.0054969799697429	223.526327168169	179.777639764472	194.459781387794	325.742796317725	293.31816711308	319.886862174005
FBgn0259745	1170.88181116768	1.16033045393872	0.309551785435997	3.74842113187756	0.000177951276714628	0.0054969799697429	324.58876232399	173.011814612045	307.619993155832	617.998015443907	609.665446520163	569.93926852129
FBgn0259110	749.213309982055	1.15108922979314	0.307165210396673	3.74745964331905	0.000178634566135827	0.0054998152183143	1474.32258344962	657.251586235702	1068.97947621652	2434.44538431845	2431.38943482991	2239.20803521803
FBgn0003984	78.8799035349317	0.734553587077427	0.196325545627957	3.74150793636111	0.000182919400003943	0.00561315043312431	134.353590265974	89.8888198822358	91.1873551140502	176.570861555402	174.536430017701	171.207052994538
FBgn0036790	47.2958753096733	1.41707496620482	0.378833495989223	3.74062742922059	0.000183561451607642	0.00561432360871005	87.9837670768324	27.0633006097054	57.1294273003688	138.009409031809	180.596722726649	138.542549462685
FBgn0086779	854.012382964434	0.493950304061188	0.132134397303743	3.73824162474305	0.000185311805671031	0.00564927596435818	667.012072028418	596.359159863865	643.804699961849	922.430535367015	929.648901552614	832.381658966864
FBgn0036145	341.947077651633	-0.619394586938506	0.165730703644633	-3.73735568194194	0.000185965766433898	0.00565068528203393	656.311343600155	834.129586649134	626.226414638658	497.239782541075	449.673719003937	431.396719058605
FBgn0003091	525.968444764461	0.965940527999075	0.258669467650114	3.73426572828317	0.000188263640467103	0.00570187403603622	854.869304435709	516.135804485096	794.318768041666	1277.60180861064	1419.32055243561	1530.72621723406
FBgn0028369	235.705053841674	1.01498065712628	0.271935804471448	3.73242743484648	0.000189643339054248	0.00572501222898182	417.328408702272	216.506404877643	335.086063973317	625.10144090878	672.692490693221	657.795519400066
FBgn0003716	803.284325218173	0.832359332862828	0.223107231126447	3.73075910027804	0.000190903698724013	0.00574440967875686	1104.55296776185	635.987564328077	934.94505062719	1526.22169988118	1609.61374349657	1625.34064125735
FBgn0259246	745.205438061942	1.04574973727709	0.280502667769951	3.72812759889593	0.000192907705076412	0.00578598658645315	1397.03954480105	786.76881058215	1137.09533184388	2080.28888614123	2485.93206921044	2287.64160942043
FBgn0265597	432.918785186873	0.804467451120025	0.216340763010592	3.71851998636355	0.000200393439424941	0.00599118392210002	840.601666531358	534.500187041682	693.243627433322	1166.99132637191	1258.11676637759	1184.93302467272
FBgn0262116	1193.64482809894	-0.698425032527476	0.187864418169599	-3.71770790516039	0.000201038522405756	0.00599120570938693	967.821437845156	1566.77179601187	1005.25819191995	779.347251003154	712.690422572277	690.460022931919
FBgn0040765	322.330276968857	0.718556020284925	0.193372345112606	3.71591925343042	0.000202466238678348	0.00601447631703285	441.107805209524	337.324711170971	447.147632908656	603.791164514162	740.567769033438	671.311865689108
FBgn0265379	65.372482512289	1.27387544003111	0.342900044477311	3.71500517584622	0.000203199535154786	0.00601703591678091	108.196254107997	56.059694120104	106.568354771842	225.280064743099	218.170537522126	209.503367480158
FBgn0265974	403.311455401135	1.03391154166789	0.278506020769324	3.71234897835204	0.000205344588789916	0.00606125075101155	524.335692984906	314.127596362652	463.627275399147	802.687077530592	921.164491760086	940.512429279204
FBgn0013983	291.296925179043	-0.452124397966044	0.121926294839451	-3.70817794932085	0.000208755940027833	0.00614244534929996	274.65202965876	336.358164720624	283.449850836445	215.132314078996	232.715240023601	208.377005289404
FBgn0011666	1098.25159018848	0.986114357791928	0.266133049184446	3.7053434769332	0.000211104462774885	0.00619195361161162	1934.45390586495	869.891805311959	1410.65739718603	2655.6663487959	2933.1816711308	2757.33464296466
FBgn0032940	1447.94946033607	0.578942910382006	0.156370146502669	3.70238772125296	0.000213579889302631	0.00624486104004989	1557.55047122501	1246.84492094714	1769.91360347873	2148.27881559073	2301.69917085843	2381.12967125298
FBgn0039908	1108.7928603719	0.861246890399021	0.232791397773379	3.6996508403521	0.000215896290898914	0.00629280160745486	1765.62019066346	1128.92625400485	1622.69546389701	2762.21773076899	2693.19407985646	2748.32374543863
FBgn0032629	234.586934155309	1.06542670099098	0.288064886539349	3.69856497885052	0.000216821846167346	0.00630002976769995	428.029137130536	182.677279115511	371.341277452397	671.781093963656	678.752783402169	701.723644839454
FBgn0029831	1184.89809394625	-0.932733880261818	0.252276921072122	-3.69726202578461	0.000217937360925695	0.00631271520837108	3107.96712349783	1843.20408081101	2133.56438110224	1296.88253487244	1389.01908889087	1024.98959358572
FBgn0278598	56.3629439983486	1.00105368526559	0.27111877998707	3.6923066904968	0.000222229245692064	0.00641130734780384	70.1492196963934	41.5614973649047	53.8334988022706	109.595707172319	93.3285077177982	126.152565364396
FBgn0052220	107.246135195166	-0.712920120139237	0.193145249761289	-3.69110874339568	0.000223278648334718	0.00641130734780384	221.148387517443	282.231563501213	229.616352034175	160.334460492836	141.810849389382	145.300722607206
FBgn0051522	271.345053699376	0.651265797376706	0.176448915048382	3.69095948931242	0.000223409720444014	0.00641130734780384	425.651197479811	247.435891288735	354.861634961906	488.106806943382	521.185172969523	601.477409862389
FBgn0051183	373.756230101519	0.467802339706246	0.126829056360517	3.68844768801638	0.000225626401593933	0.00645499779083197	620.642248839277	532.567094140988	578.984772832584	754.992649409306	893.287145298926	746.778132469595
FBgn0085395	163.19336676071	0.951341076832613	0.25843530843291	3.68115751133743	0.000232177511333032	0.00659696648113384	329.34464162544	147.881606903033	248.293280190064	475.929506146457	461.794304421833	461.80849820895
FBgn0267337	46.3547322985905	1.10190474368861	0.299377032460911	3.68065891571855	0.000232632019918029	0.00659696648113384	89.1727369021949	41.5614973649047	61.5239986311664	125.832108234884	153.931434807278	130.65801412741
FBgn0034493	95.8858195784013	-0.826962277298379	0.224683482245187	-3.68056551836754	0.000232717251646795	0.00659696648113384	158.132986773226	202.97475457279	143.922211083621	88.2854307777011	96.964683343167	100.246234977065
FBgn0037899	1598.31087638765	-0.643559081884676	0.175098746639824	-3.67540655906847	0.000237470945842544	0.00671126095575676	1357.80354056409	1848.03681306274	1373.30354087425	972.154513621122	976.919184682407	983.314192527838
FBgn0033730	27.3845661149381	0.947284123754709	0.257834017447461	3.67400753838751	0.000238775682828701	0.00672768575436747	42.8029137130536	39.6284044642115	37.3538563117796	67.9899294494939	75.1476295909544	87.8562508787759
FBgn0031602	258.114624338219	1.14847104799739	0.312881357737721	3.67062792203849	0.000241955339765642	0.00679667900042579	441.107805209524	222.305683579723	364.749420456201	762.096074874178	730.871300699121	783.948084764462
FBgn0023213	4384.83641647745	0.7973320621427	0.217730515106746	3.66201339188398	0.000250240774715414	0.0070062527979787	3389.75297210877	2411.53339361482	3616.73220524643	5391.49992783823	5526.98695056052	5447.08755448411
FBgn0083949	553.405545449072	1.01974769290475	0.278537081702855	3.66108414244327	0.000251150253701586	0.0070062527979787	985.655985225595	601.191892115598	887.703408821116	1540.42855081092	1757.4848855949	1717.70234089914
FBgn0052113	661.391644887553	0.732918287315967	0.200220927403913	3.6605478599019	0.000251676536300805	0.0070062527979787	667.012072028418	491.97214322643	665.777556615837	937.65216136317	1062.97534114947	1030.62140453949
FBgn0264495	771.625160793226	0.874420303648801	0.238928488596853	3.65975739763801	0.000252454145073342	0.00700692131609531	842.979606182083	692.047258448181	880.01290899222	1364.87246432193	1567.19169453394	1494.68262712994
FBgn0027492	1002.04203777638	0.645627241940974	0.176690376970735	3.65400342118183	0.000258182824305411	0.00714459494164199	1168.75733833143	798.367367986309	1039.31611973363	1619.58100599093	1562.34346036678	1518.33623313577
FBgn0038237	448.657717385289	0.846715969173376	0.232028480940735	3.64918981385584	0.000263068676260876	0.00724239456206606	738.350261550174	505.503793531283	763.556768726083	1208.59710409474	1168.42443428516	1231.11387449362
FBgn0036732	528.476557791595	0.621617400587119	0.170353343350102	3.64898855732818	0.000263274829208252	0.00724239456206606	838.223726880633	638.887203679117	786.628268212771	1111.17869771934	1179.33296116127	1190.56483562649
FBgn0037535	117.531747769389	-0.685834803605747	0.188027065615037	-3.64753234520988	0.000264770988689	0.00726206682250832	79.6609782992942	91.821912782929	88.9900694486514	52.7683034533386	53.3305758387418	56.3181095376769
FBgn0267665	17.1407060802432	1.33481481744014	0.366205597155849	3.64498748191463	0.000267404817209975	0.00728262368201457	27.3463059833398	12.5651038545061	25.2687851520862	47.6944281212868	70.2993954237961	45.0544876301415
FBgn0013684	7406.95058575029	-0.990348276458245	0.271722731113976	-3.64470161328843	0.000267702209002558	0.00728262368201457	7977.98752818304	19752.3432592836	9938.32306459878	6044.00029554009	5439.71873555167	7477.91858441274
FBgn0052451	2303.30729181083	0.610812080366119	0.16759647016844	3.64454024450654	0.00026787021932125	0.00728262368201457	3159.09282598843	2257.85250800971	3108.0605737066	4195.08012454042	4371.89516023504	4449.13065347647
FBgn0033661	1390.25664547191	0.900785434400587	0.24732321146302	3.64213867785424	0.000270382339168631	0.00732948976556832	614.697399712464	495.838329027817	698.736841596819	978.243164019584	1179.33296116127	1219.85025258608
FBgn0085376	198.936830672701	0.83712867825389	0.229929282100514	3.64080934192599	0.000271782347044447	0.00733050553030079	258.006452103684	202.97475457279	269.167494011353	419.102102427477	429.068723793514	455.050325064429
FBgn0000635	752.289752778976	0.741365880514109	0.203638016599267	3.64060646874705	0.000271996602275088	0.00733050553030079	1064.12799369953	726.842930660659	1039.31611973363	1500.85232322092	1582.9484555772	1645.61516069092
FBgn0261574	1996.39494077193	0.828417396950613	0.227956184979344	3.63410800643852	0.000278944000203046	0.00749601535805759	1507.61373855978	1187.885587476	1571.05925076014	2298.46552541946	2659.25644068635	2617.66573131122
FBgn0011260	730.625298131897	0.558890241776817	0.153844158437832	3.63283368996205	0.000280325706921555	0.00751143637739658	473.209990494315	416.581520099394	489.994703383933	697.150470623915	673.904549235011	660.048243781573
FBgn0052791	108.712431695142	0.756477603498122	0.208381075087302	3.63026058475412	0.000283135226232283	0.00751760811458708	139.109469567424	91.821912782929	127.44256859313	205.999338481302	197.565542311703	199.366107763376
FBgn0000500	127.729480709981	-0.540236532685774	0.148816882216728	-3.63020999122268	0.000283190731811131	0.00751760811458708	301.9983356421	338.291257621317	287.844422167243	252.678991536179	198.777600853492	185.849761474334
FBgn0033652	308.703765680833	1.19535055355518	0.329347316901282	3.62945283660373	0.00028402261634958	0.00751760811458708	558.815817920422	258.067902242548	435.062561748963	906.194134304449	1016.91711656146	941.638791469957
FBgn0011722	1212.77845731152	0.850792775874173	0.234428878442633	3.62921488822619	0.000284284522323629	0.00751760811458708	1958.2333023722	1394.72652785017	2195.0883797334	2999.67509630902	3279.83041408262	3724.87976482195
FBgn0051363	700.293227758494	0.372506905592246	0.102649245841712	3.62892978450774	0.000284598629418655	0.00751760811458708	494.611447350841	443.644820709099	489.994703383933	579.436562920314	625.422207563427	643.15281092027
FBgn0266406	95.453192046938	0.850071037014177	0.234443850469237	3.62590460493107	0.000287951648854872	0.00758463011629633	104.629344631909	117.918666942288	146.11949674902	212.087988879765	225.442888772863	227.525162532215
FBgn0263974	269.699992009608	1.08292838964749	0.298823587429012	3.62397225387955	0.000290112741460214	0.00761772160321675	73.7161291724812	28.029847060052	69.2144984600622	104.521831840267	135.750556680434	119.394392219875
FBgn0004168	250.49298846634	0.895024296160242	0.247017789521337	3.62331918642213	0.000290846544325871	0.00761772160321675	458.942352589963	307.361771210226	401.004633935281	678.884519428529	750.264237367755	740.019959325074
FBgn0259176	2814.06365138187	0.855090702529237	0.236089401439095	3.62189364417458	0.000292454363320217	0.00763831648918927	3969.97024688572	2314.87874858016	3399.20092437194	5675.63694643313	6004.53801602562	5834.55614810332
FBgn0085391	239.928129850964	1.49088471052439	0.41189431772082	3.61958067004679	0.000295080810479476	0.00768532598273998	410.194589750097	156.580524956153	317.507778650127	837.189429788545	913.892140509349	732.135423989799
FBgn0264895	734.361847637097	0.931930708918144	0.257730832268773	3.61590695499826	0.000299297873851008	0.00777338444432032	871.514881990785	535.466733492028	839.363124182342	1397.34526644706	1473.86318681614	1412.45818720494
FBgn0266411	2456.91619733536	0.757461093810787	0.209524951511063	3.61513551654869	0.000300190550313266	0.00777353637806096	3409.96545913993	2302.31364472565	3309.11221209059	4724.79270920662	5038.52735821931	5485.38386896973
FBgn0020294	213.575097022867	0.714387175689532	0.197647072257411	3.61445867894835	0.000300975811583345	0.00777353637806096	366.202706211681	234.870787434229	336.184706806016	512.46140853723	472.702831297939	549.664749087726
FBgn0005631	164.28342185269	0.783714163195178	0.216888185951688	3.61344791444634	0.000302152074274767	0.00777784348271361	260.384391754409	164.312896558926	273.562065342151	405.910026564143	391.494908998037	402.111302099013
FBgn0259677	247.912740467659	1.24365275603173	0.344227588359191	3.61287938006299	0.000302815588378396	0.00777784348271361	472.021020668952	185.576918466551	355.960277794606	797.613202198541	802.382754664707	797.464431053505
FBgn0030258	371.189478952018	-0.670766735890566	0.18584466783344	-3.60928695835239	0.000307039814676574	0.00786461762221153	743.106140851625	989.74356515494	680.059913440929	528.697809599796	527.245465678471	460.682136018197
FBgn0032938	1082.62291074923	0.437115874190755	0.121155274110759	3.60789802506779	0.000308687762941628	0.00788510664788807	1060.56108422344	818.664843443588	1060.19033355492	1336.45876246244	1327.2041032596	1312.21195222787
FBgn0015774	353.353039978374	1.41089160364991	0.391182504170986	3.60673493473319	0.000310074119402745	0.00789881962248418	614.697399712464	233.904240983882	469.120489562644	1152.78447544217	1198.7258978299	1150.01579675936
FBgn0036116	846.775241958076	-0.328507349633535	0.0911248189225722	-3.60502608968326	0.000312121571182075	0.00791908030110192	1483.83434205252	1589.00236436985	1499.64746663468	1211.64142929397	1231.45147845822	1199.57573315252
FBgn0036146	118.480910538069	-0.650397169345339	0.180432779011416	-3.60465084508945	0.000312572861960035	0.00791908030110192	216.392508215993	279.331924150174	231.813637699573	149.171934762322	161.203786058015	154.311620133235
FBgn0004858	275.603655466277	0.695486460558232	0.193294595912031	3.59806469123818	0.000320593886943672	0.00810022271957138	414.950469051547	263.867180944628	390.018205608287	491.151132142613	636.330734439533	601.477409862389
FBgn0003090	118.756596935398	0.710475317476724	0.197511560065968	3.59713283232347	0.000321744197641871	0.00810725623217917	170.022685026852	164.312896558926	179.078781730002	243.546015938486	286.045815862343	310.875964647976
FBgn0032596	969.798448518667	-0.617851457259178	0.172162516817326	-3.58876873248055	0.000332243404290034	0.00834918695429388	482.721749097215	662.084318487436	459.232704068349	363.289473774908	339.376391701084	343.540468179829
FBgn0034128	185.145927121592	-0.70495174847759	0.196565137878962	-3.5863518632265	0.000335336416298148	0.0084041994575207	367.391676037043	513.236165134056	335.086063973317	256.73809180182	236.35141564897	253.431492919546
FBgn0005626	191.605866631749	0.622696145479621	0.17376640340066	3.58352439420551	0.000338989089024832	0.0084729047036368	284.163788261661	269.666459646707	286.745779334543	426.20552789235	418.160196917408	449.418514110661
FBgn0031216	856.041033142841	0.705684713131939	0.196976678772884	3.58258001672168	0.000340217355120922	0.00848080688448882	778.775235612503	627.288646274957	776.740482718476	1122.34122344985	1213.27060033138	1223.22933915834
FBgn0259145	348.960137732496	1.27178397069571	0.355454709038919	3.57790722236983	0.000346356342126365	0.0086107520563929	646.799584997254	270.633006097054	508.671631539822	1065.51381973087	1230.23941991643	1145.51034799635
FBgn0265177	234.381733912393	-0.656578046124206	0.183580311697308	-3.57651667574673	0.000348203113916192	0.00861790979819615	235.416025421795	282.231563501213	213.136709543684	172.511761289761	151.507317723698	139.668911653439
FBgn0267348	428.225390849494	0.566329727909537	0.158370106721779	3.57598880011145	0.000348906589350837	0.00861790979819615	603.9966712842	520.001990286482	565.801058840191	781.376801135975	843.592745085553	876.309784406252
FBgn0052698	439.327295095287	0.818734391252536	0.229015214170159	3.5750218352053	0.000350198667863048	0.00861790979819615	649.177524647979	521.935083187175	694.342270266021	1113.20824785216	1064.18739969126	1111.71948227374
FBgn0031011	487.426284865956	0.576738279680297	0.16132956508031	3.57490754650702	0.000350351678180054	0.00861790979819615	643.232675521166	484.239771623657	651.495199790744	874.736107245728	855.713330503449	920.23790984564
FBgn0285955	1652.03089237934	0.57595262787213	0.161207490789735	3.57274109937826	0.000353263982530492	0.00864819719323975	2445.71093077087	2058.7439392383	2636.74279847856	3354.84636955264	3621.63092286729	3667.43529309352
FBgn0261611	107.126822765791	0.796064306979137	0.222824400337387	3.57260832195122	0.000353443206434836	0.00864819719323975	184.290322931203	116.952120491941	162.599139239511	255.72331673541	290.894050029501	256.810579491807
FBgn0026576	839.65914527045	0.678177245292712	0.189957253148094	3.57015714879806	0.000356767131375714	0.00870009020058306	1073.63975230243	758.738963522098	869.026480665226	1454.17267016604	1458.10642577287	1407.95273844192
FBgn0039135	557.918350355487	-0.491262030299136	0.137621252009065	-3.56966691646415	0.000357435411553316	0.00870009020058306	602.807701458838	668.850143639862	524.052631197614	466.796530548764	386.646674830878	423.51218372333
FBgn0264953	833.759856120492	0.565303475307585	0.158403544549149	3.56875521262206	0.00035868135177755	0.00870762195516362	1090.2853298575	976.211914850088	1315.07547074118	1592.18207919785	1672.64078766963	1737.97686033271
FBgn0034731	85.186804171435	0.905235918828773	0.25380918439678	3.56660032212867	0.000361642401308527	0.00875664335251741	164.077835900039	96.6546450346621	131.837139923928	239.486915672844	259.380527942972	234.283335676736
FBgn0035142	1452.7854163283	0.763979597444527	0.214383677749763	3.56360897183728	0.000365790738628823	0.00883408386433973	2425.4984437397	1383.12797044602	2043.47566882088	3101.15260295005	3477.39595639433	3356.55932844554
FBgn0027589	167.245308664757	0.814633912013938	0.228676411057945	3.56238716641182	0.000367497873848085	0.00885231925139766	288.919667563112	210.707126175563	302.126778992335	489.121582009792	464.218421505412	455.050325064429
FBgn0037819	650.947060279316	0.564284309387359	0.158460886761473	3.56103213177621	0.000369399870156973	0.00886002860346858	733.594382248724	588.626788261092	640.50877146375	969.110188421891	877.530384255661	1053.14864835456
FBgn0004102	163.624683277352	0.583850722217446	0.163966070387953	3.56080206615932	0.000369723714577953	0.00886002860346858	316.265973546451	242.603159037002	250.490565855463	395.762275900039	450.885777545727	364.941349804146
FBgn0262733	811.246217855694	0.768062928861249	0.215768559715048	3.55966100842302	0.000371333814002159	0.0088757372817277	436.351925908074	271.599552547401	419.681562091171	639.308291838525	688.449251736486	590.213787954854
FBgn0002945	249.240347038953	0.710507209362786	0.199639650776059	3.55894836822661	0.000372342713995445	0.00887703219161449	394.737982020383	293.830120905373	439.45713307976	540.87511039672	627.846324647006	675.817314452122
FBgn0030174	279.242219364615	0.647392064673322	0.182015113939541	3.55680388656275	0.000375394181933445	0.00891353829313002	282.974818436299	205.87439392383	294.436279163439	385.614525235936	416.948138375618	422.385821532577
FBgn0265416	129.10660917278	0.724913379094344	0.203861513300154	3.55591090912301	0.000376671715580391	0.00891353829313002	233.038085771069	148.84815335338	216.432638041782	329.801896583366	332.104040450347	324.392310937019
FBgn0086758	359.591412552777	1.32659014499838	0.373071916675214	3.55585635290064	0.00037674989774146	0.00891353829313002	727.649533121911	259.034448692895	441.654418745159	1146.6958250437	1357.50556680434	1075.67589216963
FBgn0264386	847.579117678708	0.962014297382523	0.270604974469304	3.5550503063337	0.000377906777235698	0.00891821628105969	1739.46285450548	866.025619510573	1305.18768524689	2359.35202940408	2524.71794254771	2731.42831257733
FBgn0263220	587.375658740931	0.933117807517835	0.262548407626308	3.55407909708585	0.000379305117401875	0.00892855438380414	1084.34048073069	636.954110778423	1012.94869174885	1727.14716303043	1764.75723684564	1726.71323842517
FBgn0260429	297.561844993112	1.11929001123361	0.315184212677303	3.55122485903056	0.000383442671266309	0.00900315645816702	443.48574486025	234.870787434229	458.13406123565	807.760952862644	813.291281540813	845.898005255907
FBgn0026403	523.094059982234	0.778304936145703	0.219243917390391	3.54994996171244	0.000385304380248662	0.00902408092582383	770.452446834964	602.158438565945	880.01290899222	1256.29153221602	1233.8755955418	1371.90914833781
FBgn0044020	229.885254125075	0.484660871488377	0.136580085127567	3.54854714752666	0.00038736264356668	0.00904949211025877	212.825598739905	196.208929420364	247.194637357365	313.5654955208	292.106108571291	310.875964647976
FBgn0262975	2956.86873948863	0.55449825162322	0.15647614323267	3.54366001211262	0.000394613767432139	0.00918017141115323	3763.08949727263	2912.20445489437	3918.85898423876	4843.52139197663	5318.51288137271	5395.27489370944
FBgn0259984	821.145182825536	0.860320070079501	0.242791778574707	3.54344811480007	0.000394931013600913	0.00918017141115323	952.364830115442	563.49658055208	821.784838859151	1405.46346697834	1464.16671848182	1371.90914833781
FBgn0037720	875.445183470655	0.62848937474621	0.17747666463931	3.54125076681774	0.000398234893946055	0.00923388539628534	1225.82788994884	962.680264545235	1144.78583167278	1697.71868610453	1673.85284621142	1779.65226139059
FBgn0031150	450.622584998671	0.580131921013952	0.163921970631	3.53907361399327	0.000401533863014711	0.00928721855301189	608.752550585651	426.24698460286	596.563058155774	779.347251003154	849.653037794501	807.601690770286
FBgn0085412	886.411343796459	0.680904200481857	0.192447540870663	3.53812887086703	0.000402973329812677	0.00929738466649695	1616.99896249313	975.245368399741	1515.02846629247	2182.78116784868	2199.8862533481	2198.6589963509
FBgn0013433	73.9963363932425	1.10230539040216	0.312214602261356	3.53060165161466	0.000414615662677985	0.00954231789995026	133.164620440611	71.52443732565	116.456140266136	227.30961487592	215.746420438547	244.420595393518
FBgn0036734	220.780484884261	0.532814965750146	0.150945604059191	3.52984751739582	0.0004157992340709	0.00954592908244748	267.518210706585	212.640219076257	259.279708517059	350.097397911573	370.889913787614	346.91955475209
FBgn0267698	682.358366367748	0.437437208453205	0.123991677891306	3.52795619748507	0.000418781449403261	0.00959071408017615	650.366494473342	531.600547690642	648.199271292646	862.558806448803	804.806871748286	807.601690770286
FBgn0032414	39.5483826165765	0.788533405099481	0.223735231346116	3.52440427176008	0.000424436145273782	0.00969633238023495	59.44849126813	50.2604154180243	81.2995696197556	99.447956508215	112.721444386432	117.141667838368
FBgn0287185	42.8040518178386	1.76384290576113	0.500678119171557	3.52290790873718	0.00042683964617359	0.00972734076010305	2.3779396507252	4.83273225173311	7.6904998288958	16.2364010625657	14.544702501475	20.2745194335637
FBgn0051344	292.524734999131	-0.463086934576711	0.131495344178135	-3.52169833442448	0.000428791780834188	0.00974793637700802	326.966701974715	402.083323344194	319.705064315526	251.664216469769	267.864937735499	243.294233202764
FBgn0032138	1910.87730912339	-0.387867545171326	0.110202277272495	-3.51959646180681	0.000432203838884458	0.00980153974133582	1680.01436323735	2021.04862767479	1799.57695996162	1409.52256724399	1322.35586909244	1473.28174550563
FBgn0039584	159.860320209628	1.23323097791801	0.350727554945442	3.51620783861664	0.000437758154978096	0.00988651823559915	287.730697737749	146.915060452686	221.925852205279	460.707880150302	572.091631724685	509.115710220599
FBgn0036745	274.171602280536	-0.631037043029151	0.179475113599775	-3.51601417250721	0.000438077598738099	0.00988651823559915	318.643913197177	383.718940787609	297.732207661538	229.339165008741	206.04995210423	210.629729670912
FBgn0259994	538.796227861272	0.865558688403874	0.246341961449855	3.51364697800405	0.000441999808034086	0.00995088187675771	1085.52945055605	588.626788261092	848.152266843937	1487.66024735758	1595.0690409951	1510.45169780049
FBgn0033033	198.920061148199	0.592541955635833	0.168776453194009	3.51080938378712	0.000446744615801469	0.01003340926986	386.415193242845	284.164656401907	355.960277794606	488.106806943382	509.064587551627	548.538386896973
FBgn0037891	1262.70001594875	-0.340355440707814	0.0970573113645295	-3.50674705411426	0.000453620127223089	0.0101632769708922	1543.28283332065	1704.02139196109	1476.57596714799	1195.4050282314	1208.42236616422	1329.10738508917
FBgn0004191	2787.10983500199	-1.06892605054432	0.305039239421167	-3.50422474358605	0.00045793870695714	0.0102353704261719	2940.32237812171	4805.6689511234	1876.48195825058	1676.40840970991	1516.28523577877	1394.43639215288
FBgn0020236	4443.52439614721	0.59807548364572	0.170756765456411	3.5024994883637	0.000460914668698601	0.0102771812699271	6122.00563079202	5113.99726878397	5988.70208104443	8476.41612972571	7868.684053298	9726.1375171568
FBgn0000024	840.90431262064	0.887280294325407	0.25353137766663	3.49968632084702	0.000465805943444737	0.010361396320931	1527.82622559094	900.821291723051	1388.68454053204	2346.15995354075	2499.26471317013	2213.3017048307
FBgn0265082	1385.77120067734	0.551836742989097	0.157729786526912	3.49862099696016	0.000467670839217811	0.0103780512244563	2423.12050408898	1625.73112948302	2291.76894901095	2941.83291752362	3230.13601386925	3120.0232683873
FBgn0000153	756.635428072264	-0.553495452026866	0.158234434902178	-3.49794564229362	0.000468856682027434	0.0103795938797407	1393.47263532497	1545.50777410425	1282.1161857602	988.390914683688	959.950365097353	928.122445180915
FBgn0003655	975.167828944956	-2.32211520723451	0.664002214457325	-3.49714979359267	0.000470257698489829	0.0103858814265046	3.5669094760878	6.76582515242635	23.0714994866874	1.01477506641036	3.63617562536876	2.25272438150707
FBgn0022710	397.779433998237	0.520502954789855	0.148956141469979	3.49433698841319	0.000475240732613248	0.0104710623977203	609.941520411013	553.831116048614	584.477986996081	773.258600604692	872.682150088503	861.667075926456
FBgn0003165	2247.33777424482	1.13982445507172	0.326886155939803	3.48691565659828	0.000488625429914952	0.0107405183152464	3172.17149406742	1519.41101994489	2432.39523159647	4907.45222116049	5386.38815971293	5402.03306685397
FBgn0264975	838.228146913162	0.608081687840873	0.174525328659774	3.48420308106848	0.000493604802276284	0.010799546304925	1224.63892012348	891.155827219585	1103.0374040302	1571.88657786964	1695.66989996363	1636.60426316489
FBgn0004618	88.1673770394426	0.546669606477467	0.156900175312535	3.48418735280912	0.000493633811528621	0.010799546304925	142.676379043512	159.480164307192	148.316782414419	209.043663680534	219.382596063915	230.904249104475
FBgn0261649	215.266545597014	1.02421103735172	0.29416112126704	3.4818028736773	0.000498050189033729	0.0108705883982057	420.89531817836	199.108568771404	340.579278136814	643.367392104166	621.786031938058	685.954574168904
FBgn0032986	622.117011317509	0.518902611969113	0.14911035656896	3.47999041722586	0.00050143171744657	0.0109121793654993	727.649533121911	606.991170817678	682.257199106328	1011.73074121113	930.860960094403	945.017878042218
FBgn0263413	473.175129273792	0.811166541307226	0.233125634087016	3.47952529752457	0.000502302943475337	0.0109121793654993	825.145058801644	485.206318074004	734.992055075899	1129.44464891473	1249.63235658506	1207.46026848779
FBgn0051108	299.80067512783	0.491605111923261	0.141347794281087	3.47798219578613	0.000505203479974362	0.0109189614401557	146.2432885196	167.212535909965	193.361138555094	218.176639278227	249.684059608655	246.673319775025
FBgn0266095	111.680774550389	-0.534101435204466	0.153580027711532	-3.47767508030188	0.000505782618558153	0.0109189614401557	230.660146120344	312.194503461959	248.293280190064	192.807262617968	169.688195850542	184.72339928358
FBgn0038652	461.476621247731	0.641920005136513	0.184610744154801	3.47715409563728	0.00050676647357958	0.0109189614401557	708.626015916109	502.604154180243	665.777556615837	869.662231913676	980.555360307776	1076.80225436038
FBgn0028888	205.801888317433	1.08038568885631	0.310735553758029	3.47686537890547	0.000507312469579184	0.0109189614401557	404.249740623284	192.342743618978	338.381992471415	599.732064248521	700.569837154382	674.690952261369
FBgn0040022	742.005801156985	0.635506267629965	0.182844463984308	3.47566589538367	0.000509586705794467	0.010942580116575	720.515714169735	556.730755399654	693.243627433322	1081.75022079344	1026.61358489578	950.649688995986
FBgn0052296	400.346620852342	0.650135348481855	0.187181002937599	3.47329770798692	0.000514104751207396	0.0110141612366967	501.745266303017	364.388011780676	482.304203555037	696.135695557505	662.996022358904	754.66266780487
FBgn0037874	9942.59919128735	-0.44479786670195	0.128141412692619	-3.47114845509715	0.000518237405056045	0.0110771756142784	9283.47639643118	11553.1297209932	9130.82058256472	7593.5618219487	7315.98535824195	7108.47178584558
FBgn0259977	68.8799977625819	0.721764276541091	0.207981750224332	3.47032504420501	0.000519828874080147	0.0110857084201771	87.9837670768324	63.792065722877	98.877854942946	139.024184098219	121.205854178959	150.932533560974
FBgn0051373	105.497225960227	-3.11940285586514	0.899224114380665	-3.46899377583264	0.000522411556824116	0.0111152921175072	5.944849126813	12.5651038545061	9.8877854942946	2.02955013282071	0	1.12636219075354
FBgn0033092	132.329690024238	0.55472408643721	0.159987796677214	3.46728999310119	0.000525734371142391	0.0111422562465532	137.920499742062	93.7550056836223	138.428996920124	186.718612219506	192.717308144544	161.069793277756
FBgn0000547	919.198202390261	0.838869133461261	0.241950146893361	3.46711561961147	0.000526075553047629	0.0111422562465532	939.286162036453	670.783236540555	896.492551482711	1383.13841551732	1614.46197766373	1484.54536741316
FBgn0038871	122.553812747806	-0.613792538922718	0.17708769788662	-3.46603714570673	0.000528190300806675	0.0111616214020465	124.841831663073	146.915060452686	137.330354087425	103.507056773856	78.7838052163232	84.4771643065153
FBgn0027279	1506.32127888309	0.407739585386426	0.117676047836792	3.46493269345629	0.000530364197205867	0.0111644870188288	2181.75962954037	1826.77279115511	2070.94173963837	2523.74559016256	2724.70760194299	2814.77911469309
FBgn0039883	560.627654548178	1.26321960798308	0.364591997700019	3.46474858458753	0.000530727388935504	0.0111644870188288	1027.26992911329	433.979356205633	864.631909334428	1782.959791683	1890.81132519176	1906.93118894574
FBgn0036454	2082.47373610834	0.665529703433023	0.19222734934451	3.46220090794811	0.00053577704463718	0.0112452707924074	3759.52258779654	2752.72429058718	3499.17742214759	5112.43678457538	5169.42968073259	5595.76736366357
FBgn0031530	234.065668380647	0.789644779245565	0.228116496782168	3.46158559501118	0.000537003327286962	0.0112456237322391	357.879917434142	263.867180944628	379.031777281293	540.87511039672	581.788100059002	605.982858625403
FBgn0010215	1620.15233169266	0.457904774148769	0.132450690879905	3.45717165464963	0.000545877014377774	0.0114057628756956	1388.71675602352	1069.96692053371	1298.59582825069	1727.14716303043	1764.75723684564	1665.88968012448
FBgn0015903	397.771338714348	0.711146215684864	0.205801557797551	3.4554948140112	0.000549283758205825	0.0114512116228649	147.432258344962	102.453923736742	129.639854258529	168.452661024119	204.83789356244	246.673319775025
FBgn0000536	2062.33214932545	0.424663620735571	0.122946238039749	3.45405949386004	0.000552215539532268	0.0114865773748793	2892.7635851072	2488.85710964255	2871.85236467623	3646.08681361241	3608.2982789076	3821.74691322675
FBgn0040752	1414.6468705033	0.961056343458731	0.278293719421823	3.45338854737865	0.000553591006685661	0.0114894847771502	1718.06139764896	1020.67305156603	1719.37603317456	2642.47427293257	2956.2107834248	3078.34786732942
FBgn0267228	49.5400458847031	0.968466390910904	0.280579300611927	3.45166727837276	0.000557134285767518	0.0115256685745935	60.6374610934926	27.0633006097054	58.2280701330682	74.0785798479561	113.933502928221	95.7407862140507
FBgn0011761	9359.91052444138	-3.01264314532374	0.873242679938259	-3.44994949804417	0.00056069143324099	0.0115256685745935	3.5669094760878	4.83273225173311	90.0887122813508	5.07387533205179	4.84823416715835	2.25272438150707
FBgn0038049	489.286469126719	-0.469333523999777	0.136044560748743	-3.44985144144482	0.000560895123838064	0.0115256685745935	372.147555338494	388.551673039342	291.140350665341	261.811967133872	238.775532732549	259.063303873314
FBgn0034753	4091.03966542933	-0.445558966008092	0.129162135449065	-3.4496097827664	0.000561397409806452	0.0115256685745935	2855.90552052096	3507.59706830789	2663.11022646335	2279.18479915766	2136.85920917504	2213.3017048307
FBgn0086904	4496.00095840093	-0.384501486687916	0.111476128739448	-3.44918226920678	0.000562287020143721	0.0115256685745935	3263.72217062033	3929.01132065902	3268.46242728072	2741.92222944078	2656.83232360278	2616.53936912047
FBgn0065098	16738.0136621251	-0.757855138995935	0.219735064079427	-3.44894949821024	0.000562771943736875	0.0115256685745935	14961.996282363	23598.2315852128	15961.0830734569	12185.4189974556	10616.420767535	9441.16788289615
FBgn0053120	388.442440844474	0.598007192210191	0.173496820849449	3.44679049035202	0.000567288325071533	0.011578482149978	560.004787745784	480.373585822271	647.100628459947	812.834828194696	827.835984042288	912.353374510365
FBgn0000079	2682.91167810939	-0.470261786440771	0.136448765528887	-3.44643489164594	0.000568035423788582	0.011578482149978	1218.69407099666	1261.34311770234	1496.35153813658	927.504410699066	887.226852589978	1055.40137273606
FBgn0286198	505.79535649356	0.697698453783618	0.202469978304822	3.4459353412545	0.00056908650704882	0.011578482149978	588.540063554487	627.288646274957	788.825553878169	872.706557112907	1142.97120490758	1236.74568544738
FBgn0264006	515.159459663887	1.14560973270933	0.332708574019047	3.44328286725712	0.000574697871790176	0.0116422828922333	1001.11259295531	480.373585822271	675.665342110131	1535.35467547887	1706.57842683974	1528.47349285255
FBgn0032515	657.41139337015	-0.342661624415262	0.0995163576290903	-3.44326935369162	0.000574726591475058	0.0116422828922333	1065.31696352489	1264.24275705338	982.186692433264	842.263305120596	907.831847800401	865.046162498717
FBgn0052425	692.793385705456	0.405255712975462	0.117729816249328	3.44225214891368	0.000576892244730537	0.0116607480250099	779.964205437865	733.608755813086	796.516053707065	866.617906714445	1170.84855136874	1023.86323139497
FBgn0002973	595.678994848143	0.532081115721343	0.154783300678736	3.43758734558655	0.000586921391082261	0.0118268245615948	581.406244602311	488.105957425044	595.464415323075	745.859673811612	887.226852589978	773.81082504768
FBgn0259222	182.451617191399	0.840518663193124	0.244532290330134	3.43725019733946	0.000587652500264231	0.0118268245615948	376.903434639944	225.205322930763	285.647136501844	479.988606412099	532.093699845629	575.571079475058
FBgn0039594	1158.8689140187	0.451777013900855	0.131491016666529	3.43580136007767	0.000590803978122768	0.0118645688738348	2190.08241831791	1621.86494368163	1794.08374579812	2536.93766602589	2579.26057692824	2547.8312754845
FBgn0038363	128.225235726766	-0.628164805287106	0.182877238960186	-3.43489878160215	0.000592775192128102	0.0118703129007396	127.219771313798	171.078721711352	116.456140266136	101.477506641036	90.9043906342191	76.5926289712405
FBgn0267668	406.163554884931	0.914952094829	0.266400208381668	3.43450217395537	0.000593643310264995	0.0118703129007396	674.145890980594	448.477552960832	665.777556615837	1047.24786853549	1207.21030762243	1116.22493103676
FBgn0038084	57.8459171639944	1.09691753562097	0.319599308394436	3.43216492279514	0.000598783306133049	0.0119373217000692	115.330073060172	57.0262405704507	85.6941409505532	196.866362883609	179.384664184859	173.459777376045
FBgn0263239	29.9600408425836	1.07061336683667	0.31196733622001	3.4318123807732	0.000599562189065639	0.0119373217000692	46.3698231891414	29.9629399607453	43.945713307976	57.8421787853904	104.237034593905	90.108975260283
FBgn0086372	1096.97398001751	0.606220579057291	0.176700184914962	3.43078633080684	0.000601834445155551	0.0119569586988383	1309.05577772422	921.11876718033	1142.58854600738	1733.23581342889	1722.335187883	1676.02693984126
FBgn0052206	386.013230837073	1.25447354175244	0.365747719915175	3.42988752477632	0.000603831494054851	0.011971055931177	705.059106440021	291.89702800468	581.182058497983	1219.75962982525	1272.66146887907	1270.53655116999
FBgn0038532	363.86865441057	0.586105780590871	0.171013611553597	3.42724637686036	0.000609735582238862	0.0120524827457856	281.785848610936	241.636612586655	296.633564828838	380.540649903884	402.403435874143	447.165789729154
FBgn0030411	178.980045695271	-0.591383971025409	0.172590470872691	-3.42651577479984	0.00061137824878967	0.0120524827457856	123.65286183771	168.179082360312	120.850711596934	101.477506641036	93.3285077177982	79.9717155435012
FBgn0041092	1206.49144184102	0.82701454842978	0.241371338130811	3.42631629270572	0.00061182747429671	0.0120524827457856	1888.08408267581	1109.59532499792	1698.50181935327	2594.77984481128	2881.06315383385	2853.07542917871
FBgn0020269	189.150699790836	0.97966048712877	0.286090752992877	3.42429972615425	0.000616385978770192	0.0121166106355291	378.092404465307	170.112175261005	295.534921996139	537.830785197489	579.363982975423	544.032938133959
FBgn0083987	4623.10329196025	-0.855514210048861	0.250809462713615	-3.41101249048855	0.000647221265424513	0.0126959141896986	7495.26577908583	8989.84853467393	4687.90896712834	4152.45957175118	4087.06140291449	3462.43737437637
FBgn0036835	119.454908445517	0.946405388924911	0.277511996956286	3.4103224340027	0.000648861199506446	0.0127012872273914	134.353590265974	107.286655988475	188.966567224297	297.329094458235	231.503181481811	299.612342740441
FBgn0262730	393.767826709175	0.976735078306737	0.286632410996726	3.4076225884933	0.000655314649777526	0.0127795677206122	586.162123903761	298.662853157106	444.950347243257	873.721332179317	886.014794048188	854.908902781935
FBgn0040726	216.725455119698	1.29274808974057	0.379383154423678	3.4074999763877	0.00065560914204474	0.0127795677206122	385.226223417482	162.379803658232	328.494206977121	632.204866373652	742.991886117017	769.305376284666
FBgn0039936	2757.58940316232	0.630880348142434	0.185429495588355	3.40226535234158	0.000668297159847912	0.0129996380591337	1820.31280263014	1386.02760979705	1889.66567224297	2595.79461987769	2639.86350401772	2653.70932141533
FBgn0037989	357.664879882789	0.735797257497654	0.216343943478711	3.40105318256834	0.000671267669809703	0.0130301603212748	549.304059317521	418.514613000087	598.760343821173	835.159879655724	867.833915921345	904.468839175091
FBgn0038466	303.5291973845	-0.702327966974269	0.206600986205489	-3.39944150254791	0.000675236221442103	0.0130798883061847	122.463892012348	207.807486824524	162.599139239511	95.3888562425736	105.449093135694	103.625321549325
FBgn0038321	452.450208253689	-0.522015519099729	0.153659170842739	-3.39722983169018	0.000680717682584108	0.0131586549119897	694.358378011758	851.527422755373	688.849056102524	515.505733736461	507.852529009837	533.895678417177
FBgn0051523	1397.79821062708	0.396592595565203	0.116772614925675	3.39628084733421	0.000683082327662793	0.0131769698809308	1364.93735951626	1011.97413351291	1363.41575537996	1657.12768344811	1556.28316765783	1705.31235680086
FBgn0031080	61.5704755840869	-0.730009830897974	0.215116427957214	-3.3935568651371	0.000689912329980883	0.0132811694496113	116.519042885535	165.279443009272	103.272426273744	81.1820053128286	73.9355710491648	77.7189911619941
FBgn0263352	1876.14069031149	0.881563662369982	0.259832283113921	3.39281805865312	0.000691775695618809	0.0132895256567432	1876.19438442218	953.981346492115	1340.34425589327	2878.91686340618	2613.19821609835	2188.52173663412
FBgn0086913	84.0774539040598	1.10961871146738	0.327316395864399	3.39004927796858	0.000698800610894753	0.0133968001651534	124.841831663073	80.2233553787696	142.823568250922	222.235739543868	258.168469401182	269.200563590095
FBgn0036887	473.967795166755	-0.565325400890151	0.166819106650465	-3.38885282532218	0.000701856701096016	0.0134111531523216	305.565245118188	423.34734525182	293.33763633074	239.486915672844	216.958478980336	235.409697867489
FBgn0086778	405.748513514324	1.1151715226387	0.329092404791907	3.3886273472153	0.00070243402722958	0.0134111531523216	808.499481246567	363.42146533033	596.563058155774	1339.50308766167	1302.96293242381	1186.05938686348
FBgn0263929	1242.98542362154	0.71534310169672	0.211394020746722	3.3839325216951	0.000714555622450081	0.0136146274129936	1569.44016947863	1055.46872377851	1490.85832397309	2051.87518428174	2361.09003940612	2342.83335676736
FBgn0000568	1217.86061307784	0.692648777585971	0.204760649641093	3.38272406734426	0.000717707037375978	0.013646707635014	1993.90239713308	1249.74456029818	1674.33167703389	2653.63679866308	2670.16496756246	2622.17118007424
FBgn0026262	1045.7972409491	0.73042938352033	0.216035300760442	3.38106495072438	0.000722054729648794	0.0137013568903561	973.766286971969	645.653028831543	900.887122813508	1397.34526644706	1432.65319639529	1349.38190452274
FBgn0052666	964.148531555093	0.826082346862936	0.244367445272576	3.38049262634593	0.000723560164971022	0.0137019601097771	1222.26098047275	830.263400847748	1285.4121142583	1867.18612219506	1986.56394999313	2062.36917126973
FBgn0039620	1104.71184780815	0.518394993730533	0.153481991931456	3.37756232641314	0.000731313779259535	0.013815355704996	1865.49365599392	1429.52220006265	1638.07646355481	2355.29292913844	2226.55154126747	2481.37590623004
FBgn0052683	107.735178791038	1.12594356401822	0.333404558809991	3.37710908344208	0.000732519935745645	0.013815355704996	222.337357342806	84.089541180156	172.486924733806	349.082622845163	345.436684410032	348.045916942843
FBgn0024177	687.789017322531	-4.26955599185779	1.26522580404698	-3.3745407169227	0.000739389770183765	0.0139166924760499	0	0	12.0850711596934	0	0	0
FBgn0026411	92.045879519257	0.964805703970987	0.285967416842185	3.37383088823517	0.000741298938300029	0.0139244394511387	162.888866074676	113.085934690555	134.034425589327	263.841517266693	255.744352317603	279.337823306877
FBgn0039617	82.3833924342746	1.13305688461756	0.336073867428256	3.37145191706831	0.000747730899302271	0.0140169393179688	155.755047122501	63.792065722877	126.343925760431	229.339165008741	270.289054819078	256.810579491807
FBgn0038425	75.3595350139669	-0.8340385858098	0.247672938545997	-3.36749985971885	0.000758530650257398	0.0141907806561233	47.558793014504	48.3273225173311	40.6497848098778	27.3989267930796	25.4532293775813	23.6536060058243
FBgn0037326	277.438650967083	1.0547979030253	0.313619065601587	3.36330924589032	0.000770140394909157	0.0143738153344591	472.021020668952	234.870787434229	464.725918231846	786.450676468027	826.623925500499	818.865312677822
FBgn0031645	2135.24709235934	0.509588364050174	0.151534402257283	3.36285593541305	0.000771406092911927	0.0143738153344591	2934.37752899489	2447.29561227764	3273.95564144421	3802.36217383961	4079.78905166375	4438.99339375969
FBgn0262473	2273.49322685097	0.745992249319864	0.222116876077402	3.35855727171268	0.000783504836623913	0.0145697155455847	1482.64537222716	957.847532293502	1443.61668216701	2012.29895669174	2312.60769773453	2187.39537444337
FBgn0021764	965.407369442566	0.766591717348766	0.228287401692871	3.3580114875551	0.000785053504876096	0.0145697155455847	795.420813167579	597.325706314212	838.264481349642	1185.2572775673	1328.41616180139	1280.67381088677
FBgn0028645	184.431140533001	1.24351374086991	0.370442923823533	3.3568295165014	0.000788417104576847	0.0145896760737418	340.045370053703	134.34995659818	229.616352034175	557.111511459286	578.151924433633	529.390229654163
FBgn0040571	70.3260181145927	1.06460864100756	0.317226191873623	3.35599224868443	0.000790807851727916	0.0145896760737418	117.708012710897	67.6582515242635	105.469711939142	207.014113547713	203.625835020651	195.987021191116
FBgn0036934	211.744956847628	0.710259908910789	0.211646825071364	3.35587320372654	0.000791148320333413	0.0145896760737418	410.194589750097	257.101355792201	375.735848783195	529.712584666206	620.573973396269	554.17019785074
FBgn0033579	51.6870315669569	0.808200645277956	0.240863219443137	3.35543403906363	0.000792405508414669	0.0145896760737418	85.6058274261072	59.9258799214905	84.5954981178538	133.950308766167	134.538498138644	132.910738508917
FBgn0085385	165.237354260532	1.2301542097494	0.366715731391442	3.35451714896926	0.000795036250583857	0.01460918390895	317.454943371814	133.383410147834	226.320423536076	491.151132142613	581.788100059002	513.621158983613
FBgn0053143	125.837749381209	0.860958790188649	0.256835883511897	3.35217485351407	0.000801793615296083	0.014665467839384	255.628512452959	149.814699803726	181.276067395401	381.555424970294	353.92109420256	327.771397509279
FBgn0051145	1331.41746456464	0.598952100818449	0.178688574017293	3.35193284804257	0.000802494814331519	0.014665467839384	2247.15296993531	1669.22571974861	2106.09831028475	2876.88731327336	3003.4810665546	3239.41766060717
FBgn0285991	2908.42230830012	-0.434151992772997	0.129527360665258	-3.35181687130174	0.000802831052941112	0.014665467839384	3706.01894565522	4738.97724604948	4303.38397568355	3005.76374670748	3239.83248220357	3192.11044859553
FBgn0051690	127.927686389315	0.70090678966313	0.209197558481071	3.35045396682558	0.000806792179567422	0.0146821105856763	262.762331405134	159.480164307192	206.544852547487	365.319023907729	323.61963065782	330.024121890786
FBgn0024196	346.242810605806	-0.717472934936718	0.21415080335466	-3.35031633642062	0.000807193193218626	0.0146821105856763	236.604995247157	378.886208535876	291.140350665341	196.866362883609	181.808781268438	173.459777376045
FBgn0040299	215.841877514249	0.6192476440129	0.184856920721706	3.34987536087518	0.00080847930951455	0.0146821105856763	103.440374806546	103.420470187088	132.935782756627	174.541311422581	157.567610432646	189.228848046594
FBgn0264270	1973.50662699713	0.647066052580379	0.193217371867272	3.34890204916394	0.000811324730680638	0.0147050630523754	2474.24620657957	1481.71570838137	2101.70373895395	3151.89135627057	3393.76391701084	2937.55259348523
FBgn0031896	415.42089399472	0.432219516302341	0.129099960485434	3.34794460569263	0.000814132825713185	0.0147165877834022	297.24245634065	256.134809341855	275.759351007549	396.77705096645	338.164333159295	380.710420474696
FBgn0035010	61.9707635817331	1.17189271895442	0.350110652542311	3.34720669149818	0.000816303211790496	0.0147165877834022	105.818314457271	67.6582515242635	91.1873551140502	182.659511953864	195.141425228124	217.387902815433
FBgn0004087	138.418076237713	-0.697676877808841	0.208444129823942	-3.34706896470589	0.000816708893981021	0.0147165877834022	85.6058274261072	127.584131445754	97.7792121102466	70.0194795823146	53.3305758387418	68.7080936359658
FBgn0027568	737.677363788837	0.29183803694536	0.0872496738081123	3.34486106603903	0.000823237975572427	0.01478759360001	583.784184253036	510.336525783016	627.325057471358	726.578947549816	654.511612566377	720.871802082264
FBgn0033029	1194.45982802085	0.431439360186187	0.128993426811989	3.34466159128418	0.00082383023067382	0.01478759360001	972.577317146606	817.698296993242	967.904335608172	1281.66090887628	1229.02736137464	1206.33390629704
FBgn0260400	73.833473468282	1.16766044532038	0.349301752133091	3.34284164963331	0.000829252054847863	0.0148562343082378	166.455775550764	42.5280438152513	108.765640437241	232.383490207972	231.503181481811	246.673319775025
FBgn0261793	1286.21806823757	0.841829672248216	0.252253574727796	3.33723584752614	0.000846161121308589	0.0151300117421678	1117.63163584084	722.976744859273	945.931478954184	1698.73346117094	1757.4848855949	1536.35802818783
FBgn0005427	586.175378822111	0.622722835429992	0.186733410715365	3.3348227992215	0.000853537710521901	0.0152326173367229	782.34214508859	511.303072233363	791.022839543568	1041.15921813703	1101.76121448674	1064.41227026209
FBgn0033438	611.348785439944	0.814712454520637	0.244408702425468	3.33340198788167	0.00085790892168768	0.0152812972296016	1041.53756701764	615.690088870798	852.546838174735	1423.72941817373	1535.67817244741	1453.00722607206
FBgn0034797	297.683500148922	0.567664600696933	0.170323377356382	3.33286369438977	0.000859570429376593	0.0152816173084963	466.076171542139	345.057082773744	450.443561406754	613.938915178266	585.424275684371	667.932779116848
FBgn0036428	3312.70975381054	0.661748413961338	0.198675279211863	3.33080399628211	0.000865955526801543	0.0153609913261465	4323.09428501841	3426.40716647877	4602.21482617779	6596.03793166732	6208.16385104627	6734.5195385154
FBgn0031651	236.290593920233	-0.417479667871787	0.125355736858959	-3.33035948998093	0.000867339260725632	0.0153609913261465	210.44765908918	213.606765526603	202.15028121669	159.319685426426	156.355551890857	153.185257942481
FBgn0037766	99.3247023497932	1.2729467834137	0.382412985215602	3.32872269673588	0.000872452239144787	0.0153912333680191	174.778564328302	80.2233553787696	149.415425247118	336.905322048239	333.316098992137	305.244153694209
FBgn0033778	98.6254300949176	-0.875313256544569	0.262992804339111	-3.32827834869547	0.000873845098877819	0.0153912333680191	179.534443629753	285.131202852253	184.571995893499	124.817333168474	127.266146887907	102.498959358572
FBgn0011589	239.092401409802	0.818387307467472	0.245893031703055	3.32822488624148	0.000874012821930961	0.0153912333680191	473.209990494315	285.131202852253	339.480635304115	666.707218631605	666.632197984273	600.351047671635
FBgn0032346	169.464852557571	-0.671670480953739	0.201863966723131	-3.32734212973718	0.000876786534885493	0.015410890739821	70.1492196963934	67.6582515242635	60.425355798467	40.5910026564143	31.5135220865293	51.8126607746627
FBgn0010078	7867.14124512171	-0.518756336446425	0.15611166123669	-3.32298261601296	0.000890604644283878	0.0156242301557575	8079.04996333886	9504.05124625833	7402.65540672856	5940.49323876623	5436.0825599263	6063.20767282629
FBgn0285892	320.976504000358	0.595093823041345	0.179185997684109	3.32109556959048	0.000896648283898294	0.0157006322856617	178.34547380439	148.84815335338	162.599139239511	243.546015938486	269.076996277288	226.398800341461
FBgn0039904	1488.88247416669	0.482012496732234	0.145398955543318	3.31510288317464	0.000916094012977426	0.0160109814523761	1353.04766126264	1074.79965278544	1379.89539787045	1766.72339062043	1734.4557733009	1814.56948930395
FBgn0265457	15.492944418123	1.33254953152227	0.402031112343485	3.31454330425992	0.00091792960538848	NA	19.0235172058016	17.3978361062392	14.2823568250922	38.5614525235936	30.3014635447397	58.5708339191839
FBgn0029067	352.619380221797	0.646965601116966	0.195458366154277	3.30999186090766	0.000932986841290998	0.0162756316141158	244.927784024695	187.510011367245	263.674279847856	381.555424970294	372.101972329403	334.529570653801
FBgn0034072	559.565460585953	0.530407737742516	0.160310250211165	3.30863271090806	0.000937527401023471	0.0163242130612664	594.4849126813	442.678274258753	488.896060551233	690.047045159043	791.474227788601	720.871802082264
FBgn0020251	1058.57184112774	0.679739595357	0.205692439051151	3.30464064937246	0.000950982460821418	0.0165275419078833	1487.40125152861	1116.36115015035	1598.52532157763	2158.42656625483	2158.67626292726	2412.66781259408
FBgn0052085	206.494841557718	0.886966349823966	0.268545153973679	3.30285740293381	0.000957050417797634	0.0166019678818702	392.360042369658	219.406044228683	299.929493326936	563.200161857748	604.817212353004	515.87388336512
FBgn0033624	781.043846497409	-0.438322261571089	0.132781594657249	-3.3010769504805	0.000963144627770193	0.0166765712272016	917.884705179927	1028.40542316881	786.628268212771	707.298221288019	633.906617355954	675.817314452122
FBgn0053531	143.411060600708	1.05427632729113	0.319594970347756	3.29878885810986	0.000971029184025086	0.0167818389462179	263.951301230497	132.416863697487	225.221780703377	424.175977759529	441.18930921141	423.51218372333
FBgn0003392	1499.82177246343	0.615332724307078	0.186616050129485	3.29731940998711	0.000976124242701227	0.0168385959343896	2102.09865124108	1465.28441872548	1923.72360005665	2821.07468462079	2940.45402238154	2648.07751046157
FBgn0266521	1752.39299642431	0.612783972435361	0.185990707575102	3.29470208713476	0.000985260723676863	0.016964730016199	914.317795703839	606.024624367332	930.550479296392	1253.24720701679	1298.11469825665	1193.94392219875
FBgn0259935	145.35945336555	0.79887799772064	0.242551186614836	3.29364703949783	0.000988965997920411	0.0169970533247024	269.89615035731	146.915060452686	249.391923022764	380.540649903884	414.524021292039	361.562263231886
FBgn0264443	131.383964760391	0.961356375473754	0.291966169350517	3.29269784102831	0.000992310555991067	0.0170230692797139	243.738814199333	117.918666942288	199.952995551291	352.126948044394	352.70903566077	386.342231428463
FBgn0259108	1997.75139658741	1.16037512373482	0.352526295806246	3.29159877586147	0.000996196259882554	0.017050997657142	3341.0052092689	1711.75376356387	3456.33035167231	5649.25279470646	6588.7502331682	6779.57402614554
FBgn0035914	168.804120510711	0.792442059363253	0.240775957342381	3.29120094925595	0.000997606229886564	0.017050997657142	288.919667563112	221.339137129376	298.830850494237	471.870405880816	446.037543378568	482.083017642514
FBgn0260657	1059.35606945209	0.919093483771618	0.27938932666803	3.28965137907248	0.00100311582054691	0.0170865962482265	2143.71259512877	1101.86295339515	1720.47467600726	2970.24661938312	3265.28571158115	3152.68777191915
FBgn0005533	6897.08709127597	-0.474577619788385	0.144266860407488	-3.28958167141032	0.00100336433120366	0.0170865962482265	6799.71843124871	7805.82913299931	5961.23601022695	5145.92436176692	4871.26327945235	4784.78658632103
FBgn0033602	53.6253307108148	0.606926937807463	0.184548932717366	3.2887046750737	0.00100649573177127	0.0170891484740179	91.5506765529202	87.9557269815425	101.075140608345	165.408335824888	130.902322513275	129.531651936657
FBgn0032723	428.550925249266	0.791318199731491	0.240631187471082	3.28851055446247	0.00100719007999159	0.0170891484740179	294.864516689925	203.941301023137	313.113207319329	439.397603755685	479.975182548677	484.335742024021
FBgn0020521	519.891599739301	0.365815018230401	0.11131403009329	3.28633342916269	0.00101500785136895	0.0171904244117095	898.861187974125	792.568089284229	922.859979467496	1126.4003237155	1021.76535072862	1217.59752820457
FBgn0262738	2551.79764739735	0.86706646770093	0.26407010359808	3.28347077494475	0.00102537275659275	0.0173019575465671	4217.27597056114	2608.70886948553	4108.92419429576	6087.63562339573	7139.02481114067	6716.49774346334
FBgn0263235	87.0881178256145	-3.54631501270678	1.08014499907076	-3.28318421670947	0.00102641568312891	0.0173019575465671	5.944849126813	3.86618580138648	16.479642490491	2.02955013282071	0	0
FBgn0035699	49.926813903352	0.965277627780354	0.294025227294021	3.28297553466421	0.00102717579755916	0.0173019575465671	83.2278877753819	50.2604154180243	78.0036411216574	140.038959164629	140.598790847592	130.65801412741
FBgn0038535	1475.78145202262	0.478711069835781	0.145955685554811	3.27983845244596	0.00103866543044927	0.017441789385927	1380.39396724598	1133.75898625659	1387.58589769934	1751.50176462428	1858.08574456344	1825.83311121148
FBgn0260997	31.2163880875423	0.943849514277453	0.287786600935553	3.27968540303521	0.00103922900836777	0.017441789385927	20.2124870311642	15.4647432055459	20.8742138212886	35.5171273243625	39.9979318790564	32.6645035318526
FBgn0030304	625.278438312052	-0.520091454981247	0.15864146370918	-3.27840807075932	0.00104394361074707	0.0174893471941013	1334.02414405684	1446.92003616889	1399.67096885904	1009.70119107831	969.64683343167	936.00698051619
FBgn0003371	1377.46686025062	0.528358560643091	0.161210090492196	3.2774534089643	0.00104748015901589	0.0175170333067082	1915.43038865915	1356.06466983631	1672.13439136849	2191.91414344637	2505.32500587908	2430.68960764613
FBgn0034354	83.522848866929	-0.725848661181804	0.221589203510559	-3.27564993999005	0.00105419138622025	0.0175670429661836	61.8264309188552	68.6247979746101	58.2280701330682	38.5614525235936	31.5135220865293	43.928125439388
FBgn0053513	105.954591341511	0.943547753449109	0.288050383938604	3.27563442390765	0.00105424929825021	0.0175670429661836	233.038085771069	106.320109538128	161.500496406812	303.417744856697	345.436684410032	312.00232683873
FBgn0036844	689.958904333241	0.64254949062419	0.196211120191412	3.2747863117919	0.0010574192624712	0.0175883440115514	766.885537358876	477.473946471231	716.315126920009	1048.2626436019	1054.49093135694	955.155137759
FBgn0031505	627.522226397114	-0.555843079145725	0.169790340340494	-3.27370260305179	0.00106148264269846	0.0176244028782326	694.358378011758	977.178461300434	711.920555589211	555.081961326465	519.973114427733	547.412024706219
FBgn0024320	1068.62039217829	0.453306262601161	0.138493361834604	3.27312628270606	0.00106364944261497	0.0176288993180641	1310.24474754958	1149.22372946213	1442.51803933431	1809.34394340967	1772.02958809638	1759.37774195703
FBgn0016061	260.198491453566	1.04445197938158	0.319422731630983	3.26981105586499	0.00107619342165238	0.0178050648301135	472.021020668952	244.536251937695	430.667990418165	726.578947549816	798.746579039338	839.139832111385
FBgn0259236	172.041293671187	0.537721242155178	0.164647236293209	3.26589898659209	0.00109117165951147	0.0180208065544186	231.849115945707	191.376197168631	234.010923364972	295.299544325414	335.740216075716	322.139586555512
FBgn0005558	155.876661388813	0.648045477836443	0.198569989110735	3.26356203542445	0.00110021094949288	0.0181239307695157	290.108637388474	210.707126175563	274.66070817485	391.703175634398	389.070791914458	432.523081249358
FBgn0038042	98.0239021811588	-0.478228707504462	0.146569454223832	-3.26281291034993	0.00110312317797528	0.0181239307695157	197.368991010191	217.47295132799	187.867924391597	158.304910360016	128.478205429696	145.300722607206
FBgn0031170	804.6914032513	0.487358770491655	0.149382628468284	3.2624862441427	0.00110439532549755	0.0181239307695157	1026.08095928792	792.568089284229	1010.75140608345	1320.22236139987	1324.77998617602	1318.97012537239
FBgn0002643	544.031138710033	0.742512539005874	0.227627259991121	3.26196668639264	0.00110642145225555	0.0181239307695157	772.83038648569	576.061684406586	837.165838516943	1151.76970037576	1266.60117617012	1237.87204763814
FBgn0003963	153.223472303072	0.743746950637114	0.228049942652656	3.26133364466536	0.00110889477935234	0.0181239307695157	145.054318694237	109.219748889168	152.711353745217	207.014113547713	246.047883983286	227.525162532215
FBgn0035722	242.063519589377	-0.533168856627181	0.163484624194904	-3.26127829606498	0.00110911127208587	0.0181239307695157	204.502809962367	248.402437739082	188.966567224297	139.024184098219	180.596722726649	126.152565364396
FBgn0024250	61.4735698697159	0.628177451795243	0.192723413063323	3.25947658258234	0.00111617994568346	0.0182074405876576	73.7161291724812	60.8924263718371	64.8199271292646	95.3888562425736	98.1767418849566	113.762581266107
FBgn0036821	959.494977464611	0.4610452387351	0.14160467894843	3.25586161530018	0.00113048836297914	0.0183955588039376	1643.15629865111	1379.26178464463	1683.12081969548	2162.48566652047	2267.76153168832	2045.47373840842
FBgn0260658	389.326263559554	1.26220153194551	0.3877058078738	3.2555651896666	0.00113166913700283	0.0183955588039376	731.216442597999	271.599552547401	573.491558669087	1201.49367862986	1341.74880576107	1235.61932325663
FBgn0037270	1543.144376761	-0.451610818823807	0.138824712776891	-3.2531010494479	0.00114152895073562	0.0185234488375913	1684.7702425388	2024.91481347617	1653.4574632126	1329.35533699757	1313.87145929991	1279.54744869602
FBgn0037134	161.563929183916	-0.517607267973147	0.159184842316626	-3.25161152557229	0.00114752745784779	0.0185302550148928	128.408741139161	160.446710757539	132.935782756627	113.65480743796	87.2682150088503	93.4880618325436
FBgn0040582	269.746339402447	-0.78041474226063	0.240010840469885	-3.25158122330125	0.0011476497908799	0.0185302550148928	414.950469051547	516.135804485096	524.052631197614	317.624595786442	236.35141564897	292.85416959592
FBgn0030349	718.554549606967	0.323733349203318	0.099569562071438	3.25132844283326	0.00114867075847847	0.0185302550148928	1116.44266601548	979.111554201127	1168.95597399216	1361.8281391227	1351.44527409539	1369.6564239563
FBgn0002579	8996.65590932831	-0.500003885930535	0.153817234716305	-3.25063629477364	0.0011514706076515	0.0185302550148928	8611.70844510131	10759.5950852586	8294.75338688047	6725.92914016785	6428.75850565197	6409.00086538763
FBgn0001218	4064.05129731886	0.398313743611529	0.122538202462037	3.2505270650998	0.0011519130349116	0.0185302550148928	3879.60854015816	3407.07623747184	3791.41641564563	4930.79204768793	5009.43795321636	4658.63402095663
FBgn0036364	161.757245914349	-0.72371087402964	0.222781944789961	-3.24851672657744	0.00116008388037401	0.0186294644554707	273.463059833398	375.986569184836	264.772922680555	189.762937418737	184.232898352017	180.217950520566
FBgn0030551	645.411217422316	-4.13175106891132	1.27218556767522	-3.24775816822199	0.0011631808688157	0.0186469926176696	0	0	10.986428326994	0	0	0
FBgn0050361	190.746106632421	1.3049045590798	0.402275373127297	3.24380920695056	0.00117942719534774	0.0188606054031411	347.179189005879	150.781246254073	262.575637015157	596.68773904929	652.087495482798	628.510102440474
FBgn0005666	6623.02882920212	0.889310796157798	0.274179491020746	3.24353507567971	0.00118056273872103	0.0188606054031411	7834.12217931417	5623.36724811664	7186.22276868678	11544.0811554842	12129.0698276884	14563.8631264432
FBgn0040071	416.197300285018	0.605878152950508	0.186968768442858	3.2405313357759	0.00119307158373408	0.0190194896664485	670.578981504506	490.039050325737	718.512412585408	921.415760300604	959.950365097353	976.556019383317
FBgn0039955	1825.57937967613	0.464543467725535	0.143370243998437	3.24016654202387	0.0011945990498178	0.0190194896664485	1247.22934680537	923.051860081023	1161.26547416327	1473.45339642784	1575.67610432646	1545.36892571385
FBgn0262127	251.727423882988	1.02441828560111	0.316557963151116	3.23611598774435	0.00121168138187093	0.0192584845959588	246.116753850058	170.112175261005	236.208209030371	411.998676962605	455.734011712885	458.42941163669
FBgn0033802	37.5726931804541	1.0921683375198	0.337755465571195	3.23360670321879	0.00122237663606734	0.0193756666246421	23.779396507252	20.297475457279	39.5511419771784	56.82740371898	73.9355710491648	47.3072120116486
FBgn0052645	69.628526880092	0.921837588820713	0.28509771244535	3.23340927892368	0.00122322180131909	0.0193756666246421	68.9602498710308	36.7287651131716	46.1429989733748	100.462731574625	79.9958637581128	104.751683740079
FBgn0266756	1114.77368424898	0.428076870531675	0.132465257772557	3.23161618170617	0.00123092272538428	0.0194015291802991	1861.92674651783	1424.68946781092	1818.25388811751	2208.15054450894	2290.79064398232	2366.48696277318
FBgn0031378	87.2885184342457	-0.805638295673692	0.249312691469341	-3.23143716000019	0.00123169403408823	0.0194015291802991	38.0470344116032	46.3942296166378	47.2416418060742	23.3398265274382	25.4532293775813	27.0326925780849
FBgn0022382	990.01728315372	0.849511235147425	0.262912095464324	3.23116071798492	0.00123288595158262	0.0194015291802991	1206.80437274304	607.957717268025	1034.92154840284	1763.6790654212	1713.85077809048	1654.62605821695
FBgn0015268	4902.93658551367	-0.331266517139001	0.102524769086731	-3.23108766876387	0.00123320109115474	0.0194015291802991	2660.9144691615	2847.44584272115	2484.03144473334	2052.88995934815	2164.7365556362	2136.70907585946
FBgn0037705	423.856076388301	0.63868375459051	0.1977874710055	3.22914162026345	0.00124162392230758	0.0195010459959727	757.373778755976	489.07250387539	524.052631197614	889.957733241883	956.314189471984	907.847925747351
FBgn0036254	185.876177908286	0.690503017691142	0.214080178222893	3.22544115678105	0.00125778688744491	0.0197215893414212	46.3698231891414	56.059694120104	68.1158556273628	85.24110557847	111.509385844642	79.9717155435012
FBgn0027499	560.937383930822	0.691236724253508	0.214376704098949	3.22440223698214	0.0012623595053748	0.019753596778057	353.124038132692	311.227957011612	371.341277452397	546.963760795182	549.062519430683	575.571079475058
FBgn0031558	366.284563449814	-0.529103486939374	0.1641133301796	-3.22401285965217	0.00126407722982834	0.019753596778057	744.295110676987	756.805870621404	796.516053707065	540.87511039672	423.008431084566	627.38374024972
FBgn0026666	229.415856943712	-0.530637502933158	0.164621504851028	-3.22337900758076	0.00126687806225922	0.0197574303788785	266.329240881222	294.796667355719	262.575637015157	225.280064743099	185.444956893807	158.817068896249
FBgn0263346	1597.01124061039	0.514869510281545	0.159748717846292	3.22299619817258	0.00126857237429452	0.0197574303788785	2267.36545696648	1617.99875788024	2265.40152102616	2819.04513448797	2971.96754446807	2994.99706521366
FBgn0262169	564.309376578898	0.305366879838578	0.0947850498350322	3.22167768408679	0.0012744241334999	0.0198011656970519	577.839335126223	537.399826392721	570.195630170989	692.076595291864	666.632197984273	721.998164273018
FBgn0019940	1026.58593565586	-0.406009763227091	0.126039681962378	-3.22128520879861	0.00127617080316767	0.0198011656970519	2048.59500909976	2216.2910106448	1733.65838999965	1593.19685426426	1445.98584035498	1487.92445398542
FBgn0014343	32.7098334745403	0.794107794346209	0.246546391683664	3.22092645089328	0.0012777693502077	0.0198011656970519	41.613943887691	28.9963935103986	39.5511419771784	71.034254648725	61.814985631269	56.3181095376769
FBgn0037956	309.643741825316	0.453647460608664	0.140890042702009	3.2198688559429	0.00128249252526698	0.0198412903493051	576.650365300861	452.343738762219	428.470704752766	628.145766108011	662.996022358904	702.850007030207
FBgn0058160	835.317380039422	0.355044970769307	0.110311512040376	3.21856680415509	0.00128832956741882	0.0198984855778409	693.169408186395	745.207313217245	736.090697908598	932.578286031118	926.012725927245	923.616996417901
FBgn0004370	728.344861991027	0.708166834366226	0.220108351051851	3.21735559319784	0.00129378137930914	0.019949551019596	800.176692469029	546.098744445841	700.934127262217	1091.89797145754	1119.94209261358	1130.86763951655
FBgn0085409	233.014408245152	0.83597975483684	0.259901950361434	3.21651974398145	0.00129755605010064	0.0199746293937678	428.029137130536	275.465738348787	406.497848098778	630.175316240832	672.692490693221	676.943676642876
FBgn0031048	604.073572804625	-0.455806221903841	0.141813223860476	-3.21413059724451	0.00130840148732567	0.020108292610172	540.981270539983	660.151225586742	546.025487851602	425.19075282594	442.401367753199	407.743113052781
FBgn0266429	151.480893169069	1.179590518188	0.367162364305824	3.21272176253193	0.00131483598456259	0.0201738366080247	296.053486515287	132.416863697487	214.235352376383	479.988606412099	471.49077275615	502.357537076078
FBgn0263049	245.190675976035	0.555729431943836	0.173014635068136	3.21203713041374	0.00131797340082731	0.0201764731808257	401.871800972559	300.595946057799	386.722277110189	514.490958670051	522.397231511312	562.054733186015
FBgn0259171	871.731573221199	0.849288166968242	0.264432605723413	3.21173769265265	0.00131934778381824	0.0201764731808257	1513.55858768659	822.531029244975	1404.06554018983	2126.96853919611	2118.6783310482	2490.38680375607
FBgn0033519	154.874848782361	-0.695836665438225	0.216721979914597	-3.21073416601506	0.00132396349820996	0.0202138138035405	77.2830386485689	77.3237160277297	69.2144984600622	38.5614525235936	47.2702831297939	52.9390229654163
FBgn0011592	319.702431452289	0.717728673848701	0.223706177140674	3.20835429321815	0.00133496933863889	0.0203484342797776	330.533611450803	240.670066136309	320.803707148225	485.062481744151	483.611358174045	496.72572612231
FBgn0030847	360.024112361716	0.356220506949686	0.111074695625644	3.20703563438301	0.00134110382465117	0.0204084834068847	598.051822157387	479.407039371924	583.379344163382	688.017495026222	695.721602987223	738.893597134321
FBgn0041721	1719.25366459571	-0.736765772916549	0.229768794860399	-3.20655280175965	0.00134335649023093	0.0204093605329528	1568.25119965327	2075.1752288942	1390.88182619744	1079.72067066062	951.465955304826	990.072365672359
FBgn0002036	201.886524664018	-0.440978971802195	0.137570084726812	-3.20548593597145	0.00134834635819725	0.0204401821267135	274.65202965876	310.261410561265	282.351208003746	235.427815407203	207.262010646019	195.987021191116
FBgn0029512	505.239262805109	-0.501951985787499	0.15663923765012	-3.20450988729078	0.00135292643456206	0.0204401821267135	139.109469567424	169.145628810659	154.908639410615	94.3740811761632	119.993795637169	114.888943456861
FBgn0033246	9799.86257429983	0.663141903457184	0.206967313686759	3.2040900161696	0.00135490107719169	0.0204401821267135	15342.466626479	11054.3917526143	14869.0320977537	20110.8122661205	21341.9268038311	23891.2684280733
FBgn0013811	77.415701067405	-0.661811776367254	0.206575913467911	-3.20372189214625	0.00135663454153977	0.0204401821267135	143.865348868875	174.944907512738	164.79642490491	108.580932105908	96.964683343167	100.246234977065
FBgn0003345	519.290931189776	0.568875930325323	0.177583360941654	3.20343036255648	0.00135800878062798	0.0204401821267135	615.886369537826	472.641214219498	604.25355798467	801.672302464182	896.923320924295	810.980777342547
FBgn0262743	1859.89434548744	0.793912591735864	0.247841302825363	3.20331027429791	0.00135857523707345	0.0204401821267135	986.844955050957	601.191892115598	994.271763592957	1394.30094124783	1567.19169453394	1513.83078437275
FBgn0264507	37.5665220366937	0.874764305431937	0.273191679690299	3.20201664422432	0.00136469112664457	0.0204990276179987	52.3146723159544	49.2938689676777	45.0443561406754	73.0638047815457	100.600858968536	95.7407862140507
FBgn0267826	11.1674690820782	-4.1203700868487	1.28750251397545	-3.20028119721968	0.00137293568096685	NA	2.3779396507252	6.76582515242635	1.0986428326994	0	0	0
FBgn0264000	147.527371031174	1.01321252899818	0.316604434274489	3.20024743595267	0.00137309652453687	0.0205920185244254	269.89615035731	150.781246254073	231.813637699573	422.146427626709	446.037543378568	447.165789729154
FBgn0000489	297.956172472525	0.427111173813021	0.133483880763408	3.19972098031859	0.00137560688499127	0.0205964457594989	411.383559575459	345.057082773744	393.314134106385	502.313657873127	526.033407136681	515.87388336512
FBgn0010313	483.131460712131	0.640043331540883	0.200286048117297	3.1956461149308	0.00139518119486799	0.0208559401123514	669.390011679143	433.979356205633	539.433630855406	819.938253659569	924.800667385455	813.233501724054
FBgn0052221	192.55321709771	-0.539684050914019	0.16904890701895	-3.19247287918592	0.00141060190714368	0.0210501918973691	180.723413455115	231.971148083189	163.697782072211	142.06850929745	113.933502928221	140.795273844192
FBgn0024912	126.403421323621	-0.600217022661834	0.188043179373559	-3.19191062744938	0.00141335056943229	0.0210501918973691	114.14110323481	141.115781750607	128.54121142583	95.3888562425736	81.2079222999024	76.5926289712405
FBgn0051637	692.859129304011	0.290080770014746	0.0909092578682806	3.19088260994328	0.00141838897833355	0.0210501918973691	978.522166273419	879.557269815425	989.87719226216	1151.76970037576	1102.97327302852	1224.3557013491
FBgn0250910	200.775085529895	0.931877285240891	0.292108758452525	3.19017235285105	0.00142187968096057	0.0210501918973691	397.115921671108	198.142022321057	342.776563802213	593.643413850059	618.14985631269	575.571079475058
FBgn0032945	1492.24119287944	0.628220901554891	0.196939701161646	3.18991497320926	0.00142314657920638	0.0210501918973691	2352.97128439258	1930.1932613422	2203.877522395	3271.63481410699	3156.20044282009	3597.6008372668
FBgn0033791	43.0479352261797	0.836923477494885	0.262388812181497	3.18963095467644	0.00142454580963253	0.0210501918973691	80.8499481246567	46.3942296166378	83.4968552851544	109.595707172319	135.750556680434	129.531651936657
FBgn0283450	619.525209193447	-0.457249253556671	0.143355252109336	-3.18962330872909	0.00142458349527013	0.0210501918973691	538.603330889257	577.994777307279	408.695133764177	370.39289923978	367.253738162245	373.952247330174
FBgn0263131	239.64642998508	0.870132159805839	0.272830470598752	3.18927778813067	0.00142628746992283	0.0210501918973691	435.162956082711	250.335530639775	411.991062262275	653.51514276827	702.993954237961	647.658259683284
FBgn0039510	46.7848791014303	0.967115192811518	0.303483686740509	3.18671228492898	0.00143899843359356	0.0211815733293958	99.8734653304583	50.2604154180243	72.5104269581604	128.876433434115	130.902322513275	173.459777376045
FBgn0085421	515.043999974701	0.775443492981999	0.24339136018005	3.18599432785273	0.00144257425506596	0.0211815733293958	966.632468019793	565.429673452773	847.053624011238	1258.32108234884	1378.11056201476	1433.85906882925
FBgn0034158	370.555818277278	0.444852517165342	0.13963807741899	3.18575366682071	0.00144377471113637	0.0211815733293958	385.226223417482	345.057082773744	369.143991786999	450.560129486199	517.548997344154	528.263867463409
FBgn0039938	799.939165391707	0.682146331080708	0.21413110170078	3.18564807103042	0.00144430173056968	0.0211815733293958	1329.26826475539	860.226340808493	1304.08904241419	1793.1075423471	2007.16894520356	1803.30586739641
FBgn0027780	181.096473882436	0.469469391437081	0.14741774790766	3.18461920698414	0.00144944599044879	0.0212069962533126	130.786680789886	115.019027591248	125.245282927732	173.526536356171	145.44702501475	192.607934618855
FBgn0052369	508.215036748594	0.443250133905879	0.139207270625205	3.18410189291955	0.0014520389057933	0.0212069962533126	802.554632119755	632.12137852669	781.135054049274	954.903337492146	1109.03356573747	947.270602423725
FBgn0037546	113.419981030057	1.29170124103147	0.405693379340328	3.18393473201811	0.00145287767405465	0.0212069962533126	218.770447866718	76.3571695773831	156.007282243315	382.570200036705	349.072860035401	370.573160757914
FBgn0042135	1596.18240256674	0.354360971524227	0.11135215811739	3.182344891337	0.00146087741507287	0.0212903420146514	2037.8942806715	1572.57107471395	1896.25752923917	2359.35202940408	2421.6929664956	2254.97710588858
FBgn0016697	1210.17986814101	-0.486987497207347	0.153060247387104	-3.18167195938021	0.00146427567743228	0.0213064714378174	653.93340394943	758.738963522098	622.93048614056	509.417083337999	470.27871421436	473.072120116486
FBgn0000964	119.439205198461	1.0531842555685	0.33121327836401	3.17977667070169	0.00147388595274013	0.0214127993571528	101.062435155821	59.9258799214905	90.0887122813508	142.06850929745	199.989659395282	177.965226139059
FBgn0266137	95.8922929271322	0.958526021187576	0.301662356816004	3.17747972038891	0.00148561079213975	0.0215494682454219	196.180021184829	111.152841789861	131.837139923928	265.871067399514	306.650811072766	279.337823306877
FBgn0069969	563.156031539283	0.874957930816871	0.275417475930048	3.17684245657345	0.00148887891650915	0.0215632339029627	1172.32424780752	521.935083187175	952.52333595038	1595.22640439708	1621.73432891447	1634.35153878338
FBgn0003513	58.8792982001763	0.680665920290836	0.214301469065775	3.17620743925895	0.00149214210797312	0.0215768854120282	84.4168576007445	94.7215521339689	125.245282927732	142.06850929745	172.112312934121	174.586139566798
FBgn0030913	110.847339777094	1.38997477447464	0.437684404804592	3.17574663208574	0.00149451420251622	0.0215776289673848	199.746930660917	76.3571695773831	161.500496406812	361.259923642087	380.58638212193	403.237664289766
FBgn0284255	332.165726369789	-0.658245837915426	0.207368261291186	-3.17428440503303	0.00150206432371429	0.0216530140804581	265.14027105586	316.060689263345	253.786494353561	187.733387285916	180.596722726649	161.069793277756
FBgn0263219	447.459415206755	0.741015770737021	0.233497238089974	3.17355261586214	0.00150585605208224	0.0216740705452951	890.538399196587	512.269618683709	676.763984942831	1113.20824785216	1151.45561470011	1208.58663067855
FBgn0261794	909.601100300653	0.630548815001145	0.198918245424955	3.16988928619436	0.00152497031060027	0.0219152611251334	1437.46451886338	1002.30866900945	1356.82389838376	1950.39767764071	1940.50572540513	1984.65018010773
FBgn0003447	723.48378139407	0.538865867127746	0.170026448314181	3.16930614307729	0.00152803353038275	0.0219253946998438	693.169408186395	541.266012194108	506.474345874424	787.465451534437	862.985681754186	877.436146597006
FBgn0038609	237.774165020352	-0.689518247599053	0.217636633671607	-3.16820856841349	0.00153381440902177	0.0219744320109159	65.393340394943	87.9557269815425	60.425355798467	42.620552789235	39.9979318790564	50.6862985839092
FBgn0259231	32.7256484710744	0.655565006860597	0.206995606927611	3.16704792237381	0.00153994938930131	0.0219972856200151	66.5823102203056	54.1266012194108	51.6362131368718	86.2558806448803	92.1164491760086	92.3616996417901
FBgn0260446	186.050786027387	1.13147984612875	0.357270497411589	3.16701170213123	0.00154014120656376	0.0219972856200151	337.667430402978	176.878000413432	304.324064657734	595.67296398288	613.301622145531	583.455614810332
FBgn0250823	1598.4837751513	0.674101538548491	0.213162490623642	3.16238347833287	0.0015648334637308	0.0223156772174371	1441.03142833947	985.877379353554	1262.34061477161	1886.46684845685	2148.97979459294	1849.48671721731
FBgn0000448	14.4565487015575	1.33262885976759	0.421918501426728	3.15849827694513	0.00158584246817278	NA	32.1021852847902	10.6320109538128	18.6769281558898	56.82740371898	46.0582245880043	49.5599363931557
FBgn0033244	749.251191257926	0.399641569713059	0.126564569953442	3.1576101420806	0.00159068132912748	0.0226495482361827	853.680334610346	739.408034515165	919.564050969398	1067.5433698637	1090.85268761063	1154.52124552238
FBgn0037244	316.596063143507	-0.356441450328967	0.112972304923569	-3.15512240429294	0.00160430782319371	0.0228086454740904	234.227055596432	259.034448692895	227.419066368776	181.644736887454	192.717308144544	190.355210237348
FBgn0003159	423.709285386071	0.557448031273975	0.177091402475639	3.14779838818351	0.00164505112286112	0.0233521913593323	393.54901219502	280.29847060052	343.875206634912	508.402308271589	495.731943591941	491.093915168542
FBgn0033555	242.975474521163	-0.563466938843469	0.179083332491188	-3.14639520610437	0.00165296484397431	0.0234022782148246	225.904266818894	283.19810995156	221.925852205279	182.659511953864	141.810849389382	170.080690803784
FBgn0266418	496.840839396259	0.494762301673394	0.157264503800316	3.14605196797371	0.00165490597678551	0.0234022782148246	845.357545832808	641.786843030157	742.682554904795	1058.410394266	978.131243224197	1102.70858474771
FBgn0267978	620.522544988939	0.734116456956864	0.233361348812517	3.14583567798391	0.00165613025009191	0.0234022782148246	979.711136098782	767.437881575217	1050.30254806063	1486.64547229117	1551.43493349067	1614.07701934982
FBgn0260971	149.219585511817	1.32305282942638	0.420662577985879	3.14516407844291	0.00165993704009197	0.0234204773881261	260.384391754409	144.015421101647	205.446209714788	484.04770667774	539.366051096366	501.231174885324
FBgn0033032	260.716449687591	-0.396016942747815	0.125965817833123	-3.14384449337241	0.00166744023048475	0.0234906958531019	262.762331405134	277.39883124948	257.08242285166	196.866362883609	204.83789356244	204.997918717144
FBgn0028523	175.677563768759	0.40851533322849	0.130015175854236	3.14205884462664	0.00167764315402921	0.0235986778308073	258.006452103684	262.900634494281	290.041707832642	354.156498177215	376.950206496562	345.793192561336
FBgn0039431	276.427670799772	1.07109616833789	0.341056635443416	3.14052288396421	0.00168646531347322	0.0236869403091752	362.635796735593	167.212535909965	277.956636672948	515.505733736461	597.544861102267	582.329252619579
FBgn0262617	427.430936814675	0.683175402772895	0.217627890791917	3.1391904791565	0.00169415284725035	0.0237471156658331	656.311343600155	384.685487237955	546.025487851602	832.115554456493	848.440979252711	865.046162498717
FBgn0003517	14235.5943078139	-0.451876233684804	0.143960255393145	-3.13889574904381	0.00169585769005304	0.0237471156658331	13196.3760916995	14592.9183073333	11207.2555363666	9941.75132562227	9471.02544554384	9097.62741471632
FBgn0038166	264.769047813227	-0.483397685138834	0.154031679116256	-3.13830043217271	0.00169930606679632	0.0237596207655221	263.951301230497	293.830120905373	252.687851520862	194.836812750789	170.900254392332	214.008816243172
FBgn0286071	345.514401301808	0.497400182488398	0.158543973340828	3.13730110332935	0.00170510918899833	0.0238049628217814	425.651197479811	405.949509145581	509.770274372522	560.155836658517	636.330734439533	697.21819607644
FBgn0035756	169.214576624926	1.12655709062627	0.359383319360523	3.13469498982544	0.00172032879682236	0.0239814350117756	319.832883022539	136.283049498874	275.759351007549	505.357983072358	579.363982975423	511.368434602106
FBgn0065099	58853.4363549064	-0.644515637604626	0.205696362916423	-3.13333511816395	0.0017283199074754	0.0240567642211172	77976.2080567553	100482.168978035	67558.8437111842	55303.2115692316	53381.482297497	48694.8902306569
FBgn0038397	97.5080126407565	0.985587472507909	0.31484613491963	3.13037818539362	0.0017458138835361	0.0242639424351549	179.534443629753	94.7215521339689	196.657067053193	305.447294989518	287.257874404132	337.908657226061
FBgn0032699	776.340512927795	-0.690363821282136	0.220628501212092	-3.12907814488792	0.00175355666336455	0.0243351788894978	897.672218148762	912.41984912721	1287.6093999237	570.303587322621	707.842188405119	642.026448729516
FBgn0038975	791.661502369487	0.950292770481754	0.303903897847797	3.12695156992586	0.00176629020765332	0.0244753596881677	1537.33798419384	819.631389893935	1356.82389838376	2317.74625168126	2447.14619587318	2409.28872602182
FBgn0083167	968.158373594233	-0.464031532034539	0.148431199618443	-3.12623985541703	0.00177057077396895	0.0244981652624454	1053.42726527126	1271.00858220581	938.240979125288	823.99735392521	764.80893986923	777.189911619941
FBgn0031969	978.956011265218	0.288748997594814	0.0923926825680446	3.12523664828282	0.00177662070266924	0.0245453481328656	468.454111192864	532.567094140988	525.151274030313	598.717289182111	633.906617355954	635.268275584995
FBgn0263395	715.579706604675	0.693175309802026	0.221866981587905	3.12428331985662	0.00178238743712444	0.0245884842587286	964.254528369068	699.779630050954	962.411121444675	1299.92686007167	1464.16671848182	1481.1662808409
FBgn0003479	183.732906611556	-0.660523338733762	0.211598363875848	-3.12159000965298	0.00179877251216309	0.0247777582490258	79.6609782992942	112.119388240208	93.384640779449	57.8421787853904	56.9667514641106	66.4553692544587
FBgn0015600	1249.83766298768	0.818420321171499	0.262273690519529	3.12048196504315	0.0018055535380782	0.0248343739601348	1718.06139764896	1060.30145603024	1618.30089256622	2364.42590473613	2676.22526027141	2711.15379314376
FBgn0024941	121.941057657607	1.07432845740064	0.344452315180884	3.11894683255786	0.00181498708828396	0.0249272525064464	249.683663326146	119.851759842981	192.262495722395	413.013452029015	396.343143165195	371.699522948667
FBgn0027791	199.998378044578	-0.599974646724425	0.192439723819183	-3.1177276438422	0.00182251137901709	0.0249909627484961	194.991051359466	213.606765526603	203.248924049389	135.979858898988	144.234966472961	123.899840982889
FBgn0033544	670.583352164341	0.265681890442135	0.085237970221828	3.11694295101948	0.00182736930466455	0.0249909627484961	725.271593471186	723.943291309619	710.821912756512	898.075933773166	846.016862169132	851.529816209674
FBgn0024189	249.827988553262	0.898051860801887	0.288126316334396	3.11686857426663	0.00182783037776189	0.0249909627484961	501.745266303017	239.703519685962	440.55577591246	694.106145424684	755.112471534913	751.28358123261
FBgn0287182	5712.71703837954	0.714137085741394	0.229193100155607	3.11587515181104	0.00183399901668972	0.0249909627484961	5067.3893956954	3328.78597499376	4586.83382652	7026.30255982531	7272.35125073752	6998.08829115173
FBgn0010622	150.016206232736	-0.489130663697133	0.156990422604648	-3.11567199821431	0.00183526284885214	0.0249909627484961	142.676379043512	153.680885605113	131.837139923928	102.492281707446	95.7526248013774	107.004408121586
FBgn0021800	374.270909804047	0.792406571198348	0.254335689002977	3.11559331018257	0.00183575258735458	0.0249909627484961	445.863684510975	344.090536323397	433.963918916263	722.519847284174	758.748647160282	637.520999966502
FBgn0085422	102.501068773489	0.811431251900537	0.260526570427107	3.11458155907199	0.00184206023013148	0.0250401696195358	192.613111708741	115.985574041595	175.782853231904	310.521170321569	271.501113360868	265.821477017835
FBgn0025640	244.922347622142	-0.465418582687752	0.149474824546522	-3.11369211571074	0.00184762180124835	0.0250484887197729	296.053486515287	330.558886018544	286.745779334543	222.235739543868	213.322303354967	226.398800341461
FBgn0003250	3637.79094925634	-0.484082751900144	0.155472544105601	-3.11362211691437	0.00184806014860875	0.0250484887197729	7042.26827562268	8810.07089490945	6832.45977655757	5403.67722863515	5329.42140824882	5486.51023116048
FBgn0013334	1673.14637613081	0.694792146932238	0.223189431717598	3.11301543977834	0.00185186329461771	0.0250635006016818	3061.59730030869	1981.42022321057	2664.20886929605	4308.73493197838	4308.86811606198	3855.53777894936
FBgn0036317	218.334330296606	0.678820649523103	0.218164240932972	3.11151198115763	0.00186131920746317	0.0251548633590008	228.282206469619	144.981967551993	236.208209030371	318.639370852852	306.650811072766	348.045916942843
FBgn0002023	54.1063148604147	0.775161686648911	0.249335374231033	3.10891179817369	0.00187777766023212	0.0253404596296636	99.8734653304583	43.494590265598	83.4968552851544	138.009409031809	111.509385844642	135.163462890425
FBgn0264494	1533.83843806451	0.427326481123742	0.137549391237999	3.10671299434795	0.00189179969805695	0.0254926863659906	2193.649327794	1955.32346905121	2142.35352376383	2831.2224352849	2808.33964132647	2819.2845634561
FBgn0004404	1926.73677091787	-0.576040238289102	0.185761318913293	-3.10096979101433	0.0019288796788776	0.0259547369814818	1902.35172058016	2559.41500051785	2003.92452684371	1538.3990006781	1407.19996701771	1392.18366777137
FBgn0020545	674.922715869247	-0.58159937602258	0.187633072195701	-3.09966345067342	0.00193740646535599	0.0260317995879769	606.374610934926	893.088920120278	734.992055075899	501.298882806716	503.004294842679	489.967552977789
FBgn0026373	188.970359506126	-0.477873242623102	0.154204188442991	-3.09896409071774	0.00194198556074758	0.0260556735120216	154.566077297138	174.944907512738	128.54121142583	94.3740811761632	105.449093135694	130.65801412741
FBgn0052082	341.963857294208	0.513696965056006	0.165804456753495	3.09820963268635	0.00194693655410077	0.0260844612104164	637.287826394353	562.530034101734	586.67527266148	800.657527397772	861.773623212397	887.573406313788
FBgn0030311	432.980639408557	-0.394603136973855	0.127386242659611	-3.09769036856103	0.00195035086028915	0.0260926076244152	487.477628398666	513.236165134056	462.528632566448	366.333798974139	375.738147954772	371.699522948667
FBgn0003255	38.9317799957737	0.712669740278766	0.230327177197374	3.09416261229154	0.00197369275989548	0.0263497880153604	59.44849126813	41.5614973649047	58.2280701330682	82.1967803792389	87.2682150088503	90.108975260283
FBgn0264491	644.39078233659	0.52992014116677	0.171277364616372	3.09392979249586	0.00197524222915747	0.0263497880153604	832.27887775382	618.589728221838	895.393908650011	1096.9718467896	1094.488863236	1193.94392219875
FBgn0036560	308.266506165909	-0.469530061853647	0.151779653231392	-3.09349805364119	0.0019781185060075	0.0263503522476472	588.540063554487	732.642209362739	646.001985627247	497.239782541075	432.704899418883	491.093915168542
FBgn0033159	334.285959174982	0.809682796661043	0.261799207243554	3.09276259919224	0.0019830270130867	0.0263779473071247	596.862852332025	398.217137542808	487.797417718534	809.790502995465	916.316257592928	871.804335643238
FBgn0036848	267.983382323819	-0.377400732346866	0.122072687443998	-3.09160665050487	0.00199076454611898	0.0264095109504202	258.006452103684	318.960328614385	257.08242285166	214.117539012585	223.018771689284	207.250643098651
FBgn0023096	50.5111916317534	1.06172008629777	0.343459608390263	3.09125166500327	0.00199314625565347	0.0264095109504202	78.4720084739316	60.8924263718371	85.6941409505532	138.009409031809	161.203786058015	170.080690803784
FBgn0031258	273.532598321549	0.591112070110844	0.19122808410095	3.09113628832255	0.00199392091709991	0.0264095109504202	416.13943887691	323.793060866118	489.994703383933	570.303587322621	646.02720277385	635.268275584995
FBgn0016797	955.716549741381	0.75679663654982	0.244916301308824	3.09002149920412	0.00200142007455897	0.0264371453365226	1684.7702425388	1041.93707347366	1622.69546389701	2407.04645752537	2390.17944440907	2550.08399986601
FBgn0052432	714.369549374856	0.757951736284677	0.245293973548646	3.08997292236518	0.00200174743747754	0.0264371453365226	1360.18148021481	818.664843443588	1223.88811562713	1848.92017099967	1999.89659395282	1903.55210237348
FBgn0035336	114.175612399096	0.754738584008535	0.244286814155501	3.0895592405086	0.00200453726201854	0.0264371453365226	28.5352758087024	43.494590265598	56.0307844676694	62.9160541174421	65.4511612566377	88.9826130695295
FBgn0037081	424.321046544117	0.405584298334478	0.131399511083113	3.08664998059193	0.00202425799698494	0.0266594204758725	387.604163068207	335.391618270278	438.358490247061	518.550058935693	501.792236300889	515.87388336512
FBgn0052856	63.8240796376014	-0.772036595990866	0.250557942685091	-3.08126969641184	0.00206119859794456	0.0270705297329877	47.558793014504	86.9891805311959	56.0307844676694	34.5023522579521	46.0582245880043	32.6645035318526
FBgn0085279	87.6661404796713	-0.629882614896367	0.204429436929602	-3.08117375049697	0.00206186293186875	0.0270705297329877	103.440374806546	103.420470187088	86.7927837832526	66.9751543830836	60.6029270894794	61.9499204914446
FBgn0004607	986.878485630794	0.668394814238323	0.216952635520701	3.08083288610037	0.0020642246814658	0.0270705297329877	1951.09948342003	1244.91182804645	1632.58324939131	2461.84431111153	2719.85936777583	2490.38680375607
FBgn0266100	261.546848912666	1.05359260167238	0.342055119906005	3.08018369075107	0.00206872963154946	0.0270705297329877	521.957753334181	242.603159037002	403.20191960068	784.421126335206	793.89834487218	843.6452808744
FBgn0039396	25.6638818050356	1.07183650392292	0.347999269351566	3.07999642045253	0.00207003082815168	0.0270705297329877	41.613943887691	34.7956722124784	23.0714994866874	69.0047045159043	64.2391027148481	75.466266780487
FBgn0053978	594.832252631019	0.670496595163684	0.217735858473543	3.0794036400998	0.00207415455184243	0.0270775852304862	1046.29344631909	850.560876305027	811.897053364857	1439.9658192363	1405.98790847592	1464.2708479796
FBgn0083956	2352.50976268625	0.659552860653055	0.214232675964381	3.07867535932154	0.00207923121086568	0.0270775852304862	4834.35130992433	2881.27496848328	3785.92320148213	5964.84784036008	5838.48599580044	6361.69365337598
FBgn0000405	6282.50040300952	-2.47041395481346	0.802459514929709	-3.07855276042163	0.00208008693642573	0.0270775852304862	8.32278877753819	14.4981967551993	114.258854600738	8.11820053128286	13.3326439596855	3.37908657226061
FBgn0029858	107.67154358735	-0.629327758726109	0.204443522430504	-3.07824748490153	0.00208221912667214	0.0270775852304862	83.2278877753819	89.8888198822358	71.411784125461	47.6944281212868	64.2391027148481	47.3072120116486
FBgn0039130	274.379896372982	-0.388389639182227	0.126255805689225	-3.07621211604508	0.00209648643550434	0.0272146783252579	190.235172058016	217.47295132799	173.585567566505	135.979858898988	153.931434807278	156.564344514742
FBgn0046692	841.419148660582	0.426191369252318	0.13855783707631	3.07590951363937	0.00209861522469455	0.0272146783252579	802.554632119755	689.147619097141	750.37305473369	963.021538023429	1030.24976052115	1018.2314204412
FBgn0261244	432.586748239412	0.550035377261414	0.178915143119289	3.07428073259671	0.00211010769151267	0.027325600718224	523.146723159544	401.116776893848	499.882488878227	720.490297151354	713.902481114067	648.784621874038
FBgn0052271	39.5142181836508	-0.815152426413291	0.265254407480974	-3.07309663260452	0.0021184987472622	0.027396107582815	91.5506765529202	117.918666942288	83.4968552851544	50.7387533205179	50.9064587551627	65.3290070637052
FBgn0024806	691.843193132011	0.515992244580539	0.167989586122176	3.07157280693141	0.00212934227619895	0.0274723945911804	684.846619408857	531.600547690642	692.144984600622	850.381505651879	935.709194261561	941.638791469957
FBgn0034476	178.630301065244	0.553209874507807	0.180114316329337	3.07143755022931	0.00213030721663165	0.0274723945911804	330.533611450803	256.134809341855	296.633564828838	447.515804286967	442.401367753199	404.36402648052
FBgn0052625	66.4686079335456	-1.12111315332671	0.365131649737676	-3.07043542824117	0.00213746899666834	0.0275265744196984	20.2124870311642	26.0967541593588	30.7619993155832	15.2216259961554	16.9688195850542	3.37908657226061
FBgn0262739	1495.56008375162	0.780002498872823	0.254202118030651	3.06843430304846	0.00215183636795897	0.0275982978633045	2074.75234525774	1155.02300816421	1621.59682106432	2822.0894596872	2841.06522195479	2664.97294332287
FBgn0029117	154.156812149356	-0.554139410455601	0.180607459668184	-3.0681978002109	0.00215354021247303	0.0275982978633045	122.463892012348	148.84815335338	126.343925760431	87.2706557112907	93.3285077177982	91.2353374510365
FBgn0053294	25.9439402567711	0.766978912406881	0.249977476899196	3.06819207042467	0.00215358150708654	0.0275982978633045	28.5352758087024	36.7287651131716	27.466070817485	54.7978535861593	52.1185172969523	51.8126607746627
FBgn0027054	374.095083751944	-0.354922277041574	0.115684939660278	-3.06800762557205	0.00215491119044516	0.0275982978633045	286.541727912386	315.094142812999	274.66070817485	234.413040340792	246.047883983286	206.124280907897
FBgn0029937	238.856437877812	-0.383262086441852	0.124978325485591	-3.06662843299209	0.00216487782417814	0.0276556058749489	272.274090008035	295.763213806066	294.436279163439	232.383490207972	220.594654605705	208.377005289404
FBgn0023407	1586.90743863862	0.592266578006917	0.19313958600295	3.06652090471951	0.00216565664237949	0.0276556058749489	2240.01915098314	1544.5412276539	2073.13902530377	2922.55219126183	2991.3604811367	2915.02534967016
FBgn0031835	709.117729142797	0.878964306402971	0.28673212933699	3.06545453568597	0.0021733941794211	0.0276556058749489	1411.30718270541	757.772417071751	1185.43561648265	2017.37283202379	2106.5577456303	2043.22101402692
FBgn0004403	4678.5212511559	-0.488688453472949	0.159441079711879	-3.06500968480672	0.00217662948665384	0.0276556058749489	4952.05932263523	6077.64407977955	4277.01654769877	3742.4904449214	3616.78268870013	3550.29362525515
FBgn0014073	175.506248192116	0.446942337903136	0.145829021397977	3.064838079681	0.00217787871434393	0.0276556058749489	286.541727912386	236.803880334922	221.925852205279	321.683696052083	336.952274617505	355.930452278118
FBgn0035374	272.672446374154	-0.456993302791629	0.149116244915805	-3.0646781847924	0.00217904328688819	0.0276556058749489	217.581478041356	190.409650718284	169.190996235708	171.49698622335	119.993795637169	126.152565364396
FBgn0260741	176.928613761273	-0.452932444647743	0.147798890601913	-3.06451856846266	0.00218020639990724	0.0276556058749489	117.708012710897	122.751399194021	110.962926102639	80.1672302464182	89.6923320924295	87.8562508787759
FBgn0039642	101.049823513046	-0.655663409868842	0.214051299622484	-3.06311342666555	0.00219047015333236	0.0277479448033846	59.44849126813	87.9557269815425	73.6090697908598	48.7092031876971	52.1185172969523	40.5490388671274
FBgn0035101	328.737224682719	0.483064606816433	0.15788868268957	3.05952648782434	0.00221687183274546	0.0280441827222684	362.635796735593	258.067902242548	342.776563802213	426.20552789235	463.006362963622	455.050325064429
FBgn0036544	336.767221181709	0.851917963496622	0.278621537608255	3.05761704859452	0.0022310449095737	0.0281495890150852	621.831218664639	361.488372429636	570.195630170989	923.445310433425	1003.58447260178	875.183422215499
FBgn0003301	679.874265288071	0.851626805223197	0.278528934532438	3.05758827768759	0.00223125909917378	0.0281495890150852	1284.08741139161	718.14401260754	1161.26547416327	1841.8167455348	1948.99013519766	1915.94208647177
FBgn0083940	151.394594094438	0.450419737907486	0.147464937195032	3.05441921635769	0.00225496735651772	0.0284101442830647	141.487409218149	141.115781750607	149.415425247118	169.46743609053	201.201717937072	220.766989387693
FBgn0032083	33.9985963315252	0.738297451296465	0.241966234262385	3.05124164760883	0.00227897079195406	0.0285491934197943	67.7712800456682	56.059694120104	57.1294273003688	113.65480743796	95.7526248013774	91.2353374510365
FBgn0033381	148.559707790824	-0.651262806420566	0.213456911338049	-3.05102703088011	0.00228060042043891	0.0285491934197943	78.4720084739316	92.7884592332756	87.891426615952	61.9012790510318	58.1788100059002	45.0544876301415
FBgn0264449	428.387561138656	0.986156209150765	0.323224505262892	3.05099456598652	0.00228084702591305	0.0285491934197943	626.58709796609	318.960328614385	499.882488878227	826.026904058031	1039.94622885547	995.704176626127
FBgn0264907	140.605550406949	0.481800518708352	0.157917594422975	3.05096161367473	0.00228109735882844	0.0285491934197943	208.069719438455	134.34995659818	180.177424562702	246.590341137717	253.320235234024	226.398800341461
FBgn0052529	745.56641454202	0.586333379585369	0.192205423192153	3.05055585762112	0.00228418187989237	0.0285491934197943	1341.15796300901	827.363761496708	1061.28897638762	1558.69450200631	1673.85284621142	1614.07701934982
FBgn0051211	295.374091035864	0.643207602341849	0.210904691217502	3.04975483773625	0.00229028238040259	0.0285491934197943	449.430593987063	273.532645448094	393.314134106385	576.392237721083	552.698695056052	611.614669579171
FBgn0022023	1884.12219578546	-0.390857080972673	0.128165350328338	-3.04963143292133	0.00229122354679712	0.0285491934197943	1689.52612184025	2014.28280252236	1565.56603659665	1362.84291418911	1358.71762534613	1298.69560593883
FBgn0029594	242.245950204919	-0.413343059777775	0.135540590812054	-3.04958874165549	0.00229154922097818	0.0285491934197943	209.258689263817	240.670066136309	208.742138212886	155.260585160785	173.324371475911	167.827966422277
FBgn0011300	438.817459549775	0.638400103480844	0.209358526097952	3.04931504524519	0.00229363814633108	0.0285491934197943	474.398960319677	329.592339568198	498.783846045528	633.219641440063	713.902481114067	679.196401024383
FBgn0027493	1939.60387171428	-0.410368488554255	0.134625641524463	-3.04821937267935	0.00230201809663478	0.0286037160792391	1992.71342730772	2106.10471530529	1790.78781730002	1502.88187335374	1505.37670890267	1423.72180911247
FBgn0051450	214.694106662217	-0.657300893766281	0.215659119818451	-3.04786968582464	0.0023046984778171	0.0286037160792391	97.4955256797331	112.119388240208	94.4832836121484	82.1967803792389	55.754692922321	54.0653851561698
FBgn0028743	99.3095171349144	0.871750545618216	0.286050803338228	3.04753748440781	0.00230724747896637	0.0286037160792391	177.156503979027	70.5578908753034	117.554783098836	242.531240872075	229.079064398232	193.734296809608
FBgn0038080	116.032362488034	-0.741454266470084	0.243446519421471	-3.04565564639036	0.00232173574090758	0.0287450052183204	114.14110323481	110.186295339515	72.5104269581604	63.9308291838525	59.3908685476898	54.0653851561698
FBgn0030060	1038.82609928184	-0.392652702377474	0.128952982630624	-3.0449292010732	0.00232735089520634	0.0287762082761018	1477.88949292571	1636.36314043683	1397.47368319364	1145.68104997729	1142.97120490758	1148.88943456861
FBgn0035335	190.946911840164	-0.573900227919727	0.188529371537516	-3.04408922195725	0.00233385912664253	0.0288183561215434	145.054318694237	175.911453963085	127.44256859313	114.66958250437	86.0561564670607	100.246234977065
FBgn0033184	267.554082521902	-0.438619831850307	0.144128142691565	-3.043262916313	0.00234027767262764	0.0288592862070183	284.163788261661	300.595946057799	244.997351691966	216.147089145406	201.201717937072	194.860659000362
FBgn0029665	185.425638805411	-0.542960530093109	0.178450826918044	-3.0426338699034	0.00234517478813151	0.0288813710993997	127.219771313798	168.179082360312	132.935782756627	109.595707172319	99.3888004267462	85.6035264972688
FBgn0259242	179.573104400185	0.980232921803264	0.322453307139851	3.03992206033764	0.00236639378315055	0.0291041394123463	369.769615687768	148.84815335338	286.745779334543	477.959056279278	545.426343805314	563.181095376769
FBgn0035102	106.497975597451	-0.588588528469202	0.193653879668052	-3.03938412944848	0.00237062374668008	0.0291176480800943	108.196254107997	124.684492094714	114.258854600738	90.3149809105218	67.8752783402169	72.0871802082264
FBgn0011676	145.358404029365	0.756794544157216	0.249076271125693	3.03840482570621	0.00237834217691242	0.0291739123495141	280.596878785573	171.078721711352	242.800066026567	380.540649903884	420.584314000987	370.573160757914
FBgn0052016	1127.90212535093	0.537767016685482	0.177029961555698	3.03771752509977	0.00238377290231731	0.0292020032223272	819.200209674831	587.660241810746	772.345911387678	1018.834166676	1105.3973901121	1037.37957768401
FBgn0004876	951.922765357421	0.684629725688423	0.225424221886788	3.03707259121541	0.00238887918779209	0.0292260509053827	930.963373258915	712.34473390546	1037.11883406823	1328.34056193116	1410.83614264308	1567.89616952892
FBgn0261929	111.575411666494	1.19787699701063	0.394714003768592	3.0347973103911	0.00240697388041544	0.0294087294876514	222.337357342806	88.9222734318892	162.599139239511	329.801896583366	361.193445453297	394.226766763738
FBgn0030628	156.97601583578	-0.792690212939469	0.261358609020713	-3.03296002343144	0.00242167678702217	0.0295246003790871	64.2043705695804	69.5913444249567	51.6362131368718	44.6501029220557	30.3014635447397	31.538141341099
FBgn0259821	421.216319911566	0.511057273519246	0.168508988300285	3.0328190719924	0.00242280814037894	0.0295246003790871	775.208326136415	585.727148910053	807.502482034059	1053.33651893395	1092.06474615242	942.765153660711
FBgn0035170	59.2629836102457	0.89179099537518	0.294172880952103	3.0315200792434	0.00243325736200898	0.0296030778819982	110.574193758722	65.7251586235703	106.568354771842	175.556086488992	151.507317723698	195.987021191116
FBgn0027101	930.668546683133	0.609644902321545	0.201137247298311	3.03098958800687	0.00243753653279327	0.0296030778819982	1178.26909693434	837.029226000174	1056.89440505682	1606.3889301276	1575.67610432646	1503.69352465597
FBgn0023531	395.750232893795	0.756227452840141	0.249511407452366	3.03083318138275	0.00243879948995597	0.0296030778819982	686.03558923422	410.782241397314	599.858986653873	917.356660034963	924.800667385455	1021.61050701346
FBgn0283494	1152.0608420814	-0.29747893830291	0.09816562092323	-3.03037800306435	0.0024424783864481	0.0296090795791322	1048.67138596981	1068.03382763302	901.985765646208	889.957733241883	746.628061742386	817.738950487068
FBgn0053180	727.841917185995	0.437043392553337	0.144297644477245	3.02876317999949	0.00245557090839809	0.0297275959911313	570.705516174048	506.47033998163	654.791128288843	782.391576202385	742.991886117017	817.738950487068
FBgn0286213	7208.77706213006	-0.526120147912031	0.173729631862802	-3.02838463577428	0.00245864931352764	0.0297275959911313	5971.00646297097	7965.30929730651	5565.72459045516	4706.52675801124	4454.31514107673	4382.67528422201
FBgn0030342	244.551513841893	-0.394319444030335	0.13038173744024	-3.02434567733131	0.00249171556896723	0.0300882744938407	192.613111708741	233.904240983882	183.4733530608	160.334460492836	162.415844599805	143.047998225699
FBgn0039685	69.9447651817043	-1.4774244640557	0.488656395170453	-3.02344239972619	0.00249916599545659	0.0301143806405796	102.251404981184	230.038055182496	156.007282243315	43.6353278556454	69.0873368820065	63.0762826821981
FBgn0262483	393.16760256051	0.935545655189008	0.30944535158898	3.02329846089155	0.00250035511448994	0.0301143806405796	801.365662294392	371.153836933103	596.563058155774	1059.42516933241	1187.8173709538	1134.24672608881
FBgn0027580	3204.02148953025	0.656090146796011	0.217056517960268	3.02266963904814	0.00250555606020332	0.0301379822092761	4917.57919769971	3473.76794254576	4996.62760311687	6502.67862555757	6922.06633216033	7670.52651903159
FBgn0043806	412.783945166733	-0.583372971526373	0.193140607526631	-3.02045737039496	0.00252393234762771	0.0302521546380476	797.798752818304	973.312275499048	785.529625380071	608.865039846214	567.243397557527	530.516591844916
FBgn0028481	489.071117999524	0.856392014117448	0.283542054439702	3.02033508154456	0.00252495173093537	0.0302521546380476	1080.7735712546	537.399826392721	766.852697224181	1441.99536936912	1455.68230868929	1418.0899981587
FBgn0263864	373.74839040325	0.361820139904096	0.119805708514626	3.02005759483426	0.00252726621953073	0.0302521546380476	404.249740623284	357.62218662825	420.78020492387	508.402308271589	516.336938802364	493.346639550049
FBgn0263490	758.231606900059	0.665577628407019	0.220401996760297	3.01983483902318	0.00252912560723358	0.0302521546380476	678.901770282044	492.938689676777	610.845414980867	831.100779390082	981.767418849566	1013.72597167818
FBgn0030571	99.8080173561496	-0.504601824566227	0.167110345819008	-3.0195726188775	0.00253131601510013	0.0302521546380476	137.920499742062	130.483770796794	114.258854600738	97.4184063753943	82.4199808416919	88.9826130695295
FBgn0015269	801.558925317289	0.716716085472416	0.237449680476434	3.01839145049323	0.00254120421621619	0.0303008785649406	1036.78168771619	652.418853983969	961.312478611975	1404.44869191193	1460.53054285645	1489.05081617618
FBgn0035266	1177.54827235172	0.45372071988923	0.150340452606033	3.01795499497533	0.00254486695208858	0.0303008785649406	1366.12632934163	1056.43527022886	1186.53425931535	1621.61055612375	1501.7405332773	1816.82221368546
FBgn0266354	623.22329327874	1.23340391164654	0.408739526640896	3.01757924363935	0.00254802412533819	0.0303008785649406	1234.15067872638	425.280438152513	948.128764619583	1971.70795403532	2052.01511124977	2105.17093451836
FBgn0050428	111.378494020003	0.437083942446238	0.144863235851913	3.01721785983747	0.00255106395729982	0.0303008785649406	153.377107471775	114.052481140901	146.11949674902	204.984563414892	190.293191060965	161.069793277756
FBgn0051992	3416.61718412278	0.631209492022333	0.209232768058586	3.01678125218699	0.00255474096949173	0.0303008785649406	3308.90302398411	2260.75214736075	3421.17378102593	4475.15804286967	4691.87861526749	4756.62753155219
FBgn0051163	678.22522096923	1.11431479505895	0.36937506977717	3.01675691250948	0.00255494609538755	0.0303008785649406	764.507597708151	343.123989873051	565.801058840191	1142.63672477806	1216.90677595675	1261.52565364396
FBgn0082582	639.848852497131	0.277097014907783	0.091892747240287	3.01543944685005	0.00256607171290081	0.0303390886035568	770.452446834964	780.002985429723	848.152266843937	918.371435101373	1012.06888239431	977.682381574071
FBgn0062928	284.158430022314	-0.660624491848064	0.219086737954355	-3.01535591800952	0.00256677858115588	0.0303390886035568	198.557960835554	312.194503461959	218.629923707181	164.393560758478	149.083200640119	148.679809179467
FBgn0036825	8180.59380917251	-0.454547624753494	0.150751227883605	-3.01521673245973	0.00256795684351465	0.0303390886035568	8250.26161819108	9648.06666735997	7047.79377176665	6275.36901068165	5943.93508893614	5985.4886816643
FBgn0033902	2641.52358185921	-0.416696628121697	0.138238306316975	-3.01433545609441	0.0025754286943051	0.0303887512685899	2286.38897417228	2947.9666735572	2373.0685186307	1963.58975350404	1838.6928078948	1897.92029141971
FBgn0004611	1080.50904839564	0.538650818610549	0.178777538629362	3.012966968559	0.00258707074826135	0.0304874319611332	1533.77107471775	1218.81507388709	1666.64117720499	2026.50580762148	2164.7365556362	2226.81805111974
FBgn0029888	570.6123994293	-0.450440610048211	0.149602522623419	-3.01091587327083	0.00260461004194298	0.0306006887192707	754.995839105251	816.731750542895	617.437271977063	556.096736392876	504.216353384468	541.780213752452
FBgn0023479	2068.5974482772	0.769501140914337	0.255595904088882	3.01061608814649	0.00260718264628399	0.0306006887192707	3396.88679106095	2259.7856009104	3266.26514161532	5021.10702859845	4923.3817967493	5264.61687958203
FBgn0285948	11920.9954203389	-0.492218131951701	0.163503660595356	-3.01044105165241	0.00260868579494043	0.0306006887192707	10216.8177093408	13019.380686169	9460.41343237454	8128.34828194696	7526.88354451334	7590.55480348809
FBgn0003862	1908.30269902718	0.567867466518473	0.18864110807706	3.01030603725301	0.00260984578988832	0.0306006887192707	2281.63309487083	1836.43825565858	2470.84773074095	3034.17744856697	3402.24832680337	3329.52663586746
FBgn0031738	621.624844939464	0.671822231989657	0.223229201524254	3.00956249183494	0.00261624251747787	0.0306209463497265	757.373778755976	440.745181358059	737.189340741298	1007.67164094548	1042.37034593905	1030.62140453949
FBgn0004649	3470.26893341297	-4.58413326653402	1.52330191507698	-3.00933992215349	0.00261816007184691	0.0306209463497265	1.1889698253626	0.966546450346621	129.639854258529	3.04432519923107	2.42411708357917	0
FBgn0086677	131.006876453077	1.20332811631716	0.400045152905181	3.00798074311971	0.00262989801868854	0.0307195876605101	275.840999484123	112.119388240208	175.782853231904	408.954351763374	492.095767966573	395.353128954492
FBgn0015576	606.707363028502	0.373385217169598	0.124152265085764	3.0074780908078	0.00263425112337483	0.0307270087635169	915.506765529201	934.650417485183	1018.44190591234	1149.74015024293	1191.45354657916	1375.28823491007
FBgn0051262	152.476695092413	1.0012564200419	0.332959184580757	3.00714461834901	0.00263714271814224	0.0307270087635169	14.2676379043512	11.5985574041595	12.0850711596934	27.3989267930796	24.2411708357917	23.6536060058243
FBgn0035755	176.901898384596	0.394988581619739	0.131442032342017	3.0050401274378	0.00265545813804486	0.0308814918763423	265.14027105586	253.235169990815	277.956636672948	347.053072712342	351.49697711898	348.045916942843
FBgn0037153	340.093301742048	1.08009906709897	0.359450885410174	3.00485855213975	0.00265704382674487	0.0308814918763423	601.618731633475	302.529038958492	577.886129999885	970.124963488301	1086.00445344347	1075.67589216963
FBgn0032456	2053.06061895885	0.45072485503355	0.150057255835753	3.00368584326836	0.0026673059012692	0.0309370248128194	1884.51717319972	1513.61174124281	1934.71002838364	2297.45075035305	2431.38943482991	2557.96853520128
FBgn0030955	188.096032973494	-0.907636214949426	0.302187580501448	-3.00355234137453	0.00266847643577986	0.0309370248128194	42.8029137130536	79.2568089284229	53.8334988022706	31.4580270587211	29.0894050029501	33.7908657226061
FBgn0035290	844.272113029878	0.707394404739214	0.23558125215719	3.00276188474968	0.00267541672409675	0.0309559189436092	1401.7954241025	1101.86295339515	1466.6881816537	2260.91884796228	1945.35395957229	2275.25162532215
FBgn0034261	541.114300587714	0.422194759568804	0.140609323533213	3.00260856790963	0.00267676476991415	0.0309559189436092	726.460563296548	584.760602459706	760.260840227985	941.711261628811	924.800667385455	906.721563556598
FBgn0033915	707.293445133832	0.440516437463034	0.146827500613039	3.00023112580255	0.00269774814430883	0.0311367235976713	653.93340394943	530.634001240295	644.903342794548	788.480226600847	822.98774987513	869.551611261731
FBgn0020300	76.9762277863652	0.525299946920146	0.17510291546052	2.9999497469166	0.00270024152493357	0.0311367235976713	86.7947972514697	104.387016637435	95.5819264448478	131.920758633346	136.962615222223	145.300722607206
FBgn0267975	732.039173709381	0.430526599895501	0.143540912701309	2.99933023828108	0.0027057385957588	0.0311367235976713	793.042873516854	703.64581585234	788.825553878169	1020.86371680882	1041.15828739726	1017.10505825044
FBgn0028879	243.894679462182	0.945892026475653	0.315435012012062	2.99869066671483	0.00271142441635537	0.0311367235976713	438.729865558799	258.067902242548	395.511419771784	666.707218631605	749.052178825965	687.080936359658
FBgn0083983	78.2178350681774	-0.748551130604503	0.249631924959777	-2.9986193902287	0.00271205874324691	0.0311367235976713	47.558793014504	70.5578908753034	58.2280701330682	37.5466774571832	39.9979318790564	28.1590547688384
FBgn0037358	867.838596951319	-0.460388715670947	0.153536051321386	-2.99857077024372	0.00271249151582209	0.0311367235976713	876.270761292236	1025.50578381777	777.839125551175	699.180020756736	612.089563603742	636.394637775749
FBgn0002921	4755.22296400939	0.639656220652138	0.213399417996606	2.99746000554843	0.00272239577512042	0.0312118815253633	7530.9348738467	4958.38329027817	5748.09930068326	9427.26036695222	10022.5120820581	8961.33758963514
FBgn0085478	463.672693960547	0.794224770192351	0.26501094608929	2.99695081245721	0.00272694708874685	0.031225559151685	640.854735870441	397.250591092461	631.719628802155	895.031608573935	985.403594474935	1013.72597167818
FBgn0261854	955.764985762049	0.546244911537177	0.182374457151944	2.99518320749313	0.00274280045252018	0.0313684607718729	1029.64786876401	652.418853983969	966.805692775472	1282.67568394269	1335.68851305213	1246.88294516417
FBgn0026418	2562.38155965758	0.35304123935046	0.117940247178475	2.99339070246491	0.00275896308445417	0.0315145439302886	1621.75484179459	1354.13157693562	1593.03210741413	1781.94501661659	1985.35189145134	2066.87462003274
FBgn0039269	334.58767929133	-0.633518068743989	0.211675198629412	-2.99287811158791	0.00276360097649514	0.0315287875821494	269.89615035731	386.618580138648	276.857993840249	209.043663680534	193.929366686334	199.366107763376
FBgn0039941	232.563430391714	0.375224850576181	0.125412263670555	2.99193108866815	0.0027721883213806	0.0315879987894569	235.416025421795	304.462131859186	301.028136159636	362.274698708497	373.314030871193	358.183176659625
FBgn0266420	468.354386291069	-0.778822708305144	0.260376630900248	-2.99113904966193	0.00277938902294655	0.031631284131404	33.2911551101528	60.8924263718371	49.438927471473	27.3989267930796	32.7255806283189	24.7799681965778
FBgn0032330	381.090251489743	0.720839578757922	0.241068139745396	2.99019015751827	0.00278803822180667	0.0316909283451815	425.651197479811	313.161049912305	486.698774885834	591.613863717238	719.962773823015	707.355455793221
FBgn0283499	1132.04408726886	0.601825568769751	0.201433422682864	2.98771455478499	0.00281071931670446	0.0318827918976157	1427.95276026048	949.148614240382	1547.98775127346	1987.94435509789	2033.83423312293	1932.83751933307
FBgn0260499	352.070706327102	1.01399226411227	0.339400308739928	2.98759971043296	0.00281177558142018	0.0318827918976157	687.224559059582	375.986569184836	495.48791754743	1075.66157039498	1038.73417031368	1031.74776673024
FBgn0005391	188358.604112894	0.444994893334204	0.149003729894704	2.98646814847298	0.00282220236088201	0.0319620433026565	273461.870863572	229682.366088768	281504.154379735	347310.82557921	330969.553655232	389866.618723331
FBgn0086691	999.027033808675	-0.445491738117614	0.149219772728959	-2.98547390852014	0.00283139291344087	0.032017915434714	1360.18148021481	1895.39758912972	1407.36146868793	1207.58232902832	1014.49299947788	1202.95481972478
FBgn0044030	138.615563836199	-0.593655240737185	0.198866823227774	-2.98518994320755	0.00283402284392016	0.032017915434714	96.3065558543705	128.550677896101	74.7077126235592	72.0490297151353	59.3908685476898	67.5817314452123
FBgn0004167	2761.70756981014	0.411743298081471	0.13804656658429	2.98264062822644	0.00285773328584506	0.0322466069075089	3091.32154594276	2526.55242120607	3462.92220866851	3651.16068894446	3916.16114852216	4511.08057396792
FBgn0034911	200.852495157307	1.05110624219948	0.353030249636824	2.97738293894303	0.00290720640716268	0.0327650971803619	401.871800972559	185.576918466551	319.705064315526	611.909365045445	653.299554024588	612.741031769924
FBgn0011297	228.266109159798	-0.384297846665715	0.129117134173085	-2.97635049853689	0.00291701267612415	0.0328358158142885	206.880749613092	232.937694533536	215.333995209082	173.526536356171	153.931434807278	174.586139566798
FBgn0085420	94.7465292898123	1.03276555567442	0.347167728067864	2.97483167984017	0.00293149351582568	0.0329486589239452	179.534443629753	90.8553663325824	146.11949674902	296.314319391824	286.045815862343	268.074201399342
FBgn0035625	524.340698192601	0.577081300119671	0.194026252671254	2.97424339322495	0.00293712000836035	0.0329486589239452	934.530282735003	607.957717268025	895.393908650011	1143.65149984447	1235.08765408359	1255.89384269019
FBgn0283521	4443.34144447445	0.620714367248149	0.208700578337555	2.97418613878586	0.00293766812733389	0.0329486589239452	4699.99771965835	3091.98209465884	4133.09433661514	6054.14804620419	6428.75850565197	5851.45158096463
FBgn0054003	84.4526278807412	-0.998013440960446	0.335876746743792	-2.97136807068617	0.00296476223409728	0.0332054480867555	86.7947972514697	180.744186214818	141.724925418223	79.1524551800078	60.6029270894794	65.3290070637052
FBgn0004861	134.835995379245	0.497364563875637	0.167402881436819	2.97106333897455	0.00296770567434866	0.0332054480867555	202.124870311642	170.112175261005	254.885137186261	263.841517266693	303.014635447397	317.634137792498
FBgn0038295	168.598527276562	1.0058754655938	0.338631019978863	2.97041737539752	0.00297395393274532	0.0332353649839736	342.423309704429	123.717945644368	266.970208345954	502.313657873127	492.095767966573	475.324844497993
FBgn0085407	315.549034022149	1.11734973425408	0.376260671199973	2.96961606614536	0.00298172149324382	0.0332821686004574	576.650365300861	282.231563501213	464.725918231846	979.257939085995	964.798599264512	925.869720799408
FBgn0261444	701.747888468811	0.496139668861146	0.167131142510668	2.96856505261715	0.00299193764399208	0.0333391786435522	1165.19042885535	837.995772450521	1042.61204823173	1377.04976511885	1472.65112827435	1443.99632854604
FBgn0038826	2110.37394544709	0.727204412786308	0.244986063560818	2.96835012660129	0.00299403071483061	0.0333391786435522	3694.1292474016	2582.61211532617	3055.32571773703	5237.25411774385	5359.72287179356	4850.11559338473
FBgn0033192	354.022890330837	1.04227355951835	0.351172066372447	2.96798538188095	0.00299758586212193	0.0333391786435522	630.154007442178	339.257804071664	593.267129657676	1041.15921813703	1109.03356573747	1066.6649946436
FBgn0033639	523.644758856259	0.393542282356428	0.13261381331725	2.96758137415869	0.00300152819876179	0.0333431412091841	565.949636872597	420.44770590078	605.35220081737	719.475522084943	688.449251736486	679.196401024383
FBgn0027496	502.760473327654	-0.49952029988313	0.168397281604549	-2.96632044842721	0.00301386284101473	0.0334402108541229	433.973986257349	478.440492921578	393.314134106385	351.112172977984	301.802576905607	270.326925780849
FBgn0031865	157.743474653958	0.575979416615075	0.19422146482367	2.96558064340621	0.0030211212755083	0.0334712463675336	98.6844955050957	84.089541180156	99.9764977756454	124.817333168474	144.234966472961	152.058895751728
FBgn0031381	1128.00216264756	-0.534987232137726	0.180430643542373	-2.96505749596846	0.00302626364249017	0.0334712463675336	1161.62351937926	1570.63798181326	1121.71433218609	962.006762957019	859.349506128817	839.139832111385
FBgn0264087	840.855681981503	0.617389462264888	0.208248403606181	2.96467800748396	0.00302999888428476	0.0334712463675336	1626.51072109604	1063.20109538128	1434.82753950542	1947.35335244148	2231.39977543463	2146.84633557624
FBgn0004842	22.2497329452955	0.903236141086497	0.30467691251938	2.96457034967834	0.00303105930753531	0.0334712463675336	26.1573361579772	16.4312896558926	17.5782853231904	35.5171273243625	38.7858733372668	37.1699522948667
FBgn0024558	605.688622576093	-0.42490285574991	0.14336452957509	-2.96379346418013	0.0030387216261567	0.0334882804369029	217.581478041356	268.699913196361	210.939423878285	164.393560758478	197.565542311703	159.943431087002
FBgn0263846	141.281860619892	0.803027736834919	0.270964291555519	2.96359248011978	0.00304070677966854	0.0334882804369029	272.274090008035	173.978361062392	240.602780361169	391.703175634398	412.09990420846	393.100404572985
FBgn0028737	4822.86290646945	-0.434657344956302	0.146693091919424	-2.96303894933957	0.00304618021305254	0.0334882804369029	3264.9111404457	4135.85226103319	3091.58093121611	2730.75970371027	2557.44352317603	2475.74409527628
FBgn0013759	982.363943805096	0.694733399430712	0.234473131801014	2.96295526099041	0.00304700852329747	0.0334882804369029	1564.68429017718	945.282428438996	1337.04832739517	2033.60923308636	2083.5286333363	2107.42365889987
FBgn0030510	271.768275841927	-0.622368420772106	0.210197467991654	-2.96087496542451	0.0030676645007312	0.0336570758183069	230.660146120344	300.595946057799	206.544852547487	165.408335824888	163.627903141594	150.932533560974
FBgn0029930	78.9939632320609	0.849477170205717	0.286963466512698	2.96022758760523	0.00307411854486738	0.0336570758183069	124.841831663073	77.3237160277297	143.922211083621	186.718612219506	219.382596063915	216.261540624679
FBgn0039205	91.0068274908285	-0.849437737208214	0.286967846738255	-2.96004499062569	0.00307594118607062	0.0336570758183069	104.629344631909	150.781246254073	120.850711596934	88.2854307777011	60.6029270894794	59.6971961099375
FBgn0032421	194.101690160196	-0.573829264091101	0.19388106536807	-2.95969729174803	0.00307941456165275	0.0336570758183069	102.251404981184	116.952120491941	104.371069106443	61.9012790510318	86.0561564670607	70.9608180174729
FBgn0034718	369.581834336512	0.441235045967546	0.14910337535991	2.95925591826799	0.00308382886148506	0.0336570758183069	387.604163068207	356.655640177903	441.654418745159	497.239782541075	574.515748808264	538.401127180191
FBgn0002593	11116.5328653567	-0.441753100833429	0.149279732333645	-2.95923025803727	0.00308408567403716	0.0336570758183069	11737.5101159796	14171.5040549822	10942.482613686	9837.229493782	8736.51796921935	8558.09992534538
FBgn0035424	909.487500822049	0.814308594961496	0.27523986146825	2.95854165387825	0.00309098464552738	0.0336928197351859	1043.91550666836	640.82029657981	861.33598083633	1395.31571631424	1605.9775678712	1474.40810769638
FBgn0030505	731.614289086303	0.635945900724792	0.215040037645102	2.95733719026939	0.00310308574014039	0.0337695534965568	1073.63975230243	729.742570011699	964.608407110074	1365.88723938834	1475.07524535793	1458.63903702583
FBgn0039757	14160.1457763678	-0.434167437521702	0.14682111831027	-2.95711844807092	0.00310528804469306	0.0337695534965568	13754.0029397945	16557.907240888	12901.3627843891	10765.7486795475	10496.4269718978	10721.8416937829
FBgn0036663	6125.29043004459	0.352963006905752	0.119452942390002	2.95482890453516	0.0031284249250638	0.033981419337901	9809.00105924144	8038.76682753285	10116.3032034961	10981.8957686929	12524.2009123118	12207.5134233868
FBgn0032202	268.342424936844	-0.557611783976637	0.188790129211853	-2.95360666526641	0.00314084044986412	0.0340764696649202	360.257857084868	466.841935517418	413.089705094975	297.329094458235	279.985523153395	265.821477017835
FBgn0051323	105.717527211616	0.661126021974492	0.223906071628957	2.95269358782762	0.00315014479747123	0.0341375831315705	175.967534153665	95.6880985843155	140.626282585523	205.999338481302	197.565542311703	245.546957584271
FBgn0003175	963.156700580384	0.535060785748938	0.181275744417874	2.95164026200618	0.0031609094958753	0.0342143614582637	1529.0151954163	1118.29424305104	1505.14068079818	1909.80667498429	2083.5286333363	2021.8201324026
FBgn0023095	860.472557124092	0.542639133641799	0.183921430407089	2.95038556649288	0.00317377588923622	0.0343136839745563	1103.36399793649	814.798657642202	1153.57497433437	1459.24654549809	1550.22287494888	1463.14448578885
FBgn0264712	236.731400201753	0.501193933270744	0.169944510190808	2.94916224541776	0.00318636649185048	0.0343968705985874	152.188137646413	135.316503048527	169.190996235708	219.191414344637	210.898186271388	215.135178433926
FBgn0030159	245.030649149432	-0.616976811251989	0.20922130367247	-2.94891963878521	0.00318886883802779	0.0343968705985874	458.942352589963	624.389006923917	428.470704752766	359.230373509266	329.679923366768	297.359618358934
FBgn0013981	3262.32522159715	-0.474418776357512	0.160917195724984	-2.94821677832565	0.00319612854847529	0.0344124117306534	3836.80562644511	4954.51710447678	3770.54220182434	3063.60592549287	2998.63283238744	2980.35435673386
FBgn0001149	3940.3364249386	-0.52167216344601	0.176963573890131	-2.94790702955566	0.00319933266287193	0.0344124117306534	4059.14298378791	5360.46661362236	4563.76232703331	3164.06865706749	3370.73480471684	3206.75315707532
FBgn0050423	429.10101041756	-0.464700493900925	0.157648177833878	-2.94770609014335	0.00320141279275276	0.0344124117306534	470.832050843589	588.626788261092	502.079774543626	398.80660109927	367.253738162245	366.0677119949
FBgn0002962	2474.60987642291	-3.56300776412211	1.20888861835279	-2.94734164093381	0.00320518872543328	0.034413215668682	1.1889698253626	0	39.5511419771784	0	3.63617562536876	0
FBgn0013531	112.030395754513	-0.714784724027506	0.242623675048235	-2.9460633793689	0.00321846445614927	0.0345158967857854	55.8815817920422	51.2269618683709	32.959284980982	37.5466774571832	23.0291122940022	23.6536060058243
FBgn0024326	643.985498611964	0.425785329880878	0.144667168172584	2.94320636298713	0.00324831810673698	0.0347959236825351	558.815817920422	423.34734525182	537.236345190007	693.091370358274	670.268373609642	674.690952261369
FBgn0036518	473.812671528665	0.504859494985175	0.17164815935903	2.94124619145597	0.00326894610731597	0.0349765948283359	555.248908444334	384.685487237955	532.841773859209	672.795869030067	768.445115494598	646.531897492531
FBgn0032002	289.927616422467	-1.05396391478401	0.358579822682691	-2.93927278701532	0.00328983384824661	0.0351596265758586	150.99916782105	303.495585408839	214.235352376383	108.580932105908	128.478205429696	85.6035264972688
FBgn0085383	303.423654475009	1.07941400436654	0.367450704715828	2.93757500125443	0.0033079014840559	0.0353121331788195	596.862852332025	252.268623540468	442.753061577858	834.145104589314	964.798599264512	929.248807371668
FBgn0015521	3585.87770850273	-0.496703919885839	0.169144390787672	-2.93656749462862	0.00331866593453427	0.0353864172698391	3313.65890328556	3822.69121112089	2781.76365239488	2405.01690739255	2340.48504419569	2284.26252284817
FBgn0259224	448.62159893616	0.609891436875385	0.20787563754135	2.93392455262617	0.00334705557268647	0.0356482505324614	727.649533121911	518.068897385789	724.005626748905	891.987283374704	1064.18739969126	1048.64319959154
FBgn0039311	155.756127160619	-0.712398004326666	0.242861654696282	-2.93334905099604	0.00335326667490161	0.0356735395231524	192.613111708741	353.756000826863	270.266136844052	158.304910360016	156.355551890857	184.72339928358
FBgn0029962	41.0596770387177	0.779333487505466	0.266054982597848	2.9292196669117	0.00339814179790801	0.0360942627796676	70.1492196963934	62.8255192725304	71.411784125461	120.758232902832	126.054088346117	103.625321549325
FBgn0263607	195.842006306421	0.384715966061885	0.131347344321506	2.92899691310237	0.00340057799472885	0.0360942627796676	231.849115945707	245.502798388042	268.068851178654	287.181343794131	303.014635447397	384.089507046956
FBgn0038387	210.064785791621	-0.458504051025527	0.156566901576708	-2.92848645791772	0.00340616670000452	0.0361123580121346	181.912383280478	166.245989459619	150.514068079818	134.965083832577	115.145561470011	111.5098568846
FBgn0265045	1103.20100348471	0.45300391329971	0.154711165874621	2.9280621779221	0.00341081828056818	0.0361170567788609	1986.7685781809	1475.91642967929	1746.84210399205	2222.35739543868	2443.51002024781	2463.35411117799
FBgn0052333	242.721961462595	0.509792128033319	0.174124927096019	2.92773778306998	0.00341437867375981	0.0361170567788609	476.776899970402	350.856361475824	480.106917889638	634.234416506473	568.455456099317	656.669157209312
FBgn0040297	107.666721267195	0.924101222439872	0.315763282646942	2.92656326186322	0.00342729794190579	0.0362125184816364	160.510926423951	105.353563087782	138.428996920124	254.708541669	287.257874404132	224.146075959954
FBgn0029502	363.861879562231	-0.395315342170211	0.135108323308551	-2.92591405540144	0.00343445803673782	0.0362469816408494	319.832883022539	436.878995556673	346.072492300311	289.210893926952	275.137288986236	275.958736734617
FBgn0014023	272.372818092433	-0.421686040755445	0.144206746835913	-2.9241769196504	0.00345368391045177	0.036369652124546	243.738814199333	271.599552547401	193.361138555094	195.851587817199	173.324371475911	159.943431087002
FBgn0051229	163.736860057907	-0.520033415376467	0.177840453244224	-2.92415705138987	0.00345390436932396	0.036369652124546	174.778564328302	193.309290069324	150.514068079818	131.920758633346	105.449093135694	123.899840982889
FBgn0034894	345.199604962099	0.370246858650914	0.12668030177221	2.92268690136746	0.00347025278564564	0.0364620241017505	254.439542627596	191.376197168631	214.235352376383	300.373419657466	294.53022565487	254.557855110299
FBgn0039647	319.572801675198	0.943736262991504	0.322902871851057	2.92266295924062	0.00347051960959875	0.0364620241017505	655.122373774792	315.094142812999	482.304203555037	917.356660034963	961.162423639143	913.479736701119
FBgn0011774	363.143994565983	-0.543255485543718	0.18591747333682	-2.92202489520456	0.00347763742184257	0.0364955674359958	117.708012710897	183.643825565858	168.092353403008	103.507056773856	126.054088346117	94.6144240232971
FBgn0025936	1598.47824776255	0.589960051936176	0.2019416608539	2.92143805018518	0.00348419559524672	0.0365231687086854	1719.25036747432	1229.4470848409	1565.56603659665	2262.9483980951	2373.21062482401	2156.98359529302
FBgn0259938	922.379513717427	0.675375749899583	0.231319754378275	2.91966309455416	0.00350409983014143	0.0366541739098416	1129.52133409447	788.701903482843	1244.76232944842	1433.87716883783	1876.26662269028	1740.22958471422
FBgn0011725	649.751826998017	0.476678881283129	0.163284403904163	2.91931666396571	0.00350799672709712	0.0366541739098416	392.360042369658	318.960328614385	446.048990075957	510.43185840441	549.062519430683	549.664749087726
FBgn0035228	1123.95258192544	-0.181285424708509	0.0621025325152484	-2.91913094951478	0.00351008739821882	0.0366541739098416	1631.26660039749	1563.87215666083	1564.46739376395	1383.13841551732	1444.77378181319	1369.6564239563
FBgn0263392	838.847934271119	0.858571076035829	0.294163252736682	2.91868908862105	0.00351506618364659	0.0366541739098416	1649.10114777793	818.664843443588	1251.35418644462	2145.2344903915	2353.81768815538	2242.58712179029
FBgn0052204	123.490012544472	0.994373166747064	0.340705553477781	2.91857046824425	0.00351640386401148	0.0366541739098416	262.762331405134	100.520830836049	183.4733530608	387.644075368756	362.405503995087	336.782295035308
FBgn0034329	581.885039135445	-0.795638727585743	0.272782556468977	-2.91675075519805	0.00353698288301977	0.0368273984841185	870.325912165423	1229.4470848409	971.20026410627	669.751543830836	592.696626935108	506.862985839092
FBgn0260444	252.800113712808	-0.454285356921184	0.155800463988435	-2.91581517340606	0.00354760591349217	0.0368594648151405	256.817482278321	262.900634494281	253.786494353561	201.940238215661	184.232898352017	177.965226139059
FBgn0028411	244.067901926562	-0.663222902056938	0.227459755677908	-2.91578129977457	0.00354799107437629	0.0368594648151405	90.3617067275575	150.781246254073	98.877854942946	70.0194795823146	72.7235125073752	73.2135423989799
FBgn0265048	719.614481620106	0.527037311544326	0.18085560678965	2.91413310817238	0.0035667778972406	0.0370064521563356	1187.78085553724	1031.30506251984	1253.55147211002	1663.21633384658	1673.85284621142	1665.88968012448
FBgn0010762	468.310732411632	0.813788862800251	0.279283750969608	2.91384249880262	0.00357009976169424	0.0370064521563356	525.524662810269	379.852754986222	463.627275399147	743.830123678792	849.653037794501	812.1071395333
FBgn0024921	1463.59390932902	0.501952727448954	0.172290626478906	2.91340705938177	0.00357508240091134	0.0370168331444028	949.986890464717	758.738963522098	1003.06090625455	1313.118935935	1273.87352742086	1251.38839392718
FBgn0040011	1363.18438124376	0.386573799092925	0.132742506883393	2.91220806484021	0.0035888349438946	0.0371178946700022	733.594382248724	733.608755813086	769.04998288958	960.991987890608	941.769486970509	1020.4841448227
FBgn0029529	143.458731544623	-0.686902686601579	0.236024228551113	-2.91030582249239	0.00361075254309968	0.0373030857174898	146.2432885196	195.242382970018	128.54121142583	111.625257305139	79.9958637581128	100.246234977065
FBgn0265959	467.512394555638	0.540248046465644	0.185683116860541	2.90951625328112	0.0036198856434166	0.0373135541030186	814.44433037338	728.776023561352	908.577622642404	1150.75492530934	1248.42029804328	1165.78486742991
FBgn0265194	803.113030782307	0.53164410611726	0.182728310577328	2.90947858291655	0.00362032190848494	0.0373135541030186	1064.12799369953	866.992165960919	1134.89804617848	1414.59644257604	1513.86111869519	1502.56716246522
FBgn0027611	3007.74855276491	0.521333355973768	0.179202978038092	2.90917797059686	0.00362380505001353	0.0373135541030186	4163.77232841982	3637.11429265434	4601.11618334509	5714.19839895672	5371.84345721145	6713.11865689108
FBgn0028622	206.86119405367	0.323915121869948	0.111362398401668	2.90865791792336	0.00362983800555284	0.037319449051212	303.187305467463	311.227957011612	288.943064999942	368.36334910696	375.738147954772	387.468593619217
FBgn0022224	140.821978858892	-0.631711467693685	0.217218381130322	-2.90818605868665	0.00363531978738152	0.037319449051212	91.5506765529202	168.179082360312	110.962926102639	87.2706557112907	78.7838052163232	74.3399045897335
FBgn0052479	937.638525170386	0.728645319968678	0.250574966377124	2.90789351587518	0.00363872215651082	0.037319449051212	954.742769766167	570.262405704507	951.424693117681	1272.52793327859	1416.89643535203	1412.45818720494
FBgn0036774	257.123039391747	-0.480178246815698	0.165147207764874	-2.90757714474558	0.00364240491583686	0.037319449051212	156.944016947863	218.439497778336	162.599139239511	135.979858898988	121.205854178959	129.531651936657
FBgn0040734	527.046076709323	-0.906924448619852	0.311936386256306	-2.90740192096304	0.00364444608932034	0.037319449051212	669.390011679143	1298.07188281551	1145.88447450547	642.352617037756	558.758987765	459.555773827443
FBgn0287218	110.421628625502	-0.537862053089591	0.18517387254506	-2.90463252562106	0.00367684507974935	0.0376097970863691	238.982934897882	281.265017050867	184.571995893499	170.48221115694	138.174673764013	176.838863948305
FBgn0031568	42.30762564423	0.769391406580919	0.265161700348135	2.90159327523837	0.00371270231724073	0.0379348419183563	84.4168576007445	49.2938689676777	73.6090697908598	116.699132637191	119.993795637169	114.888943456861
FBgn0039064	732.303549156459	1.0997374627871	0.379135111620696	2.90064789326958	0.00372392063152712	0.038007699266673	1338.78002335829	645.653028831543	1222.78947279443	2226.41649570432	2397.4517956598	2248.21893274406
FBgn0283657	1072.72494553786	0.930627389976698	0.320978376140296	2.89934605928074	0.00373941919358743	0.0381240347170789	1115.25369619012	678.515608143328	1072.27540471461	1788.03366701505	1904.14396915144	1769.51500167381
FBgn0010411	12315.465504458	-0.453754199014047	0.156552077980284	-2.8984233545031	0.00375043963623442	0.0381820676628911	11379.6301985454	14143.4742079221	10348.1168411957	8970.61158706756	8528.04390003154	8693.2633882358
FBgn0261555	362.305461601995	0.479738534569558	0.165530838256798	2.8981822337256	0.00375332435404199	0.0381820676628911	568.327576523322	382.752394337262	489.994703383933	662.648118365963	689.661310278275	654.416432827805
FBgn0036237	445.300468677881	-0.369914639788314	0.127676049176125	-2.89729077752107	0.0037640070664789	0.0382488936657058	367.391676037043	402.083323344194	388.919562775588	306.462070055928	307.862869614555	282.716909879138
FBgn0039590	557.16732658924	0.705722059300731	0.243777690909418	2.89494111076374	0.00379229669792432	0.0384619583340987	859.625183737159	626.322099824611	821.784838859151	1220.77440489166	1236.29971262538	1305.45377908335
FBgn0001233	17424.6192601706	0.259723576630122	0.089718798232936	2.89486241173008	0.00379324755779399	0.0384619583340987	7152.8424693814	7612.51984292999	8763.87387644312	8382.04204854955	10359.4643566756	9433.28334756088
FBgn0039633	625.888684645175	0.738381532801964	0.255463402152143	2.8903613064787	0.00384799285338763	0.0389745507089305	856.058274261071	519.035443836136	722.906983916205	1051.30696880113	1237.51177116717	1209.7129928693
FBgn0039291	147.918600271751	-0.54667648923235	0.189277680631466	-2.8882247891486	0.00387422892527209	0.0391975849262023	97.4955256797331	171.078721711352	118.653425931535	89.3002058441114	93.3285077177982	84.4771643065153
FBgn0041789	586.533522498457	0.338089551515104	0.117152718551049	2.88588737586813	0.0039031180167569	0.03943898141147	624.209158315365	560.59694120104	619.634557642462	754.992649409306	755.112471534913	769.305376284666
FBgn0032285	522.073172546498	1.47221725122875	0.510192908264392	2.88560900667365	0.00390657150784727	0.03943898141147	581.406244602311	467.808481967765	814.094339030256	1921.98397578122	1559.9193432832	1687.2905617488
FBgn0039688	341.103074269356	0.562326542166561	0.195073112253631	2.8826450537962	0.00394351524178616	0.0397654091715787	615.886369537826	480.373585822271	582.280701330682	776.302925803923	815.715398624392	885.32068193228
FBgn0035285	674.970337370951	0.332758684810059	0.115447803450206	2.88233015150938	0.00394745887990612	0.0397654091715787	974.955256797331	851.527422755373	911.873551140502	1168.00610143832	1110.24562427926	1168.03759181142
FBgn0069923	351.775544536372	-0.681470204607895	0.236461945266953	-2.88194450840092	0.00395229330999789	0.0397710207752818	331.722581276165	520.968536736829	388.919562775588	289.210893926952	254.532293775813	230.904249104475
FBgn0259213	293.189344710729	1.01489643607165	0.352355072734029	2.88032304515092	0.00397267889000698	0.0399329387235512	576.650365300861	248.402437739082	506.474345874424	856.470156050341	969.64683343167	862.79343811721
FBgn0022986	98.2628700713721	0.495363786886355	0.172097725427556	2.87838660072749	0.00399714959010067	0.0401355257977927	97.4955256797331	74.4240766766898	72.5104269581604	114.66958250437	126.054088346117	102.498959358572
FBgn0030412	770.703454693458	0.675279872548013	0.234801103423251	2.87596549889613	0.00402793735698175	0.0404010372656055	1261.49698470972	840.89541180156	1171.15325965756	1667.27543411222	1839.90486643659	1718.8287030899
FBgn0019662	247.012936908439	0.313236450446225	0.10894527642724	2.87517238671125	0.00403806962461102	0.0404590208724497	288.919667563112	277.39883124948	305.422707490433	354.156498177215	362.405503995087	366.0677119949
FBgn0004893	126.630719875266	0.554771573626086	0.193040690708951	2.87385820879868	0.0040549096187211	0.0405840146769309	190.235172058016	143.0488746513	152.711353745217	233.398265274382	263.01670356834	216.261540624679
FBgn0016032	76.3711774042622	-0.527240117247682	0.183520794470084	-2.87291758282808	0.00406700199863171	0.0406612737454599	126.030801488436	164.312896558926	137.330354087425	100.462731574625	94.5405662595878	102.498959358572
FBgn0030638	305.392650816213	-0.381440869751991	0.132790881430408	-2.87249294261137	0.00407247175020994	0.0406722259220752	378.092404465307	350.856361475824	358.157563460005	267.900617532334	288.469932945922	278.211461116124
FBgn0037098	914.558701688451	0.561948777487271	0.195733871915997	2.87098381075527	0.00409196481046228	0.0407713919406728	947.608950813992	703.64581585234	949.227407452282	1255.27675714961	1329.62822034318	1252.51475611793
FBgn0035922	81.4347340869288	0.681309869427885	0.237328693754845	2.87074377163876	0.00409507312648096	0.0407713919406728	134.353590265974	115.019027591248	83.4968552851544	184.689062086685	201.201717937072	147.553446988713
FBgn0035989	400.439836263899	0.40767409277534	0.142011763899487	2.87070649346968	0.00409555604136248	0.0407713919406728	565.949636872597	403.049869794541	528.447202528412	647.426492369808	723.598949448384	612.741031769924
FBgn0003278	276.650122877656	0.54709341477683	0.190605072618565	2.87029829406305	0.00410084738652751	0.0407804053475217	101.062435155821	74.4240766766898	97.7792121102466	105.536606906677	150.295259181909	143.047998225699
FBgn0003475	819.019328637408	0.492536865107704	0.171779534441377	2.86726161361085	0.00414040596033668	0.0411298019436009	1140.22206252273	879.557269815425	1073.37404754731	1362.84291418911	1519.92141140414	1467.64993455186
FBgn0017424	39.8838089107403	1.26268152257942	0.440570649263345	2.86601371355691	0.00415676238603613	0.041248214157272	71.338189521756	34.7956722124784	37.3538563117796	106.551381973087	110.297327302852	126.152565364396
FBgn0267912	582.512267611561	0.788301897167561	0.275222768470069	2.86423213293595	0.00418021545025449	0.0413942014195535	806.121541595842	447.511006510486	684.454484771726	1127.41509878191	1146.60738053295	1071.17044340661
FBgn0001122	746.197625757431	0.823249924771224	0.287425539445601	2.8642198127527	0.00418037805258773	0.0413942014195535	1209.18231239376	638.887203679117	1012.94869174885	1745.41311422581	1751.42459288595	1563.39072076591
FBgn0030237	894.87075814018	-0.612638033106501	0.214073148397026	-2.86181633564936	0.00421220921926208	0.0416338180924754	1523.07034628949	1964.02238710433	1537.00132294646	1099.00139692242	1082.3682778181	1104.96130912922
FBgn0039900	898.340259343882	0.63486498737904	0.221847594604651	2.86171679485828	0.00421353224618405	0.0416338180924754	1859.54880686711	1131.82589335589	1642.4710348856	2421.25330845511	2525.9300010895	2245.96620836255
FBgn0260934	2798.11928124337	0.453736255705841	0.158630289147752	2.86033807379132	0.00423189605493255	0.0417708805931665	3618.03517857839	2954.73249870962	3677.15756104489	4456.89209167429	4927.01797237467	4653.00221000286
FBgn0030723	91.1908740679197	0.669393634487153	0.234060879140975	2.85991250201182	0.00423757908184866	0.0417745353343937	165.266805725401	116.952120491941	146.11949674902	219.191414344637	221.806713147494	238.78878443975
FBgn0034070	378.981535806484	0.865159804162739	0.302541750353075	2.85963772984414	0.00424125202792726	0.0417745353343937	737.161291724812	419.481159450434	695.44091309872	1152.78447544217	1086.00445344347	1133.12036389806
FBgn0033907	137.479278158352	-0.541080542301199	0.189257338999594	-2.85896729374579	0.00425022603008922	0.0418186260611319	112.952133409447	126.617584995407	84.5954981178538	74.0785798479561	70.2993954237961	78.8453533527476
FBgn0287844	68.2018140600486	0.848068826291451	0.29675074459724	2.85784902559378	0.00426523273194991	0.0419219174859094	139.109469567424	78.2902624780763	112.061568935339	166.423110891299	181.808781268438	243.294233202764
FBgn0037000	97.0964807383287	0.516584542124001	0.180816087859687	2.85696117109264	0.00427718157925819	0.0419665563685199	77.2830386485689	71.52443732565	73.6090697908598	100.462731574625	121.205854178959	96.8671484048042
FBgn0085426	139.571226579612	0.555181230299359	0.194340545129968	2.85674422662586	0.00428010585370418	0.0419665563685199	269.89615035731	178.811093314125	236.208209030371	328.787121516956	344.224625868243	331.15048408154
FBgn0037351	10841.3305086863	-0.445872238981896	0.156090059189616	-2.85650630986216	0.00428331490575666	0.0419665563685199	9995.66932182337	12134.9906841018	8913.28930169023	7927.42281879771	7686.87527202956	7177.17987948154
FBgn0013765	966.321656574254	0.384476852428956	0.134877973196307	2.85055330620496	0.00436432341478691	0.0426408243670752	995.167743828496	852.49396920572	985.482620931362	1233.96648075499	1266.60117617012	1196.19664658026
FBgn0287720	2035.26956565077	-2.1962867853168	0.770489440291924	-2.85050861240184	0.00436493682592617	0.0426408243670752	2.3779396507252	1.93309290069324	31.8606421482826	1.01477506641036	3.63617562536876	3.37908657226061
FBgn0086906	5762.26789694881	0.83111614046381	0.291574783510008	2.85043902102488	0.00436589210555556	0.0426408243670752	7975.60958853232	4745.74307120191	7316.96126577801	10597.2960185234	11857.5687143275	13193.0803402962
FBgn0036851	98.368427438333	0.890280738600132	0.312372998872838	2.85005663681755	0.00437114446938834	0.0426473255785653	186.668262581928	98.5877379353554	159.303210741413	270.944942731565	295.742284196659	255.684217301053
FBgn0034484	66.5007802819202	-0.788974154741863	0.276965414446986	-2.84863782114168	0.00439068317107103	0.0427601341064471	112.952133409447	141.115781750607	114.258854600738	72.0490297151353	72.7235125073752	68.7080936359658
FBgn0036024	1512.36763763081	-1.50014637266284	0.526680505018039	-2.84830434840465	0.00439528694337673	0.0427601341064471	16.6455775550764	7.73237160277297	10.986428326994	3.04432519923107	2.42411708357917	6.75817314452123
FBgn0031116	146.678460489663	0.902479175257663	0.31685766918986	2.84821629081952	0.00439650335618019	0.0427601341064471	248.494693500783	152.714339154766	282.351208003746	382.570200036705	442.401367753199	451.671238492169
FBgn0031990	1326.12966991779	0.626703800852901	0.220089986348502	2.84748893509651	0.00440656260218484	0.0427813749077859	1766.80916048882	1192.71831972773	1707.29096201487	2202.06189411047	2548.9591133835	2453.2168514612
FBgn0003386	182.074243191227	0.818048600376665	0.287297388185332	2.84739309864158	0.00440788956352537	0.0427813749077859	340.045370053703	202.008208122444	298.830850494237	502.313657873127	472.702831297939	505.736623648338
FBgn0261596	7042.17963044476	-0.383048266540269	0.134545417425886	-2.84698114487079	0.00441359764275909	0.0427921072808905	6569.05828512836	7169.84156867124	5892.02151176688	5037.34342966101	5260.33407136681	4756.62753155219
FBgn0033984	427.720649667611	0.510909466173202	0.179516850316035	2.84602512395778	0.0044268702016042	0.04279736002869	282.974818436299	230.038055182496	297.732207661538	424.175977759529	369.677855245824	359.309538850378
FBgn0261802	1197.51076387993	0.279768554512027	0.098303318446349	2.8459726378893	0.00442759991867454	0.04279736002869	1631.26660039749	1382.16142399567	1741.34888982855	1868.20089726147	1936.86954977976	1964.37566067417
FBgn0001120	483.622817660626	-3.54673254994618	1.24623958045629	-2.84594760555399	0.00442794798317916	0.04279736002869	1.1889698253626	1.93309290069324	10.986428326994	0	1.21205854178959	0
FBgn0000527	572.709432991742	-0.507451657505904	0.178369708892186	-2.84494301559144	0.0044419368834564	0.0428676745260654	1279.33153209016	1360.89740208804	1097.5441898667	880.82475764419	836.320393834815	912.353374510365
FBgn0035086	187.05771541423	0.91567512197918	0.321905122654127	2.84454970591764	0.0044474246153728	0.0428676745260654	370.958585513131	207.807486824524	284.548493669145	545.948985728772	538.153992554577	542.906575943205
FBgn0024996	346.409257448232	-0.37746907060181	0.13270450418445	-2.84443299736951	0.00444905419634902	0.0428676745260654	319.832883022539	346.990175674437	302.126778992335	263.841517266693	236.35141564897	245.546957584271
FBgn0050158	156.393497794962	0.926677066468928	0.325867231067366	2.84372584329401	0.00445893964152596	0.0429184480195739	298.431426166012	153.680885605113	283.449850836445	434.323728423633	500.5801777591	461.80849820895
FBgn0000259	676.275911476362	0.331620131384448	0.116660113818838	2.84261793109017	0.00447446738686067	0.0430233689379839	472.021020668952	399.183683993155	428.470704752766	520.579609068513	546.638402347104	566.560181949029
FBgn0266227	77.0683298319902	1.03566299187559	0.36453164411532	2.84107843199467	0.00449612530632117	0.0431449700249312	177.156503979027	58.9593334711439	114.258854600738	242.531240872075	243.623766899707	229.777886913722
FBgn0037312	301.751858197796	-0.415627719213886	0.146293220046012	-2.84105934016055	0.00449639448850918	0.0431449700249312	292.486577039199	327.659246667505	258.181065684359	233.398265274382	218.170537522126	207.250643098651
FBgn0046225	121.462539567708	0.642039272432719	0.226136630745762	2.83916528832758	0.00452317205230608	0.0433571688065381	192.613111708741	116.952120491941	131.837139923928	193.822037684378	238.775532732549	254.557855110299
FBgn0031050	240.704744039393	-0.446882101620668	0.15743071208264	-2.8385954411874	0.00453125661198367	0.0433777308205663	215.20353839063	266.766820295667	235.109566197672	198.89591301643	167.264078766963	159.943431087002
FBgn0262537	94.826132371221	-0.723222558114409	0.254824107416928	-2.83812456146905	0.00453794697175609	0.0433777308205663	186.668262581928	276.432284799134	190.065210056996	131.920758633346	140.598790847592	123.899840982889
FBgn0001565	1153.53810152025	-0.32467760213254	0.114402516577282	-2.83802849663024	0.0045393129800399	0.0433777308205663	857.247244086434	1062.23454893094	908.577622642404	779.347251003154	756.324530076703	724.250888654525
FBgn0264794	135.938075496939	0.900477763705585	0.317404684545295	2.83700212237127	0.00455393092857048	0.04340243951376	274.65202965876	130.483770796794	218.629923707181	377.496324704653	413.311962750249	371.699522948667
FBgn0035247	206.312735424586	-0.448627086662752	0.158137932627257	-2.83693532101624	0.00455488381100161	0.04340243951376	165.266805725401	187.510011367245	158.204567908714	127.861658367705	111.509385844642	135.163462890425
FBgn0030679	1083.64582949024	-0.440655696303757	0.155331982117834	-2.8368639239373	0.00455590244842221	0.04340243951376	1571.81810912936	1511.67864834212	1292.00397125449	1088.85364625831	1089.64062906884	1045.26411301928
FBgn0002626	8283.51717903104	-0.499559038780499	0.176154822699648	-2.83590895284355	0.00456954707753784	0.043462476954555	7793.69720525184	9351.33690710356	6689.63620830665	5712.1688488239	5636.07221932158	5511.29019935706
FBgn0035725	94.7332015299271	-0.798834590357075	0.281712827864152	-2.83563441684058	0.00457347649252241	0.043462476954555	43.9918835384162	32.8625793117851	31.8606421482826	22.3250514610279	12.1205854178959	27.0326925780849
FBgn0034606	270.107739151118	0.475102861425478	0.167577289780635	2.83512677670947	0.00458075037326841	0.043462476954555	477.965869795765	355.689093727557	459.232704068349	563.200161857748	620.573973396269	611.614669579171
FBgn0050154	38.192728551965	-1.11327674200143	0.392674114320596	-2.83511619788746	0.00458090206662335	0.043462476954555	32.1021852847902	61.8589728221838	45.0443561406754	19.2807262617968	20.604995210423	24.7799681965778
FBgn0083986	77.6413404448291	-0.736014659632681	0.259684693441056	-2.83426277413515	0.00459315460123595	0.0435343032439265	78.4720084739316	99.554284385702	88.9900694486514	59.8717289182111	50.9064587551627	49.5599363931557
FBgn0000108	1186.77922797388	1.0583718588193	0.373477659619157	2.8338290967619	0.00459939223807147	0.0435490315983589	2385.07346967737	1014.87377286395	1852.31181593119	3635.93906294831	3831.31705059689	3469.1955475209
FBgn0005593	12311.6847822542	-0.408926531825869	0.144366080625379	-2.83256655617747	0.00461759522065412	0.0436277997123087	10909.9871175272	13407.9323592083	9573.57364414257	8642.83924061701	8582.58653441207	8302.41570804433
FBgn0011837	1046.43993103732	0.691926726291488	0.244306294466864	2.83220998378876	0.00462274798997172	0.0436277997123087	1341.15796300901	734.575302263432	1187.63290214805	1761.64951528838	1690.82166579647	1816.82221368546
FBgn0052163	79.7745742253361	-0.547334575361137	0.193257342647581	-2.83215410013808	0.00462355602727975	0.0436277997123087	96.3065558543705	134.34995659818	102.173783441044	79.1524551800078	76.359688132744	73.2135423989799
FBgn0014135	84.6429314289125	0.50218678587267	0.177328850753351	2.83195195671329	0.00462647994367998	0.0436277997123087	112.952133409447	104.387016637435	114.258854600738	143.08328436386	181.808781268438	145.300722607206
FBgn0033793	93.811390869238	-0.454173449702573	0.160421923375257	-2.83111834185017	0.00463855551726912	0.0436600589356641	211.636628914543	224.238776480416	190.065210056996	172.511761289761	140.598790847592	143.047998225699
FBgn0031414	916.427915338737	0.65966591609022	0.233009599147581	2.83106755474228	0.00463929213039752	0.0436600589356641	1834.58044053449	1206.24997003258	1799.57695996162	2338.04175300946	2491.99236191939	2814.77911469309
FBgn0013272	4785.48014076556	0.320014459594783	0.113071034092741	2.83020724239867	0.00465178615297417	0.0437301899018757	5856.86535973616	5420.39249354385	6513.85335507475	7172.4301693884	7377.80034387322	7658.1365349333
FBgn0029629	1322.41177251957	-0.42851934303887	0.151425227446188	-2.82990721074633	0.00465615057032232	0.0437301899018757	1041.53756701764	1421.78982845988	1148.08176017087	907.208909370859	913.892140509349	863.919800307963
FBgn0010808	594.404306521707	-0.344271785436088	0.121712137968648	-2.82857397119069	0.00467558944715064	0.0438372434973677	638.476796219716	760.672056422791	571.294273003688	528.697809599796	507.852529009837	517.000245555874
FBgn0013749	1046.0991488955	-0.576693038475957	0.203888047029571	-2.82847889750161	0.0046769784415346	0.0438372434973677	826.334028627007	1184.98594812496	869.026480665226	670.766318897246	650.875436941009	610.488307388417
FBgn0029979	1257.83908457964	0.771438530119592	0.272826864842731	2.82757539498275	0.00469019696334259	0.0438494362001791	1045.10447649372	610.857356619065	872.322409163324	1425.75896830655	1597.49315807868	1290.81107060355
FBgn0037679	169.424770169517	0.381749520119252	0.135010802978733	2.82754795688005	0.00469059891992053	0.0438494362001791	117.708012710897	106.320109538128	139.527639752824	158.304910360016	151.507317723698	162.196155468509
FBgn0004047	264690.476546021	0.477213876710359	0.168780492689133	2.8274231761446	0.00469242729825535	0.0438494362001791	395242.105226337	318056.607683311	357025.961342324	473477.80958601	464334.779125424	552133.735009858
FBgn0051760	160.08954376389	0.82383644219961	0.291408088258406	2.82708845565423	0.00469733505411459	0.0438512262381099	298.431426166012	173.978361062392	295.534921996139	458.678330017481	431.492840877093	467.440309162718
FBgn0021967	837.168704367964	-0.437360004723948	0.154747763502119	-2.8262767411043	0.00470925592025917	0.0438539873024942	957.120709416892	1152.12336881317	809.699767699458	771.229050471871	675.1166077768	709.608180174729
FBgn0033052	749.281432221942	0.384083803669892	0.135906968693147	2.82607880495873	0.00471216696704848	0.0438539873024942	996.356713653858	833.163040198787	1061.28897638762	1195.4050282314	1252.05647366864	1323.47557413541
FBgn0052551	14.9788858710279	-1.31464180534783	0.465197780715383	-2.82598468833228	0.0047135517115589	NA	23.779396507252	30.9294864110919	28.5647136501844	9.13297559769321	14.544702501475	10.1372597167818
FBgn0036271	195.257179333359	-0.467680875255731	0.165501051563219	-2.82584836071016	0.00471555816263141	0.0438539873024942	187.857232407291	205.87439392383	169.190996235708	141.05373423104	133.326439596855	132.910738508917
FBgn0030613	703.314854000907	0.573831690945955	0.203069862561201	2.82578460293691	0.00471649680603294	0.0438539873024942	1417.25203183222	965.579903896275	1292.00397125449	1744.3983391594	1894.44750081713	1829.21219778374
FBgn0033457	210.522950467458	-0.471669685502122	0.167008287492394	-2.82422921990385	0.0047394476438956	0.0440233608321092	122.463892012348	142.082328200953	135.133068422026	111.625257305139	79.9958637581128	95.7407862140507
FBgn0040370	162.777830304271	0.729027976348625	0.258221921527257	2.82326137160152	0.00475377994107229	0.0441124210499902	328.155671800077	155.613978505806	291.140350665341	449.545354419788	426.644606709935	405.490388671273
FBgn0285917	991.171703065895	0.890522218905522	0.315490693190764	2.82265765084569	0.00476273994189162	0.0441515014752825	1382.7719068967	813.832111191855	1264.53790043701	1962.57497843763	2182.91743376305	2269.61981436838
FBgn0053554	2735.8485120231	0.771275206632369	0.273329615880389	2.8217769382513	0.00477583827514794	0.0442288289664597	2479.00208588102	1398.59271365156	2119.28202427714	3336.58041835725	3523.45418098233	3373.45476130684
FBgn0033936	412.162320236475	0.603833180664427	0.214134805596553	2.81987404608149	0.00480425027741135	0.0444476806759908	570.705516174048	774.203706727644	838.264481349642	1029.99669240651	910.25596488398	1378.66732148233
FBgn0037963	810.908996630454	0.667952586585641	0.236904709027897	2.81949898474574	0.00480986831399255	0.0444554230452314	637.287826394353	447.511006510486	675.665342110131	886.913408042652	950.253896763037	958.53422433126
FBgn0003870	637.678052491274	0.477067286592183	0.169243609972825	2.81882008229902	0.0048200527022859	0.0445053128360023	508.879085255192	486.17286452435	546.025487851602	691.061820225453	728.447183615542	725.377250845278
FBgn0039151	882.339416195858	0.525543483489251	0.186538690759316	2.81734304743964	0.00484227751398665	0.0446395971816716	1540.90489366993	1178.22012297253	1406.26282585523	2029.55013282071	1872.63044706491	2034.21011650089
FBgn0034443	455.79488316513	-0.570739884292778	0.202608876138833	-2.8169540010759	0.00484814686642576	0.0446395971816716	485.09968874794	660.151225586742	587.773915494179	373.437224439011	402.403435874143	391.974042382231
FBgn0032509	510.007063418894	-0.411743129240809	0.146182819811488	-2.81663146033014	0.00485301776048471	0.0446395971816716	428.029137130536	505.503793531283	449.344918574055	344.008747513111	339.376391701084	357.056814468871
FBgn0266580	1163.64992627469	0.526124027327102	0.18679536382022	2.81657968681421	0.00485380003771456	0.0446395971816716	504.123205953742	380.819301436569	503.178417376325	649.456042502629	662.996022358904	684.828211978151
FBgn0053926	4003.16964318548	-0.713387778760915	0.253750615875378	-2.811373585439	0.00493304713337229	0.0452938809659543	5248.11280915051	7671.47917640113	5333.91095275559	3645.072038546	4017.97406603248	3470.32190971165
FBgn0029897	8084.3046596461	-0.430708573395457	0.153208004216933	-2.81126678463614	0.00493468503102944	0.0452938809659543	7817.47660175909	8801.37197685633	6641.29592366788	5995.29109235239	5644.55662911411	5617.16824528789
FBgn0028899	24.6581639726291	1.03143665746094	0.367118281572717	2.80954860935367	0.00496110266943857	0.0454330964672978	28.5352758087024	17.3978361062392	41.7484276425772	58.8569538518007	64.2391027148481	55.1917473469233
FBgn0032474	694.631255896712	-0.351757090458463	0.125204672759938	-2.80945656982712	0.00496252141683987	0.0454330964672978	708.626015916109	788.701903482843	706.427341425714	564.214936924159	578.151924433633	585.70833919184
FBgn0024944	221.12874419695	0.729144571526882	0.259544167273365	2.80932751903806	0.00496451129390994	0.0454330964672978	319.832883022539	201.041661672097	286.745779334543	421.131652560298	450.885777545727	465.187584781211
FBgn0004514	103.316392328513	0.938762256663387	0.334437259593036	2.8069906379622	0.00500066950111519	0.0457190019875802	203.313840137004	94.7215521339689	151.612710912517	294.284769259004	290.894050029501	274.832374543863
FBgn0015400	242.642069941513	1.08749577137408	0.387605729173399	2.80567517330884	0.00502112807765421	0.0458609517348024	456.564412939238	212.640219076257	415.286990760373	782.391576202385	781.777759454284	738.893597134321
FBgn0027932	1123.86868900962	0.428597932397365	0.152807429048378	2.80482392162801	0.00503440734768512	0.0459371143461985	749.050989978438	583.794056009359	815.192981862955	968.095413355481	941.769486970509	978.808743764824
FBgn0284251	563.012715398586	0.393992217640406	0.14057829912099	2.80265318405448	0.0050684140401515	0.0462020722993418	221.148387517443	187.510011367245	204.347566882088	272.974492864386	253.320235234024	277.08509892537
FBgn0013733	9150.90452614188	0.48960083463702	0.174733732713963	2.80198234784174	0.00507896525872734	0.0462529079095463	14014.387331549	10457.0660463001	15275.5299458525	16874.6945793378	18769.9385781535	20160.7568522976
FBgn0085419	76.6633118823512	0.646312565992638	0.230727812344472	2.80119054320034	0.00509144467035854	0.0463211864432424	142.676379043512	119.851759842981	135.133068422026	188.748162352326	198.777600853492	234.283335676736
FBgn0000036	298.285208089262	1.17823899574468	0.420800579025065	2.7999937606419	0.00511035943639261	0.0464478221305752	634.909886743628	199.108568771404	436.161204581662	955.918112558556	1092.06474615242	824.497123631589
FBgn0266410	2155.29465565914	0.656137078409271	0.234458355156684	2.79852291026604	0.00513369273928435	0.0466025247773775	2129.44495722442	1414.05745685711	1945.69645671064	2935.74426712516	3072.5684034366	2640.19297512629
FBgn0003896	100.242293782381	0.57768800011023	0.206443574105644	2.79828520995576	0.0051374725982615	0.0466025247773775	200.935900486279	140.14923530026	179.078781730002	246.590341137717	269.076996277288	259.063303873314
FBgn0029514	158.178930157888	-0.515643165319037	0.18431348271233	-2.79764213518678	0.00514771124449833	0.0466025247773775	117.708012710897	138.216142399567	119.752068764235	92.3445310433425	92.1164491760086	78.8453533527476
FBgn0053087	2448.07082917766	0.715551995451981	0.255796104766595	2.79735297808736	0.00515232103549249	0.0466025247773775	3791.62477308133	2318.74493438154	3908.97119874447	4874.97941903536	5602.13458015147	5974.22505975676
FBgn0016917	4437.81328299693	0.463552154267293	0.165719732777814	2.79720553791136	0.00515467298729333	0.0466025247773775	6421.6260267834	4665.51971582314	6353.45150150063	8093.84592968901	7328.10594365985	8624.55529459984
FBgn0053988	249.659144074513	1.16199852502379	0.415439937239089	2.79703134163303	0.00515745300020665	0.0466025247773775	489.855568049391	204.907847473484	381.229062946692	773.258600604692	839.956569460184	792.95898229049
FBgn0014455	2286.66173231707	-0.440600613907198	0.157554856151113	-2.7964902172524	0.00516609749313946	0.0466353150400104	1967.7450609751	2195.99353518752	2167.62230891592	1366.90201445475	1716.27489517406	1583.66524019947
FBgn0263019	137.677315408964	0.547190431933702	0.195702874901782	2.79602653874309	0.00517351519802273	0.0466569779934193	190.235172058016	118.885213392634	126.343925760431	199.91068808284	212.110244813178	221.893351578447
FBgn0011742	868.64269345402	0.376162454266489	0.134555954828774	2.79558385019203	0.00518060609494701	0.0466756545259857	426.840167305173	340.224350522011	403.20191960068	520.579609068513	507.852529009837	487.714828596282
FBgn0030403	434.149112791573	-0.374668270643801	0.134086101658616	-2.79423643471795	0.00520224280438743	0.0467838577822495	520.768783508819	600.225345665252	529.545845361111	425.19075282594	424.220489626356	424.638545914084
FBgn0037855	154.067244214107	0.572438162367773	0.204865883569828	2.79420932559842	0.00520267895750118	0.0467838577822495	101.062435155821	100.520830836049	126.343925760431	189.762937418737	151.507317723698	145.300722607206
FBgn0037130	212.370418080099	0.555599017280472	0.19913295311981	2.79009078395071	0.0052693264148832	0.0473373884111923	435.162956082711	268.699913196361	371.341277452397	530.727359732617	533.305758387418	513.621158983613
FBgn0033108	204.312630793806	0.888959407093782	0.318681374293669	2.78949282512694	0.00527906661328355	0.0473791132918055	380.470344116032	194.275836519671	387.820919942888	561.170611724927	636.330734439533	583.455614810332
FBgn0017430	190.220740130173	-0.461580652196754	0.165515179618715	-2.78875117835151	0.00529116994929888	0.0474419461799238	131.975650615249	172.045268161699	129.639854258529	114.66958250437	103.024976052115	97.9935105955578
FBgn0265296	391.71769530976	0.828226983335589	0.29716886792246	2.7870583790483	0.00531888960513362	0.0476445429176613	808.499481246567	443.644820709099	655.889771121542	1067.5433698637	1169.63649282695	1148.88943456861
FBgn0010038	197.308038881288	-0.909293739062544	0.326296199726867	-2.78671262436917	0.00532456745595704	0.0476494977916156	107.007284282634	232.937694533536	187.867924391597	80.1672302464182	115.145561470011	86.7298886880224
FBgn0259245	61.2743733125287	1.16836687361781	0.419434290502241	2.78557786064364	0.00534324059527105	0.0477706260142598	124.841831663073	45.4276831662912	85.6941409505532	203.969788348482	191.505249602755	177.965226139059
FBgn0013812	213.766422711305	0.998694996176299	0.358667280222217	2.78446083946532	0.00536167951009567	0.0478365248513409	379.281374290669	212.640219076257	398.807348269882	592.628638783649	659.359846733536	726.503613036032
FBgn0250785	539.803898263346	-0.279410091930848	0.100360962150961	-2.7840515469607	0.00536845016277882	0.0478365248513409	818.011239849468	812.865564741508	747.077126235592	648.441267436218	672.692490693221	638.647362157256
FBgn0029853	122.102320559823	-0.442540585043157	0.158966341868745	-2.78386342568386	0.00537156471645201	0.0478365248513409	124.841831663073	156.580524956153	115.357497433437	102.492281707446	98.1767418849566	92.3616996417901
FBgn0034793	229.675654942702	-0.453423065585932	0.16288578732421	-2.78368710391799	0.00537448539752925	0.0478365248513409	190.235172058016	237.770426785269	168.092353403008	140.038959164629	153.931434807278	143.047998225699
FBgn0261705	24.4577543711237	0.731481369056217	0.262845736695214	2.78293031590775	0.00538703750146648	0.0478365248513409	36.8580645862406	34.7956722124784	42.8470704752766	51.7535283869282	64.2391027148481	74.3399045897335
FBgn0028550	307.893432602386	0.424084654106327	0.152400746893063	2.78269406647921	0.00539096135794133	0.0478365248513409	443.48574486025	335.391618270278	451.542204239454	516.520508802872	581.788100059002	550.79111127848
FBgn0039713	14148.1761474537	-0.429732880356966	0.154431286142801	-2.78268018800022	0.00539119194522649	0.0478365248513409	13858.6322844265	16516.3457435231	11725.8149534007	10706.8917256957	10309.7699564622	10239.7586761404
FBgn0000038	156.93778675552	0.888375239994477	0.319255641278295	2.78264539488617	0.00539177006283128	0.0478365248513409	323.399792498627	156.580524956153	260.378351349758	457.663554951071	473.914889839729	437.028530012373
FBgn0260753	310.171372446576	0.489059276800464	0.17578249272403	2.78218421653779	0.00539943822882545	0.0478588909929639	520.768783508819	416.581520099394	524.052631197614	651.485592635449	675.1166077768	723.124526463771
FBgn0085370	1239.19759558825	0.56847638439544	0.204471926545568	2.78021728459017	0.00543225373478452	0.0481039002152633	1659.80187620619	1208.18306293328	1641.3723920529	2157.41179118842	2265.33741460474	2262.86164122386
FBgn0030878	396.157458471005	-0.382113846196857	0.137534332999622	-2.77831606016446	0.00546414402030252	0.0483361683578718	328.155671800077	411.748787847661	377.933134448594	280.077918329259	293.31816711308	286.095996451399
FBgn0038422	36.2990110659176	0.663394125610073	0.238813671000575	2.77787332203639	0.00547159452748376	0.0483361683578718	72.5271593471186	64.7586121732236	50.5375703041724	101.477506641036	86.0561564670607	109.257132503093
FBgn0039335	201.956483559215	-0.356127506418492	0.128208300696049	-2.77772581404682	0.00547407886436213	0.0483361683578718	179.534443629753	205.87439392383	203.248924049389	130.905983566936	174.536430017701	157.690706705495
FBgn0031214	27.2748711035929	0.827466940965376	0.297942682358659	2.77726888411806	0.00548178096417055	0.0483582537047986	40.4249740623284	25.1302077090122	48.3402846387736	67.9899294494939	59.3908685476898	73.2135423989799
FBgn0031637	1198.6357420842	-0.221490946521791	0.0798215818512877	-2.77482532148313	0.0055231364014565	0.0486768931381446	1594.40853581125	1710.78721711352	1591.93346458143	1410.5373423104	1401.13967430876	1389.93094338987
FBgn0004797	773.252169303293	0.376862251337857	0.135853497582201	2.77403422101686	0.00553658538480361	0.0487492148749091	1045.10447649372	896.955105921665	1004.15954908725	1265.42450781372	1250.84441512685	1307.70650346486
FBgn0003274	10136.0131835428	-0.514479456666665	0.185556271640101	-2.77263307846868	0.00556047783976079	0.0488958653878285	8900.62811266442	10537.2894016789	7671.82290073991	6545.2991783468	6299.06824168049	6134.16849084377
FBgn0263594	6846.97449929698	-0.196897549424619	0.0710204994520709	-2.77240445989116	0.00556438508863555	0.0488958653878285	4441.99126755467	5146.85984809576	4826.33796404847	4192.03579934119	4190.0863789666	4197.95188493843
FBgn0039152	71.4282545888135	0.864812652024889	0.311966438426558	2.77213361920174	0.00556901714838787	0.0488958653878285	146.2432885196	81.1899018291162	108.765640437241	208.028888614123	214.534361896757	188.102485855841
FBgn0031632	254.73379717433	0.834189142936405	0.300990502916802	2.77147994655163	0.00558021093700474	0.0489479257474246	315.077003721089	169.145628810659	375.735848783195	525.653484400565	492.095767966573	513.621158983613
FBgn0030897	137.776476013046	1.15298875189545	0.416149427017373	2.77061237392337	0.00559509899887998	0.0489764740542859	269.89615035731	140.14923530026	192.262495722395	467.811305615175	472.702831297939	397.605853335999
FBgn0283438	477.013469272773	0.315274489822576	0.113796762099926	2.77050492478627	0.00559694538194999	0.0489764740542859	444.674714685612	384.685487237955	406.497848098778	500.284107740306	518.761055885943	517.000245555874
FBgn0030574	534.127941784459	0.47870377269902	0.17279971537602	2.77028102539022	0.00560079458785775	0.0489764740542859	970.199377495881	704.612362302687	816.291624695654	1142.63672477806	1221.7550101239	1104.96130912922
FBgn0034286	131.117342274647	0.957801701257232	0.345785496458049	2.76993023440309	0.00560683007547199	0.0489764740542859	255.628512452959	122.751399194021	230.714994866874	394.747500833629	404.827552957722	381.836782665449
FBgn0039259	169.049799891714	-0.516262256497303	0.186392577556549	-2.76975759048493	0.00560980263151371	0.0489764740542859	156.944016947863	173.978361062392	138.428996920124	102.492281707446	112.721444386432	113.762581266107
FBgn0264542	530.832136665584	0.879963608499351	0.317811652179154	2.7688211003771	0.00562595176042134	0.0490291356859773	1026.08095928792	539.332919293415	948.128764619583	1464.32042083015	1598.70521662047	1561.1379963844
FBgn0267322	23.0708551926831	1.09149987231385	0.394214586486492	2.76879625901731	0.00562638070304773	0.0490291356859773	49.9367326652292	16.4312896558926	32.959284980982	76.1081299807768	71.5114539655857	61.9499204914446
FBgn0050438	121.714794109364	0.38979902969802	0.140814274685564	2.76817837231654	0.00563705942173703	0.049046392912641	199.746930660917	176.878000413432	195.558424220493	253.693766602589	236.35141564897	257.93694168256
FBgn0038118	201.164312190603	0.768110003258896	0.277489235947405	2.76807134747555	0.00563891095113069	0.049046392912641	66.5823102203056	34.7956722124784	49.438927471473	96.4036313089839	64.2391027148481	93.4880618325436
FBgn0037933	386.681154611339	-0.369854237027109	0.133635906915068	-2.76762619841514	0.00564661791624808	0.049067526528294	353.124038132692	389.518219489688	392.215491273686	288.196118860541	272.713171902657	317.634137792498
FBgn0039054	1011.90239130078	0.738270830991656	0.266815255505488	2.76697383585876	0.00565792958186224	0.0491199152681187	1968.93403080046	1155.02300816421	1842.42403043689	2619.13444640513	2860.45815862343	2803.51549278555
FBgn0028833	755.855473722327	-0.321636673421952	0.116284425858547	-2.76594798527193	0.00567575870662029	0.049187450470205	970.199377495881	1017.77341221499	918.465408136699	735.711923147509	810.867164457234	780.568998192201
FBgn0051140	362.196451847009	0.985796124077561	0.356408358539554	2.76591752257729	0.0056762889174586	0.049187450470205	751.428929629163	328.625793117851	617.437271977063	1064.49904466446	1162.36414157621	1133.12036389806
FBgn0250908	251.870768638286	1.14859641911463	0.415333984346588	2.76547661015899	0.00568396811325373	0.0492081336285225	468.454111192864	189.443104267938	386.722277110189	731.652822881867	798.746579039338	783.948084764462
FBgn0029507	643.319530574685	-0.672286862107823	0.243255006376754	-2.76371233678366	0.00571478961042968	0.0494289430676978	655.122373774792	878.590723365079	722.906983916205	435.338503490043	534.517816929208	447.165789729154
FBgn0038197	1263.63856381592	0.444278117785485	0.160777994127804	2.76330178265766	0.00572198349164455	0.0494451696146013	1645.53423830184	1305.80425441829	1784.19596030383	2102.61393760226	2235.03595106	2104.04457232761
FBgn0026718	544.416411909611	-0.365148140524531	0.132161658668206	-2.7628901165749	0.00572920505617077	0.0494584214564554	520.768783508819	718.14401260754	585.57662982878	476.944281212868	423.008431084566	518.126607746627
FBgn0038467	1326.47105661079	-0.355385764523185	0.12864139282585	-2.76260818323301	0.00573415555281339	0.0494584214564554	2089.01998316209	1767.81345768397	1712.78417617837	1280.64613380987	1519.92141140414	1553.25346104913
FBgn0261403	2269.17981260905	0.349895458276276	0.126691436759196	2.76179248753274	0.00574850017130455	0.0495361951740405	2436.19917216797	2084.84069339766	2444.48030275617	2939.8033673908	3008.32930072176	2927.41533376844
FBgn0030433	232.738963620103	-0.441444979261954	0.159910776183427	-2.76057054938932	0.00577004941864722	0.0495931445794069	156.944016947863	191.376197168631	153.809996577916	126.846883301295	115.145561470011	128.405289745903
FBgn0025839	372.270543064427	-0.443623753936884	0.160707782573713	-2.76043727834651	0.00577240409359929	0.0495931445794069	428.029137130536	493.905236127123	369.143991786999	317.624595786442	329.679923366768	302.991429312702
FBgn0085442	539.929729425148	0.297573607281726	0.107807976675965	2.76021883033881	0.00577626557623377	0.0495931445794069	631.34297726754	523.868176087869	536.137702357307	669.751543830836	739.355710491648	667.932779116848
FBgn0026401	3334.28056435965	0.635664085142061	0.230298357595847	2.76017637198088	0.00577701637849037	0.0495931445794069	2907.03122301156	2025.88135992652	2536.76630070292	3916.01698127757	3922.22144123111	3765.42880368908
FBgn0085399	234.532690324103	1.04719877914921	0.37943260058907	2.75990723391567	0.00578177766445226	0.0495931445794069	443.48574486025	222.305683579723	380.130420113993	657.574243033911	780.565700912494	721.998164273018
FBgn0264090	240.558672692852	0.955770525627482	0.346412309038322	2.75905474687318	0.00579688226227562	0.0496768767508191	200.935900486279	125.651038545061	207.643495380187	326.757571384135	366.041679620455	342.414105989075
FBgn0004456	463.557616106802	0.51033858506718	0.185062699184709	2.75765233791288	0.00582180794681261	0.0498445398613846	485.09968874794	381.785847886915	497.685203212828	703.239121022377	593.908685476898	644.279173111023
FBgn0025740	547.446129923187	0.64737322353687	0.234817327294258	2.75692271518628	0.00583481405528318	0.0498777891626756	590.918003205212	433.979356205633	543.828202186203	809.790502995465	818.139515707972	827.87621020385
FBgn0031374	1888.93404163504	0.501059695981954	0.181751940502769	2.75683271714131	0.005836420155839	0.0498777891626756	2772.67763274558	2006.55043091959	2678.49122612114	3395.43737220905	3394.97597555263	3762.04971711682
FBgn0283472	767.716722728278	0.401213257601197	0.145572107560719	2.75611354622895	0.00584926876751331	0.0499416905420925	871.514881990785	759.705509972444	918.465408136699	1089.86842132472	1213.27060033138	1063.28590807134
FBgn0004882	778.163286191851	1.0205818498692	0.370945516969602	2.7512985146895	0.00593595234341979	0.0506353072377222	326.966701974715	116.952120491941	224.123137870678	487.092031876971	459.370187338254	406.616750862027
FBgn0038020	293.753260283054	-0.677220436463485	0.246236751391083	-2.75028172130121	0.00595440475389464	0.0507461552719636	342.423309704429	627.288646274957	475.71234655884	306.462070055928	289.681991487711	308.623240266469
FBgn0034394	1131.16394831611	0.6074147538282	0.22092320559162	2.74943844039189	0.00596974751445307	0.0508303227009017	1693.09303131634	1406.32508525433	1446.91261066511	2005.19553122687	2273.82182439727	2646.95114827081
FBgn0037238	444.549456515039	0.533227421817202	0.194130222973708	2.7467511943744	0.00601887753276763	0.0512017596520342	922.640584481377	605.058077916985	842.65905268044	1128.42987384832	1122.36620969716	1177.04848933745
FBgn0029708	92.8710374334428	0.893446590772494	0.325349219619824	2.74611567169732	0.00603054971273987	0.0512541601728111	200.935900486279	82.1564482794628	146.11949674902	277.033593130027	269.076996277288	248.926044156532
FBgn0000541	2179.03272980214	0.657093175071978	0.239421265939867	2.74450630979879	0.00606019894340614	0.0514591139504934	1468.37773432281	1081.56547793787	1510.63389496168	2043.75698375046	2252.00477064505	2106.29729670912
FBgn0002590	9540.5515889798	-0.411729330074516	0.150110844882501	-2.74283533875782	0.00609112208457863	0.0516288865557909	11788.6358184702	13475.5906107326	9929.53392193718	9330.85673564323	8605.61564670607	8519.80361085976
FBgn0284247	122.575524739072	0.518759359410834	0.189133173811184	2.74282585628644	0.00609129797286542	0.0516288865557909	193.802081534104	207.807486824524	181.276067395401	272.974492864386	261.804645026551	300.738704931194
FBgn0030066	153.938143669132	-0.454250357847266	0.1656691286508	-2.74191312253922	0.00610824949920759	0.0517010188961768	166.455775550764	190.409650718284	131.837139923928	117.713907703601	104.237034593905	135.163462890425
FBgn0037345	98.7983337044146	-1.112725709615	0.405842246734487	-2.74176904589969	0.00611092920702283	0.0517010188961768	67.7712800456682	193.309290069324	101.075140608345	61.9012790510318	66.6632197984273	39.4226766763738
FBgn0011481	561.413403323576	0.655091078449606	0.239237237397254	2.73824880096665	0.00617673273191415	0.052194213671331	536.225391238532	346.990175674437	509.770274372522	750.933549143664	751.476295909544	689.333660741165
FBgn0002932	316.977454540809	0.421572231710931	0.153968002753984	2.73805092077823	0.00618045055411222	0.052194213671331	266.329240881222	253.235169990815	286.745779334543	348.067847778752	378.162265038351	353.677727896611
FBgn0260965	266.285424165713	0.399604016682602	0.14596797075329	2.73761438636424	0.00618865939797046	0.052216111689954	254.439542627596	238.736973235615	250.490565855463	300.373419657466	343.012567326453	337.908657226061
FBgn0005677	120.34868985927	0.706501696698018	0.258106536129952	2.73724837538522	0.00619554964357818	0.0522268545657207	250.872633151508	138.216142399567	221.925852205279	322.698471118494	350.284918577191	322.139586555512
FBgn0015571	268.794563919678	-0.422775981772785	0.154510172411017	-2.73623396554206	0.00621468227054032	0.0523406845575036	174.778564328302	231.004601632842	227.419066368776	148.157159695912	141.810849389382	183.597037092827
FBgn0259221	1135.33661244806	0.350757024878934	0.128213040981211	2.73573594538121	0.00622409480671107	0.0523725190161082	1684.7702425388	1334.80064792868	1671.03574853579	1944.30902724224	1958.68660353197	2075.88551755877
FBgn0013325	9745.07129858607	-0.439496569966231	0.160738241646991	-2.73423776111376	0.00625248778511146	0.0525638620487942	9012.3912762485	10950.9712824272	7614.69347343954	7164.31196885712	6794.80018527243	6377.46272404653
FBgn0032600	471.692195244182	0.470815442781616	0.172246444629108	2.73338264714494	0.00626874577519534	0.0526529342527247	676.523830631319	380.819301436569	470.219132395343	649.456042502629	747.840120284175	716.36635331925
FBgn0003651	542.283601126367	0.415775665785509	0.152162734490979	2.73244081197922	0.00628669659708506	0.0527560514076686	901.23912762485	788.701903482843	992.074477927559	1057.39561919959	1334.47645451034	1186.05938686348
FBgn0051869	192.23373396621	0.455693086109363	0.166869272700722	2.73083881013039	0.00631733611440192	0.0529653662684482	194.991051359466	161.413257207886	213.136709543684	233.398265274382	283.621698778763	263.568752636328
FBgn0010403	690.918694062567	-0.501206273427286	0.183639453006697	-2.72929517715895	0.00634698635923032	0.0530848606826391	1587.27471685907	1957.25656195191	1579.84839342174	1244.1142314191	1215.69471741496	1161.2794186669
FBgn0034253	66.0667118146575	0.68544395148143	0.251145059803881	2.72927507320547	0.00634737334261767	0.0530848606826391	47.558793014504	55.0931476697574	49.438927471473	82.1967803792389	70.2993954237961	92.3616996417901
FBgn0029134	1490.67174625595	-0.408477264339809	0.149668939501624	-2.72920530939806	0.00634871639912827	0.0530848606826391	929.774403433553	1131.82589335589	942.635550456086	782.391576202385	759.960705702071	721.998164273018
FBgn0051548	472.582389942872	-0.371370557344865	0.136095181319574	-2.72875610836526	0.00635737031022701	0.0531094601477904	588.540063554487	716.210919706846	546.025487851602	502.313657873127	463.006362963622	466.313946971965
FBgn0034430	200.398845382445	-0.475566390353325	0.1743210540271	-2.72810644134467	0.00636990500154249	0.0531664063773268	95.1175860290079	132.416863697487	114.258854600738	94.3740811761632	75.1476295909544	76.5926289712405
FBgn0285954	146.521285517412	0.857168547995122	0.314268525851415	2.72750363935709	0.00638155536455947	0.0532083450482677	114.14110323481	126.617584995407	156.007282243315	259.782417001051	247.259942525076	211.756091861665
FBgn0031187	584.726910556035	0.517496937607315	0.189754882110653	2.72718641992855	0.00638769396611793	0.0532083450482677	879.837670768324	542.232558644455	716.315126920009	1035.07056773856	1087.21651198526	936.00698051619
FBgn0035825	222.999074006193	-0.544221014428092	0.199570659832613	-2.72695903738831	0.00639209737781405	0.0532083450482677	156.944016947863	247.435891288735	171.388281901106	119.743457836422	143.022907931171	134.037100699671
FBgn0010287	69.0600670615998	-0.760259306376382	0.278828462865402	-2.72662015406719	0.00639866514412194	0.0532153743381447	39.2360042369658	46.3942296166378	38.452499144479	24.3546015938486	31.5135220865293	18.0217950520566
FBgn0015834	2158.66862817802	-0.355234418445635	0.130339565155	-2.72545345707722	0.00642132290936071	0.0533135563718068	1479.07846275107	1785.21129379021	1386.48725486664	1158.87312584063	1222.96706866569	1255.89384269019
FBgn0283651	94.505646818897	0.614324298233721	0.225405217837564	2.72542181643917	0.0064219383885162	0.0533135563718068	211.636628914543	135.316503048527	146.11949674902	265.871067399514	258.168469401182	228.651524722968
FBgn0039528	632.556576091955	0.513903115313462	0.188598895930718	2.72484689148044	0.00643313117646808	0.0533410344234411	690.79146853567	563.49658055208	680.059913440929	930.548735898297	888.438911131768	941.638791469957
FBgn0013675	22112.3212897048	-0.644880894622046	0.236682841075334	-2.72466264006349	0.0064367219426867	0.0533410344234411	26151.3913088504	46723.821956206	32384.6947794802	22912.6062244795	22255.8189443404	22151.0388433591
FBgn0035574	270.520823194447	0.673874507405444	0.247530894087495	2.72238546178097	0.00648124961145797	0.053600217507451	425.651197479811	307.361771210226	379.031777281293	520.579609068513	556.334870681421	696.091833885686
FBgn0030262	960.704710429466	-1.02708880133449	0.377298440017518	-2.72221852093214	0.00648452482850172	0.053600217507451	1287.6543208677	2519.78659605364	1523.81760895407	965.05108815625	1021.76535072862	629.636464631227
FBgn0027525	1027.10165089154	-0.350200155705862	0.128646977425391	-2.72217943020823	0.00648529196557134	0.053600217507451	1237.71758820247	1515.5448341435	1326.06189906818	1029.99669240651	1090.85268761063	1081.3077031234
FBgn0039877	493.006870360597	0.291465502207246	0.10709286228033	2.72161464360058	0.00649638475134812	0.0536062346838656	322.210822673264	277.39883124948	337.283349638716	365.319023907729	380.58638212193	398.732215526752
FBgn0030367	158.421662212892	-0.506947015186778	0.18627106701906	-2.72155532955048	0.00649755070861653	0.0536062346838656	311.510094245001	353.756000826863	313.113207319329	265.871067399514	201.201717937072	220.766989387693
FBgn0266557	4388.74215188179	0.754731157428855	0.277404864561396	2.72068465209562	0.00651468759844524	0.0536571034592731	4636.98231891414	3265.96045572123	4470.37768625386	6428.60004570961	7348.71093887027	7099.46088831955
FBgn0287873	1407.25525921172	0.431232942388554	0.158523152338452	2.72031520965379	0.00652197133287609	0.0536571034592731	1256.74110540827	1090.26439599099	1344.73882722407	1570.87180280323	1739.30400746806	1667.01604231524
FBgn0004852	507.428663839598	0.590547818834458	0.217090686110649	2.72028169155752	0.00652263252045265	0.0536571034592731	777.58626578714	601.191892115598	873.421051996023	1051.30696880113	1124.79032678074	1214.21844163231
FBgn0032160	516.959200003494	-0.35785486088826	0.131571022726771	-2.71986075255647	0.00653094121830915	0.0536571034592731	468.454111192864	572.1954986052	449.344918574055	405.910026564143	358.769328369718	398.732215526752
FBgn0004915	332.953321824545	-0.308986184037035	0.113607123167258	-2.71977826233774	0.0065325705652718	0.0536571034592731	253.250572802234	286.0977493026	244.997351691966	200.925463149251	220.594654605705	214.008816243172
FBgn0033669	592.536726437689	-0.40428004505332	0.148669535270087	-2.71932002961378	0.00654162823706535	0.0536840770946457	576.650365300861	729.742570011699	573.491558669087	455.63400481825	442.401367753199	523.758418700395
FBgn0035620	232.002432412297	-3.42581811808126	1.26011271121633	-2.7186600750773	0.00655469309806158	0.053733695077017	0	6.76582515242635	5.493214163497	0	0	1.12636219075354
FBgn0004183	171.10577233213	-1.04936176462683	0.386017429024668	-2.7184310492876	0.00655923251370341	0.053733695077017	147.432258344962	292.863574455026	97.7792121102466	105.536606906677	84.8440979252711	69.8344558267193
FBgn0035714	243.890020974716	-0.515196383884936	0.189546407731149	-2.71804878843014	0.00656681542958388	0.0537484593875624	161.699896249313	235.837333884576	209.840781045585	130.905983566936	175.74848855949	120.520754410629
FBgn0262124	3130.20926618215	0.414911528484614	0.152688227175292	2.71737733917284	0.00658015406930894	0.0538102660830558	3560.96462696098	2956.66559161031	3431.06156652023	4401.07946302172	4493.101014414	4368.03257574222
FBgn0053179	186.37161189993	0.900045821596467	0.331320878986319	2.71653819206979	0.00659685835153086	0.0538556065741364	342.423309704429	221.339137129376	324.099635646323	571.318362389031	569.667514641106	514.747521174367
FBgn0028408	458.77091641118	1.04944097614984	0.38631859021114	2.71651689238221	0.00659728284447638	0.0538556065741364	167.644745376127	86.0226340808493	145.020853916321	252.678991536179	306.650811072766	264.695114827081
FBgn0032435	152.874553020914	-2.1988135659165	0.809664245661383	-2.71571034252645	0.00661337509692566	0.0539396154835218	2.3779396507252	9.66546450346621	7.6904998288958	3.04432519923107	0	1.12636219075354
FBgn0261641	257.316634880351	0.743694456244413	0.273952004096067	2.71468886930873	0.00663380614421292	0.0540173910202111	323.399792498627	211.67367262591	328.494206977121	447.515804286967	483.611358174045	513.621158983613
FBgn0003396	888.352832213326	0.467398086834121	0.172176014270949	2.71465272798444	0.00663453006507648	0.0540173910202111	1196.10364431477	950.115160690729	1179.94240231916	1404.44869191193	1676.276963295	1517.20987094501
FBgn0033830	1284.76012913551	-1.03519017700139	0.381407928620046	-2.71412862534547	0.00664503597436769	0.054055594479152	1954.66639289611	2992.42781027314	2208.27209372579	1157.85835077422	1469.01495264898	865.046162498717
FBgn0029895	422.48531689581	0.574320690561218	0.211785795813445	2.7117998558653	0.00669189847924271	0.0543892238286702	652.744434124067	457.176471013952	646.001985627247	877.780432444959	881.16655988103	853.782540591181
FBgn0002565	15117.9628262035	0.641390415873696	0.236596791158685	2.71090073847839	0.00671007102981427	0.054489292956518	26566.3417779019	18859.2543391633	26820.0688318578	30124.6126214579	28377.9266389196	54187.0322727712
FBgn0031770	42.0252340386938	1.02360103213872	0.377715373166977	2.70997980187112	0.00672873055680198	0.0545271175703626	101.062435155821	41.5614973649047	49.438927471473	127.861658367705	135.750556680434	125.026203173643
FBgn0039927	1090.02040442005	0.459381163352627	0.169526991040509	2.70978184968113	0.00673274744350105	0.0545271175703626	1942.77669464249	1628.63076883406	1844.62131610229	2530.84901562743	2602.28968922224	2312.42157761701
FBgn0031926	20.1273930848384	0.792286217056696	0.292394935239304	2.70964412023165	0.00673554354932421	0.0545271175703626	41.613943887691	29.9629399607453	23.0714994866874	57.8421787853904	50.9064587551627	54.0653851561698
FBgn0015380	104.622455463778	0.872253602614121	0.321922532381933	2.70951398201375	0.00673818650122033	0.0545271175703626	193.802081534104	85.0560876305027	176.881496064603	251.664216469769	279.985523153395	300.738704931194
FBgn0051708	59.6486253006641	0.733497459406124	0.270812499523431	2.70850666308576	0.00675867549811275	0.0546453606795238	127.219771313798	77.3237160277297	99.9764977756454	175.556086488992	178.172605643069	150.932533560974
FBgn0039994	1247.37388359265	0.493548837220901	0.182286657716045	2.70754230399968	0.00677834313155739	0.054756763194805	1029.64786876401	774.203706727644	988.77854942946	1315.14848606782	1362.3538009715	1252.51475611793
FBgn0052767	525.36390713083	0.843183342351795	0.311513171014204	2.70673416345966	0.00679486435940707	0.0548425770952838	588.540063554487	332.491978919238	489.994703383933	830.086004323672	861.773623212397	838.013469920632
FBgn0036814	431.898860232998	0.546149059649311	0.201822689457252	2.70608354847531	0.00680819149672697	0.0548728300501049	501.745266303017	388.551673039342	558.110559011295	726.578947549816	738.143651949859	648.784621874038
FBgn0003462	2915.9510130919	-0.413146860195099	0.152679477453422	-2.70597507331093	0.00681041577520123	0.0548728300501049	3631.11384665738	3981.20482897773	3165.19000100697	2802.80873342541	2637.43938693414	2653.70932141533
FBgn0036927	1756.81173641038	-0.241283655534829	0.0892219381823174	-2.70430860896326	0.00684466872518979	0.0551010647678049	1477.88949292571	1673.09190555	1543.59317994266	1364.87246432193	1258.11676637759	1349.38190452274
FBgn0004666	132.466730504191	0.729803936895715	0.269954564194449	2.70343247973402	0.00686273893094167	0.0551987427161727	26.1573361579772	29.9629399607453	34.0579278136814	54.7978535861593	50.9064587551627	43.928125439388
FBgn0033437	148.617664487211	-0.504393659631465	0.18663243223896	-2.7026045450967	0.00687985449963276	0.0552885800670574	159.321956598588	259.034448692895	208.742138212886	143.08328436386	140.598790847592	159.943431087002
FBgn0030316	173.042596431648	-0.430704000302112	0.159403171476148	-2.70197886474648	0.00689281437583975	0.0553448947034179	190.235172058016	219.406044228683	191.163852889696	135.979858898988	143.022907931171	167.827966422277
FBgn0031461	389.67570658515	0.441444950474182	0.163447847133623	2.7008306209949	0.00691665531134513	0.0554210654070077	615.886369537826	517.102350935442	649.297914125346	874.736107245728	820.563632791551	723.124526463771
FBgn0026268	628.873090088801	-0.396821914869669	0.146929147298555	-2.70077055618747	0.00691790447074092	0.0554210654070077	1633.64454004821	1757.18144673016	1405.16418302253	1223.81873009089	1192.66560512095	1226.6084257306
FBgn0000273	1126.51885794934	0.600174935125975	0.222232603568885	2.70066104382358	0.00692018250565024	0.0554210654070077	1727.57315625186	1165.65501911803	1591.93346458143	2322.82012701331	2397.4517956598	2077.01187974952
FBgn0037999	192.320818727041	-0.749233253459778	0.277575825694467	-2.69920210661455	0.00695059511976513	0.0556167241166749	142.676379043512	263.867180944628	162.599139239511	120.758232902832	130.902322513275	87.8562508787759
FBgn0085432	2944.92642687983	0.62152253853171	0.230412204354885	2.69743757832562	0.00698753837714985	0.0558392397673249	5948.41603628908	2949.89976645789	5483.32637800271	7652.4187758005	7540.21618847302	6930.50655970652
FBgn0031267	296.275921034952	-0.511110761339243	0.189497309431681	-2.69719270881528	0.00699267902765552	0.0558392397673249	116.519042885535	130.483770796794	126.343925760431	78.1376801135975	100.600858968536	84.4771643065153
FBgn0028978	541.182716941207	-0.438719908567989	0.162668717998839	-2.69701460714235	0.00699642012571881	0.0558392397673249	703.870136614659	809.965925390469	780.036411216574	518.550058935693	540.578109638156	634.141913394242
FBgn0040754	207.508369699753	-0.476518417675114	0.176726793881746	-2.69635637703001	0.00701026211984361	0.0559017300088387	229.471176294982	339.257804071664	274.66070817485	195.851587817199	202.413776478861	209.503367480158
FBgn0025628	808.456876340349	-0.328509747801366	0.121927541315622	-2.69430306111878	0.00705359968799863	0.0561991173084929	750.2399598038	926.91804588241	854.744123840134	650.470817569039	715.114539655857	653.290070637052
FBgn0025390	589.75456103688	0.688762600401752	0.255666862693562	2.69398463745101	0.00706034188555109	0.0562046736745326	617.075339363189	635.02101787773	620.733200475161	940.696486562401	941.769486970509	1136.49945047032
FBgn0038659	489.786788550852	0.677744327892718	0.251666446179225	2.69302617882584	0.00708067090897461	0.0563182875206552	901.23912762485	501.637607729896	773.444554220378	1079.72067066062	1250.84441512685	1148.88943456861
FBgn0284408	2142.23620947239	0.441488497055921	0.163965484179033	2.69256971530582	0.00709037101770027	0.0563472390791258	3113.91197262465	2425.06504391967	3117.9483592009	3709.00286772986	4062.8202320787	3982.81670650451
FBgn0000100	12172.2984252034	-0.351545294566247	0.130583023712928	-2.69212095547029	0.00709991904773827	0.0563691003328415	12034.7525723202	13595.4423705756	10638.1585490283	9751.98838820353	9639.50158285259	9034.55113203412
FBgn0030099	82.9422305303721	-0.504848174517466	0.187545471382447	-2.691870780969	0.00710524689073889	0.0563691003328415	111.763163584084	127.584131445754	101.075140608345	73.0638047815457	77.5717466745336	90.108975260283
FBgn0051030	464.313212265413	-0.278460477282032	0.103489632270249	-2.69070892584553	0.00713003742040687	0.0565050786290631	1095.04120915895	1020.67305156603	938.240979125288	896.046383640345	775.717466745336	843.6452808744
FBgn0031598	281.836830411503	0.300092564218985	0.111537914834666	2.69049824594457	0.00713454100995054	0.0565050786290631	219.959417692081	218.439497778336	239.504137528469	271.959717797976	281.197581695184	281.590547688384
FBgn0037552	145.737731981974	0.37149825545306	0.138093091505374	2.69020159809083	0.00714088661894307	0.0565072032195171	167.644745376127	176.878000413432	179.078781730002	219.191414344637	232.715240023601	226.398800341461
FBgn0001114	1849.83640034623	0.578623605088446	0.215211731316757	2.68862483261568	0.00717470039961759	0.056726500268405	3066.35317961014	2411.53339361482	3444.24528051262	4193.0505744076	4285.83900376798	4844.48378243097
FBgn0034066	583.712407907764	-0.412907446703071	0.153663868783106	-2.68708220073441	0.00720792120180155	0.0568360747770417	600.429761808113	776.136799628337	594.365772490376	504.343208005947	506.640470468048	470.819395734979
FBgn0000181	4470.20364335093	-0.297997443876237	0.110907088207818	-2.68691071681415	0.00721162264639095	0.0568360747770417	3420.6661875682	3761.79878474905	3202.54385731875	2839.34063581618	2911.36461737859	2697.63744685472
FBgn0264785	635.002781116172	0.302379044794637	0.112541624010001	2.68681963188808	0.00721358938912885	0.0568360747770417	462.509262066051	385.652033688302	517.460774201418	557.111511459286	556.334870681421	567.686544139783
FBgn0039341	547.604586559721	-0.371740224678674	0.138358247512955	-2.68679483414147	0.00721412491551327	0.0568360747770417	359.068887259505	394.350951741421	346.072492300311	310.521170321569	258.168469401182	280.464185497631
FBgn0025525	310.040013520116	0.587278786925269	0.218598514716923	2.68656348230807	0.00721912285563414	0.0568360747770417	513.634964556643	347.956722124784	443.851704410558	700.194795823146	632.694558814165	626.257378058967
FBgn0030685	878.00842442657	0.367764215796176	0.137002981221489	2.6843519207923	0.00726705673236427	0.0571650537204086	806.121541595842	715.2443732565	872.322409163324	1094.94229665678	990.251828642093	1001.33598757989
FBgn0001134	42.8268903704928	0.807638923139322	0.301075194188215	2.68251565964094	0.0073070730721628	0.0574312471893235	91.5506765529202	57.9927870207973	64.8199271292646	127.861658367705	135.750556680434	110.383494693847
FBgn0037895	151.894058221967	-0.464917177243668	0.173371950923026	-2.68161703648408	0.00732672809015505	0.0575181658040443	274.65202965876	370.187290482756	303.225421825035	237.457365540024	239.987591274338	210.629729670912
FBgn0039689	188.348407885046	-0.350952107677526	0.130881727432574	-2.68144464901202	0.00733050403073699	0.0575181658040443	178.34547380439	221.339137129376	172.486924733806	147.142384629502	152.719376265488	150.932533560974
FBgn0038156	168.99302077239	0.942644339177391	0.351605819868767	2.68096910207352	0.00734092936824507	0.0575514007301372	325.777732149352	165.279443009272	280.153922338347	455.63400481825	513.912821718785	511.368434602106
FBgn0011284	14226.4807306427	-0.385916456856066	0.143986859994585	-2.68021996500639	0.00735737956161779	0.0575981253342208	12482.9941964819	14370.6126237536	10618.3829780397	9939.72177548945	9508.59926033931	9229.41179103449
FBgn0065046	1915.010186816	-0.973011152746902	0.363045767870416	-2.68013357779784	0.00735927865100606	0.0575981253342208	1237.71758820247	1832.57206985719	1049.20390522793	858.499706183162	669.056315067852	571.065630712043
FBgn0033928	119.875315871207	-0.956111302877486	0.356817158587592	-2.67955528445468	0.00737200286637599	0.0576491864184726	110.574193758722	194.275836519671	132.935782756627	76.1081299807768	82.4199808416919	67.5817314452123
FBgn0028370	184.757770308677	0.899484154801631	0.335793318368082	2.67868389750286	0.00739121331040885	0.0577508414791441	388.79313289357	202.97475457279	296.633564828838	529.712584666206	535.729875470998	590.213787954854
FBgn0002645	1364.16873468316	0.370374558509148	0.138311405811071	2.67783091594823	0.0074100614721597	0.0578494975383215	1198.4815839655	964.613357445928	1204.11254463854	1471.42384629502	1482.34759660867	1396.68911653439
FBgn0034335	714.282097763732	-0.563697031061039	0.21055278781747	-2.67722425765131	0.00742349290169026	0.0578638838730292	668.201041853781	1083.49857083856	974.496192604368	650.470817569039	635.118675897744	559.802008804508
FBgn0263459	213.855363946312	-0.839951533756286	0.313744236267311	-2.67718554370715	0.00742435077011442	0.0578638838730292	282.974818436299	537.399826392721	239.504137528469	230.353940075151	183.020839810228	179.091588329812
FBgn0030759	145.378852017993	-0.540918612055635	0.202074275164918	-2.67683064365406	0.00743221920146267	0.0578766952556114	97.4955256797331	164.312896558926	102.173783441044	81.1820053128286	93.3285077177982	77.7189911619941
FBgn0034328	141.617335464195	-1.17848255512645	0.440449725435632	-2.67563466854442	0.00745879007199017	0.0580078686000211	159.321956598588	327.659246667505	332.888778307918	139.024184098219	132.114381055065	91.2353374510365
FBgn0036194	532.278010743518	-0.262336125387999	0.0980508471859231	-2.6755110528577	0.00746154128260112	0.0580078686000211	420.89531817836	452.343738762219	414.188347927674	379.525874837474	349.072860035401	344.666830370582
FBgn0037534	453.382052137327	0.409835528348954	0.153222767853153	2.67476912270463	0.00747807293134431	0.0580878213163237	684.846619408857	611.823903069411	609.746772148167	821.967803792389	882.37861842282	827.87621020385
FBgn0038095	198.970287270934	-1.14616165791286	0.428600883911831	-2.67419340681676	0.00749092362773029	0.0581247781769515	204.502809962367	440.745181358059	327.395564144421	163.378785692067	198.777600853492	77.7189911619941
FBgn0034720	457.090163705047	0.511679630408368	0.191353921137445	2.67399605593052	0.00749533330115776	0.0581247781769515	959.498649067618	676.582515242635	737.189340741298	1109.14914758652	1106.60944865389	1165.78486742991
FBgn0052000	2810.56446265118	0.571976872399154	0.213965591589897	2.67321894211593	0.00751272002803196	0.0582110590172009	3662.02706211681	2496.58948124532	3476.1059226609	4875.99419410177	4780.35888881813	4664.2658319104
FBgn0004117	695.631912699737	-0.380372720594536	0.14234554738567	-2.67217856533269	0.00753605347511689	0.0583150022102721	1033.2147782401	1110.56187144827	966.805692775472	877.780432444959	744.203944658807	767.052651903159
FBgn0261602	11649.8016722804	-0.488376408108307	0.182771381172963	-2.67206170339184	0.007538678496101	0.0583150022102721	11788.6358184702	13474.6240642822	10297.5792708915	8802.15892604344	8324.41806501089	8222.44399250082
FBgn0032956	970.617149436986	0.336160798848826	0.125838413321856	2.6713687019323	0.00755426195170707	0.0583869722584974	674.145890980594	630.188285625997	720.709698250807	898.075933773166	860.561564670607	796.338068862751
FBgn0032638	200.716851732592	-2.78422905469816	1.04255542098067	-2.67058134144966	0.00757200229295304	0.0584754795015592	34.4801249355154	290.930481554333	518.559417034117	65.9603793166732	33.9376391701084	22.5272438150708
FBgn0001404	541.008337371036	0.420421834813863	0.15746727761837	2.66989968438253	0.00758739114362513	0.0584946147534538	605.185641109563	547.065290896188	575.688844334486	781.376801135975	791.474227788601	738.893597134321
FBgn0028341	1031.34088109193	0.505842720283348	0.189462862982461	2.66987795033043	0.00758788226486913	0.0584946147534538	958.309679242255	713.311280355807	1017.34326307964	1270.49838314577	1295.69058117307	1250.26203173643
FBgn0264502	259.991395548885	0.970392346327275	0.363527625905286	2.66937717294724	0.00759920615550916	0.0584946147534538	538.603330889257	234.870787434229	391.116848440987	723.534622350585	780.565700912494	776.063549429187
FBgn0015756	10349.9262917111	-0.407936199875934	0.152821850895444	-2.66935780116308	0.00759964450657907	0.0584946147534538	8654.51135881436	10697.7361124364	7808.05461199464	6979.62290677044	6763.2866631859	6728.88772756163
FBgn0025633	822.361252581508	0.596462484727811	0.223635171074234	2.66712289423304	0.0076503691323726	0.058835541669076	388.79313289357	296.729760256413	448.246275741355	525.653484400565	613.301622145531	574.444717284304
FBgn0261090	136.605882043879	1.07323058696067	0.402433867505572	2.6668495711182	0.00765659339853538	0.058835541669076	250.872633151508	108.253202438822	207.643495380187	399.821376165681	421.796372542776	369.44679856716
FBgn0027578	793.186705053804	0.429088794837741	0.160924270995461	2.66640198015776	0.00766679599216438	0.0588652924319937	1281.70947174088	1173.3873907208	1250.25554361192	1608.41848026042	1585.37257266078	1794.29496987039
FBgn0261260	3816.65519760276	0.600324731953508	0.225169596525177	2.66610031379784	0.00767367918568907	0.0588695289344364	6360.98856568991	3945.44261031491	5818.41244197602	7782.30998430103	8246.84631833635	8415.05192711968
FBgn0035121	2312.26771164274	0.436004529913052	0.16359155819744	2.66520188888251	0.00769421158497886	0.0589783836085189	1570.62913930399	1217.84852743674	1522.71896612137	1891.54072378891	1995.04835978566	1944.10114124061
FBgn0038013	159.700013825394	-0.435449693527205	0.163429676919821	-2.66444688464285	0.00771150434037905	0.0590622465871865	128.408741139161	147.881606903033	127.44256859313	107.566157039498	83.6320393834815	107.004408121586
FBgn0034138	9856.85296552457	-0.400802317943964	0.150482464970145	-2.6634486484753	0.00773442159120539	0.0591890139547553	9327.46827996959	10986.73350109	8363.96788534053	7403.79888452997	7193.5674455212	7125.36721870688
FBgn0037340	134.888776287259	-0.565373279572956	0.212450347589463	-2.66120195136361	0.00778622409028177	0.0594879304930258	129.597710964523	138.216142399567	106.568354771842	70.0194795823146	81.2079222999024	102.498959358572
FBgn0038641	69.120602260288	0.995874723990032	0.374220225312143	2.66119962692919	0.00778627784577462	0.0594879304930258	145.054318694237	75.3906231270365	104.371069106443	240.501690739255	193.929366686334	211.756091861665
FBgn0052066	458.642849037413	0.261118712478802	0.0981361097351115	2.66078116590939	0.00779596070749378	0.059496843211372	406.627680274009	363.42146533033	470.219132395343	502.313657873127	496.944002133731	484.335742024021
FBgn0266377	330.413168812298	0.323359715108291	0.121548138812759	2.66034279312509	0.00780611588146744	0.059496843211372	512.44599473128	419.481159450434	481.205560722337	579.436562920314	593.908685476898	592.466512336361
FBgn0044511	186.661530509483	-0.55725521074055	0.209487608278313	-2.66008674842577	0.0078120527949736	0.059496843211372	123.65286183771	173.011814612045	126.343925760431	97.4184063753943	83.6320393834815	107.004408121586
FBgn0051646	53.8930089670972	0.794269136351332	0.298592459091051	2.66004419123368	0.00781303996139871	0.059496843211372	109.385223933359	71.52443732565	75.8063554562586	144.098059430271	147.87114209833	152.058895751728
FBgn0004880	378.268030886806	1.53084976804619	0.575573269048617	2.65969573357112	0.00782112707036053	0.0595096886253782	715.759834868285	213.606765526603	455.936775570251	1277.60180861064	1438.71348910424	1285.17925964979
FBgn0035481	131.808605833528	1.07247790681728	0.403306192930498	2.65921507186502	0.00783229471689004	0.0595459331787764	284.163788261661	135.316503048527	193.361138555094	428.235078025171	459.370187338254	399.858577717506
FBgn0038740	450.401542706043	0.493854350925884	0.185749749118103	2.65870803740296	0.00784409058619931	0.0595868907438572	293.675546864562	230.038055182496	293.33763633074	386.629300302346	415.736079833829	346.91955475209
FBgn0010300	1118.80401165727	0.762313304663688	0.286766444671279	2.65830720026372	0.00785342709616007	0.0596091144000786	781.153175263228	369.220744032409	717.413769752709	1012.74551627754	1095.70092177779	1057.65409711757
FBgn0031977	576.062064813332	-0.511995609483002	0.19267071146249	-2.65736087024664	0.00787550902021163	0.0596516383483539	342.423309704429	411.748787847661	320.803707148225	239.486915672844	263.01670356834	252.305130728792
FBgn0285950	13514.9955310434	-0.406505955407416	0.152973707264783	-2.65735833089141	0.00787556834896725	0.0596516383483539	12499.639774037	14915.7448217491	11236.9188928495	10045.2583823961	9719.4974466107	9397.23975745676
FBgn0002622	10362.2132063237	-0.39265460846696	0.147767701224123	-2.65724245023892	0.00787827617678841	0.0596516383483539	9914.81937369872	11246.7344962333	8312.33167220366	7704.17230418743	7569.30559347597	7178.30624167229
FBgn0036534	1340.03415141336	0.530872442551338	0.200057454022794	2.6535999128073	0.00796381898927363	0.0602404042334949	1224.63892012348	1000.37557610875	1274.4256859313	1628.71398158862	1768.39341247101	1658.00514478921
FBgn0029881	862.354535342518	0.507939618905608	0.191431110901954	2.65338072015766	0.00796899303153352	0.0602404042334949	1344.7248724851	1061.26800248059	1398.57232602634	1815.43259380813	1769.6054710128	1823.58038682998
FBgn0038834	8899.35647419865	-0.437997809644164	0.165110969740504	-2.65274809016349	0.00798394314819069	0.0603043894328814	8611.70844510131	10401.00635218	7948.68089458016	6855.82034866837	6499.05790107577	6547.54341485031
FBgn0039182	770.402541779678	0.48216755102296	0.181842425768691	2.65156796597231	0.00801189861724527	0.0603682948797517	278.218939134848	243.569705487349	305.422707490433	333.860996849007	403.615494415933	417.880372769562
FBgn0017561	501.191592517377	0.784132790135826	0.295729935700371	2.65151645293799	0.00801312088197426	0.0603682948797517	410.194589750097	273.532645448094	362.552134790802	606.835489713393	585.424275684371	608.23558300691
FBgn0086674	189.499403672886	0.700588362049273	0.264228906044503	2.6514448117621	0.00801482101052742	0.0603682948797517	265.14027105586	175.911453963085	264.772922680555	366.333798974139	347.860801493612	431.396719058605
FBgn0033677	446.505632014016	-0.375077867449846	0.141469677934388	-2.65129512505006	0.00801837429301929	0.0603682948797517	452.99750346315	529.667454789948	462.528632566448	414.028227095426	362.405503995087	337.908657226061
FBgn0050069	735.162044028169	0.46009602173991	0.173602963283363	2.65027746668655	0.00804256901378644	0.0605014617234517	1146.16691164955	956.880985843155	1189.83018781345	1380.09409031809	1688.3975487129	1460.89176140734
FBgn0040384	589.313381231608	0.275122468520679	0.103841901945526	2.64943595375404	0.00806262524550967	0.0606001278320571	517.201874032731	442.678274258753	507.572988707123	571.318362389031	574.515748808264	627.38374024972
FBgn0033699	9072.9343205372	-0.410995156585674	0.155140482254726	-2.64918060465262	0.00806871996731412	0.0606001278320571	8086.18378229104	9551.41202232531	6663.26878032186	6158.66987804446	6077.26152853299	6041.80679120198
FBgn0262467	264.853691687975	-0.434462542845274	0.164020828514074	-2.64882543748397	0.00807720402429043	0.0606148854058535	168.833715201489	249.368984189428	190.065210056996	164.393560758478	134.538498138644	152.058895751728
FBgn0267252	5850.40529479765	0.308693999039254	0.116604202732599	2.64736597656915	0.00811215079805079	0.0608280468711905	10598.4770232822	10174.8344827989	9992.15656340105	12622.7870510784	13222.3466323826	12260.4524463523
FBgn0039509	241.333682920105	-0.34431008441735	0.130072145367986	-2.64707008132499	0.00811925248610348	0.0608322398193313	287.730697737749	328.625793117851	282.351208003746	254.708541669	207.262010646019	245.546957584271
FBgn0037408	24.7566591232207	0.657744843616487	0.248544614714291	2.64638541604526	0.0081357062614122	0.0609064386623274	39.2360042369658	33.8291257621317	43.945713307976	57.8421787853904	70.2993954237961	56.3181095376769
FBgn0265101	420.490640900985	-0.531046959329758	0.200690028106959	-2.64610536128248	0.00814244509265538	0.0609078475233385	235.416025421795	406.916055595928	314.211850152028	238.472140606434	224.230830231074	200.49246995413
FBgn0033476	1790.16360102825	0.30643999194076	0.115847632848658	2.64519856302192	0.00816429926158214	0.0610222303329508	1794.15546647216	1544.5412276539	1996.23402701481	2094.49573707098	2151.40391167652	2349.59152991188
FBgn0032171	86.2293580679384	-0.598017125834397	0.22617065018006	-2.64409694785023	0.00819091920786446	0.0611587218004653	61.8264309188552	70.5578908753034	58.2280701330682	51.7535283869282	39.9979318790564	33.7908657226061
FBgn0261801	73.7756243873239	0.639156014492862	0.241780885352129	2.64353409725503	0.00820455015439625	0.0611587218004653	89.1727369021949	43.494590265598	56.0307844676694	94.3740811761632	112.721444386432	84.4771643065153
FBgn0261053	122.457325341146	0.441164516333802	0.166894592554783	2.64337214034655	0.00820847613737786	0.0611587218004653	181.912383280478	163.346350108579	198.854352718591	225.280064743099	247.259942525076	265.821477017835
FBgn0025638	760.536519495433	-0.342383455978956	0.129529960573837	-2.64327615373421	0.00821080373367628	0.0611587218004653	665.823102203056	787.735357032496	626.226414638658	565.229711990569	551.486636514262	524.884780891148
FBgn0004449	1984.63923262396	0.556408143646949	0.210514687753703	2.64308466826758	0.00821544886306529	0.0611587218004653	3478.92570901097	2538.15097861023	3137.72393018949	4289.45420571658	4624.00333692728	4548.25052626278
FBgn0032264	519.906745827443	-0.491212446772493	0.185923239785752	-2.64201746558709	0.00824138058611754	0.0613026853517767	860.814153562522	837.029226000174	777.839125551175	538.8455602639	686.025134652906	537.274764989437
FBgn0040650	44.5534209663494	-0.756345904390087	0.286407962388015	-2.64079915266258	0.00827107361858392	0.0614580883097714	47.558793014504	74.4240766766898	36.2552134790802	32.4728021251314	30.3014635447397	31.538141341099
FBgn0262517	1047.3706872571	0.313716642649028	0.118820863040061	2.6402488134029	0.00828451798539801	0.0614580883097714	999.923623129946	847.661236953987	1014.04733458155	1121.32644838344	1225.39118574927	1208.58663067855
FBgn0283468	1312.86592010825	0.285936958283213	0.108311782078971	2.63994325266235	0.00829199103917446	0.0614580883097714	902.428097450213	750.040045468978	900.887122813508	1012.74551627754	1021.76535072862	1075.67589216963
FBgn0002566	929.499658895793	0.342977092302584	0.129918383479848	2.63994273262939	0.00829200376268268	0.0614580883097714	948.797920639354	928.851138783103	894.295265817312	1195.4050282314	1158.72796595085	1161.2794186669
FBgn0011230	6048.21366136126	0.484820701496815	0.183658557325947	2.6397936941015	0.00829565096873695	0.0614580883097714	6728.38024172695	5662.99565258085	8310.13438653826	8927.99103427832	9841.91535933145	10199.2096372733
FBgn0030346	234.007726921419	-0.333852774424251	0.126490585805292	-2.63934878867708	0.00830654703965014	0.0614580883097714	222.337357342806	204.907847473484	205.446209714788	180.629961821044	187.869073977386	132.910738508917
FBgn0037324	148.086964658848	0.690449682027173	0.261606564689331	2.63926741611821	0.00830854129978304	0.0614580883097714	338.856400228341	242.603159037002	244.997351691966	411.998676962605	453.309894629306	467.440309162718
FBgn0287825	1202.5861467122	0.263654523935405	0.0999297285910016	2.6383992797029	0.00832984406695403	0.0615616607327655	1187.78085553724	992.64320450598	1152.47633150167	1348.63606325936	1335.68851305213	1313.33831441862
FBgn0261928	279.815297298728	1.10883286143479	0.420314254077158	2.63810434854116	0.00833709234790593	0.0615616607327655	568.327576523322	251.302077090122	390.018205608287	826.026904058031	917.528316134718	863.919800307963
FBgn0050089	158.530380440505	0.694495753983672	0.263281040631584	2.63784947187101	0.00834336078687765	0.0615616607327655	299.620395991375	176.878000413432	219.72856653988	360.245148575677	415.736079833829	349.172279133597
FBgn0031589	850.812562130238	0.238763215659225	0.0905222457665951	2.63761922428281	0.00834902712239378	0.0615616607327655	1092.66326950823	1023.57269091707	1209.60575880204	1279.63135874346	1284.78205429696	1358.39280204877
FBgn0015024	1200.18941282733	0.326684721843666	0.123883965634727	2.63702183062898	0.00836374488693539	0.0615654631700578	1192.53673483869	1057.4018166792	1135.99668901118	1467.36474602938	1410.83614264308	1366.27733738404
FBgn0040255	30.6455391964419	0.684908547970576	0.259771391349497	2.63658189769288	0.00837459818450494	0.0615654631700578	54.6926119666796	43.494590265598	56.0307844676694	84.2263305120596	67.8752783402169	94.6144240232971
FBgn0030993	318.288072152113	-0.724434394338494	0.274786655066363	-2.63635216988081	0.00838027065441249	0.0615654631700578	212.825598739905	418.514613000087	263.674279847856	191.792487551557	180.596722726649	170.080690803784
FBgn0029766	8394.15178810471	-0.918931638038919	0.348565157118077	-2.63632672191509	0.00838089923038304	0.0615654631700578	8276.41895434905	16720.2870445462	14458.1396783241	8195.32343633004	7629.90852056545	5042.72352800359
FBgn0041182	3280.24484829838	0.591421362113882	0.224341411582473	2.63625586529958	0.00838264964221264	0.0615654631700578	4864.07555555839	4150.35045778839	5582.20423294565	6636.62893432373	7092.96658655267	8262.99303136795
FBgn0025463	679.636756752862	-0.284942072464192	0.108120571117903	-2.63541035270217	0.00840356207396574	0.0616446814972264	386.415193242845	372.120383383449	398.807348269882	293.269994192593	330.891981908557	326.645035318526
FBgn0263353	183.725925528318	1.07626032312624	0.408470403574678	2.63485509282307	0.00841732093073191	0.0616446814972264	365.013736386318	156.580524956153	288.943064999942	553.052411193645	606.029270894794	548.538386896973
FBgn0023178	104.902752327687	-0.433087927880682	0.164374662348683	-2.63476086698804	0.0084196577635251	0.0616446814972264	184.290322931203	251.302077090122	196.657067053193	171.49698622335	144.234966472961	153.185257942481
FBgn0053196	2286.74524733047	0.660989447421401	0.250873795153205	2.63474886652767	0.00841995542067944	0.0616446814972264	3949.75775985455	2801.05161310451	4057.28798115889	4560.39914844814	5842.12217142581	6686.085964313
FBgn0034279	46.4523891084644	-2.44743123125301	0.929008360180863	-2.6344555508376	0.00842723369462831	0.0616494247778552	0	9.66546450346621	7.6904998288958	2.02955013282071	0	1.12636219075354
FBgn0013973	376.500468742449	0.794397875051137	0.301785333941831	2.6323276372478	0.00848020399396499	0.0619881578112315	741.917171026262	426.24698460286	678.961270608229	1006.65686587907	1086.00445344347	1109.46675789223
FBgn0265598	470.301590680861	0.769371901740146	0.292314809228283	2.63199768691605	0.00848844407903336	0.0619996488977629	677.712800456682	434.94590265598	673.468056444732	936.63738629676	992.675945725672	1113.97220665525
FBgn0035831	131.933324462727	-0.523301883108345	0.19887495799633	-2.63131109306382	0.00850561383181639	0.0620289348931861	66.5823102203056	98.5877379353554	78.0036411216574	53.7830785197489	64.2391027148481	52.9390229654163
FBgn0262601	447.952980869365	-0.442610769318152	0.168223785587695	-2.63108315968445	0.00851132065718611	0.0620289348931861	193.802081534104	217.47295132799	164.79642490491	161.349235559247	144.234966472961	118.268030029121
FBgn0011272	8927.94978076373	-0.358206824017765	0.136146611560544	-2.6310373788368	0.00851246729659125	0.0620289348931861	8938.67514707602	10001.8226681868	7734.44554220378	7073.9969879466	6892.97692715738	6843.77667101849
FBgn0031106	236.155236894974	-0.405265130844741	0.154087226913093	-2.63010204650718	0.00853592413937381	0.0621511532090036	328.155671800077	264.833727394974	241.701423193868	216.147089145406	219.382596063915	193.734296809608
FBgn0036486	756.205521998231	0.466147572124584	0.177331790754042	2.62867458870432	0.00857183422052106	0.0622798713483628	68.9602498710308	58.9593334711439	82.398212452455	90.3149809105218	95.7526248013774	103.625321549325
FBgn0046685	206.212895359563	-0.515306654960429	0.196097821975475	-2.62780407130109	0.00859379977667776	0.0622798713483628	244.927784024695	246.469344838388	244.997351691966	160.334460492836	183.020839810228	172.333415185291
FBgn0262007	356.342024762085	-1.30303901953698	0.495871250503623	-2.62777690421369	0.00859448608619775	0.0622798713483628	16.6455775550764	43.494590265598	35.1565706463808	13.1920758633346	12.1205854178959	13.5163462890425
FBgn0040389	152.442636097935	-0.460714718093556	0.17533346358618	-2.6276485313775	0.00859772977240217	0.0622798713483628	103.440374806546	95.6880985843155	99.9764977756454	71.034254648725	78.7838052163232	67.5817314452123
FBgn0042105	78.9616723475297	0.959721257365038	0.365262000509939	2.62748727221879	0.0086018059711175	0.0622798713483628	10.7007284282634	16.4312896558926	12.0850711596934	17.2511761289761	25.4532293775813	34.9172279133597
FBgn0039736	46.0325831491757	1.2754217770069	0.48543444426062	2.62738211531226	0.00860446498596935	0.0622798713483628	8.32278877753819	4.83273225173311	2.1972856653988	18.2659511953864	8.48440979252711	9.0108975260283
FBgn0036202	253.785044406948	0.925094812673702	0.352102117294148	2.62734805397626	0.00860532642405203	0.0622798713483628	483.910718922578	259.034448692895	408.695133764177	721.505072217764	742.991886117017	720.871802082264
FBgn0260866	640.280465719792	0.577521948323411	0.219817898083556	2.62727445471199	0.00860718807083741	0.0622798713483628	1112.87575653939	691.080711997834	919.564050969398	1215.70052955961	1408.4120255595	1438.36451759227
FBgn0261286	354.231448293341	0.466225740407755	0.177502590387007	2.62658555794171	0.0086246307419927	0.0623297259479951	120.085952361623	103.420470187088	103.272426273744	139.024184098219	162.415844599805	149.80617137022
FBgn0261800	488.25536315387	0.386675472188676	0.147234828341672	2.62625002890865	0.00863313767902052	0.0623297259479951	618.264309188552	561.563487651387	567.99834450559	772.243825538282	769.657174036388	742.272683706581
FBgn0040827	3399.83978984405	-0.58431805931744	0.222516295380043	-2.62595626230189	0.00864059193692849	0.0623297259479951	6208.80042804349	6451.6975560637	4500.04104273674	4513.71949539327	3931.91790956542	2999.50251397667
FBgn0052633	74.5680294868332	-1.38550061342343	0.527619929015415	-2.62594442937153	0.0086408923152254	0.0623297259479951	10.7007284282634	13.5316503048527	27.466070817485	9.13297559769321	1.21205854178959	9.0108975260283
FBgn0261617	1030.18074877109	0.778788060943404	0.296690316379763	2.62491904166686	0.00866695720202213	0.0624692775693037	1375.63808794453	845.728144053294	1322.76597057008	1845.87584580044	2176.8571410541	2056.73736031596
FBgn0013679	6470.0339651667	-0.803705729553112	0.306218195430433	-2.62461781026235	0.00867462770951977	0.062476133573288	6796.15152177262	16268.9098522343	9195.64050969398	6031.82299474316	5968.17625977193	6482.21440778661
FBgn0039209	1357.72312715507	0.532612955284007	0.202950728775375	2.62434610852519	0.00868155148214375	0.0624776050162327	2022.43767294178	1319.33590472314	1936.90731404904	2586.66164428	2689.55790423109	2357.47606524715
FBgn0037556	200.446056857517	0.520405429386742	0.198351303165105	2.62365520711283	0.00869917996923065	0.0625560520911884	185.479292756565	159.480164307192	190.065210056996	235.427815407203	289.681991487711	242.167871012011
FBgn0264308	364.811387344086	0.948324697231607	0.361569896024007	2.6227977153514	0.00872110352940092	0.0626652400435624	791.853903691491	329.592339568198	622.93048614056	1096.9718467896	1209.63442470601	1057.65409711757
FBgn0001989	640.544903002271	-0.371240986324792	0.141601058011019	-2.62173878881542	0.00874824531653719	0.0627655269071662	785.909054564678	821.564482794628	710.821912756512	653.51514276827	564.819280473948	573.318355093551
FBgn0053977	82.5191010212422	-0.658461850377124	0.251155814981891	-2.62172647853923	0.0087485612897061	0.0627655269071662	86.7947972514697	140.14923530026	97.7792121102466	74.0785798479561	72.7235125073752	59.6971961099375
FBgn0016930	729.252591076498	0.559359594993261	0.213452887525294	2.62052952985692	0.00877933263235276	0.0629281070685005	1061.7500540488	727.809477111006	950.326050284981	1306.01551047013	1379.32262055655	1350.50826671349
FBgn0039537	384.077179592041	-0.369879424795115	0.141158173220168	-2.62031886894855	0.00878475833242779	0.0629281070685005	354.313007958055	368.254197582063	299.929493326936	278.048368196438	265.44082065192	247.799681965778
FBgn0035325	20.6365312204401	-1.69215706969816	0.645885284747631	-2.6199034250476	0.00879546712422792	0.0629337330052769	7.1338189521756	23.1971148083189	18.6769281558898	8.11820053128286	1.21205854178959	5.63181095376769
FBgn0026616	739.822631326442	0.669496258615452	0.255556007327783	2.61976333726618	0.00879908076004086	0.0629337330052769	701.492196963934	485.206318074004	660.28434245234	1003.61254067984	968.43477488988	964.166035285028
FBgn0032135	299.784741029139	0.45103919058892	0.172215601566293	2.61903791809069	0.00881781454568392	0.0630192464610062	367.391676037043	298.662853157106	307.619993155832	402.865701364912	487.247533799414	440.407616584633
FBgn0259927	503.701531019453	0.91484337202702	0.349583372183557	2.61695333594602	0.00887184689127397	0.0633567069086523	1023.7030196372	468.775028418111	936.043693459889	1485.63069722476	1538.10228953099	1553.25346104913
FBgn0039137	176.506747541344	0.391320878130405	0.149615852108588	2.61550412349617	0.00890958454337526	0.0635773730501175	143.865348868875	163.346350108579	163.697782072211	196.866362883609	226.654947314653	195.987021191116
FBgn0005564	279.243792163615	0.579831376101133	0.221837177647169	2.61377007339749	0.00895492777188463	0.0638363458765038	574.272425650135	338.291257621317	462.528632566448	673.810644096477	709.054246946909	670.185503498355
FBgn0043001	195.600982583089	-0.671504010182738	0.256927678669798	-2.61359155097397	0.00895960758967923	0.0638363458765038	42.8029137130536	61.8589728221838	34.0579278136814	27.3989267930796	30.3014635447397	30.4117791503455
FBgn0030739	143.102828251356	0.412316154927577	0.157814654293918	2.61266076190662	0.00898404285500127	0.0639614322096491	102.251404981184	109.219748889168	99.9764977756454	138.009409031809	116.3576200118	159.943431087002
FBgn0035272	236.33166085765	-0.407880211753009	0.156196061016001	-2.61133481279803	0.00901895471654172	0.0641342934147542	152.188137646413	199.108568771404	177.980138897303	138.009409031809	141.810849389382	120.520754410629
FBgn0038498	225.236086648162	0.884120110745187	0.338585734550546	2.61121488747542	0.00902211828204974	0.0641342934147542	445.863684510975	256.134809341855	375.735848783195	651.485592635449	692.085427361854	644.279173111023
FBgn0036240	270.284263290293	-0.392047002039906	0.150189070801846	-2.61035639908284	0.00904479369365114	0.0642463649836274	184.290322931203	220.37259067903	187.867924391597	123.802558102064	166.052020225173	164.448879850016
FBgn0083953	149.925353638964	-0.591738338936341	0.226767677783395	-2.60944745177291	0.00906885733262408	0.0643520854379796	116.519042885535	158.513617856846	124.146640095032	88.2854307777011	84.8440979252711	92.3616996417901
FBgn0032447	90.1915602677031	0.3706592632758	0.142054688107036	2.60927159965685	0.00907351946754047	0.0643520854379796	146.2432885196	155.613978505806	156.007282243315	192.807262617968	215.746420438547	184.72339928358
FBgn0026427	781.320924758948	0.647186768893125	0.248151077985844	2.60803529102559	0.0091063565331563	0.0645175382209693	426.840167305173	375.020022734489	502.079774543626	615.968465311087	699.357778612592	726.503613036032
FBgn0260945	974.774851819335	0.550663844627071	0.21118818770113	2.60745570394477	0.00912178719191887	0.0645175382209693	1257.93007523363	909.520209776171	1324.96325623548	1640.89128238555	1745.36430017701	1727.83960061593
FBgn0050373	171.153158396098	-0.524225030201049	0.201048592837133	-2.60745436117385	0.00912182296831627	0.0645175382209693	161.699896249313	255.168262891508	180.177424562702	154.245810094374	133.326439596855	128.405289745903
FBgn0039802	398.705210055838	-0.382494736493156	0.146703890592269	-2.60725693741971	0.00912708443260869	0.0645175382209693	457.753382764601	501.637607729896	398.807348269882	370.39289923978	338.164333159295	333.403208463047
FBgn0051368	280.079262916276	0.427569280215369	0.164006040867985	2.60703372846818	0.00913303635108739	0.0645175382209693	242.54984437397	178.811093314125	198.854352718591	281.092693395669	267.864937735499	282.716909879138
FBgn0000927	728.766810715243	-3.30710903251407	1.2686325826847	-2.60682965080048	0.00913848116121925	0.0645175382209693	0	0.966546450346621	10.986428326994	0	1.21205854178959	0
FBgn0267253	128.067996782706	1.02696960162661	0.394267572694583	2.60475289562335	0.00919405416566037	0.0647385640597482	252.061602976871	106.320109538128	191.163852889696	382.570200036705	384.222557747299	351.425003515104
FBgn0261238	677.657411776253	0.581104104471074	0.223097903865283	2.60470445666747	0.009195353961588	0.0647385640597482	519.579813683456	361.488372429636	560.307844676694	672.795869030067	729.659242157332	752.409943423363
FBgn0031298	590.922776273917	-0.237875468766628	0.0913275061938263	-2.60464211364514	0.00919702709630266	0.0647385640597482	853.680334610346	939.483149736916	859.138695170931	788.480226600847	735.71953486628	725.377250845278
FBgn0040931	307.418431780602	-0.504251189878069	0.19360879531955	-2.60448493078946	0.00920124670710219	0.0647385640597482	342.423309704429	426.24698460286	303.225421825035	273.989267930796	237.563474190759	244.420595393518
FBgn0034474	547.730199472723	-0.561896947332869	0.215752408574155	-2.60436002103654	0.00920460117089558	0.0647385640597482	1110.49781688867	1674.05845200035	1106.3333325283	974.184063753943	838.744510918394	823.370761440836
FBgn0034976	244.304913863623	0.661120446455072	0.253937963777118	2.60347226787775	0.00922847333082607	0.0648574036508093	174.778564328302	151.74779270442	209.840781045585	268.915392598745	301.802576905607	277.08509892537
FBgn0029939	119.174889695272	0.944481731596005	0.362857055124423	2.60290303924818	0.00924380925265286	0.0649161166398537	229.471176294982	85.0560876305027	165.895067737609	292.255219126183	329.679923366768	300.738704931194
FBgn0034087	1033.91304414471	0.654324108956516	0.251440140432013	2.60230569324486	0.00925992715345088	0.0649802284322916	881.026640593686	591.526427612132	798.713339372464	1058.410394266	1209.63442470601	1305.45377908335
FBgn0044871	272.900421367571	-0.410449248915879	0.157801899478735	-2.60104124393756	0.00929412793818523	0.0651411614214401	198.557960835554	219.406044228683	196.657067053193	163.378785692067	153.931434807278	145.300722607206
FBgn0053192	69.50483766348	-1.07527392334738	0.413443836156633	-2.60077386409507	0.00930137444033771	0.0651411614214401	9.51175860290079	24.1636612586655	32.959284980982	16.2364010625657	4.84823416715835	10.1372597167818
FBgn0065032	101.819067997513	-0.87677935105716	0.337134457546268	-2.60068151276655	0.00930387850803103	0.0651411614214401	26.1573361579772	49.2938689676777	34.0579278136814	18.2659511953864	23.0291122940022	19.1481572428101
FBgn0035721	84.1863726768137	-0.665349238951436	0.25588429974631	-2.60019563377308	0.00931706282382413	0.0651498395897945	51.1257024905918	70.5578908753034	37.3538563117796	38.5614525235936	36.3617562536876	25.9063303873314
FBgn0040208	321.759853816556	0.351416298080887	0.135153905616185	2.60011944515205	0.00931913171159676	0.0651498395897945	194.991051359466	212.640219076257	217.531280874481	266.885842465924	244.835825441497	286.095996451399
FBgn0026189	677.040684202785	0.470440124663394	0.180966827329707	2.59959314977816	0.00933343436299475	0.0652008059407402	732.405412423361	576.061684406586	783.332339714672	952.873787359325	934.497135719772	1009.22052291517
FBgn0035016	493.601823905688	0.630126442178138	0.242456966696264	2.59892075185253	0.00935173600392465	0.0652796106340025	430.407076781261	301.562492508146	457.035418402951	604.805939580573	631.482500272375	602.603772053143
FBgn0035719	76.4470303579907	0.595631736220908	0.229220230827433	2.59851294133512	0.00936285157262517	0.0653081724848228	141.487409218149	107.286655988475	148.316782414419	180.629961821044	199.989659395282	218.514265006186
FBgn0033130	245.109685764758	-0.483277975153745	0.186050439607815	-2.59756427435738	0.00938875471728891	0.0654050079919964	363.824766560955	423.34734525182	402.103276767981	293.269994192593	272.713171902657	284.969634260645
FBgn0032470	33.3600086262162	0.962009614544657	0.370361330064605	2.59748936093529	0.00939080293281514	0.0654050079919964	54.6926119666796	27.0633006097054	48.3402846387736	72.0490297151353	96.964683343167	83.3508021157618
FBgn0000439	154.231831252311	0.466365534394957	0.179578254844074	2.59700449143966	0.00940406944102284	0.0654483814840048	340.045370053703	266.766820295667	283.449850836445	402.865701364912	415.736079833829	409.995837434288
FBgn0267791	652.400764656512	0.282292744580992	0.108746460712129	2.59587983583457	0.00943490551181461	0.0656138754292088	838.223726880633	768.404428025564	808.601124866759	964.036313089839	947.829779679457	1023.86323139497
FBgn0259704	185.775645154416	-0.451596079260504	0.173990649956041	-2.5955192383878	0.00944481153391525	0.0656336753679701	83.2278877753819	112.119388240208	105.469711939142	77.1229050471871	73.9355710491648	69.8344558267193
FBgn0000618	95.0551571839034	-0.623596144695654	0.240296151309091	-2.59511499164015	0.00945592768024524	0.0656362505845296	64.2043705695804	82.1564482794628	70.3131412927616	45.6648779884661	42.4220489626356	52.9390229654163
FBgn0085414	551.679017453187	0.992645181749157	0.382523345172329	2.59499242144807	0.0094593004714207	0.0656362505845296	1051.04932562054	516.135804485096	956.917907281178	1609.43325532683	1736.87989038448	1674.90057765051
FBgn0000318	535.166646209819	-0.421285236509315	0.162492457429391	-2.59264487210047	0.00952410591519182	0.0660169193358662	487.477628398666	569.29585925416	552.617344847798	441.427153888505	381.79844066372	378.457696093189
FBgn0030855	276.791978996116	-0.497602096187168	0.191969150282031	-2.5920940706156	0.00953936833284949	0.0660169193358662	115.330073060172	169.145628810659	146.11949674902	89.3002058441114	117.56967855359	100.246234977065
FBgn0033698	546.274810217847	0.347629495889027	0.134115635333862	2.59201319088301	0.00954161130290447	0.0660169193358662	463.698231891414	407.882602046274	514.164845703319	569.28881225621	626.634266105217	566.560181949029
FBgn0261930	37.2449852248409	1.14109812978019	0.440279190039866	2.59176030935477	0.00954862728926568	0.0660169193358662	8.32278877753819	8.69891805311959	6.5918569961964	18.2659511953864	16.9688195850542	16.8954328613031
FBgn0266005	90.721475705627	0.565234468645371	0.218106934387043	2.59154744544862	0.00955453658566195	0.0660169193358662	72.5271593471186	67.6582515242635	84.5954981178538	99.447956508215	110.297327302852	122.773478792136
FBgn0052227	95.3902318071583	0.691926039015002	0.267001646555648	2.59146731093582	0.00955676203765067	0.0660169193358662	184.290322931203	114.052481140901	186.769281558898	242.531240872075	256.956410859393	282.716909879138
FBgn0031054	181.860664742925	-0.354271766144977	0.136840066589847	-2.58894763042496	0.00962697340163856	0.0664438262174249	194.991051359466	179.777639764472	193.361138555094	159.319685426426	139.386732305803	144.174360416453
FBgn0261509	82.4180010003654	1.08249065381785	0.418191491119831	2.58850473241137	0.00963936224822096	0.0664438262174249	161.699896249313	65.7251586235703	130.738497091229	214.117539012585	272.713171902657	270.326925780849
FBgn0003249	2012.48538651443	-0.334190598510226	0.129106791613961	-2.58848194066723	0.00964000016856379	0.0664438262174249	3811.83726011249	4450.94640384619	3544.22177828827	3158.99478173544	3179.22955511409	3028.78793093626
FBgn0003141	297.887280589371	0.310502749922325	0.119997144501426	2.58758448971787	0.00966514894748281	0.066567818454589	280.596878785573	281.265017050867	260.378351349758	327.772346450545	327.255806283189	364.941349804146
FBgn0039831	1099.04266047769	0.350441551354548	0.135465910525508	2.58693534037525	0.00968337614076684	0.0666439906416359	1116.44266601548	844.761597602947	1011.85004891615	1317.17803620064	1307.81116659096	1162.40578085765
FBgn0003512	190.87026546736	-0.385649333532622	0.149092178465584	-2.5866503360647	0.00969138833273491	0.0666497993474624	155.755047122501	140.14923530026	152.711353745217	110.610482238729	118.78173709538	113.762581266107
FBgn0034140	1181.82944305704	-0.429170790915212	0.166039486516406	-2.58475137402214	0.00974492398172553	0.0669594805065942	2190.08241831791	1907.96269298423	1900.65210056996	1496.79322295528	1513.86111869519	1443.99632854604
FBgn0086710	5787.5890863455	-0.492446175617168	0.190535124236959	-2.5845427586608	0.00975082131704975	0.0669594805065942	4841.4851288765	6110.50665909134	4414.34690178619	3892.67715475013	3467.69948806001	3562.68360935344
FBgn0045063	518.336025495694	0.392408387899799	0.151854117405743	2.58411424466887	0.00976294493175686	0.0669932560704615	644.421645346529	521.935083187175	638.311485798352	787.465451534437	819.351574249761	760.294478758638
FBgn0287612	21.8649241784195	0.727986375853504	0.281801752253158	2.583328066745	0.00978522259261976	0.0670966074234355	22.5904266818894	32.8625793117851	35.1565706463808	54.7978535861593	50.9064587551627	45.0544876301415
FBgn0037138	1136.01162884617	0.229685139381688	0.0889247293116741	2.58291637387683	0.00979690665929019	0.0671272204259987	1545.66077297138	1327.06827632591	1411.75604001873	1657.12768344811	1712.63871954869	1651.24697164469
FBgn0036007	4737.22280956538	0.338193574763727	0.130956733655627	2.58248327766836	0.00980921158184993	0.0671620392400888	5707.05516174048	4285.66696083692	5392.13902288866	6473.25014863167	6294.22000751333	6678.20142897772
FBgn0033926	26477.5333553086	-1.24078303796901	0.480582207313076	-2.58183307473283	0.00982771069598607	0.0672391862040313	21910.335941782	51477.2973990107	31951.8295033967	16570.2620594147	15690.0978234662	12313.3914693177
FBgn0022987	336.627609641616	0.460515465622731	0.178433135575068	2.58088535035012	0.0098547303598358	0.0672714855018255	366.202706211681	302.529038958492	374.637205950496	520.579609068513	476.339006923308	437.028530012373
FBgn0033480	175.020246929807	-0.450611050741863	0.174597073636983	-2.58086256175611	0.0098553808777822	0.0672714855018255	129.597710964523	184.610372016205	115.357497433437	90.3149809105218	117.56967855359	109.257132503093
FBgn0034654	1186.96442083657	-0.392987250212409	0.152292826087448	-2.58047119032877	0.00986655884884459	0.0672714855018255	860.814153562522	1107.66223209723	872.322409163324	767.16995020623	689.661310278275	707.355455793221
FBgn0261797	3463.81686660643	0.622375981061636	0.241187830723446	2.58046178861848	0.00986682751025582	0.0672714855018255	3930.73424264875	2569.08046502132	4085.85269480907	4988.63422647332	5516.07842368441	5789.50166047318
FBgn0259789	210.688775805371	1.06456274189479	0.412557330884237	2.58039952801979	0.00986860682130458	0.0672714855018255	86.7947972514697	32.8625793117851	64.8199271292646	108.580932105908	141.810849389382	134.037100699671
FBgn0261885	1185.20225509724	0.589554221058659	0.228550850169554	2.57953195370434	0.00989343051001253	0.0673330490688613	1526.63725576558	1050.63599152678	1485.36510980959	1884.43729832403	2140.49538480041	2087.1491394663
FBgn0011747	3797.1820310779	0.379497619408865	0.14712229931681	2.57947042135103	0.00989519323088685	0.0673330490688613	4218.4649403865	3563.65676242799	4295.69347585466	5194.63356495462	5192.45879302659	5323.18771350122
FBgn0015558	201.498523698969	0.963700100067832	0.373624935731685	2.57932490019859	0.009899363097132	0.0673330490688613	386.415193242845	207.807486824524	319.705064315526	591.613863717238	607.241329436583	582.329252619579
FBgn0030039	189.442269974222	-0.41956651607682	0.16271048773954	-2.57860769705542	0.0099199372239776	0.0673756785669656	127.219771313798	179.777639764472	120.850711596934	108.580932105908	123.629971262538	90.108975260283
FBgn0035251	424.099515593144	-0.33103633858573	0.128378259988597	-2.57860122590174	0.00992012303271413	0.0673756785669656	451.808533637788	453.310285212565	449.344918574055	355.171273243625	363.617562536876	358.183176659625
FBgn0004057	330.062023145374	0.403645255697482	0.1566394427335	2.57690686747544	0.00996888061885948	0.067657410214712	442.296775034887	397.250591092461	414.188347927674	555.081961326465	482.399299632256	619.499204914446
FBgn0011818	380.23450603623	0.462840597797541	0.179640883733704	2.57647695879545	0.00998128575878927	0.0676921918200019	335.289490752253	209.740579725217	285.647136501844	360.245148575677	404.827552957722	377.331333902435
FBgn0039907	969.62217895725	0.435660460596047	0.169129750723182	2.57589488977075	0.00999810344037907	0.0677216877913394	927.396463782827	802.233553787696	923.958622300196	1240.05513115346	1133.27473657326	1214.21844163231
FBgn0261556	704.367608224577	0.556573474914042	0.216076035285175	2.57582232189461	0.0100002019076693	0.0677216877913394	953.553799940805	722.010198408926	936.043693459889	1245.12900648551	1333.26439596855	1261.52565364396
FBgn0030156	59.71310160409	-0.577473515897117	0.224313540503365	-2.57440328658383	0.0100413154968426	0.067870353092177	124.841831663073	127.584131445754	103.272426273744	78.1376801135975	64.2391027148481	95.7407862140507
FBgn0031231	260.080747456745	-0.326994399860965	0.127019749616262	-2.57435871861536	0.0100426091954841	0.067870353092177	166.455775550764	185.576918466551	158.204567908714	138.009409031809	130.902322513275	138.542549462685
FBgn0033274	166.108238922738	-0.459096478568522	0.178338234060737	-2.57430203336076	0.0100442548436405	0.067870353092177	197.368991010191	217.47295132799	152.711353745217	153.231035027964	134.538498138644	125.026203173643
FBgn0051660	180.283555719251	0.821739668991852	0.319292256742965	2.57362855389683	0.0100638252313196	0.067870353092177	380.470344116032	183.643825565858	324.099635646323	497.239782541075	539.366051096366	531.64295403567
FBgn0030082	274.899272342563	-0.382544585088555	0.148642774130446	-2.57358346092788	0.0100651367831538	0.067870353092177	183.10135310584	236.803880334922	206.544852547487	164.393560758478	153.931434807278	163.322517659263
FBgn0260748	434.199136399597	0.507122379506444	0.197064644549375	2.57338083483252	0.0100710321446826	0.067870353092177	284.163788261661	211.67367262591	294.436279163439	357.200823376446	378.162265038351	386.342231428463
FBgn0052708	104.66542771359	-0.502806882018966	0.195393457033766	-2.57330460114678	0.0100732509429129	0.067870353092177	57.0705516174048	81.1899018291162	74.7077126235592	48.7092031876971	55.754692922321	47.3072120116486
FBgn0264855	1495.0721940589	0.437261141781396	0.169942165472658	2.57299970590139	0.0100821293390582	0.0678809837759326	1307.86680789886	962.680264545235	1285.4121142583	1609.43325532683	1639.91520704131	1563.39072076591
FBgn0010408	10985.2264699585	-0.495170210933251	0.19258177898245	-2.57122046306559	0.0101340791160292	0.0681813803334587	9619.95485700879	11991.9418094505	8416.70274131011	7614.87209834332	6886.91663444844	6803.22763215137
FBgn0044328	103.051637863706	0.773167731999955	0.300731700872867	2.57095520610516	0.0101418443870233	0.0681842871370515	206.880749613092	128.550677896101	186.769281558898	269.930167665155	296.954342738449	324.392310937019
FBgn0028644	161.990563748213	0.938108002610708	0.364960503198238	2.57043705932516	0.010157028170289	0.068227561122277	347.179189005879	150.781246254073	268.068851178654	515.505733736461	523.609290053102	426.891270295591
FBgn0005586	352.652447486517	0.742770699541142	0.28899358251782	2.57019790221585	0.0101640432591576	0.068227561122277	743.106140851625	421.414252351127	597.661700988474	1026.95236720728	998.73623843462	921.364272036394
FBgn0034645	517.851169385666	-0.549196360969263	0.213696337281641	-2.5699849045398	0.0101702946564289	0.068227561122277	619.453279013914	723.943291309619	583.379344163382	463.752205349533	403.615494415933	449.418514110661
FBgn0033453	792.678455631436	-0.664856259444632	0.258749146089228	-2.5695012698336	0.0101845018555628	0.0682513979471832	708.626015916109	1369.59632014116	887.703408821116	707.298221288019	746.628061742386	417.880372769562
FBgn0062449	242.250234863291	0.335976180875465	0.130762376212311	2.56936429734162	0.0101885287535696	0.0682513979471832	190.235172058016	171.078721711352	181.276067395401	256.73809180182	218.170537522126	207.250643098651
FBgn0259099	94.7280472517264	0.59170639958945	0.230343877201781	2.56879586632605	0.0102052553900986	0.0683142293859874	133.164620440611	166.245989459619	152.711353745217	174.541311422581	248.472001066865	260.189666064067
FBgn0261953	58.0080667952534	0.899581187346529	0.350266669396142	2.56827516274216	0.0102205990493233	0.0683677193961211	120.085952361623	61.8589728221838	98.877854942946	172.511761289761	169.688195850542	180.217950520566
FBgn0016672	1071.72155427048	-0.349401294442358	0.136065583937274	-2.56788883957189	0.0102319961653999	0.0683947522256564	1789.39958717071	2039.41301023137	1615.00496406812	1439.9658192363	1399.92761576697	1433.85906882925
FBgn0028515	522.054374382241	-0.394053016773738	0.153499059432055	-2.56713636052058	0.0102542279157049	0.0684941172128045	496.989387001567	538.366372843068	471.317775228043	359.230373509266	397.555201706985	390.847680191478
FBgn0266414	759.390153966271	0.455515698787447	0.177505737623856	2.56620267539019	0.0102818731099181	0.0686294732060432	1353.04766126264	1112.49496434896	1335.94968456247	1728.16193809684	1746.5763587188	1736.85049814195
FBgn0261394	1268.43818255773	-0.398142772932911	0.155226101139289	-2.56492155643106	0.0103199133179201	0.068833969892411	754.995839105251	862.159433709186	750.37305473369	572.333137455441	584.212217142581	640.900086538763
FBgn0031384	489.157599076201	0.602584441738546	0.234982311250126	2.56438213809689	0.0103359676795645	0.0688916326054417	521.957753334181	356.655640177903	488.896060551233	679.899294494939	710.266305488698	684.828211978151
FBgn0003209	803.885114374948	0.367814590881672	0.14345736011818	2.56392973200306	0.0103494494856544	0.068932078307747	1219.88304082203	790.634996383536	1096.445547034	1314.13371100141	1392.65526451624	1298.69560593883
FBgn0053203	235.553360858289	0.636433171393644	0.248266702388842	2.5635059606054	0.0103620921637974	0.0689668811302709	493.422477525479	308.328317660572	424.076133421969	611.909365045445	620.573973396269	671.311865689108
FBgn0028424	414.970807376645	-0.526390379396087	0.205473452654693	-2.56184131134794	0.0104118879781791	0.0692163451604133	456.564412939238	733.608755813086	580.083415665283	408.954351763374	418.160196917408	403.237664289766
FBgn0038446	88.9046927421219	-0.606853546789988	0.236900599781461	-2.56163786562721	0.0104179883702195	0.0692163451604133	70.1492196963934	84.089541180156	75.8063554562586	64.9456042502628	48.4823416715835	37.1699522948667
FBgn0035528	480.739908402037	-0.423356154194796	0.165280401729858	-2.56144194813096	0.0104238660315042	0.0692163451604133	454.186473288513	593.459520512825	492.191989049331	361.259923642087	383.01049920551	405.490388671273
FBgn0051665	508.426208492088	0.964782184078591	0.376682755362975	2.56125923032743	0.0104293503516605	0.0692163451604133	961.876588718343	477.473946471231	920.662693802097	1567.827477604	1517.49729432056	1519.46259532652
FBgn0010350	1576.8873246076	0.363041479200415	0.141771489131923	2.56075097626007	0.010444619228953	0.0692682379392335	2286.38897417228	2306.17983052704	2296.16352034175	3045.33997429748	2882.27521237564	2931.92078253146
FBgn0267242	10.2170081789016	1.04802829061683	0.409740748011652	2.5577839053172	0.0105341530369571	NA	9.51175860290079	10.6320109538128	8.7891426615952	20.2955013282071	20.604995210423	19.1481572428101
FBgn0040512	428.743736327312	-0.388564317338824	0.152008975929299	-2.55619324426966	0.010582433109916	0.0701321903463998	388.79313289357	420.44770590078	381.229062946692	331.831446716187	273.925230444447	302.991429312702
FBgn0032719	94.5086969608208	0.644188741453501	0.25205462966243	2.55575048280702	0.0105959068656667	0.0701415582573854	152.188137646413	135.316503048527	185.670638726199	262.826742200282	248.472001066865	227.525162532215
FBgn0039114	630.425312930993	0.43471442520714	0.170099286925245	2.55565107335334	0.0105989341096608	0.0701415582573854	787.098024390041	940.449696187262	1039.31611973363	1276.58703354423	1119.94209261358	1343.75009356897
FBgn0001078	614.328326065356	0.751538259737438	0.29410581745122	2.5553328602964	0.0106086295937882	0.0701557880249236	763.318627882789	420.44770590078	651.495199790744	1066.52859479729	1079.94416073452	941.638791469957
FBgn0032782	392.607808091261	-0.251936883461337	0.0986034797152828	-2.55505063501616	0.0106172351825668	0.0701627951154986	592.106973030574	527.734361889255	575.688844334486	479.988606412099	464.218421505412	477.5775688795
FBgn0010611	687.77689215456	0.247101748690012	0.0967572827996607	2.55383100413893	0.0106544954883449	0.0703590192120958	533.847451587807	520.968536736829	517.460774201418	624.08666584237	647.23926131564	594.719236717868
FBgn0010051	1248.88120054183	0.487803488071456	0.191066797513396	2.55305209706703	0.0106783522732186	0.0704665148590391	1787.02164751999	1485.58189418276	2032.48924049389	2309.62805114997	2622.89468443267	2506.15587442662
FBgn0263512	24.2182833911671	1.12647899714068	0.441329154689726	2.55246902492233	0.0106962419961606	0.0705345092768091	36.8580645862406	17.3978361062392	45.0443561406754	76.1081299807768	60.6029270894794	78.8453533527476
FBgn0283478	1529.42545620044	-0.324398981944089	0.127176479429104	-2.55077812658691	0.0107482726527048	0.0708273842132173	1034.40374806546	1176.28703007184	1049.20390522793	815.879153393927	886.014794048188	903.342476984337
FBgn0024728	543.508114920337	0.440587189903249	0.172875696884251	2.54857795424098	0.0108163110136268	0.0712252548191942	596.862852332025	419.481159450434	581.182058497983	727.593722616226	728.447183615542	709.608180174729
FBgn0034920	340.294855676202	-0.483057267449326	0.189578793888319	-2.54805538922194	0.0108325270263637	0.0712815543461643	441.107805209524	612.790449519758	452.640847072153	373.437224439011	353.92109420256	351.425003515104
FBgn0001247	762.22390473613	0.185095522973411	0.0726796502546674	2.54673106330095	0.0108737197567552	0.0715020129408133	837.03475705527	836.062679549827	927.254550798294	957.947662691377	1022.97740927041	976.556019383317
FBgn0261041	355.70899810475	0.78972600042206	0.310338718613467	2.54472275953965	0.0109364530663179	0.0718637036117483	687.224559059582	412.715334298007	532.841773859209	856.470156050341	932.073018636193	1032.87412892099
FBgn0040271	629.651044676067	0.448857930666335	0.176469574882107	2.5435428796505	0.0109734587304783	0.0720486082285598	894.105308672675	687.214526196448	896.492551482711	1089.86842132472	1158.72796595085	1131.99400170731
FBgn0020908	216.724077988232	0.674929354619322	0.265393878324137	2.543123296141	0.0109866453107279	0.0720486082285598	80.8499481246567	50.2604154180243	82.398212452455	115.684357570781	121.205854178959	102.498959358572
FBgn0052406	117.264100673172	0.817727257044108	0.321549279049364	2.54308533815301	0.0109878389404278	0.0720486082285598	255.628512452959	111.152841789861	174.684210399205	329.801896583366	312.711103781714	309.749602457223
FBgn0053198	112.163664891984	-0.652920573698107	0.256884855819817	-2.54168573548016	0.0110319314825207	0.0722867504753192	76.0940688232064	96.6546450346621	78.0036411216574	47.6944281212868	66.6632197984273	46.180849820895
FBgn0259209	652.674212544612	-0.446377303783342	0.175668344716678	-2.54102299707594	0.0110528649268742	0.0723729141479412	930.963373258915	1232.34672419194	864.631909334428	848.351955519058	665.420139442483	708.481817983975
FBgn0283536	1931.63014330893	-0.374994126390482	0.147670669123497	-2.53939478040066	0.0111044441676549	0.0726594805565485	1313.81165702567	1612.19947917816	1327.16054190088	1130.45942398114	1133.27473657326	1017.10505825044
FBgn0035978	5636.72210825172	0.318086863611198	0.125360981736717	2.53736736267145	0.0111689682520239	0.073030286081096	7779.42956734749	7569.02525266439	7582.83283129126	9503.36849693299	8644.40152004334	10439.1247839038
FBgn0262126	724.986964480547	0.366826921497426	0.144621620062037	2.53645977233606	0.0111979607386263	0.0731684040391761	890.538399196587	688.181072646794	772.345911387678	954.903337492146	1038.73417031368	1036.25321549325
FBgn0036213	10477.5262736298	-0.437107652132409	0.172397312767879	-2.53546673735538	0.0112297592649359	0.0732716090710647	9341.73591787394	11833.4281915937	8660.60145016937	7620.96074874178	7065.08924009151	7351.76601904834
FBgn0266717	3769.0082661959	0.453964314051054	0.179048698309729	2.53542370504006	0.0112311390376221	0.0732716090710647	4381.35380646118	3633.24810685295	5038.37603075945	5469.63760795182	6042.11183082109	6367.32546432975
FBgn0001316	1692.17524809191	0.480365446290704	0.189509012387615	2.53478945533304	0.0112514928612684	0.0732716090710647	1777.50988891709	1500.08009093796	1887.46838657757	2261.93362302869	2413.20855670307	2529.80948043245
FBgn0050185	201.062287405922	-0.465472038828012	0.183639089759373	-2.53471109793636	0.011254009714834	0.0732716090710647	148.621228170325	182.677279115511	124.146640095032	110.610482238729	124.842029804328	95.7407862140507
FBgn0033945	239.280506024612	-0.774377565733262	0.305525854377676	-2.53457294902452	0.0112584483002813	0.0732716090710647	186.668262581928	368.254197582063	259.279708517059	177.585636621812	166.052020225173	132.910738508917
FBgn0034507	21.8971342943667	-1.53932592598927	0.607350782089418	-2.53449237472562	0.0112610377890462	0.0732716090710647	13.0786680789886	35.762218662825	25.2687851520862	10.1477506641036	13.3326439596855	2.25272438150707
FBgn0030310	622.001934308741	-0.897593666285679	0.354220041365761	-2.53400022998371	0.011276865771353	0.0733232852741537	628.965037616815	1239.11254934437	796.516053707065	476.944281212868	540.578109638156	413.374924006548
FBgn0033912	11976.5811568455	-0.400564780849999	0.158097843257603	-2.53365114030888	0.0112881048987831	0.0733373183399638	10239.4081360227	12898.5623798757	9474.69578919963	8634.72104008573	7886.86493142485	8185.27404020596
FBgn0051704	127.485069070282	-0.840459908625249	0.331746080567461	-2.53344337086852	0.0112947988667271	0.0733373183399638	180.723413455115	293.830120905373	235.109566197672	124.817333168474	170.900254392332	101.372597167818
FBgn0031808	99.5629333573972	-0.438820724763743	0.173334703042806	-2.53163802204902	0.0113531125807035	0.0736481676797129	254.439542627596	234.870787434229	236.208209030371	183.674287020275	190.293191060965	161.069793277756
FBgn0262146	108.73938040591	-0.866819623863585	0.34241733789634	-2.53147118422489	0.0113585149981403	0.0736481676797129	21.4014568565268	30.9294864110919	38.452499144479	18.2659511953864	18.1808781268438	13.5163462890425
FBgn0030158	790.811385534321	-0.491562347760801	0.19428190727754	-2.53014989737867	0.0114013805907901	0.0738745900579559	1338.78002335829	1916.66161103735	1533.70539444836	1152.78447544217	1107.82150719568	1146.6367101871
FBgn0030500	172.709488243352	-1.60646757601435	0.63509417357011	-2.52949506210044	0.0114226781308253	0.0739610454459707	4.7558793014504	6.76582515242635	12.0850711596934	4.05910026564143	2.42411708357917	1.12636219075354
FBgn0035496	20.247048982695	-1.37941985559792	0.545481579924891	-2.52881106597193	0.0114449617846965	0.0740537610814948	13.0786680789886	13.5316503048527	10.986428326994	4.05910026564143	4.84823416715835	5.63181095376769
FBgn0037718	858.568889202695	0.199458061118902	0.078895621674793	2.52812585647739	0.0114673236484315	0.0741468534653104	866.759002689335	838.962318900867	873.421051996023	997.523890281381	1021.76535072862	941.638791469957
FBgn0030366	1895.29619962406	0.411955831390231	0.162967062092473	2.52784719869635	0.0114764287526612	0.0741477157338779	1645.53423830184	1340.59992663076	1642.4710348856	2000.12165589481	2094.43716021241	2062.36917126973
FBgn0029155	866.430355219819	0.331018740007379	0.130959928322603	2.52763379032979	0.0114834061794778	0.0741477157338779	721.704683995098	620.522821122531	740.485269239396	900.105483905987	858.137447587028	859.414351544949
FBgn0000078	2402.25257909617	-0.291855562176662	0.11549449598135	-2.52700840587062	0.0115038749301156	0.0741802276314246	1290.03226051842	1433.38838586404	1540.29725144456	1189.31637783294	1086.00445344347	1207.46026848779
FBgn0038893	177.683225363348	-0.526327303234226	0.208282103446377	-2.52699245170496	0.0115043975311373	0.0741802276314246	134.353590265974	184.610372016205	159.303210741413	107.566157039498	115.145561470011	110.383494693847
FBgn0034013	196.888531563826	0.625493708267807	0.247576419899951	2.52646721574121	0.0115216141391366	0.0742397562478811	394.737982020383	249.368984189428	362.552134790802	507.387533205179	489.671650882993	554.17019785074
FBgn0262740	451.645987978274	0.782956212776877	0.310002753302765	2.5256427707021	0.0115486845793484	0.074345688649141	495.800417176204	304.462131859186	507.572988707123	719.475522084943	781.777759454284	747.904494660349
FBgn0040588	114.996354325912	-0.66944638238952	0.265076922055969	-2.52547968792309	0.0115540460419454	0.074345688649141	235.416025421795	294.796667355719	235.109566197672	170.48221115694	159.991727516226	150.932533560974
FBgn0004638	908.453085419823	0.229004254977679	0.0906949567130351	2.52499436878573	0.0115700143237125	0.0743495739927874	973.766286971969	995.54284385702	1040.41476256633	1200.47890356345	1138.12297074042	1188.31211124498
FBgn0046113	24.400858039186	-0.899134758569704	0.356096458462707	-2.52497529026639	0.0115706424572557	0.0743495739927874	52.3146723159544	58.9593334711439	50.5375703041724	23.3398265274382	23.0291122940022	40.5490388671274
FBgn0031575	255.332296820302	0.371604573039207	0.147238821169603	2.52382197906325	0.0116086698629753	0.0744971992137351	202.124870311642	203.941301023137	194.459781387794	260.797192067462	260.592586484761	255.684217301053
FBgn0003285	96.3567892520491	0.773097974412144	0.306323896530314	2.52379257109521	0.0116096409615726	0.0744971992137351	133.164620440611	82.1564482794628	117.554783098836	164.393560758478	193.929366686334	209.503367480158
FBgn0266974	16.0859949146554	0.895463520017337	0.354890139955629	2.52321329673824	0.0116287842351605	NA	23.779396507252	17.3978361062392	32.959284980982	38.5614525235936	43.6341075044251	55.1917473469233
FBgn0052368	1037.23049240535	-1.25829790679544	0.498842326351028	-2.52243612926702	0.0116545112700162	0.0747335488197313	819.200209674831	2064.54321794038	1187.63290214805	664.677668498784	735.71953486628	301.865067121948
FBgn0023170	6374.24643675054	-0.474753085457141	0.188359375794966	-2.52046431696568	0.0117200120630687	0.0751017726825728	5728.456618597	7231.70054149342	5072.43395857313	4512.70472032686	4518.55424379158	3945.64675420964
FBgn0032486	89.0922510044749	-0.492768532325147	0.195576805547561	-2.51956529786613	0.0117499844281245	0.0752419801740372	64.2043705695804	75.3906231270365	65.918569961964	51.7535283869282	46.0582245880043	48.4335742024021
FBgn0035558	476.476073913124	0.532378184037762	0.211341957324852	2.51903687642794	0.011767633158889	0.0752767212466446	356.69094760878	260.967541593588	324.099635646323	464.766980415944	431.492840877093	464.061222590457
FBgn0003028	502.382130830159	0.738298264518274	0.293145045750728	2.51854252773583	0.0117841651778369	0.0752767212466446	186.668262581928	136.283049498874	175.782853231904	276.018818063617	266.652879193709	288.348720832906
FBgn0053639	57.0598216388316	0.793895443140231	0.315229486475919	2.51846821823528	0.0117866520177732	0.0752767212466446	122.463892012348	81.1899018291162	80.2009267870562	142.06850929745	195.141425228124	154.311620133235
FBgn0052452	81.2612676337408	0.848463077132243	0.336930988322584	2.51821027610529	0.0117952879152212	0.0752767212466446	14.2676379043512	25.1302077090122	27.466070817485	44.6501029220557	50.9064587551627	25.9063303873314
FBgn0024150	111.92320368611	0.488041222596139	0.193806176491567	2.51819230651493	0.0117958897457906	0.0752767212466446	211.636628914543	136.283049498874	179.078781730002	244.560791004896	236.35141564897	255.684217301053
FBgn0027603	1002.24534934923	0.540324492745439	0.214879449847723	2.51454707804002	0.0119185388797494	0.0760072527461657	470.832050843589	398.217137542808	597.661700988474	671.781093963656	728.447183615542	732.135423989799
FBgn0052137	293.603001893694	0.397260749894238	0.158038390563829	2.51369776974407	0.0119472770230384	0.0760460452317813	332.911551101528	260.000995143241	305.422707490433	369.37812417337	399.979318790564	412.248561815795
FBgn0036741	1208.08055202154	0.310522797620476	0.123534021413747	2.51366218040015	0.0119484826037921	0.0760460452317813	1517.12549716268	1371.52941304186	1616.10360690082	1833.69854500352	1792.6345833068	1958.7438497204
FBgn0031344	131.987485014124	-0.460134784006942	0.183055001454665	-2.51364224058581	0.0119491581075105	0.0760460452317813	95.1175860290079	115.019027591248	90.0887122813508	70.0194795823146	69.0873368820065	79.9717155435012
FBgn0000319	4914.33946749107	0.245129529407797	0.0975640498683318	2.51249850471165	0.0119879613128162	0.0762408100455302	5312.31717972009	4746.70961765226	5445.97252169093	5940.49323876623	6072.41329436583	6361.69365337598
FBgn0259163	1169.64672990361	0.447060437570797	0.178020883238326	2.51128086457303	0.012029394576688	0.0764520237689989	2118.74422879615	1606.40020047608	2207.1734508931	2677.99140025693	2575.62440130287	2831.67454755439
FBgn0000028	39.785542961403	0.894238918181985	0.356160977301205	2.51077174416479	0.012046756277909	0.076488855484812	73.7161291724812	30.9294864110919	71.411784125461	103.507056773856	115.145561470011	107.004408121586
FBgn0032453	937.02344586894	-0.422449912076511	0.168266106251954	-2.51060609582274	0.0120524098995993	0.076488855484812	633.720916918265	799.333914436656	667.974842281235	540.87511039672	478.763124006887	548.538386896973
FBgn0036726	573.234541948085	-0.370120123513482	0.147435446125781	-2.51038765262543	0.0120598690192229	0.076488855484812	668.201041853781	721.04365195858	561.406487509394	529.712584666206	452.097836087516	527.137505272656
FBgn0045852	45.7314339414374	0.625714316492659	0.249302126360255	2.50986353637621	0.0120777825612978	0.076495291496452	58.2595214427674	56.059694120104	74.7077126235592	101.477506641036	83.6320393834815	105.878045930833
FBgn0259992	65.0645902886255	-0.735424981003488	0.293059461503184	-2.50947359703484	0.012091125425372	0.076495291496452	90.3617067275575	142.082328200953	121.949354429633	53.7830785197489	83.6320393834815	76.5926289712405
FBgn0038606	135.133641838502	0.984260908800636	0.392219299240945	2.50946577770512	0.0120913931191499	0.076495291496452	310.321124419638	117.918666942288	216.432638041782	382.570200036705	465.430480047202	425.764908104837
FBgn0036816	1781.87945509807	0.348212542509233	0.138763504247494	2.50939571177284	0.012093792052031	0.076495291496452	2229.31842255487	1765.88036478328	2169.81959458132	2569.41046815102	2635.01526985056	2641.31933731705
FBgn0038585	320.378668724613	-0.394971247125442	0.157564400807405	-2.50672896353172	0.0121854108979636	0.0770224000878758	122.463892012348	154.647432055459	176.881496064603	119.743457836422	100.600858968536	125.026203173643
FBgn0000097	346.432062735985	0.468863194291478	0.187136698030178	2.50545830522171	0.0122292816014147	0.0772471877241534	360.257857084868	294.796667355719	359.256206292704	450.560129486199	521.185172969523	431.396719058605
FBgn0085371	22.2955298666379	0.745467170067453	0.297588095242721	2.50503021453002	0.0122440933302596	0.0772882415375108	38.0470344116032	36.7287651131716	40.6497848098778	65.9603793166732	65.4511612566377	61.9499204914446
FBgn0014870	280.289038628103	0.752121765772497	0.30044346199036	2.5033720513999	0.0123016150904667	0.0775986547565534	341.234339879066	246.469344838388	359.256206292704	533.771684931848	546.638402347104	513.621158983613
FBgn0021872	3963.3423136289	-0.308492352932681	0.123331621152452	-2.50132407285353	0.0123729899118582	0.0779959730172591	5244.54589967443	6027.38366436153	5842.58258429541	4631.43340309687	4545.21953171095	4643.99131247684
FBgn0016650	147.356589815726	0.384554363076271	0.153840286287828	2.49969869632709	0.0124298973132473	0.0782885552464036	277.029969309486	210.707126175563	246.095994524666	295.299544325414	334.528157533926	326.645035318526
FBgn0262582	1185.46070297801	0.605754353321156	0.242356288927938	2.49943732015665	0.0124390701737969	0.0782885552464036	1627.6996909214	1057.4018166792	1489.75968114039	2003.16598109404	2193.82596063915	2154.73087091152
FBgn0015778	1011.11613611876	0.61642044664687	0.246639406706294	2.49927801432365	0.0124446638690239	0.0782885552464036	699.114257313208	398.217137542808	603.154915151971	856.470156050341	913.892140509349	834.634383348371
FBgn0026088	290.529840102661	-0.530209383948258	0.21228623744304	-2.49761543816765	0.0125031748712493	0.0786034617666503	380.470344116032	491.005596776084	342.776563802213	300.373419657466	273.925230444447	266.947839208588
FBgn0259174	1491.56269828438	0.320583456953467	0.128375562013434	2.49723118579157	0.0125167324627127	0.0786099504786793	1288.84329069306	1075.76619923579	1379.89539787045	1557.6797269399	1608.40168495478	1508.19897341899
FBgn0086604	437.024710835929	0.65922410496916	0.264006923839271	2.49699551580889	0.0125250540545571	0.0786099504786793	902.428097450213	514.202711584403	793.220125208967	1134.51852424678	1170.84855136874	1182.68030029121
FBgn0023416	337.278082499349	0.811802722959878	0.32512845348939	2.49686766644793	0.0125295705107983	0.0786099504786793	670.578981504506	391.451312390382	574.590201501786	918.371435101373	974.495067598828	978.808743764824
FBgn0266186	671.215602021548	-0.365771863878929	0.1465069671146	-2.49661754033047	0.0125384107338436	0.0786123688491422	639.665766045078	809.965925390469	650.396556958045	522.609159201334	568.455456099317	540.653851561698
FBgn0039508	572.606092844846	-0.479044916766178	0.192008792955771	-2.49491134958869	0.012598860198888	0.0789381415965366	535.03642141317	710.411641004767	655.889771121542	458.678330017481	472.702831297939	433.649443440112
FBgn0033766	537.041461948662	0.408687199984669	0.163859995789636	2.49412431640327	0.0126268312360315	0.0790601190792061	172.400624677577	136.283049498874	203.248924049389	199.91068808284	239.987591274338	238.78878443975
FBgn0259685	997.117808734505	0.46717156179352	0.187411334587138	2.49276044494687	0.0126754332122317	0.0793110215392534	1115.25369619012	888.256187868545	1084.36047587431	1341.53263779449	1495.68024056835	1430.47998225699
FBgn0261673	226.1732259667	-0.381011120938239	0.152886558154755	-2.49211654403634	0.012698436306991	0.0794015203647627	297.24245634065	359.555279528943	374.637205950496	276.018818063617	243.623766899707	272.579650162356
FBgn0029783	146.860881801941	-0.50228570101733	0.201646517480862	-2.49092177386599	0.0127412168851036	0.0796154802403855	171.211654852214	205.87439392383	166.993710570309	136.994633965398	119.993795637169	127.27892755515
FBgn0011274	600.321310520663	0.382518153856183	0.153642874195043	2.48965762883733	0.0127866203717903	0.0798455313746849	1049.86035579518	831.229947298094	1052.49983372603	1209.61187916115	1322.35586909244	1290.81107060355
FBgn0029936	212.321251702716	-0.373051560590347	0.149882138125668	-2.48896609866589	0.0128115181545926	0.0799473126183907	171.211654852214	173.011814612045	185.670638726199	153.231035027964	133.326439596855	121.647116601382
FBgn0035400	706.233501793871	0.441998321885201	0.177620852622083	2.48843711400048	0.0128305926153808	0.0800062724918247	1140.22206252273	831.229947298094	1018.44190591234	1269.48360807936	1410.83614264308	1379.79368367308
FBgn0030065	220.665450774075	0.519950115921648	0.208964099617158	2.48822700585529	0.0128381757967092	0.0800062724918247	338.856400228341	266.766820295667	366.9467061216	432.294178290812	452.097836087516	509.115710220599
FBgn0036770	416.120002877345	0.442766081893334	0.177965318559946	2.48793464634624	0.0128487341761832	0.0800164756694005	268.707180531947	208.77403327487	323.000992813624	375.466774571832	346.648742951822	363.814987613393
FBgn0086686	701.272262110728	0.560807983834584	0.225441953102147	2.48759370701727	0.0128610566891716	0.0800164756694005	828.711968277732	577.028230856933	730.597483745101	1051.30696880113	1100.54915594495	997.956901007634
FBgn0013751	26.0054927376244	0.750686814382444	0.301787618942304	2.48746723610938	0.0128656303641378	0.0800164756694005	48.7477628398666	25.1302077090122	32.959284980982	55.8126286525696	56.9667514641106	65.3290070637052
FBgn0042179	45.2809627164755	-1.54406613217422	0.620891296561906	-2.48685420575913	0.0128878203022599	0.0800997257469681	9.51175860290079	6.76582515242635	9.8877854942946	4.05910026564143	2.42411708357917	2.25272438150707
FBgn0011283	505.663143435179	-0.432771246543319	0.174039841837015	-2.48662169521276	0.0128962453692419	0.0800997257469681	1278.14256226479	1315.46971892175	1134.89804617848	967.08063828907	918.740374676507	876.309784406252
FBgn0032290	132.974697059692	-0.454835807178603	0.182962260013392	-2.48595424622166	0.0129204575967962	0.0801669815047261	102.251404981184	134.34995659818	102.173783441044	76.1081299807768	82.4199808416919	90.108975260283
FBgn0035020	672.151641299831	-0.395220248458338	0.158989747964985	-2.4858222213509	0.0129252516623754	0.0801669815047261	1091.47429968287	1256.51038545061	1038.21747690093	902.135034038807	832.684218209447	840.266194302139
FBgn0037292	110.251564102131	0.516349733144505	0.207768227318186	2.48521990012334	0.0129471430249828	0.0801669815047261	117.708012710897	92.7884592332756	83.4968552851544	120.758232902832	158.779668974436	140.795273844192
FBgn0034543	228.043532937239	-0.352623301445459	0.141891050657798	-2.48516942971893	0.0129489788601315	0.0801669815047261	266.329240881222	265.800273845321	284.548493669145	208.028888614123	209.686127729599	221.893351578447
FBgn0016694	1399.56016368479	0.717209997119321	0.288599861783597	2.48513631533584	0.0129501835039899	0.0801669815047261	2639.51301230497	1276.80786090789	1885.27110091217	3092.01962735236	3439.82214159885	3004.00796273968
FBgn0250814	2304.63719405152	-0.240900382888505	0.0970084600594732	-2.48329251635183	0.0130174143483222	0.0805128685051908	3273.23392922324	3137.40977782513	2621.36179882077	2530.84901562743	2506.53706442087	2605.27574721293
FBgn0033934	404.511659780958	-0.300972818692864	0.121207061174923	-2.48312941321551	0.0130233764499685	0.0805128685051908	329.34464162544	389.518219489688	332.888778307918	293.269994192593	281.197581695184	280.464185497631
FBgn0034389	376.222830248495	0.322806795320161	0.130070362718975	2.48178592395874	0.0130725785560455	0.0807396527216085	420.89531817836	361.488372429636	453.739489904852	493.180682275434	538.153992554577	513.621158983613
FBgn0040923	863.223583519164	-0.422386397893984	0.170208276575683	-2.48158553973825	0.0130799312240871	0.0807396527216085	1889.27305250117	2050.04502118518	1696.30453368787	1528.251250014	1412.04820118487	1264.90474021622
FBgn0033958	570.650343742785	0.729354875727269	0.293958014268827	2.48115322707367	0.0130958064657276	0.0807396527216085	1184.21394606115	660.151225586742	1014.04733458155	1546.51720120938	1671.42872912784	1519.46259532652
FBgn0036126	150.764851808208	-0.673712069617461	0.271545513203225	-2.48102817708225	0.0131004016860522	0.0807396527216085	143.865348868875	272.566098997747	193.361138555094	144.098059430271	127.266146887907	111.5098568846
FBgn0029924	234.275788678914	-1.53499545792452	0.618787939202351	-2.48064863691947	0.0131143574066025	0.0807396527216085	2.3779396507252	10.6320109538128	12.0850711596934	5.07387533205179	2.42411708357917	1.12636219075354
FBgn0004656	1151.07016518823	0.699591496272466	0.282022623421718	2.48062190112438	0.0131153409793127	0.0807396527216085	1725.19521660113	1045.80325927504	1578.74975058904	2257.87452276304	2419.26884941202	2385.63512001599
FBgn0051159	80.6966578116083	0.48584688942181	0.195877076074182	2.48036625397559	0.0131247491769253	0.0807396527216085	52.3146723159544	41.5614973649047	54.93214163497	62.9160541174421	72.7235125073752	72.0871802082264
FBgn0011760	1896.08684445798	0.267434910456809	0.107828984347898	2.48017647642826	0.0131317371337605	0.0807396527216085	1777.50988891709	1485.58189418276	1609.51174990462	2064.05248507867	1896.8716179007	1900.17301580122
FBgn0022942	634.129977053806	0.237606441609592	0.0958090214229984	2.48000071476104	0.0131382119345874	0.0807396527216085	430.407076781261	365.354558231023	401.004633935281	440.412378822095	479.975182548677	488.841190787035
FBgn0013995	1056.60823466047	0.613166954731182	0.247439034315863	2.47805265012657	0.0132101650317483	0.0811282129889006	1263.87492436044	917.252581378944	1171.15325965756	1610.44803039324	1732.03165621732	1784.1577101536
FBgn0264991	66.1372719748343	4.42689753518808	1.78688935131332	2.47743237819085	0.0132331482138242	0.0812157175525662	0	0	1.0986428326994	1.01477506641036	23.0291122940022	1.12636219075354
FBgn0033929	490.145817037398	-0.308002494183257	0.124346777867485	-2.47696401519541	0.0132505260718396	0.0812687278469421	278.218939134848	318.960328614385	306.521350323133	243.546015938486	231.503181481811	255.684217301053
FBgn0003916	11.2053934576717	-1.38403578982778	0.558915898932842	-2.47628631153698	0.0132757068959316	NA	16.6455775550764	32.8625793117851	10.986428326994	8.11820053128286	9.6964683343167	5.63181095376769
FBgn0003719	127.026627431794	-0.673001002149917	0.271787901764529	-2.47619926339838	0.0132789443290248	0.0813893370937857	218.770447866718	313.161049912305	252.687851520862	190.777712485147	170.900254392332	130.65801412741
FBgn0263930	670.483872329166	0.582764422430136	0.235387251609024	2.47576883814465	0.0132949626617119	0.0814338358554662	1015.38023085966	725.876384210313	1039.31611973363	1349.65083832577	1416.89643535203	1396.68911653439
FBgn0052039	202.018316003233	-0.470681541786226	0.19018479366827	-2.47486422393586	0.0133286836830658	0.0815866365274168	192.613111708741	271.599552547401	219.72856653988	153.231035027964	187.869073977386	154.311620133235
FBgn0065047	32.0592843250484	-1.01460612609395	0.410116268572736	-2.47394752133322	0.0133629324211429	0.0816989929762101	33.2911551101528	52.1935083187175	26.3674279847856	17.2511761289761	18.1808781268438	20.2745194335637
FBgn0014019	1346.06195260403	-0.302303642471036	0.122208000324228	-2.47368127838601	0.0133728940345518	0.0816989929762101	2839.25994296589	3011.75873928007	2738.91658191961	2311.65760128279	2439.87384462244	2215.55442921221
FBgn0023542	509.42649190081	-0.284796011571225	0.115131067399988	-2.47366777710649	0.013373399366508	0.0816989929762101	433.973986257349	404.982962695234	385.62363427749	337.920097114649	329.679923366768	336.782295035308
FBgn0035091	1242.36914717922	0.461659545763228	0.186732711302701	2.4723014116946	0.0134246276685013	0.0819581011567467	2140.14568565268	1590.93545727054	2080.82952513266	2610.00147080744	2483.50795212686	2908.26717652563
FBgn0051360	93.6082473226148	-0.679841167730019	0.275038881434092	-2.47180022033695	0.013443461956943	0.0819762134070215	86.7947972514697	153.680885605113	88.9900694486514	80.1672302464182	59.3908685476898	66.4553692544587
FBgn0035164	82.7933817366111	-0.561562681025436	0.227192045392664	-2.47175326959563	0.0134452275162086	0.0819762134070215	55.8815817920422	71.52443732565	45.0443561406754	49.7239782541075	46.0582245880043	21.4008816243172
FBgn0003139	338.827342654017	-0.264654179080204	0.107088664469276	-2.47135567888359	0.0134601869337274	0.0820136422737859	259.195421929047	273.532645448094	247.194637357365	233.398265274382	190.293191060965	224.146075959954
FBgn0033309	355.139625248037	-0.351658911119218	0.142324899181543	-2.47081791830858	0.0134804436652469	0.0820445515822914	238.982934897882	252.268623540468	230.714994866874	200.925463149251	189.081132519176	175.712501757552
FBgn0001341	378.480279289028	0.530678479056629	0.214818792508236	2.47035407312553	0.0134979377349837	0.0820445515822914	87.9837670768324	67.6582515242635	88.9900694486514	119.743457836422	115.145561470011	117.141667838368
FBgn0020270	316.435589112544	-0.420753500322194	0.170338951195342	-2.4700956379594	0.013507693399551	0.0820445515822914	159.321956598588	235.837333884576	173.585567566505	159.319685426426	138.174673764013	128.405289745903
FBgn0034091	685.141487066723	0.320808892174657	0.129884162182006	2.46996159335509	0.0135127559003116	0.0820445515822914	504.123205953742	502.604154180243	583.379344163382	646.411717303397	658.147788191746	681.44912540589
FBgn0023388	626.362339869491	0.651876519323777	0.263928577294274	2.46989744728154	0.0135151791163814	0.0820445515822914	920.262644830652	583.794056009359	936.043693459889	1178.15385210242	1381.74673764013	1272.7892755515
FBgn0030921	74.9009466380712	-0.586319840505067	0.237394002487462	-2.46981741055582	0.0135182031645591	0.0820445515822914	164.077835900039	233.904240983882	130.738497091229	136.994633965398	117.56967855359	97.9935105955578
FBgn0264503	302.308499072461	1.07846105410795	0.436753816565542	2.46926532340012	0.0135390791057158	0.0820590372044727	599.24079198275	260.000995143241	483.402846387736	983.317039351636	973.283009057039	877.436146597006
FBgn0035165	1115.7504078304	-0.27197319281382	0.11015673127044	-2.46896571527811	0.0135504200356907	0.0820590372044727	1097.41914880968	1200.4506913305	1127.20754634958	955.918112558556	1021.76535072862	860.540713735703
FBgn0029950	116.336780329543	-0.411438784030384	0.166653129616245	-2.46883322850168	0.0135554376731127	0.0820590372044727	252.061602976871	260.000995143241	247.194637357365	224.265289676689	168.476137308753	176.838863948305
FBgn0262512	636.309803602299	-0.353214993021555	0.143091688143518	-2.46845220434668	0.0135698772527138	0.0820590372044727	582.595214427674	706.54545520338	494.38927471473	500.284107740306	465.430480047202	431.396719058605
FBgn0011787	250.333512751951	-0.419827349269849	0.170079790924971	-2.46841407192846	0.0135713230954518	0.0820590372044727	143.865348868875	131.450317247141	113.160211768038	110.610482238729	83.6320393834815	94.6144240232971
FBgn0010339	547.468402132924	-0.305201595267433	0.123645718823907	-2.46835554170778	0.0135735426135168	0.0820590372044727	291.297607213837	312.194503461959	302.126778992335	268.915392598745	224.230830231074	238.78878443975
FBgn0263116	84.6874931188684	0.594891912170712	0.2411070483929	2.46733521950505	0.013612285695031	0.0822397871295638	150.99916782105	114.052481140901	165.895067737609	221.220964477458	231.503181481811	197.113383381869
FBgn0263852	189.13465639753	-0.400485221336385	0.162361501692294	-2.46662673824846	0.0136392451692176	0.0822867694271705	174.778564328302	179.777639764472	179.078781730002	139.024184098219	134.538498138644	130.65801412741
FBgn0285925	1832.70129551799	0.508078540551513	0.206008718079651	2.4662963067178	0.013651835031614	0.0822867694271705	3148.39209756016	2216.2910106448	2638.94008414396	3918.04653141039	3940.40231935795	3522.13457048631
FBgn0052365	82.4085347457377	0.823570704984956	0.33395915575253	2.46608212650782	0.0136600010528576	0.0822867694271705	42.8029137130536	28.9963935103986	31.8606421482826	46.6796530548764	64.2391027148481	72.0871802082264
FBgn0021814	336.749977819292	-0.392879067641886	0.159316073104488	-2.4660353471317	0.0136617851780838	0.0822867694271705	332.911551101528	365.354558231023	320.803707148225	273.989267930796	231.503181481811	270.326925780849
FBgn0266084	624.84892587851	0.474033367152837	0.19224385250595	2.4657920707148	0.0136710668506585	0.0822867694271705	608.752550585651	598.292252764559	697.638198764119	813.849603261106	932.073018636193	899.963390412076
FBgn0263121	19.9813832962454	-1.47524222075563	0.598296619955738	-2.46573718043863	0.0136731618374896	0.0822867694271705	9.51175860290079	17.3978361062392	3.2959284980982	4.05910026564143	2.42411708357917	4.50544876301415
FBgn0031194	499.024538581444	0.302501209900726	0.122710140608014	2.46516879861655	0.0136948718358589	0.0823641127618476	519.579813683456	427.213531053207	496.586560380129	593.643413850059	610.877505061952	573.318355093551
FBgn0037074	1052.481091644	0.264914130008368	0.107592321275237	2.46220294225903	0.0138086507895304	0.0829947220692008	1130.71030391983	1087.36475663995	1295.29989975259	1356.75426379065	1419.32055243561	1445.12269073679
FBgn0036805	634.853622476626	-0.390137276079729	0.158616483738387	-2.4596263067034	0.013908174850151	0.0835388951916692	644.421645346529	787.735357032496	633.916914467554	532.756909865437	572.091631724685	473.072120116486
FBgn0039710	301.551814175772	-0.343795544253013	0.139801125376571	-2.45917579938616	0.0139256408519955	0.0835898054498733	142.676379043512	187.510011367245	182.3747102281	143.08328436386	139.386732305803	122.773478792136
FBgn0010741	432.498806734565	-0.356679431278535	0.145093391629972	-2.45827482059393	0.0139606295628453	0.0837065764647703	231.849115945707	247.435891288735	219.72856653988	173.526536356171	179.384664184859	193.734296809608
FBgn0028990	623.296969643024	-0.351152366234116	0.142848732128691	-2.45821129107235	0.0139630996017271	0.0837065764647703	867.947972514697	1004.24176191014	882.210194657619	713.386871686481	763.59688132744	683.701849787397
FBgn0039602	189.44831552661	0.353410805765323	0.143812399099464	2.45744322449483	0.0139929927044488	0.083831730777039	141.487409218149	113.085934690555	168.092353403008	187.733387285916	183.020839810228	166.701604231524
FBgn0016715	343.829418257768	-0.374756732350784	0.152546220831658	-2.45667660796622	0.0140228856873826	0.083948038437615	535.03642141317	631.154832076344	561.406487509394	425.19075282594	436.341075044251	471.945757925732
FBgn0040832	119.705860808251	-0.447919248612738	0.182341722126053	-2.45648249555904	0.0140304637268287	0.083948038437615	174.778564328302	196.208929420364	166.993710570309	116.699132637191	135.750556680434	143.047998225699
FBgn0038071	106.63317811674	-0.505658485065693	0.205991355476298	-2.45475585078072	0.0140980301985957	0.0842980609559762	180.723413455115	218.439497778336	164.79642490491	121.773007969243	155.143493349067	121.647116601382
FBgn0263994	250.046495564703	1.08976021128527	0.444220633998574	2.45319583981497	0.014159322764493	0.0846101433574911	496.989387001567	196.208929420364	409.793776596876	740.785798479561	753.900412993123	851.529816209674
FBgn0028496	445.619657684929	0.639498560101811	0.260723397872411	2.45278546275605	0.0141754854223011	0.0846413084938157	889.349429371224	513.236165134056	864.631909334428	1144.66627491088	1224.17912720748	1161.2794186669
FBgn0027835	2997.98469452008	0.43106711181024	0.175759147816122	2.45260128514744	0.0141827445292928	0.0846413084938157	3449.2014633769	2784.62032344862	3505.76927914379	4185.94714894272	4407.04485794694	4536.98690435525
FBgn0002526	1109.10543569084	0.347548432215508	0.141754055084802	2.45177065310473	0.0142155235168264	0.0847825129310149	1336.40208370756	1246.84492094714	1248.05825794652	1563.76837733836	1648.39961683384	1662.51059355222
FBgn0262614	2012.47570481356	0.54380353542918	0.221841004340718	2.45132110290111	0.0142332918462897	0.0847855203096993	3052.08554170579	2146.69966621985	2876.24693600703	3731.32791919088	3906.46468018784	4132.62287787473
FBgn0010329	73.4850792346348	0.816306125529747	0.33300995128465	2.4512964924342	0.0142342651326565	0.0847855203096993	134.353590265974	71.52443732565	137.330354087425	203.969788348482	210.898186271388	188.102485855841
FBgn0038610	386.960832472669	-0.411490898712858	0.167920117405579	-2.45051578733107	0.0142651706836314	0.0848875064184934	697.925287487846	774.203706727644	624.029128973259	548.993310928003	562.395163390369	465.187584781211
FBgn0083975	246.501208377205	0.970095029654349	0.395934005971841	2.45014324362768	0.014279939318474	0.0848875064184934	455.375443113876	256.134809341855	410.892419429576	716.431196885712	782.989817996073	698.344558267193
FBgn0038533	332.126038202731	-0.416200725952005	0.169897875038797	-2.44971119183783	0.0142970839049285	0.0848875064184934	335.289490752253	428.180077503553	399.905991102582	292.255219126183	293.31816711308	287.222358642152
FBgn0042693	1391.16989786909	0.31901972000306	0.130235187101657	2.44956625857224	0.0143028391815591	0.0848875064184934	1586.08574703371	1217.84852743674	1510.63389496168	1735.26536356171	1792.6345833068	1851.73944159882
FBgn0032236	359.567323366968	-0.373541239604808	0.152503606118002	-2.44939283150966	0.014309728628109	0.0848875064184934	228.282206469619	258.067902242548	226.320423536076	209.043663680534	161.203786058015	179.091588329812
FBgn0033566	164.292653902875	-0.470510821459933	0.192119469345706	-2.44905330554126	0.0143232248837342	0.0848875064184934	78.4720084739316	94.7215521339689	71.411784125461	64.9456042502628	44.8461660462147	66.4553692544587
FBgn0030090	218.147793349451	0.696751982327055	0.284525840881713	2.44881793572035	0.0143325874909934	0.0848875064184934	155.755047122501	84.089541180156	123.047997262333	172.511761289761	202.413776478861	211.756091861665
FBgn0085284	56.1523798356388	-0.580256636529591	0.236953977265427	-2.44881577100353	0.0143326736247581	0.0848875064184934	54.6926119666796	83.1229947298094	50.5375703041724	37.5466774571832	43.6341075044251	46.180849820895
FBgn0035046	552.432620874152	-0.353725619436639	0.144448928966654	-2.44879364608025	0.0143335539983905	0.0848875064184934	520.768783508819	638.887203679117	519.658059866816	453.60445468543	408.463728583091	452.797600682922
FBgn0030208	334.388608641245	0.412319376556183	0.168412759462284	2.44826685265804	0.0143545297481592	0.0849576178220141	204.502809962367	150.781246254073	205.446209714788	232.383490207972	248.472001066865	263.568752636328
FBgn0040532	1983.55041960137	-0.653259908767625	0.267029062627624	-2.4464000372821	0.0144290803509567	0.0853326085094624	3676.29470002116	4813.40132272617	3730.99105984716	2743.95177957361	2593.80527942972	2432.94233202764
FBgn0260474	180.974282117528	0.328853142391223	0.134433122563502	2.44622111069305	0.0144362436207125	0.0853326085094624	286.541727912386	300.595946057799	284.548493669145	401.850926298501	344.224625868243	348.045916942843
FBgn0031725	61.8326468682837	0.62259043017568	0.254541949655994	2.44592465413694	0.0144481190687401	0.085333727665354	136.731529916699	80.2233553787696	118.653425931535	158.304910360016	170.900254392332	185.849761474334
FBgn0034494	658.234760414073	-0.215609148065737	0.0881563609801206	-2.44575826030701	0.0144547882418727	0.085333727665354	733.594382248724	748.106952568285	731.696126577801	662.648118365963	627.846324647006	614.993756151432
FBgn0004587	1134.82175258012	0.254925042603695	0.104294457154401	2.44428179175712	0.0145140850830568	0.0856294182120955	917.884705179927	770.337520926257	865.730552167127	1005.64209081266	1026.61358489578	1012.59960948743
FBgn0259227	602.706397685145	0.289744338442825	0.118600156609378	2.44303504081473	0.0145643230945838	0.0858303909225532	783.531114913953	650.485761083276	822.883481691851	843.278080187007	892.075086757136	1021.61050701346
FBgn0037015	59.1987338445291	0.672028162049068	0.275085600775102	2.44297833167389	0.0145666118386523	0.0858303909225532	87.9837670768324	88.9222734318892	108.765640437241	158.304910360016	168.476137308753	128.405289745903
FBgn0262608	2031.07796423623	-1.26034471853771	0.516050594241277	-2.44228905576735	0.0145944559276773	0.0859399944366961	52.3146723159544	38.6618580138649	119.752068764235	40.5910026564143	8.48440979252711	38.2963144856203
FBgn0004516	644.108916388644	0.68416467184744	0.280183483550774	2.4418451194089	0.0146124140780801	0.0859912823404994	1349.48075178655	732.642209362739	1114.02383235719	1791.07799221428	1679.91313892037	1662.51059355222
FBgn0031263	1237.23923004198	-0.608790042474022	0.24938373261999	-2.44117784298983	0.0146394434456974	0.0860958539899396	876.270761292236	1329.96791567695	860.23733800363	724.549397416995	660.571905275325	626.257378058967
FBgn0004198	632.232652591357	0.680898319581111	0.279154332235116	2.43914652561304	0.0147219975238984	0.0865266327289551	1161.62351937926	703.64581585234	1059.09169072222	1504.91142348656	1671.42872912784	1510.45169780049
FBgn0030460	170.325081302132	-0.419240442762069	0.171926467787185	-2.43848691919278	0.0147488924744869	0.0866299445532403	105.818314457271	134.34995659818	138.428996920124	100.462731574625	84.8440979252711	97.9935105955578
FBgn0030669	178.9267403477	-0.435955878463245	0.178811028069857	-2.43808160586676	0.0147654402886975	0.0866723887653469	199.746930660917	260.000995143241	188.966567224297	161.349235559247	146.65908355654	172.333415185291
FBgn0262871	560.009385845349	0.231423129605452	0.0949706983995585	2.43678453992003	0.0148185058964387	0.0869290017823895	721.704683995098	603.124985016292	658.087056786941	823.99735392521	741.779827575228	756.915392186377
FBgn0027948	1853.597964591	0.482844265860401	0.198205820126501	2.43607511400137	0.0148476009936051	0.0870447629498991	1546.84974279674	1155.98955461456	1591.93346458143	1958.51587817199	2047.16687708261	1994.78743982451
FBgn0016754	425.075684043554	0.494238064740716	0.202952751971253	2.43523706843218	0.0148820359069278	0.0871394053734022	677.712800456682	485.206318074004	603.154915151971	801.672302464182	835.108335293026	849.277091828167
FBgn0003415	1155.13288144661	0.668629026948139	0.274565484853304	2.43522607113337	0.014882488248329	0.0871394053734022	1278.14256226479	901.787838173398	1199.71797330775	1623.64010625657	1883.53897394102	1864.1294256971
FBgn0032633	488.015902128108	0.542425489846774	0.222806822543024	2.43451023472153	0.0149119581351802	0.0872570086475174	481.532779271853	281.265017050867	444.950347243257	563.200161857748	601.181036727635	592.466512336361
FBgn0024734	303.62480374391	0.422800936347554	0.173713571300753	2.43389697869691	0.0149372458230608	0.0873500073351064	338.856400228341	212.640219076257	264.772922680555	383.584975103115	384.222557747299	323.265948746265
FBgn0029175	248.963823287536	0.402965401567018	0.165601646341344	2.43334175999924	0.0149601729130216	0.0873693517466464	242.54984437397	219.406044228683	231.813637699573	316.609820720031	311.499045239924	288.348720832906
FBgn0052647	1291.39611146323	0.610804392919073	0.251034514041247	2.43314906419088	0.0149681372990786	0.0873693517466464	2371.99480159839	1545.50777410425	2079.73088229996	3126.52197961031	3022.87400322323	3007.38704931195
FBgn0266579	370.702579009692	0.330813269820951	0.135979433727798	2.43281841048971	0.0149818123810749	0.0873693517466464	645.610615171891	541.266012194108	688.849056102524	780.362026069565	815.715398624392	761.420840949391
FBgn0034893	155.318387790093	-0.452406827070066	0.185965985531668	-2.43273965277389	0.0149850712428698	0.0873693517466464	124.841831663073	137.24959594922	105.469711939142	80.1672302464182	105.449093135694	84.4771643065153
FBgn0004580	445.316217574635	0.673218551470483	0.276763117305142	2.43247206501231	0.0149961482399494	0.0873693517466464	866.759002689335	505.503793531283	786.628268212771	1158.87312584063	1066.61151677484	1215.34480382307
FBgn0039128	79.8020450543406	-1.80276535451956	0.741130568391102	-2.4324531080038	0.0149969332531348	0.0873693517466464	4.7558793014504	5.79927870207973	8.7891426615952	3.04432519923107	1.21205854178959	1.12636219075354
FBgn0263396	2509.4302674991	0.440092769700653	0.181032098524261	2.43102064931139	0.0150563564432454	0.0876027006088742	1890.46202232653	1357.03121628666	1700.69910501867	2212.20964477458	2461.69089837465	2037.58920307315
FBgn0024733	15578.1845138386	-0.373374116927625	0.153611936752727	-2.43063218146032	0.0150725070975378	0.0876027006088742	12298.7038735507	16526.0112080265	11808.2131658532	11230.5156599634	10178.867633949	9959.29449064278
FBgn0020647	712.179867072214	0.539751229711099	0.222080037384469	2.43043560361381	0.0150806856867857	0.0876027006088742	1023.7030196372	683.348340395061	939.339621957987	1220.77440489166	1327.2041032596	1297.56924374808
FBgn0005694	350.6112843425	0.439428860149791	0.18080504104378	2.4304015950716	0.0150821010031682	0.0876027006088742	231.849115945707	209.740579725217	246.095994524666	301.388194723876	317.559337948872	313.128689029483
FBgn0037263	36.5529630819883	-0.954414827290113	0.392706148569022	-2.4303536646113	0.0150840958996351	0.0876027006088742	16.6455775550764	22.2305683579723	14.2823568250922	14.206850929745	7.27235125073752	5.63181095376769
FBgn0000644	239.950734060014	-2.05285797478674	0.845118687386123	-2.42907653732761	0.0151373364201224	0.0878570249901984	7.1338189521756	1.93309290069324	9.8877854942946	1.01477506641036	1.21205854178959	2.25272438150707
FBgn0031432	720.361313961026	-0.461676691019381	0.19012496893878	-2.42828016538974	0.0151706190569682	0.0879952688656834	1317.37856650176	1451.75276842063	1267.83382893511	882.854307777011	911.46802342577	1137.62581266107
FBgn0038494	134.686942223706	0.604536969174218	0.249066785563692	2.42720829999881	0.0152155170734546	0.0882006719133299	248.494693500783	171.078721711352	255.98378001896	339.94964724747	315.135220865293	370.573160757914
FBgn0051814	110.665550076654	0.913023539534952	0.37626932549778	2.42651600240621	0.0152445780047462	0.0883140724536638	224.715296993531	104.387016637435	184.571995893499	304.432519923107	305.438752530976	355.930452278118
FBgn0039857	9952.73509273538	-0.31476294682397	0.129732260740477	-2.42625037926102	0.0152557411698052	0.0883237119532061	9642.54528369068	10362.3444941661	8306.83845804017	7696.05410365615	7492.94590534323	7573.65937062679
FBgn0000008	371.940782199947	0.567468162170714	0.234006764430259	2.42500751442951	0.0153080698924063	0.088571520758926	506.501145604467	364.388011780676	387.820919942888	529.712584666206	603.605153811215	731.009061799046
FBgn0261397	1526.27670065892	0.449125892616211	0.185269614950841	2.42417458866841	0.0153432271974183	0.0887197303990023	1397.03954480105	1213.01579518501	1639.17510638751	1836.74287020275	1975.65542311703	1988.02926667999
FBgn0030276	1278.56551301681	0.228287651586375	0.094227263488865	2.42273460072787	0.015404175926264	0.0889297541290472	1146.16691164955	1064.16764183163	1262.34061477161	1362.84291418911	1391.44320597445	1312.21195222787
FBgn0011826	475.0036380584	0.511867593017706	0.211286144371447	2.42262735467324	0.0154087237229018	0.0889297541290472	615.886369537826	384.685487237955	532.841773859209	756.007424475716	747.840120284175	680.322763215137
FBgn0032707	28.7334971791682	0.665285535851095	0.274617564459237	2.42258916381092	0.015410343501609	0.0889297541290472	41.613943887691	35.762218662825	52.7348559695712	63.9308291838525	63.0270441730585	78.8453533527476
FBgn0025373	215.85398066526	0.347196916653629	0.143326873104381	2.42241325114778	0.015417806372986	0.0889297541290472	128.408741139161	107.286655988475	119.752068764235	132.935533699757	163.627903141594	155.437982323988
FBgn0032382	1804.82271706208	-0.349656399120326	0.144385544907467	-2.42168562887935	0.0154487086249787	0.0889520755372066	3136.50239930654	3460.2362922409	2920.19264931501	2443.57835991614	2468.96324962539	2556.84217301053
FBgn0030006	93.0894901327432	-0.47823636226808	0.197483565229567	-2.42165145090503	0.0154501615093465	0.0889520755372066	101.062435155821	112.119388240208	96.6805692775472	79.1524551800078	63.0270441730585	79.9717155435012
FBgn0053002	151.371614732615	-0.478389687737583	0.197547292469305	-2.42164639037974	0.0154503766393406	0.0889520755372066	110.574193758722	148.84815335338	113.160211768038	93.3593061097529	79.9958637581128	94.6144240232971
FBgn0287775	663.046648838314	0.305626897604069	0.126230541043583	2.42118028709507	0.0154702026483765	0.0890111040993839	1143.78897199882	947.215521339689	1019.54054874504	1198.44935343063	1322.35586909244	1322.34921194465
FBgn0050044	35.8903908799585	0.70699233319792	0.292063090106838	2.42068360277671	0.0154913540802963	0.0890776810380922	87.9837670768324	53.1600547690642	47.2416418060742	102.492281707446	109.085268761063	94.6144240232971
FBgn0023529	1570.699059611	0.322666191430541	0.133337478135143	2.41992121002548	0.0155238702904926	0.0891713054998311	1681.20333306272	1472.0502438779	1796.28103146352	2113.77646333277	2145.34361896757	1929.45843276081
FBgn0039862	198.301087642686	0.958131851789616	0.395946436378319	2.41985219150739	0.0155268169073163	0.0891713054998311	376.903434639944	166.245989459619	347.171135133011	536.816010131079	636.330734439533	555.296560041494
FBgn0040660	994.784305885108	-0.309575587667071	0.128018378607851	-2.41821206481118	0.0155969840216326	0.0894989312292582	819.200209674831	938.516603286569	863.533266501729	734.697148081098	701.781895696171	679.196401024383
FBgn0036621	797.201297187508	0.398015764089677	0.164600660794569	2.41806905372283	0.0156031154573701	0.0894989312292582	720.515714169735	560.59694120104	732.7947694105	805.731402729823	951.465955304826	895.457941649062
FBgn0035538	218.054768070193	0.754115811063956	0.311925234563682	2.41761719637338	0.0156225022594886	0.0895548865651817	458.942352589963	256.134809341855	388.919562775588	590.599088650828	646.02720277385	624.00465367746
FBgn0033558	62.0311859822567	0.441966584299198	0.182877188258925	2.41673982691294	0.0156602060640213	0.0897157091702221	110.574193758722	119.851759842981	93.384640779449	158.304910360016	147.87114209833	134.037100699671
FBgn0003093	564.00465398929	0.478660284040949	0.198104537868315	2.41620050298457	0.0156834225132896	0.0897933882565069	1028.45889893865	597.325706314212	826.179410189949	1179.16862716883	1144.18326344937	1090.31860064942
FBgn0034742	278.712921863294	0.472313380810129	0.195518238393903	2.41569985843765	0.0157050010127184	0.0898212599869643	324.58876232399	276.432284799134	363.650777623502	417.072552294657	450.885777545727	469.693033544225
FBgn0024277	1425.88752571434	0.605449232678266	0.250678787330507	2.41523919564847	0.0157248793084659	0.0898212599869643	2052.16191857585	1344.46611243215	1964.37338486653	2564.33659281897	2733.19201173552	2857.58087794172
FBgn0032741	106.972672742245	-0.350324515822567	0.145048183269024	-2.41522856699841	0.0157253382118824	0.0898212599869643	238.982934897882	227.138415831456	206.544852547487	188.748162352326	180.596722726649	157.690706705495
FBgn0039402	398.009052870105	-0.467154357578776	0.19342330673202	-2.4151916616026	0.0157269317335747	0.0898212599869643	355.501977783417	459.109563914645	381.229062946692	306.462070055928	294.53022565487	264.695114827081
FBgn0053158	369.348888118485	0.318687833269373	0.131984484764673	2.41458557676375	0.0157531219304099	0.0898907685431107	299.620395991375	307.361771210226	354.861634961906	360.245148575677	419.372255459197	421.259459341823
FBgn0037378	546.420777759797	-0.366859574342017	0.151950702416978	-2.41433286261023	0.0157640535669527	0.0898907685431107	303.187305467463	323.793060866118	270.266136844052	248.619891270537	219.382596063915	227.525162532215
FBgn0266886	52.7245437848267	0.93022888311752	0.385309322292116	2.41423923403619	0.0157681053445702	0.0898907685431107	118.89698253626	44.4611367159446	76.904998288958	171.49698622335	151.507317723698	132.910738508917
FBgn0020443	1497.87326770783	0.290403709387456	0.120325057301323	2.41349321496864	0.0158004220678221	0.09000175783943	995.167743828496	955.914439392808	1089.85369003781	1239.04035608705	1262.96500054475	1216.47116601382
FBgn0025836	1151.61228778321	0.444392282821266	0.184150879167979	2.41319663978307	0.0158132855512992	0.09000175783943	1089.09636003214	811.899018291162	1047.00661956253	1330.37011206398	1300.53881534023	1378.66732148233
FBgn0052726	275.01430417824	-0.334604173937133	0.138660398715678	-2.41311994654822	0.0158166134985619	0.09000175783943	613.508429887101	626.322099824611	506.474345874424	506.372758138768	452.097836087516	425.764908104837
FBgn0030545	114.267384495998	-0.46659837504717	0.193424341474956	-2.41230432265725	0.0158520439687447	0.0901481986675155	86.7947972514697	121.784852743674	101.075140608345	76.1081299807768	61.814985631269	86.7298886880224
FBgn0036641	297.48141259533	-0.437941609532141	0.181569748786327	-2.41197453022593	0.0158663898635282	0.0901746289432063	85.6058274261072	129.517224346447	101.075140608345	73.0638047815457	83.6320393834815	78.8453533527476
FBgn0250843	1263.82691014581	-0.427441582555303	0.177254181797214	-2.41146120346156	0.0158887421758565	0.0902305839088694	671.767951329869	830.263400847748	667.974842281235	572.333137455441	540.578109638156	501.231174885324
FBgn0261671	2077.66212018363	0.448227912638921	0.185886196652848	2.41130283318459	0.0158956438419798	0.0902305839088694	2742.95338711152	2253.01977575797	3255.27871328832	3370.0679955488	3856.77027997447	4030.12391851616
FBgn0004839	37.4827700074808	0.583810857408184	0.242199552881749	2.41045390241997	0.0159326846110706	0.0903033460550626	54.6926119666796	33.8291257621317	42.8470704752766	57.8421787853904	69.0873368820065	68.7080936359658
FBgn0031213	913.1892588531	0.263558392916506	0.109341238465286	2.41042077642262	0.0159341315105201	0.0903033460550626	1011.81332138357	938.516603286569	998.666334923755	1195.4050282314	1132.06267803147	1210.83935506005
FBgn0024836	187.083368704659	0.979228505852237	0.406280194395632	2.41022949028786	0.0159424888942339	0.0903033460550626	397.115921671108	152.714339154766	317.507778650127	529.712584666206	629.058383188796	549.664749087726
FBgn0051935	281.932346787711	0.308005026202705	0.127814337611863	2.40978462946803	0.0159619399848539	0.0903033460550626	318.643913197177	247.435891288735	325.198278479023	356.186048310035	366.041679620455	378.457696093189
FBgn0041205	668.62437413211	-0.507991882093644	0.210811774809871	-2.40969406263856	0.0159659024835748	0.0903033460550626	539.79230071462	849.59432985468	619.634557642462	502.313657873127	498.15606067552	413.374924006548
FBgn0010612	1615.62691748151	-0.382147776543166	0.158588925981536	-2.40967503990574	0.0159667348800304	0.0903033460550626	1726.38418642649	2169.89678102816	1534.80403728106	1521.14782454913	1350.2332155536	1296.44288155732
FBgn0259243	1008.01372800912	0.402727104395387	0.167163784499074	2.40917675800537	0.0159885522861631	0.0903717684843434	1300.73298894668	1010.04104061222	1241.46640095032	1632.77308185426	1557.49522619962	1503.69352465597
FBgn0015777	1539.27195588513	-0.306290930648239	0.127177536735642	-2.40837288179996	0.0160238054751931	0.0905160044400641	2854.7165506956	3341.35107884827	3111.3565022047	2551.14451695564	2627.74291859983	2349.59152991188
FBgn0037603	133.922585292328	-0.388852991701086	0.161540462124757	-2.40715537510829	0.0160773281421547	0.0906751246484835	142.676379043512	148.84815335338	139.527639752824	111.625257305139	123.629971262538	94.6144240232971
FBgn0004045	266807.998766188	0.392447353473993	0.163035440663215	2.40712909952308	0.0160784849703681	0.0906751246484835	416554.389345961	333219.788396349	416432.875234879	492380.024748036	474102.758913706	564299.573032187
FBgn0029167	3031.01237659161	0.622382642284639	0.258564762692678	2.40706674723649	0.0160812304307754	0.0906751246484835	5162.50698172441	4304.0313433935	4405.5577591246	7186.63702031815	6788.73989256348	7378.79871162642
FBgn0033734	438.565688263565	-0.379273594419469	0.157618536273111	-2.40627532387617	0.0161161137613783	0.0908167428807852	359.068887259505	464.908842616725	346.072492300311	298.343869524645	284.833757320553	317.634137792498
FBgn0051092	1225.91218451203	0.315167489184495	0.130995748110064	2.40593678597635	0.0161310556942444	0.0908458848243998	1068.88387300098	916.286034928597	983.285335265963	1207.58232902832	1302.96293242381	1181.55393810046
FBgn0003423	1320.92820373729	0.359433935470333	0.149416112074535	2.40559020362565	0.0161463652949639	0.0908770608429626	1615.80999266777	1173.3873907208	1476.57596714799	1820.50646914018	1831.42045664407	1817.94857587621
FBgn0051908	461.938633415564	-0.254886470677087	0.105999234476741	-2.40460671188164	0.0161898786884843	0.0910151864664079	520.768783508819	490.039050325737	479.008275056939	409.969126829784	415.736079833829	422.385821532577
FBgn0260655	462.541485184566	0.248472186487199	0.103334331381096	2.40454632227536	0.0161925539082798	0.0910151864664079	409.005619924734	385.652033688302	438.358490247061	453.60445468543	487.247533799414	523.758418700395
FBgn0275436	265.416658999425	-0.286210354085085	0.119056636136387	-2.40398488797561	0.0162174436793589	0.0910151864664079	277.029969309486	330.558886018544	288.943064999942	234.413040340792	250.896118150445	252.305130728792
FBgn0045035	445.183424259569	0.452343736816531	0.188167076142571	2.4039473115573	0.0162191107347382	0.0910151864664079	288.919667563112	233.904240983882	339.480635304115	368.36334910696	372.101972329403	438.154892203126
FBgn0014163	972.118311295628	0.279581946847007	0.116306894165267	2.40382953094537	0.0162243369771524	0.0910151864664079	1073.63975230243	1035.17124832123	1089.85369003781	1356.75426379065	1352.65733263718	1172.54304057443
FBgn0034433	273.227957513017	0.431050064178863	0.179326977295313	2.40371008690464	0.0162296385417621	0.0910151864664079	323.399792498627	258.067902242548	302.126778992335	402.865701364912	409.675787124881	377.331333902435
FBgn0034512	5376.32598697985	-0.5393402526482	0.22441431917305	-2.40332370338768	0.0162467987355656	0.0910259783091582	7976.79855835768	10839.8184406374	10288.7901282299	6867.9976494653	6694.19932630389	6465.31897492531
FBgn0013810	49.8627347284409	0.752285434909122	0.313054230864189	2.40305148674219	0.016258898083889	0.0910259783091582	24.9683663326146	26.0967541593588	29.6633564828838	41.6057777228246	48.4823416715835	46.180849820895
FBgn0025833	120.805113818126	0.800169551215043	0.332986950422757	2.40300573400596	0.0162609324555293	0.0910259783091582	278.218939134848	121.784852743674	203.248924049389	336.905322048239	381.79844066372	330.024121890786
FBgn0012034	8005.40744810052	0.379602396625355	0.158005453957424	2.4024638841115	0.0162850425458891	0.0910887099245836	13346.1862896952	11000.2651513949	12035.6322322219	15331.2217033277	14218.6587537337	17780.7535432353
FBgn0250754	922.485583696362	0.707415165541216	0.294472439054739	2.40231366919101	0.0162917320503961	0.0910887099245836	385.226223417482	275.465738348787	357.058920627305	488.106806943382	597.544861102267	575.571079475058
FBgn0031277	65.6550848947301	3.90908825094688	1.62823996496954	2.40080598379122	0.0163590074882332	0.0914098867942263	1.1889698253626	0	2.1972856653988	4.05910026564143	46.0582245880043	0
FBgn0085380	171.249452818712	0.745529935458569	0.310652689740315	2.3998824413263	0.0164003379345931	0.0915180129536049	340.045370053703	192.342743618978	331.790135475219	482.01815654492	463.006362963622	502.357537076078
FBgn0043458	735.271022254779	0.260121600547972	0.108393760919542	2.39978388369652	0.0164047540060771	0.0915180129536049	720.515714169735	649.519214632929	704.230055760316	818.923478593158	809.655105915444	853.782540591181
FBgn0263106	1242.03612883147	0.224802404869137	0.0936919379150076	2.39937832295737	0.0164229369606784	0.0915180129536049	1061.7500540488	1094.13058179238	1110.72790385909	1183.22772743448	1410.83614264308	1226.6084257306
FBgn0037901	290.469711860255	-0.357342900187668	0.148934067333397	-2.39933620685814	0.0164248262128561	0.0915180129536049	183.10135310584	270.633006097054	230.714994866874	154.245810094374	203.625835020651	180.217950520566
FBgn0086129	468.782786958323	0.332205483656212	0.138477796310508	2.39898014343982	0.0164408062066841	0.0915180129536049	279.407908960211	260.000995143241	342.776563802213	383.584975103115	329.679923366768	395.353128954492
FBgn0041186	347.635595241564	-0.414069552629865	0.172608748266403	-2.39889088350721	0.0164448142996327	0.0915180129536049	101.062435155821	110.186295339515	104.371069106443	70.0194795823146	79.9958637581128	87.8562508787759
FBgn0050197	1422.51463272147	-0.52337279929234	0.21822449248743	-2.39832290741832	0.0164703385887337	0.0915180129536049	2713.22914147745	3571.38913403077	2838.89307969525	2156.39701612201	1965.95895478271	2225.69168892899
FBgn0035923	174.705993670016	0.476082301450893	0.198508417832082	2.39829779840173	0.0164714677661093	0.0915180129536049	105.818314457271	80.2233553787696	93.384640779449	120.758232902832	122.417912720748	144.174360416453
FBgn0052528	527.496510731889	-0.236037556076985	0.0984205117840334	-2.39825572737244	0.016473359894438	0.0915180129536049	527.902602460994	511.303072233363	470.219132395343	433.308953357222	424.220489626356	423.51218372333
FBgn0031974	107.150709251045	-0.481923807297865	0.200954012873138	-2.39817956560092	0.0164767857264288	0.0915180129536049	103.440374806546	121.784852743674	96.6805692775472	67.9899294494939	87.2682150088503	76.5926289712405
FBgn0028507	214.746519726869	-0.313718885144507	0.130919491160895	-2.39627333075224	0.0165627341453395	0.091940478855741	223.526327168169	204.907847473484	219.72856653988	172.511761289761	152.719376265488	194.860659000362
FBgn0266409	175.54792759288	0.422412531777034	0.176335300431609	2.39550748343134	0.0165973754300919	0.0920645826719563	224.715296993531	130.483770796794	190.065210056996	259.782417001051	212.110244813178	254.557855110299
FBgn0015754	1646.68907511145	0.246603787739407	0.102951413479158	2.39534144705386	0.01660489407839	0.0920645826719563	1693.09303131634	1458.51859357305	1689.71267669168	1919.9544256484	1936.86954977976	1884.40394513067
FBgn0020440	581.835660852935	0.350434031768774	0.146352550707074	2.3944511392232	0.0166452610516224	0.0921791480523862	543.359210190708	458.143017464299	500.981131710927	623.071890775959	624.210149021638	666.806416926094
FBgn0035720	2104.76717935145	0.606086451248024	0.253125119279408	2.39441448155529	0.0166469249729003	0.0921791480523862	3489.62643743923	2155.39858427297	2946.56007729979	4269.15870438837	4455.52719961852	4351.13714288092
FBgn0015721	50.6574102008154	0.499760697569459	0.208740334925666	2.39417407156805	0.0166578409975768	0.0921791480523862	101.062435155821	71.52443732565	86.7927837832526	123.802558102064	134.538498138644	107.004408121586
FBgn0026879	495.121578798662	-0.424899500371287	0.177486177641396	-2.393986427663	0.0166663654993472	0.0921791480523862	382.848283766757	449.444099411179	379.031777281293	300.373419657466	303.014635447397	299.612342740441
FBgn0011771	557.553721731598	0.247007932416108	0.103186810192052	2.39379366370931	0.0166751265889561	0.0921791480523862	482.721749097215	397.250591092461	439.45713307976	484.04770667774	538.153992554577	541.780213752452
FBgn0085413	565.792426912709	0.985217913139868	0.411684657771432	2.39313730677538	0.0167049882364725	0.0922157008957198	1206.80437274304	433.012809755286	911.873551140502	1570.87180280323	1762.33311976206	1716.57597870839
FBgn0261608	6348.8142007966	-0.399669219713794	0.167013617921691	-2.39303372196386	0.0167097052233487	0.0922157008957198	6169.56442380653	6963.00062829706	4794.47732190018	4822.21111558202	4344.01781377388	4423.22432308914
FBgn0039969	433.063575880628	-0.374496708604203	0.156497104880627	-2.3929944831239	0.0167114923649481	0.0922157008957198	495.800417176204	656.285039785356	502.079774543626	445.486254154147	401.191377332353	430.270356867851
FBgn0039172	487.502948642201	-0.306712161097027	0.128231333757123	-2.39186595124991	0.0167629634691318	0.092419974220168	486.288658573303	515.169258034749	426.273419087367	393.732725767219	373.314030871193	387.468593619217
FBgn0036330	73.9396486388812	-1.79794761118206	0.751729806846323	-2.39174713415297	0.0167683906764276	0.092419974220168	5.944849126813	8.69891805311959	4.3945713307976	1.01477506641036	1.21205854178959	3.37908657226061
FBgn0001994	746.949738208819	0.657386915623169	0.274956260329688	2.39087815216473	0.0168081300754872	0.0925841193376064	915.506765529201	683.348340395061	1032.72426273744	1350.66561339219	1450.83407452214	1348.25554233198
FBgn0031294	5875.39637732352	0.909110142217874	0.38029688909418	2.390527422886	0.0168241926725036	0.0926177285192057	13192.8091822234	4615.25930040512	10924.9043283628	17561.6972992976	18986.8970571339	17406.8012959052
FBgn0041588	267.024451285481	-0.354540932477848	0.148459447803643	-2.38813317524106	0.0169342041232248	0.0931681833951147	233.038085771069	304.462131859186	272.463422509451	218.176639278227	225.442888772863	191.481572428101
FBgn0263132	28.9452354257633	0.649133672409138	0.27187166755676	2.38764737143349	0.016956602837731	0.0932008455803014	45.1808533637788	27.0633006097054	48.3402846387736	53.7830785197489	66.6632197984273	67.5817314452123
FBgn0267002	2522.00971228881	0.659491485387427	0.27621874103558	2.3875696591582	0.0169601882901559	0.0932008455803014	4672.65141367502	2862.91058592669	4456.09532942877	6075.45832259881	6532.99554024588	6331.28187422563
FBgn0038474	206.605773318853	-0.394533722577953	0.165306067144292	-2.3866862807496	0.0170009919788001	0.0933342122872639	149.810197995688	169.145628810659	147.21813958172	124.817333168474	115.145561470011	114.888943456861
FBgn0263987	1626.62829622244	0.559067992252298	0.234251957824744	2.38660968917308	0.0170045338368063	0.0933342122872639	973.766286971969	735.541848713779	995.370406425657	1308.04506060295	1346.59703992823	1329.10738508917
FBgn0032973	52.6563075810646	-0.492571547967141	0.206457656291817	-2.38582359605457	0.0170409229300022	0.0934787618897704	127.219771313798	89.8888198822358	119.752068764235	73.0638047815457	82.4199808416919	83.3508021157618
FBgn0002773	2365.42256161073	-0.377199664456306	0.158148819267156	-2.38509314330771	0.017074797597987	0.0936093561710397	3644.19251473637	4445.14712514411	3333.28235440998	3269.60526397417	2695.61819694004	2829.42182317289
FBgn0038924	694.519450365095	-0.272073859817128	0.114132884805919	-2.38383407446315	0.0171333254837456	0.0938748735108231	756.184808930613	895.022013020971	698.736841596819	676.854969295708	597.544861102267	672.438227879862
FBgn0022984	249.292535892481	0.299229759526875	0.125573939698524	2.382896962899	0.0171770013443781	0.0940339162904337	240.171904723245	208.77403327487	228.517709201475	261.811967133872	284.833757320553	286.095996451399
FBgn0031318	438.151984741925	0.352789688198875	0.148058179447126	2.3827774292258	0.0171825794555223	0.0940339162904337	589.729033379849	462.009203265685	548.222773517001	689.032270092632	689.661310278275	662.30096816308
FBgn0032987	12069.1553112697	-0.456712211949562	0.191690970690112	-2.38254420803097	0.0171934674385539	0.0940381530845142	10600.8549629329	13847.710994116	10997.414755321	8949.30131067294	8512.28713898827	8366.61835291728
FBgn0031782	127.164585818002	-0.530687750537275	0.222772028659998	-2.38220100489917	0.0172095009587842	0.094070511413742	73.7161291724812	70.5578908753034	59.3267129657676	34.5023522579521	55.754692922321	51.8126607746627
FBgn0038723	341.517636273845	-0.343578575413953	0.144300600511405	-2.38099200000763	0.0172660869176691	0.0943243690719668	225.904266818894	234.870787434229	226.320423536076	158.304910360016	204.83789356244	180.217950520566
FBgn0032292	381.840177331565	-0.303024739505528	0.127319784602303	-2.38002868487454	0.0173112904250994	0.0945157829551226	330.533611450803	341.190896972357	281.252565171047	275.004042997207	265.44082065192	232.030611295229
FBgn0086768	331.497701102121	-0.422624778478647	0.177594338431951	-2.37971988414814	0.0173258028334432	0.0945395039585417	395.926951845746	483.273225173311	346.072492300311	295.299544325414	309.074928156345	310.875964647976
FBgn0025693	302.506489065484	0.296196397471474	0.124500570394361	2.37907663019742	0.0173560674811065	0.0946490999644154	338.856400228341	358.588733078596	401.004633935281	422.146427626709	478.763124006887	449.418514110661
FBgn0033961	415.798117452488	-0.455384918535906	0.191555227821236	-2.37730352606655	0.0174397309366013	0.0950496003801398	455.375443113876	537.399826392721	420.78020492387	328.787121516956	334.528157533926	368.320436376407
FBgn0261436	303.834454875789	0.377363958797015	0.158761624336436	2.37692175533133	0.0174577908848264	0.0950922903615205	296.053486515287	298.662853157106	325.198278479023	400.836151232091	378.162265038351	415.627648388055
FBgn0033085	71.5702269004443	-0.539211167963123	0.226886895112767	-2.3765637398102	0.0174747419719471	0.0951185896988509	61.8264309188552	79.2568089284229	57.1294273003688	41.6057777228246	50.9064587551627	45.0544876301415
FBgn0013678	22992.2058414426	-0.88066202829764	0.37060691086335	-2.37626984949117	0.0174886676838188	0.0951185896988509	26246.5088948794	58894.5748589707	38332.7470757148	20978.4449479013	21060.7292221359	25022.1360675898
FBgn0262976	180.033814836598	-0.48267755888714	0.203135636502028	-2.37613432679165	0.0174950925745223	0.0951185896988509	149.810197995688	237.770426785269	180.177424562702	172.511761289761	121.205854178959	112.636219075354
FBgn0037831	166.05815440383	0.464406849735608	0.195469158323275	2.3758574177086	0.0175082267769744	0.0951185896988509	172.400624677577	139.182688849913	196.657067053193	211.073213813354	229.079064398232	260.189666064067
FBgn0034180	585.740975894388	0.309838559712424	0.130417671364927	2.37574062218496	0.0175137691508316	0.0951185896988509	694.358378011758	649.519214632929	798.713339372464	891.987283374704	912.680081967559	850.403454018921
FBgn0016919	15.9981595221635	0.927120733747613	0.390315593653025	2.37531051493624	0.0175341925735138	NA	26.1573361579772	16.4312896558926	31.8606421482826	48.7092031876971	41.209990420846	50.6862985839092
FBgn0025621	708.778647709392	-0.472967459618013	0.199212274579048	-2.37418834064031	0.0175875767769488	0.0954133689401775	884.593550069774	1273.90822155685	1007.45547758535	751.948324210075	807.230988831865	723.124526463771
FBgn0040505	368.80998542744	0.87146600254296	0.367061716619296	2.37416751212662	0.0175885689786475	0.0954133689401775	750.2399598038	348.92326857513	636.114200132953	1012.74551627754	1134.48679511505	1026.11595577647
FBgn0262117	1099.10685554011	0.413981573510664	0.174425717800379	2.37339756276332	0.0176252812748389	0.0955567727658612	885.782519895136	693.013804898527	896.492551482711	1133.50374918037	1099.33709740316	1063.28590807134
FBgn0033205	508.039073800379	-0.638045496803012	0.269034335659903	-2.3716136278218	0.0177106000643619	0.0959633796028186	470.832050843589	762.605149323484	527.348559695712	384.599750169525	376.950206496562	370.573160757914
FBgn0000416	11149.8240559931	0.301532564522041	0.127191401789443	2.3706992790378	0.0177544700086597	0.0961450565757236	13153.5731779864	12124.358673148	14721.813958172	15782.7966078803	15902.2080682794	17611.7992146223
FBgn0039911	434.686273722365	0.569748068109471	0.240385843318851	2.37013985617177	0.0177813577346681	0.0962346124662072	916.695735354564	546.098744445841	770.14862572228	1094.94229665678	1141.75914636579	1075.67589216963
FBgn0036008	179.677163669278	0.567552841287267	0.239537739323207	2.36936711054733	0.0178185571444445	0.0963798396329524	21.4014568565268	29.9629399607453	32.959284980982	35.5171273243625	44.8461660462147	46.180849820895
FBgn0031562	58.7609071690787	-0.601192957307564	0.253828632492156	-2.36849937457762	0.0178604105816122	0.0965500567371108	90.3617067275575	101.487377286395	71.411784125461	64.9456042502628	52.1185172969523	56.3181095376769
FBgn0015396	693.79401560064	0.555034665240934	0.23437550290019	2.36814282368622	0.0178776330225653	0.0965663067406434	142.676379043512	97.6211914850088	157.105925076014	203.969788348482	186.657015435596	191.481572428101
FBgn0029121	141.186169341868	-0.494454258781116	0.208806062531569	-2.36800719666059	0.0178841880197234	0.0965663067406434	82.0389179500194	101.487377286395	73.6090697908598	53.7830785197489	77.5717466745336	52.9390229654163
FBgn0034877	1489.9633900151	-0.331490316243585	0.140029032494757	-2.36729705503032	0.0179185443015509	0.0966956615878236	1701.41582009388	1887.66521752695	1523.81760895407	1396.33049138065	1273.87352742086	1393.31002996213
FBgn0015399	192.408115616612	0.822397203300113	0.347581903910874	2.36605299081103	0.0179788708637291	0.0969463358890971	321.021852847902	173.011814612045	292.23899349804	439.397603755685	498.15606067552	451.671238492169
FBgn0030272	745.359801222847	-0.393097646969019	0.166150767151076	-2.36590931061779	0.0179858495814898	0.0969463358890971	1325.7013552793	1701.12175261005	1283.2148285929	1133.50374918037	1089.64062906884	1059.90682149908
FBgn0028897	69.5306261835387	-0.732602387269021	0.3098149751999	-2.36464485551845	0.0180473680647479	0.0971689882287751	24.9683663326146	32.8625793117851	34.0579278136814	20.2955013282071	20.604995210423	14.642708479796
FBgn0025595	370.701610362882	0.31948373849931	0.135118009791974	2.36447930953973	0.0180554358637342	0.0971689882287751	638.476796219716	562.530034101734	642.706057129149	825.01212899162	752.688354451334	720.871802082264
FBgn0039727	450.316235465898	0.494258218504505	0.209049276722421	2.36431441549922	0.0180634750308051	0.0971689882287751	349.557128656604	333.458525369584	439.45713307976	468.826080681585	534.517816929208	577.823803856565
FBgn0024361	242.909655045613	-1.10807701765973	0.468753051235317	-2.36388225045061	0.0180845594805806	0.0971689882287751	13.0786680789886	17.3978361062392	9.8877854942946	5.07387533205179	4.84823416715835	9.0108975260283
FBgn0034053	80.6881010739218	0.616308426670397	0.260726402875844	2.36381287001408	0.0180879464174606	0.0971689882287751	79.6609782992942	60.8924263718371	73.6090697908598	110.610482238729	100.600858968536	116.015305647614
FBgn0051547	218.652213960132	0.37564936572695	0.158919345656945	2.36377367509337	0.0180898600369982	0.0971689882287751	381.659313941394	297.696306706759	317.507778650127	420.116877493888	443.613426294989	428.017632486344
FBgn0036740	648.100287467329	-0.411817259601065	0.174244380233075	-2.36344643683891	0.0181058437606387	0.0971887837511487	701.492196963934	785.802264131803	715.21648408731	588.569538518007	547.850460888894	519.252969937381
FBgn0086361	753.777158300421	0.25590708873508	0.108285152744591	2.36327033068588	0.0181144506604367	0.0971887837511487	787.098024390041	761.638602873138	845.954981178538	949.829462160094	934.497135719772	974.30329500181
FBgn0038092	51.1266088278097	0.50751224207896	0.214791444226469	2.36281404925913	0.0181367673380594	0.0972524006397211	99.8734653304583	75.3906231270365	79.1022839543568	122.787783035653	127.266146887907	110.383494693847
FBgn0039066	347.739600814169	0.378311369744772	0.16020791926649	2.36137746171891	0.0182071879975366	0.097573737176424	186.668262581928	184.610372016205	216.432638041782	260.797192067462	261.804645026551	241.041508821257
FBgn0035641	285.684603639584	-3.01579690631475	1.27857468668033	-2.35871782675827	0.0183381938126278	0.0981551176047583	0	1.93309290069324	7.6904998288958	1.01477506641036	0	0
FBgn0050342	157.549049777864	-0.398475011646128	0.168956808696907	-2.35844305251384	0.0183517753000675	0.0981551176047583	126.030801488436	112.119388240208	137.330354087425	96.4036313089839	86.0561564670607	101.372597167818
FBgn0265068	22.751640121469	-0.794721524745138	0.336978186581031	-2.35837676262774	0.018355053181602	0.0981551176047583	32.1021852847902	62.8255192725304	32.959284980982	27.3989267930796	26.6652879193709	20.2745194335637
FBgn0053517	930.004349716917	0.704120597639174	0.298568826044758	2.35831920889698	0.0183578994960932	0.0981551176047583	2138.95671582732	1184.98594812496	1734.75703283235	2663.78454932719	2811.97581695184	2764.09281610918
FBgn0265104	157.469242085203	0.514713247784575	0.218395684973139	2.35679220424104	0.0184335586162103	0.098503004605473	233.038085771069	194.275836519671	236.208209030371	302.402969790286	310.286986698134	334.529570653801
FBgn0038948	400.996108403271	-0.345789750538946	0.14674251452344	-2.35643877074024	0.0184511091742092	0.0985401568649035	249.683663326146	323.793060866118	250.490565855463	207.014113547713	241.199649816128	202.745194335637
FBgn0015794	452.141514470585	-0.433562345717468	0.184049397754476	-2.35568467491453	0.0184886044439221	0.0986837222270882	429.218106955898	581.860963108666	503.178417376325	384.599750169525	361.193445453297	376.204971711682
FBgn0033631	1054.69612388793	-0.278807646967877	0.118440577504841	-2.35398756778673	0.018573232259728	0.0990340441864203	375.714464814581	443.644820709099	390.018205608287	329.801896583366	378.162265038351	291.727807405166
FBgn0022981	681.366130225822	-3.01792325082415	1.28207239041086	-2.35394137912682	0.0185755402302772	0.0990340441864203	0	0	9.8877854942946	0	1.21205854178959	0
FBgn0030400	509.608079990908	0.736560022826331	0.313150112782986	2.35209885853297	0.0186678128312954	0.0993624985945871	820.389179500194	426.24698460286	628.423700304057	1066.52859479729	1089.64062906884	966.418759666535
FBgn0037623	329.668007499724	0.31529036025809	0.134049905695927	2.35203716572007	0.0186709093055305	0.0993624985945871	447.052654336337	350.856361475824	457.035418402951	531.742134799027	521.185172969523	505.736623648338
FBgn0004575	832.421623035203	0.829888045540222	0.352842570819229	2.3520065722608	0.0186724450134321	0.0993624985945871	1903.54069040552	781.936078330417	1391.98046903014	2429.37150898639	2442.29796170602	2374.37149810846
FBgn0033927	218.808728802745	-1.08399736322009	0.460911015891783	-2.3518582239193	0.0186798932612754	0.0993624985945871	194.991051359466	398.217137542808	208.742138212886	126.846883301295	152.719376265488	99.1198727863113
FBgn0029133	1150.8296856983	-0.283293932486462	0.120486596245169	-2.35124853149647	0.01871053189273	0.0994685680609509	672.956921155231	862.159433709186	689.947698935223	608.865039846214	620.573973396269	601.477409862389
FBgn0037538	240.999716202159	-0.344710193076206	0.146657145922888	-2.35044934842421	0.0187507594974609	0.0996254638899377	187.857232407291	209.740579725217	187.867924391597	146.127609563091	150.295259181909	165.57524204077
FBgn0052109	145.814736415534	-0.456108262819981	0.194110461970252	-2.34973559997957	0.018786750609009	0.0997596842733102	140.298439392787	174.944907512738	163.697782072211	134.965083832577	112.721444386432	101.372597167818
FBgn0050285	124.024134987496	-0.548166772801366	0.233362425557619	-2.34899329440685	0.0188242458148184	0.0998915103636987	219.959417692081	321.859967965425	208.742138212886	174.541311422581	185.444956893807	154.311620133235
FBgn0034398	2964.73663097695	-0.375814087503302	0.160003706226966	-2.34878363986274	0.0188348476942284	0.0998915103636987	3528.86244167619	4873.32720264766	3648.59284739471	3209.73353505596	3072.5684034366	3006.26068712119
FBgn0037487	22.1737114103219	0.624220559889602	0.265783366617645	2.34860656569079	0.0188438061064667	0.0998915103636987	35.669094760878	31.8960328614385	43.945713307976	58.8569538518007	65.4511612566377	47.3072120116486
FBgn0015524	17.8248419355836	0.912499242816075	0.38869703023279	2.34758480729729	0.0188955710163564	0.100088863696567	33.2911551101528	13.5316503048527	23.0714994866874	41.6057777228246	39.9979318790564	48.4335742024021
FBgn0029864	137.639664070569	0.710836059618313	0.302841506827854	2.34722138013393	0.0189140131317828	0.100088863696567	297.24245634065	162.379803658232	261.476994182457	366.333798974139	420.584314000987	391.974042382231
FBgn0034936	379.943442189291	-0.313696217414835	0.133674590918229	-2.34671537245795	0.0189397167110903	0.100088863696567	304.376275292825	339.257804071664	310.91592165393	263.841517266693	232.715240023601	271.453287971603
FBgn0020272	175.297571156906	-0.463426830754844	0.197480350100301	-2.34669844629842	0.0189405770338266	0.100088863696567	61.8264309188552	72.4909837759966	69.2144984600622	45.6648779884661	55.754692922321	47.3072120116486
FBgn0001942	14296.575798303	-0.271028923497569	0.115498415596749	-2.34660295638894	0.0189454312346251	0.100088863696567	14531.5892055817	16902.9643236617	13801.1512643699	12652.2155280043	12634.4982396147	12203.0079746238
FBgn0053147	485.8209331191	0.881252499719043	0.375582251916605	2.34636353347899	0.0189576070097791	0.100088863696567	996.356713653858	475.540853570538	897.59119431541	1431.84761870501	1505.37670890267	1425.97453349398
FBgn0035431	78.7024530820502	-0.630248086459302	0.26860879234318	-2.34634198293139	0.0189587032915454	0.100088863696567	42.8029137130536	48.3273225173311	34.0579278136814	29.4284769259004	31.5135220865293	20.2745194335637
FBgn0041605	3949.15840747492	0.540286305392008	0.230331114393474	2.34569396676924	0.0189916939417646	0.100088863696567	8030.302200499	5526.71260308198	7380.68255007457	10308.0851245964	10640.6619383708	9498.61235462458
FBgn0283535	3371.45316079616	0.315446892331369	0.134479870244483	2.3456811176118	0.0189923486025024	0.100088863696567	2734.63059833398	2448.26215872799	2867.45779334544	3340.6395186229	3378.00715596758	3297.98849452636
FBgn0027784	119.463199706096	-0.426317326995276	0.181754394300547	-2.34556819732414	0.0189981027061821	0.100088863696567	76.0940688232064	99.554284385702	79.1022839543568	74.0785798479561	58.1788100059002	57.4444717284304
FBgn0036485	95.674074364931	0.699519861483446	0.298251574804365	2.34540207186597	0.019006570768134	0.100088863696567	187.857232407291	100.520830836049	148.316782414419	273.989267930796	232.715240023601	200.49246995413
FBgn0034756	528.989679878068	-0.830688211209305	0.35418809490125	-2.34533069622486	0.0190102100761602	0.100088863696567	590.918003205212	1259.41002480165	917.366765303999	583.495663185955	556.334870681421	416.754010578809
FBgn0030944	351.847342545373	-0.305868543691583	0.130428270947257	-2.34510924257573	0.0190215054541283	0.100091656883127	288.919667563112	314.127596362652	255.98378001896	231.368715141561	252.108176692234	212.882454052419
FBgn0036494	158.582746619992	0.930885124086566	0.397084975608584	2.3442970176846	0.0190629837229857	0.100226057756874	324.58876232399	159.480164307192	248.293280190064	441.427153888505	504.216353384468	449.418514110661
FBgn0037669	129.451895887817	-0.540886774387087	0.230735331110037	-2.3441870466259	0.0190686057401494	0.100226057756874	41.613943887691	59.9258799214905	42.8470704752766	32.4728021251314	39.9979318790564	28.1590547688384
FBgn0031474	802.55889706869	0.301192704441675	0.128499541061722	2.34392046814395	0.0190822399674381	0.100241054924994	1035.59271789082	792.568089284229	908.577622642404	1123.35599851627	1145.39532199116	1100.45586036621
FBgn0036725	72.0951581677457	1.14409227931626	0.488169208390535	2.34363876224039	0.0190966571517704	0.100260145791734	152.188137646413	45.4276831662912	109.86428326994	236.442590473613	207.262010646019	234.283335676736
FBgn0264744	57.0329579749792	0.827873122090566	0.353346236417731	2.34295157770364	0.0191318659315657	0.100365707571728	8.32278877753819	11.5985574041595	18.6769281558898	27.3989267930796	23.0291122940022	18.0217950520566
FBgn0004654	1943.16654299367	0.273561711103094	0.116766645414513	2.34280697310408	0.0191392821562109	0.100365707571728	2210.29490534907	2151.53239847158	1936.90731404904	2527.8046904282	2287.15446835695	2797.88368183179
[truncated: 7,856 more rows]
