# Supplementary material for: Male manipulation impinges on social-dependent tumor suppression in Drosophila melanogaster females
Source: Research Square preprint supplement (doi:10.21203/rs.3.rs-3575658/v1), 2023-12-04
Supplement: Supplementary file 2 [file 21be4f71e891ee39b9de1fd2.xlsx]

## Sheet: Feuil1
ID	baseMean	log2FoldChange	lfcSE	stat	pvalue	padj	Virgin_rep1	Virgin_rep2	Virgin_rep3	Virgin_alone_rep1	Virgin_alone_rep2	Virgin_alone_rep3
FBgn0267429	2531.17518342195	1.62520054225916	0.223418085590881	7.27425686224526	3.48332639009764e-13	3.04338226702831e-09	3154.33694668698	1981.42022321057	2267.59880669156	10073.9030996249	7833.37555706041	4924.36550182118
FBgn0267431	1288.62365058439	1.4067106699131	0.225919589035871	6.22659892360971	4.7666929822001e-10	1.85606431547039e-06	1662.17981585691	791.601542833883	1160.16683133057	3839.94851407178	3558.24217796342	2175.8179308244
FBgn0000500	127.729480709981	-0.954194431076443	0.154377539664924	-6.18091487367603	6.37311771364446e-10	1.85606431547039e-06	301.9983356421	338.291257621317	287.844422167243	157.041214601542	152.724039669154	170.570812932696
FBgn0267428	455.128765258446	1.67097112118455	0.282300177734963	5.91912883155652	3.2365137200475e-09	5.84601787319616e-06	527.902602460994	213.606765526603	316.409135817427	1395.92190756926	1255.98426653289	710.018343264557
FBgn0050440	240.161005312144	0.863356922016945	0.145993268642719	5.91367622660597	3.34555217648859e-09	5.84601787319616e-06	200.935900486279	150.781246254073	175.782853231904	330.368184791393	347.618149993223	275.964160761029
FBgn0284435	93.3002665443785	1.14304850638772	0.197526786095257	5.786802534399	7.17388259733972e-09	9.26291239525555e-06	73.7161291724812	60.8924263718371	72.5104269581604	182.633116240312	157.282966226442	113.713875288464
FBgn0263780	3683.81636087906	1.55391455160878	0.268792172888366	5.7811004498786	7.4213559307301e-09	9.26291239525555e-06	5138.72758521715	2243.35431125451	3222.31942830734	12809.9100384606	11592.2105035445	6727.14645151634
FBgn0087011	740.720047527399	1.29212197129978	0.225626534223078	5.72681744081681	1.02332186011351e-08	1.11759538647647e-05	1045.10447649372	578.961323757626	794.318768041666	2240.45466164867	2098.24594799188	1578.12670827161
FBgn0267430	105.868752838614	1.30759473321602	0.229905117782343	5.68754078129725	1.28881831840105e-08	1.25115618309667e-05	92.7396463782827	60.8924263718371	82.398212452455	218.694432185851	230.225791143053	130.354930208727
FBgn0058006	1317.53149104198	1.13226621077288	0.200491702714863	5.6474467294199	1.62848272050012e-08	1.42280535290095e-05	1701.41582009388	1027.43887671846	1379.89539787045	3571.2335468647	3244.81597714986	2184.13845828453
FBgn0010247	2625.94656912587	1.17183102477548	0.213502194890789	5.48861347947685	4.05100980132084e-08	3.21760660310365e-05	2892.7635851072	1327.06827632591	2263.20423536076	5397.56470926782	5025.07679777089	4176.90478498603
FBgn0260995	1530.53880629645	1.56131485750789	0.290673325794458	5.37137301209378	7.81393855435775e-08	5.68919842911864e-05	2197.21623727008	1011.97413351291	1367.81032671075	5661.62660344967	5061.5482102292	2779.05617168393
FBgn0042201	406.731541327052	0.574005079630824	0.107297901788879	5.34963936909265	8.81296704661285e-08	5.92299177586588e-05	652.744434124067	602.158438565945	638.311485798352	959.696311453869	996.125452767466	858.401082970236
FBgn0260798	1394.2779172324	0.978136777868586	0.187343533940671	5.22108640364577	1.77876519365877e-07	0.000111007653549976	1734.70697520403	1044.8367128247	1563.36875093125	3342.06970037208	2996.35447977765	2210.48679524161
FBgn0051176	85.8224072388008	1.23247822124899	0.241839212581904	5.09627122951199	3.46408723870157e-07	0.000201771534696904	92.7396463782827	62.8255192725304	80.2009267870562	239.63326079939	172.099477537629	138.675457668859
FBgn0263111	1181.28899426967	1.1169019602134	0.224531696276242	4.9743621000363	6.54628447292672e-07	0.000331646699395854	1998.65827643453	1078.66583858683	1366.71168387805	4024.90816682471	3394.12082190105	2213.26030439499
FBgn0260987	1001.63253132605	0.398141593318901	0.0801069803157062	4.97012359908965	6.69102348947789e-07	0.000331646699395854	820.389179500194	741.341127415859	798.713339372464	1083.00274662249	1043.99418161899	977.661976565455
FBgn0267161	1199.07116315264	0.827941316207486	0.16671987761701	4.96606240384508	6.83259767554695e-07	0.000331646699395854	1477.88949292571	1115.3946037	1435.92618233812	1970.57642618528	2451.56275618172	2729.13300692314
FBgn0259481	1922.9361523027	0.594728539558299	0.120289684381374	4.94413583855399	7.6482362557618e-07	0.000351698106139952	2668.04828811367	2304.24673762635	3071.80536022752	4561.17483298257	4101.89416992004	3479.36723291167
FBgn0085387	561.417644206472	1.562227621853	0.31795757629409	4.91332095325837	8.95465083989986e-07	0.000391183921941025	719.326744344373	353.756000826863	573.491558669087	2262.55675851852	1749.48806635934	845.920291780039
FBgn0040849	105.816136655768	1.31656605282094	0.268962484562895	4.89498026076225	9.83155962956943e-07	0.000409039697540705	121.274922186985	102.453923736742	81.2995696197556	321.062038740931	284.932909830511	151.156248859056
FBgn0058263	2416.88467594305	1.03446172397038	0.21287829158254	4.85940448074897	1.17739370184433e-06	0.000467585853318814	3415.91030826675	1761.04763253154	2523.58258671052	5930.34157065676	5542.5149620231	4294.77892400456
FBgn0003380	1077.66122237119	1.46569144262808	0.303220387804352	4.83374964738121	1.33985068057698e-06	0.000508968495487001	1470.75567397354	762.605149323484	1090.9523328705	4192.41879573302	3369.04672583596	1615.56908184221
FBgn0261549	2211.53093306968	1.36211140763881	0.282607858227329	4.81979310901939	1.4370717348446e-06	0.000523153989472387	3049.70760205507	1559.0394244091	2496.11651589304	8021.89789549804	6531.80202495463	3705.40822891191
FBgn0005561	242.65813901489	0.695145311286172	0.147551384775143	4.71120831800745	2.46252357285447e-06	0.000860602738241181	433.973986257349	334.425071819931	424.076133421969	721.226318910787	561.887698185768	644.840878160194
FBgn0267987	17.1010159228836	1.5366364351312	0.326815667620854	4.70184445659407	2.5782187455736e-06	NA	22.5904266818894	13.5316503048527	17.5782853231904	60.4899493280015	51.287923769492	41.6026373006577
FBgn0264815	1056.01779348499	1.09899300003198	0.235620050725385	4.66425924554635	3.09730712002953e-06	0.00104081431952685	1567.06222982791	846.69469050364	1208.50711596934	3356.02891944777	2647.59659814511	1750.084275781
FBgn0264001	791.338432040777	1.37301624029368	0.296563348792367	4.62975700094003	3.66095096373756e-06	0.00118465661371019	1275.76462261407	500.67106127955	782.233696881973	3000.06883301761	2383.17885782239	1238.37183698291
FBgn0262123	408.81372356136	1.06237629138389	0.231202797676905	4.59499756083621	4.32754330731075e-06	0.00135034806699907	562.382727396509	318.960328614385	495.48791754743	1077.18640534095	1007.52276916069	786.28984498243
FBgn0024804	2455.85319656285	1.01478848339228	0.225591244392433	4.49835048397083	6.84827329081853e-06	0.00206321943937522	3299.39126538121	1475.91642967929	2722.43693942911	5520.87114443644	5190.33788547259	4433.45438167342
FBgn0263354	144.11665852487	1.39315815681272	0.312190568285903	4.46252481124564	8.09995461608892e-06	0.0023589767826923	215.20353839063	78.2902624780763	179.078781730002	516.491105800628	446.774802614241	273.190651607652
FBgn0037525	911.234623833779	0.592344913811085	0.132987072301039	4.45415410356738	8.42245921214157e-06	0.00237377503666067	1512.36961786123	1221.71471323813	1324.96325623548	2343.98553646006	2075.45131520544	1694.61409271346
FBgn0266348	276.279159424268	1.55893511308716	0.352941960516604	4.41697300826835	1.00092723550921e-05	0.00273284414270123	362.635796735593	147.881606903033	293.33763633074	1126.04367210587	865.056314245431	373.03698112923
FBgn0287183	3856.0890217804	0.899762262010428	0.204248107717771	4.40524160573236	1.05666039769557e-05	0.00279758845292916	6545.27888862111	3690.2743474234	5007.61403144387	10129.7399759276	9947.5777480028	8357.96983370212
FBgn0264384	140.552844929957	1.22200194633966	0.281794386432682	4.3365020922146	1.44768049720393e-05	0.00372011308943258	48.7477628398666	23.1971148083189	19.7755709885892	77.9389731726173	64.9647034413565	67.9509742577408
FBgn0285944	1289.23110877391	1.19712528775907	0.278104956384711	4.30458091549812	1.67302136868511e-05	0.00411581322494644	1731.14006572794	1280.67404670927	1399.67096885904	4777.54272865581	3581.03681074986	1752.85778493438
FBgn0053100	741.85507355107	1.1111557985454	0.2585934225319	4.29692212456922	1.73186003237441e-05	0.00411581322494644	938.097192211091	376.953115635182	628.423700304057	1741.41257969266	1467.97435144679	983.208994872209
FBgn0052547	74.0697386145545	0.878542279307374	0.204526137845305	4.29550124283806	1.742990606879e-05	0.00411581322494644	108.196254107997	77.3237160277297	123.047997262333	198.91887182862	186.915988848815	178.891340392828
FBgn0020503	2350.09874998191	0.301468536675844	0.0703538170235579	4.28503455007847	1.82710791503555e-05	0.00420090575096462	3270.85598957251	3219.5662261046	3473.9086369955	4359.92942464134	4063.14329418309	3852.4042140409
FBgn0004652	676.416155440998	1.20654352256166	0.28225984868826	4.27458431714182	1.91494227626061e-05	0.00428996170966382	990.411864527045	506.47033998163	842.65905268044	2260.2302220059	1947.80137160137	1187.06191764543
FBgn0285926	803.547070447339	0.773010850769824	0.182317069638647	4.2399258188053	2.23593664781305e-05	0.00488384462298565	413.761499226185	286.0977493026	301.028136159636	689.818075990478	608.616695397972	406.319090969756
FBgn0266096	87.5690503014919	1.2268852624066	0.290047890176328	4.22994030972175	2.33753328019034e-05	0.00498122640707879	46.3698231891414	13.5316503048527	32.959284980982	82.5920461978481	72.9428249166108	56.8569376442321
FBgn0023076	212.30923856748	0.632723478163203	0.150390637022014	4.20719993406629	2.58554377322477e-05	0.00537854665396781	261.573361579772	255.168262891508	348.26977796571	422.266377039702	503.761384580343	413.252863853199
FBgn0085434	1087.73019999075	0.989460145105544	0.23584668164653	4.19535326169428	2.72446623757668e-05	0.00553573523667615	1615.80999266777	899.854745272704	1387.58589769934	3299.02877488869	2739.91486093019	1705.70812932696
FBgn0003429	1702.39259832958	0.930830949039186	0.222216600804413	4.18884523329772	2.80377525722997e-05	0.00556740555054961	3169.79355441669	1673.09190555	2329.12280532273	5605.7897271469	4972.64914236208	3088.30244228549
FBgn0040823	326.723945328765	1.18232949506835	0.282981736636043	4.17811237263344	2.93938429070675e-05	0.00570697789953441	532.658481762444	216.506404877643	337.283349638716	1072.53333231572	858.217924409499	529.740248295041
FBgn0262509	893.271056734347	0.856282181428415	0.206746363199734	4.14170371935962	3.44735482900734e-05	0.00654772590022546	1552.79459192355	952.048253591422	1366.71168387805	2687.14967207083	2410.53241716612	1906.78754294681
FBgn0011224	1543.5647982921	1.0943322336277	0.264555119392085	4.13649993295287	3.52643458133648e-05	0.0065554167951355	1885.70614302508	823.497575695321	1326.06189906818	3557.27432778901	3089.81247420206	1963.64448059104
FBgn0011288	2469.64168057935	1.16883170961713	0.284710845717818	4.10532906349333	4.03739741261156e-05	0.00734890441541401	4418.21187104742	1821.94005890338	3288.23799826931	8344.12320249528	7608.84842411396	5465.19978672973
FBgn0266450	366.236052878692	0.792389663111586	0.193669973300251	4.09144303377957	4.2869725943079e-05	0.00764393460336084	403.060770797921	362.454918879983	565.801058840191	900.369630382176	729.428249166108	673.962724270654
FBgn0266347	1416.07011840028	1.06374942028416	0.260973855490997	4.07607657971264	4.58019403500135e-05	0.00800343105676136	2312.54631033026	938.516603286569	1701.79774785137	3805.05046638255	3695.00997468207	2848.39390051836
FBgn0039078	34.5942719151043	1.16705720143335	0.288613711994205	4.04366512377204	5.26220650480353e-05	NA	53.503642141317	32.8625793117851	46.1429989733748	116.326825630772	104.855310817628	73.4979925644952
FBgn0262018	283.685544277232	1.23729050129906	0.307019879286117	4.03000126303226	5.57765531811064e-05	0.00955528912045739	423.273257829085	217.47295132799	347.171135133011	1005.06377344987	837.702754901702	482.590592687629
FBgn0004865	132.614149400821	1.04582192399282	0.261820518817778	3.99442308309186	6.48519699453333e-05	0.0108963781040842	204.502809962367	96.6546450346621	172.486924733806	403.654084938779	361.294929665088	208.013186503288
FBgn0032910	336.147584440664	0.696765188307703	0.175114583531139	3.9789101184928	6.92319057460161e-05	0.0114128143491121	223.526327168169	179.777639764472	194.459781387794	336.184526072931	360.155198025766	269.030387877586
FBgn0000504	551.552639138314	0.92233021727651	0.232801861117019	3.96186788563901	7.43656882602835e-05	0.0119590391579406	598.051822157387	507.436886431976	783.332339714672	1381.96268849357	1187.60036817357	1008.1705772526
FBgn0287613	165.779794351462	1.2921916888713	0.326722867493894	3.95500841059265	7.65319593857727e-05	0.0119590391579406	205.69177978773	91.821912782929	223.024495037978	456.001156472626	365.853856222376	450.695237423791
FBgn0051973	112.98416361942	0.892930351284635	0.225793393910624	3.95463452592456	7.66517331858389e-05	0.0119590391579406	174.778564328302	94.7215521339689	151.612710912517	311.755892690469	256.43961884746	209.399941079977
FBgn0038653	387.283853516402	1.07763028067843	0.275197933911277	3.91583710445245	9.00910642299245e-05	0.0138092215469623	636.098856568991	311.227957011612	481.205560722337	1364.51366464896	1037.15579178306	608.78525916629
FBgn0283427	19677.2263323982	0.93738995714396	0.240222805465551	3.90216888578626	9.53346009004276e-05	0.0143610070356385	28622.0706059539	18579.9224150131	26163.0804179035	59230.1298064202	52996.3814968357	28267.6052912202
FBgn0038755	551.803446423708	0.778713401020759	0.200173691569831	3.89018854033125	0.000100166366131881	0.0148331108626143	689.602498710308	471.674667769151	637.212842965652	1240.04396122403	1071.34774096272	769.648790062167
FBgn0261698	700.710268353461	1.08038689783852	0.278048697450638	3.88560316140418	0.000102076134509259	0.0148639864534565	1017.75817051038	445.577913609792	766.852697224181	2039.20925330743	1677.68497308205	994.303031485718
FBgn0004595	2183.44496329009	0.851723835960005	0.219575765391473	3.87895191639887	0.000104907486907042	0.0150258477558496	3702.45203617913	2459.86071613215	2875.14829317433	6627.13925618508	6221.79501905904	3455.79240510796
FBgn0000723	556.015532256181	0.393289409955693	0.101499556955293	3.87478942522798	0.000106716940088925	0.0150384823476925	797.798752818304	795.467728635269	890.999337319214	1138.83962292526	1093.00264210984	1028.97189590293
FBgn0085638	2104.79859780675	1.22849617389322	0.317806372280091	3.8655492181589	0.000110839493206334	0.01537150241498	3193.57295092394	984.910832903207	2508.20158705273	5655.81026216814	5372.69494776411	4635.92054986995
FBgn0034408	272.520899346976	0.888771231608811	0.230404589380552	3.85743718906941	0.000114582110659946	0.015439736574629	473.209990494315	265.800273845321	392.215491273686	866.634850949252	755.642076870515	467.336292344054
FBgn0039925	375.826142490522	0.988979137956845	0.256422635280191	3.8568324394459	0.000114865843808045	0.015439736574629	737.161291724812	355.689093727557	522.953988364915	1141.16615943787	1165.94546702645	895.843456540828
FBgn0028920	1929.23098617761	4.83427333852981	1.25590199398293	3.84924409841768	0.000118482891685129	0.015684621585651	0	0	0	11.6326825630772	3.41919491796613	1.38675457668859
FBgn0052600	243.324185981806	1.37119371557498	0.357178448883727	3.83895982487272	0.000123556643680373	0.0161121551617226	347.179189005879	130.483770796794	280.153922338347	860.818509667713	735.126907362718	360.556189939033
FBgn0266801	547.775437804204	1.01255700920024	0.264751648040682	3.82455413098939	0.00013100896074488	0.0161640164859599	884.593550069774	500.67106127955	648.199271292646	1819.35155286527	1417.82615931662	861.174592123613
FBgn0085450	773.231949346613	0.832769465976075	0.217750797142823	3.82441523476885	0.000131082833894794	0.0161640164859599	1167.56836850607	675.615968792288	1031.62561990474	2000.82140084928	1757.46618783459	1357.63273057813
FBgn0263995	1294.57117026508	0.697862479028493	0.182532463174074	3.82322391805435	0.000131718060067238	0.0161640164859599	2319.68012928243	1502.01318383865	1856.70638726199	3899.27519514348	3089.81247420206	2216.03381354836
FBgn0015519	425.289431167943	1.11507268991991	0.291690639593044	3.82279215910258	0.000131948995059253	0.0161640164859599	678.901770282044	330.558886018544	539.433630855406	1430.8199552585	1192.15929473086	728.046152761509
FBgn0003339	92.1070781977893	0.639223827147966	0.167515234714863	3.81591458374532	0.000135679437294149	0.0161640164859599	142.676379043512	142.082328200953	150.514068079818	264.061894181852	232.505254421697	178.891340392828
FBgn0037171	149.202054864294	1.12417373345406	0.295052957073444	3.81007445105602	0.000138924949198079	0.0161640164859599	216.392508215993	119.851759842981	208.742138212886	465.307302523088	429.678828024411	289.831706527915
FBgn0025574	897.326448713588	0.546439762963792	0.143449760737565	3.8092762243325	0.000139374183178967	0.0161640164859599	801.365662294392	729.742570011699	873.421051996023	1305.18698357726	1184.1811732556	1019.26461386611
FBgn0053653	2293.28260024438	0.650151086305563	0.17096732031238	3.80277988283171	0.000143081476473902	0.0161640164859599	4373.03101768364	2832.94764596595	3948.52234072164	6110.64815038445	6269.66374791056	5119.89789713427
FBgn0263873	581.860974760841	0.778725084918014	0.204942307487931	3.79972829652986	0.000144854815761012	0.0161640164859599	917.884705179927	532.567094140988	822.883481691851	1477.3506855108	1377.93555194035	1040.06593251644
FBgn0283451	100.793125263888	1.05752052335935	0.278368919025204	3.79898922287225	0.000145287409191648	0.0161640164859599	121.274922186985	79.2568089284229	96.6805692775472	262.898625925545	208.570889995934	144.222475975613
FBgn0264959	1240.14695492503	0.541536371556844	0.142581714720687	3.79807728233384	0.000145822861456659	0.0161640164859599	1280.52050191552	1016.80686576465	1282.1161857602	1992.67852305512	1750.62779799866	1461.63932382977
FBgn0003256	1786.99731551942	0.660713903973319	0.174091096090628	3.79521939266421	0.000147512952952264	0.0161640164859599	1973.68991010191	1393.75998139983	1762.22310364984	2948.88502974007	2715.98049650443	2440.68805497192
FBgn0037836	52.3601965301904	1.04707131686691	0.275952270027857	3.79439283743238	0.000148005187006614	0.0161640164859599	86.7947972514697	59.9258799214905	61.5239986311664	175.653506702466	164.121356062374	87.3655383313811
FBgn0000546	1242.89925670916	0.90697837027161	0.239914181188639	3.78042834224324	0.000156558775598068	0.0168870866963002	1728.76212607722	915.31948847825	1552.38232260425	3223.41633822869	2702.30371683257	1938.68289821065
FBgn0028582	1217.2482752043	0.356226700026777	0.0943895112551456	3.77400725239328	0.000160646087169027	0.0169623804549952	1456.48803606918	1382.16142399567	1586.44025041793	2052.00520412682	1995.6701004529	1610.02206353545
FBgn0026373	188.970359506126	-0.598316039341067	0.15856815011585	-3.77324222363657	0.000161139702159162	0.0169623804549952	154.566077297138	174.944907512738	128.54121142583	87.245119223079	104.855310817628	112.327120711776
FBgn0262475	308.048472566573	0.789696727195941	0.209483607443336	3.76973041868945	0.000163423971755231	0.0169980385860173	282.974818436299	194.275836519671	244.997351691966	535.103397901551	427.399364745766	281.511179067783
FBgn0000427	2086.31376261897	5.01681795160183	1.33407446127935	3.76052319207939	0.000169558352979986	0.0171222436841611	0	0	0	16.2857555883081	0	2.77350915337718
FBgn0031971	506.649398669145	-0.560167374301166	0.149030102832873	-3.75875318914161	0.000170762181829398	0.0171222436841611	777.58626578714	785.802264131803	760.260840227985	481.593058111396	553.909576710513	540.83428490855
FBgn0001085	583.657386799993	0.862975539488313	0.229731306541939	3.75645597667279	0.000172336570621093	0.0171222436841611	378.092404465307	245.502798388042	310.91592165393	732.859001473864	574.42474621831	388.291281472805
FBgn0025726	5637.08979490477	1.02028355321923	0.27192561503676	3.75206856875659	0.000175381477817913	0.0171222436841611	8675.91281567089	4473.17697220416	7257.63455281224	15929.7955018779	15235.9325544571	10221.7679847716
FBgn0027568	737.677363788837	0.329041458404429	0.0876998487618798	3.7519045135167	0.000175496309295152	0.0171222436841611	583.784184253036	510.336525783016	627.325057471358	728.205928448633	704.354153101023	726.65939818482
FBgn0052982	276.55440538505	0.492503514739046	0.131311499851967	3.75065028801182	0.000176376551628076	0.0171222436841611	430.407076781261	326.692700217158	426.273419087367	630.491394918784	560.747966546446	467.336292344054
FBgn0264490	2093.09907726642	0.814837641397389	0.21872687484708	3.72536590195911	0.000195032112011993	0.0185564458038199	3590.68887259505	2022.98172057548	3087.18635988532	5758.17786872322	5389.79092235395	4153.32995718232
FBgn0052423	2577.55057625019	0.8876785105092	0.23830980079693	3.72489300708876	0.000195398078740006	0.0185564458038199	3550.26389853272	1921.49434328908	2888.33200716672	6232.79131729676	5662.18678415191	3568.11952581974
FBgn0035533	636.942757701806	0.394721601724232	0.106335328494328	3.7120457266024	0.000205590832737364	0.0193144850067349	682.468679758132	654.351946884663	702.032770094917	934.104409815099	920.903164572211	822.345463976333
FBgn0264574	838.826093815255	0.752574544923786	0.203559998801375	3.6970649899547	0.00021810652016823	0.0202723049649981	1263.87492436044	771.304067376604	1020.63919157774	2146.22993288774	1849.78445061968	1146.84603492146
FBgn0053202	268.109758693871	1.01329504099855	0.274337581143194	3.6936063836972	0.000221095950985061	0.0203338455132261	457.753382764601	241.636612586655	355.960277794606	925.961532020945	745.384492116617	454.855501153857
FBgn0086676	1313.56739274133	0.449256262718615	0.122149635278025	3.67791734863607	0.000235146125124893	0.0209236906782896	1502.85785925833	1334.80064792868	1575.45382209094	1969.41315792897	2213.35884356341	1838.83656868907
FBgn0019985	313.342903801743	0.791509347459501	0.2152658247871	3.67689273595711	0.000236092255614267	0.0209236906782896	562.382727396509	325.726153766811	480.106917889638	874.777728743406	845.680876376957	643.454123583505
FBgn0262869	542.010323946756	1.24723241482683	0.339233013113289	3.67662452242026	0.000236340514078445	0.0209236906782896	876.270761292236	352.789454376517	644.903342794548	1972.90296269789	1558.01315095323	913.87126603778
FBgn0032938	1082.62291074923	0.446170534162227	0.121379943266766	3.67581761989825	0.000237088860839037	0.0209236906782896	1060.56108422344	818.664843443588	1060.19033355492	1390.10556628773	1330.06682308883	1279.97447428357
FBgn0028704	1046.26329548125	1.17511103342446	0.320240526736892	3.66946384143916	0.000243059712854609	0.0211275659682866	1918.99729813524	792.568089284229	1220.59218712903	3755.02993136132	3281.28738960816	1838.83656868907
FBgn0261552	2538.03273987515	0.665593576018165	0.181448153159274	3.66823009454337	0.000244235339681464	0.0211275659682866	3832.04974714366	3042.68822569116	3304.7176407598	6596.89428152108	5524.27925579395	4021.58827239691
FBgn0053970	805.483429153702	0.580965724119688	0.158539372739138	3.66448860041608	0.000247833277244486	0.0212286210125987	1456.48803606918	1048.70289862608	1200.81661614044	2321.88343959021	1877.13800996341	1338.21816650449
FBgn0016684	147.364826175899	-1.60326510107165	0.441004696902585	-3.63548305116078	0.000277460236538789	0.0235356319091204	21.4014568565268	20.297475457279	17.5782853231904	9.30614605046176	5.69865819661022	4.16026373006577
FBgn0267033	1168.86492457856	1.08068332347843	0.298150534421025	3.62462313065107	0.000289383126026137	0.0243109651162534	1690.71509166562	780.002985429723	1307.38497091229	3238.53882556069	2897.19782715664	1851.31735987927
FBgn0250816	957.048206855597	0.719667038649693	0.199041414897099	3.6156648053459	0.000299577811283665	0.0245719652390152	185.479292756565	126.617584995407	198.854352718591	333.857989560316	265.557471962036	238.521787190437
FBgn0046706	846.622683172153	0.638959505259878	0.176722707284594	3.61560500672332	0.000299646979307204	0.0245719652390152	741.917171026262	588.626788261092	620.733200475161	1032.98221160126	1086.16425227391	916.644775191157
FBgn0000479	1138.71809951191	1.0103297701608	0.279521262561553	3.61450059613377	0.000300927123792449	0.0245719652390152	1630.07763057212	835.096133099481	1233.77590112143	3158.27331587546	2702.30371683257	1586.44723573175
FBgn0029768	305.763231447174	0.485539196710282	0.134583917778869	3.60770591853373	0.000308916345281273	0.0249907602659489	449.430593987063	399.183683993155	460.331346901049	597.919883742168	678.140325396616	553.315076098747
FBgn0025741	3654.13006444289	0.535574636342728	0.149020619826244	3.59396328486086	0.000325685750688031	0.0261056550803791	3343.38314891963	2630.9394378435	3190.45878615906	4587.93000287765	4635.28857712275	4057.64389139081
FBgn0259241	124.898785073916	1.15000688495223	0.320392578044171	3.58936805581585	0.000331480555846279	0.0263285965129904	203.313840137004	100.520830836049	170.289639068407	459.490961241549	364.714124583054	224.654241423551
FBgn0028875	464.88082227743	1.15200179018216	0.322564971366731	3.57137907845682	0.000355106490672967	0.0279510397208082	867.947972514697	346.02362922409	577.886129999885	1648.35111918804	1426.9440124312	902.777229424271
FBgn0264078	668.799199021368	0.471628177156282	0.132437685412543	3.56113273715983	0.000369258339599158	0.028805447438195	966.632468019793	722.976744859273	903.084408478907	1336.59522649757	1219.51285407459	1033.132159633
FBgn0037612	635.40941328746	0.56311332795198	0.158271413642973	3.55789662195249	0.000373836376316862	0.0289044992909772	643.232675521166	751.006591919325	599.858986653873	1192.34996271541	999.544647685433	753.007735141904
FBgn0260660	490.510677872856	0.583866133978783	0.164304830151229	3.5535542895567	0.00038006274282531	0.0291281419654801	741.917171026262	572.1954986052	752.570340399089	1197.00303574064	1032.59686522577	863.948101276991
FBgn0259175	694.368136800711	0.480244755880268	0.13560348203291	3.54153705111875	0.00039780298537142	0.0302226494190443	872.703851816148	725.876384210313	897.59119431541	1328.45234870342	1132.89324948611	1016.49110471274
FBgn0000384	644.331819256591	0.615620037793941	0.17398041203787	3.53844453282442	0.000402491833069251	0.0302802682606073	614.697399712464	406.916055595928	619.634557642462	905.022703407406	838.842486541024	766.875280908789
FBgn0026206	2064.4126204602	1.19439677587503	0.337735778853476	3.53648280892744	0.000405492890750951	0.0302802682606073	2949.83413672461	1010.04104061222	1544.69182277536	4900.84916382442	4882.61034285564	2809.56477237108
FBgn0004858	275.603655466277	0.681234474910491	0.193680574951345	3.51730923496911	0.000435945580888431	0.0320271164203986	414.950469051547	263.867180944628	390.018205608287	639.797540969246	543.651991956615	526.966739141664
FBgn0004244	469.557927735789	1.23943839232215	0.3526028923504	3.51511124613935	0.000439569810554857	0.0320271164203986	828.711968277732	346.990175674437	528.447202528412	1782.12696866343	1498.74710570849	739.140189375018
FBgn0004573	115.138204532328	1.30979681196318	0.372638902518638	3.51492236347403	0.000439882565004902	0.0320271164203986	177.156503979027	67.6582515242635	129.639854258529	429.245986577549	323.68378556746	171.957567509385
FBgn0053144	1098.26863549618	0.57534138763977	0.163871039452721	3.51094000234106	0.000446525165749505	0.0322420691996151	1796.53340612289	1368.62977369082	1602.91989290843	2625.49645448652	2371.78154142917	2103.70669283659
FBgn0011206	581.96689173943	0.834376373209736	0.238153510549097	3.50352330010153	0.000459146485347035	0.0328816626432544	1013.00229120893	509.369979332669	727.301555247003	1587.86116986004	1536.35824980612	881.975910773942
FBgn0259735	1264.95228939201	0.678483774933337	0.194381946831069	3.49046702121461	0.000482177119816295	0.0342502560636989	1895.21790162798	1212.04924873466	1628.18867806051	2882.57873913053	2653.29525634172	2038.52922773223
FBgn0286028	45.7346096775069	1.2733177149768	0.366255961888909	3.4765788068264	0.000507854952063649	0.035576253511615	66.5823102203056	28.9963935103986	70.3131412927616	151.224873320004	159.562429505086	87.3655383313811
FBgn0024963	538.140636342012	0.721248984676166	0.207495090219352	3.47598096857956	0.000508988404366702	0.035576253511615	966.632468019793	626.322099824611	773.444554220378	1639.04497313758	1383.63421013696	873.655383313811
FBgn0260943	1296.89808627687	1.17290106056776	0.337644562284249	3.4737744705047	0.00051319218918753	0.0355853980708845	2148.46847443022	928.851138783103	1613.90632123542	4854.31843357212	3787.32823746715	1931.7491253272
FBgn0000711	933.264497710551	0.612994053360551	0.176620904725146	3.4706766694151	0.000519148704772533	0.0356360296320343	1243.66243732928	871.824898212652	1198.61933047505	1914.73954988251	1699.33987422917	1450.54528721626
FBgn0087007	531.799984915439	0.569744602234134	0.164231075760761	3.46916440506115	0.000522079866418724	0.0356360296320343	441.107805209524	324.759607316465	483.402846387736	682.838466452632	642.808644577633	524.193229988286
FBgn0004870	58.0761168964879	1.13462311181728	0.327943915712257	3.45980839239847	0.000540559888376594	0.0366114088740023	97.4955256797331	47.3607760669844	45.0443561406754	183.79638449662	142.466454915255	87.3655383313811
FBgn0085386	264.822696534579	1.02831405085883	0.297649879798952	3.45477730934547	0.000550747514198534	0.0368126050256223	469.643081018227	223.27223003007	366.9467061216	941.084019352946	738.546102280685	478.430328957563
FBgn0003118	230.616576210506	0.615868722590163	0.178310252956877	3.45391648756792	0.000552508440935827	0.0368126050256223	296.053486515287	211.67367262591	252.687851520862	429.245986577549	418.28151163119	313.406534331621
FBgn0051262	152.476695092413	1.14806056736598	0.332590740906746	3.45187170345153	0.000556712368527331	0.0368126050256223	14.2676379043512	11.5985574041595	12.0850711596934	41.8776572270779	27.3535593437291	12.4807911901973
FBgn0263584	65.1279948576797	1.12579819752127	0.326363569159737	3.4495216497962	0.000561580697829758	0.0368126050256223	96.3065558543705	43.494590265598	72.5104269581604	177.980043215081	176.658404094917	105.393347828333
FBgn0086675	315.745390734716	1.13874149581615	0.330625540761587	3.44420304974953	0.000572745395889105	0.0368126050256223	612.319460061739	274.49919189844	375.735848783195	1148.14576897572	1015.50089063594	612.945522896356
FBgn0019650	544.799350856029	0.443177203789413	0.128703763484753	3.44338962428178	0.000574471033556713	0.0368126050256223	970.199377495881	852.49396920572	886.604765988416	1416.8607361828	1275.35970440137	985.982504025587
FBgn0032694	854.130185390227	0.563815869363585	0.163739072985319	3.44338012353433	0.000574491217445591	0.0368126050256223	1003.49053260603	664.017411388129	859.138695170931	1459.90166166619	1298.15433718781	970.728203682012
FBgn0024321	327.352540576496	0.58804530190656	0.17094935296706	3.43988024347697	0.000581971637892583	0.0368126050256223	420.89531817836	335.391618270278	468.021846729945	699.12422204094	659.904619167463	477.043574380874
FBgn0083940	151.394594094438	0.509645292171237	0.148195128123256	3.4390151594414	0.000583834539717037	0.0368126050256223	141.487409218149	141.115781750607	149.415425247118	215.204627416928	197.173573602714	202.466168196534
FBgn0265595	277.482252212558	1.1232394064406	0.326697087550144	3.43816779899575	0.000585664655895788	0.0368126050256223	481.532779271853	217.47295132799	292.23899349804	896.879825613252	775.01751473899	483.977347264317
FBgn0031645	2135.24709235934	0.520846544113046	0.151591549520456	3.43585474098451	0.000590687586581474	0.036863124599731	2934.37752899489	2447.29561227764	3273.95564144421	4829.88980018965	3901.30140139936	3684.60691026158
FBgn0011666	1098.25159018848	0.91363683511829	0.266215265428006	3.43194757689569	0.000599263384323596	0.0369533720112352	1934.45390586495	869.891805311959	1410.65739718603	3129.19160946777	2813.99741748613	1992.7663267015
FBgn0052183	267.09220556041	0.626644148244572	0.182647543931292	3.43089282646091	0.000601598231196194	0.0369533720112352	445.863684510975	360.52182597929	408.695133764177	706.103831578786	691.817105068481	474.270065227497
FBgn0029761	569.428441441272	0.753763560784246	0.219791855762223	3.42944263412421	0.000604822272817516	0.0369533720112352	1056.99417474735	723.943291309619	778.937768383875	1822.8413576342	1528.38012833086	961.020921645192
FBgn0036835	119.454908445517	0.950206082154129	0.278002772011075	3.41797340825176	0.00063089270540473	0.0382785386605634	134.353590265974	107.286655988475	188.966567224297	368.756037249547	272.395861797969	188.598622429648
FBgn0287185	42.8040518178386	1.72587992937171	0.506426957194011	3.40795430585763	0.000654518540691862	0.0394381275174124	2.3779396507252	4.83273225173311	7.6904998288958	17.4490238446158	19.3754378684747	12.4807911901973
FBgn0243486	228.757450101336	0.73447330638042	0.21579946732396	3.40349916284929	0.00066528617227531	0.039542984547418	436.351925908074	260.967541593588	368.045348954299	697.960953784632	635.970254741701	434.054182503528
FBgn0032151	469.514537980192	1.68031398528383	0.493703349819091	3.40348913147856	0.000665310601862247	0.039542984547418	639.665766045078	253.235169990815	386.722277110189	1922.88242767666	1490.76898423323	685.056760884163
FBgn0085408	379.907163353641	0.593812860146341	0.174690609523343	3.39922599026134	0.000675768542558344	0.039893174029272	431.596046606624	332.491978919238	449.344918574055	721.226318910787	609.756427037294	496.458138454515
FBgn0264908	379.685477503626	0.884557266790298	0.260737582797509	3.3925192421426	0.000692530677225975	0.0401700734583328	740.728201200899	300.595946057799	558.110559011295	1203.98264527849	1045.13391325831	698.924306651049
FBgn0262160	3140.32564708171	0.597020038273995	0.176014187569947	3.39188588440772	0.00069413343397106	0.0401700734583328	4971.08283984103	3579.12150563354	4869.18503452374	7772.95848864819	7072.03482199328	5448.55873180946
FBgn0003435	1430.97661564892	1.07469289217729	0.316950606695048	3.39072672358472	0.00069707570459799	0.0401700734583328	2463.54547815131	931.750778134143	1571.05925076014	4535.5829313438	3707.54702271461	2213.26030439499
FBgn0013576	2685.34567045437	0.751751114518454	0.221753531120643	3.39002996127927	0.000698849853000638	0.0401700734583328	2995.01499008839	2064.54321794038	2860.86593634924	5427.80968393182	4674.0394528597	3231.13816368441
FBgn0260997	31.2163880875423	0.983254584831155	0.290339681792057	3.38656631006219	0.000707731707141677	NA	20.2124870311642	15.4647432055459	20.8742138212886	38.3878524581548	37.6111440976275	34.6688644172147
FBgn0003090	118.756596935398	0.670595554139536	0.198424400407599	3.37960227049704	0.000725907944095568	0.0412582903647867	170.022685026852	164.312896558926	179.078781730002	316.4089657157	253.020423929494	246.842314650569
FBgn0040397	490.814776225291	0.606410035549758	0.179458854570777	3.37910345521901	0.000727226361013753	0.0412582903647867	524.335692984906	397.250591092461	476.81098939154	792.185682545557	732.847444084074	600.464731706159
FBgn0001991	820.617262846703	0.73609057499965	0.218103242653851	3.37496392095321	0.000738253687023361	0.0416136933130523	1608.6761737156	847.661236953987	1298.59582825069	2399.82241276283	2180.30662602307	1669.65251033306
FBgn0011656	798.594033293124	0.688009896832077	0.204159275989368	3.36996638285447	0.000751773544541139	0.0421041375554867	1099.7970884604	724.909837759966	1121.71433218609	1748.3921892305	1718.71531209764	1275.8142105535
FBgn0052062	1111.92483927378	0.739315205248286	0.219797688316436	3.36361683742513	0.0007692826601889	0.0428103350450345	1942.77669464249	1083.49857083856	1586.44025041793	2990.76268696715	2687.48720552138	2017.7279090819
FBgn0027339	1766.0937062283	0.982699089256741	0.292605792829349	3.35844030890347	0.000783836480882537	0.0431409206115404	3720.28658355957	1305.80425441829	2273.09202085506	5544.13650956259	5263.2807103892	3612.49567227377
FBgn0020236	4443.52439614721	0.573505079485454	0.170787917990451	3.3579956137033	0.000785098589588523	0.0431409206115404	6122.00563079202	5113.99726878397	5988.70208104443	9961.06607876301	8814.68449851669	6853.34111799501
FBgn0261822	1471.65320636433	0.524179722698852	0.156347492461047	3.35265832823925	0.000800394473163304	0.043502064147859	1741.84079415621	1453.68586132132	1612.80767840272	2656.90469740683	2376.34046798646	1877.66569683635
FBgn0263019	137.677315408964	0.656649316250201	0.195884226968167	3.35223170550077	0.000801628971936054	0.043502064147859	190.235172058016	118.885213392634	126.343925760431	291.980332333238	201.732500160002	188.598622429648
FBgn0052264	1464.59683322724	0.70601314028189	0.211003392705597	3.34598003960513	0.000819922977882792	0.0441280441365036	2317.30218963171	1413.09091040676	2002.82588401101	3660.8052026004	3274.44899977223	2412.95296343814
FBgn0010415	1804.61876248146	0.583356438654436	0.174520269932046	3.34262856046224	0.000829889033203217	0.0441280441365036	2157.98023303312	1750.41562157773	2420.31016043678	3664.29500736932	3322.31772862376	2491.99797430939
FBgn0026869	1346.48777778074	0.734415227620978	0.219846737163208	3.34057824599766	0.000836041187013416	0.0441280441365036	1821.5017724555	1108.62877854757	1639.17510638751	2960.51771230315	2731.93673945494	1905.40078837012
FBgn0264357	2186.37905657883	0.500946058000685	0.149984669694757	3.33998173960172	0.000837838986746556	0.0441280441365036	2760.78793449196	2035.54682442998	2720.23965376372	4005.13260646748	3493.27747452206	3134.06534331621
FBgn0040571	70.3260181145927	1.06153300712637	0.317844239680481	3.33978998075755	0.000838417686466705	0.0441280441365036	117.708012710897	67.6582515242635	105.469711939142	260.572089412929	198.313305242036	145.609230552302
FBgn0039406	699.02284857902	-0.560122773659963	0.167933444101334	-3.3353854954703	0.000851812258765296	0.0445645730828287	546.926119666796	599.258799214905	507.572988707123	345.490672123393	388.648489008817	388.291281472805
FBgn0000360	4134.18819426354	4.47735541513247	1.34342423132149	3.33279340266791	0.000859787613371873	0.0447140736787503	0	0	0	11.6326825630772	0	1.38675457668859
FBgn0037315	906.775775678804	0.297312641586784	0.0892874888490956	3.32983540492745	0.000868973354272462	0.0449037538799597	1062.93902387416	1016.80686576465	1096.445547034	1420.35054095173	1375.65608866171	1099.69637931405
FBgn0034246	1336.12518170571	0.396306711688171	0.119107510110988	3.32730246244657	0.000876911365037575	0.0449037538799597	1217.5051011713	1079.63238503718	1410.65739718603	1760.02487179358	1734.67155504815	1379.82080380515
FBgn0037720	875.445183470655	0.590955845989597	0.17764100421363	3.32668602390312	0.000878853372264291	0.0449037538799597	1225.82788994884	962.680264545235	1144.78583167278	1940.33145152128	1756.32645619527	1320.19035700754
FBgn0003091	525.968444764461	0.860429433070899	0.258864864619706	3.32385561221273	0.000887821495716303	0.045098234930659	854.869304435709	516.135804485096	794.318768041666	1549.47331740188	1380.215015219	998.463295215784
FBgn0038063	731.061208229263	0.797908001545955	0.240178184487922	3.32215019131382	0.000893265979479551	0.0451125136572997	1116.44266601548	678.515608143328	1048.10526239523	2034.5561802822	1724.41397029425	1180.12814476199
FBgn0036833	100.412792307975	-2.70366915210105	0.814770952831455	-3.31831804104623	0.000905613050121865	0.0451425349895302	49.9367326652292	20.297475457279	57.1294273003688	2.32653651261544	10.2575847538984	6.93377288344294
FBgn0264002	58.0901141004058	1.10418384572373	0.33302804134858	3.3155882046821	0.000914504762859741	0.0451425349895302	79.6609782992942	33.8291257621317	69.2144984600622	159.367751114158	133.348601800679	97.0728203682012
FBgn0042185	382.969511048051	0.686253491623532	0.207001482657573	3.31521051353409	0.000915741342290666	0.0451425349895302	292.486577039199	183.643825565858	310.91592165393	518.817642313243	401.185537041359	342.528380442081
FBgn0260964	658.760461765166	0.651005678004474	0.196378777669259	3.31505107492266	0.000916263817121668	0.0451425349895302	1339.96899318365	750.040045468978	1040.41476256633	1897.29052603789	1690.22202111459	1322.96386616091
FBgn0004396	204.761036192774	0.711671855982299	0.214902561032981	3.31160248887438	0.000927632540196555	0.0451425349895302	196.180021184829	168.179082360312	199.952995551291	332.694721304008	339.640028517969	249.615823803946
FBgn0262737	2887.0591798558	0.839268490479437	0.253451912895674	3.31135196768035	0.000928463487815889	0.0451425349895302	3827.29386784221	2280.08307636768	3373.93213921986	7040.09948717432	6090.725880537	3828.82938623719
FBgn0085382	228.483307880794	1.27612749384695	0.385434443078314	3.31088079117947	0.00093002819023869	0.0451425349895302	334.10052092689	133.383410147834	283.449850836445	815.451047671712	650.786766052887	349.462153325524
FBgn0261588	441.154255724849	1.00007385112768	0.302667746661752	3.30419696897973	0.000952488858809116	0.0459773213227362	728.838502947273	378.886208535876	631.719628802155	1480.84049027973	1257.12399817221	737.753434798329
FBgn0263257	572.962504521634	0.740902899123454	0.224629216699057	3.29833718877302	0.000972592642092665	0.0466227547149296	1024.89198946256	741.341127415859	898.68983714811	1708.84106851604	1599.04348996883	1142.6857711914
FBgn0039908	1108.7928603719	0.767909315118736	0.232897262190232	3.29720198467383	0.000976532461123052	0.0466227547149296	1765.62019066346	1128.92625400485	1622.69546389701	2798.82342467637	2782.08493158511	2107.86695656665
FBgn0053181	344.847739419068	0.870547245447977	0.264152261667643	3.29562669633055	0.000982024115341519	0.046630134215972	360.257857084868	205.87439392383	328.494206977121	657.246564813862	548.210918513903	427.120409620085
FBgn0286778	2436.875192461	0.649356434978899	0.197529762503526	3.28738528689977	0.00101122378181231	0.0477570928740225	3000.9598392152	2130.26837656395	2864.16186484734	4811.27750808873	4441.53419843801	3283.83483759858
FBgn0260003	2368.36880449734	0.684370595636192	0.208676107699239	3.27958290568925	0.0010396065952684	0.0488160638492501	2872.55109807604	1978.52058385953	2791.65143788918	5063.70671970751	4073.40087893699	3140.99911619965
FBgn0087002	128041.844041949	1.13692425700389	0.346816656522058	3.27817085951172	0.00104482132766508	0.0488160638492501	174516.990966722	93697.0128966015	174917.122679737	377842.325599567	395441.289579176	201209.768550054
FBgn0266350	91.5140776154633	1.00953741275185	0.308198112167496	3.27561192913214	0.00105433326269327	0.0489984559369739	60.6374610934926	53.1600547690642	72.5104269581604	145.408532038465	107.134774096272	122.034402748596
FBgn0050438	121.714794109364	0.461836450505129	0.141317287366117	3.26808176913719	0.00108279077682138	0.0500547249581396	199.746930660917	176.878000413432	195.558424220493	266.388430694468	308.867274256274	208.013186503288
FBgn0031011	487.426284865956	0.527891528652376	0.161704233176969	3.26454984066282	0.00109638171846252	0.0504162477589844	643.232675521166	484.239771623657	651.495199790744	924.798263764638	869.61524080272	766.875280908789
FBgn0259214	4296.87141734732	0.605825479464566	0.185798782735478	3.26065365200524	0.00111155724079659	0.0507201210483549	5424.08034330418	3407.07623747184	5226.24395515105	7642.67244394172	7404.83646067532	6341.62867919692
FBgn0036995	124.062737224971	0.713683964211694	0.218929635392145	3.25987828433255	0.0011146003480925	0.0507201210483549	154.566077297138	202.97475457279	190.065210056996	342.00086735447	313.426200813562	242.682050920503
FBgn0051198	1813.97292307122	3.51866109923686	1.08005787603541	3.25784495193246	0.00112261725026161	0.0508202430856771	0	1.93309290069324	1.0986428326994	33.7347794329239	2.27946327864409	0
FBgn0031948	387.801731516214	0.312300818615616	0.0959742007835683	3.25400801534035	0.00113789069172706	0.0512461390392749	496.989387001567	559.630394750694	589.971201159578	720.063050654479	666.743009003396	658.70842392708
FBgn0005640	1027.55995993734	0.786819235045762	0.241938984123963	3.25213912050907	0.00114539943986034	0.0513197687490248	1363.7483896909	786.76881058215	1117.31976085529	2382.37338891821	1960.33841963392	1291.06851089708
FBgn0041111	833.544476895511	0.74366713025086	0.229054678993654	3.24667949817984	0.00116759794576462	0.0519529595678926	1127.14339444374	678.515608143328	1031.62561990474	1917.06608639512	1575.10912554306	1255.01289190317
FBgn0016977	3451.49879917568	0.696841585669079	0.214780036018914	3.24444300590262	0.00117680565122656	0.0519529595678926	4188.74069475244	3068.78497985052	3918.85898423876	7208.77338433894	6404.15208135056	4500.01860135447
FBgn0267228	49.5400458847031	0.916882775249694	0.282612885510898	3.24430633653587	0.00117737049266828	0.0519529595678926	60.6374610934926	27.0633006097054	58.2280701330682	112.837020861849	91.1785311457635	67.9509742577408
FBgn0033544	670.583352164341	0.277308935776068	0.0857122030289616	3.23534952989561	0.00121493902947429	0.0533413180930497	725.271593471186	723.943291309619	710.821912756512	967.839189248023	857.078192770177	789.063354135807
FBgn0264273	228.513392884569	0.568191221423285	0.175799755554099	3.23203647031485	0.0012291136793473	0.0536938310822868	386.415193242845	286.0977493026	337.283349638716	601.409688511091	528.835480645428	361.942944515722
FBgn0261239	476.125535240486	0.619500149631856	0.191982375108611	3.22685949312474	0.00125156902399381	0.0544027789185769	481.532779271853	295.763213806066	508.671631539822	741.001879268018	697.515763265091	532.513757448418
FBgn0003016	885.707019772062	0.610284096715248	0.189242043041429	3.224886430663	0.00126022650803338	0.0545079158449884	1156.86764007781	818.664843443588	1182.13968798455	1726.29009236066	1625.25731767323	1465.79958755984
FBgn0039955	1825.57937967613	0.462558375346544	0.14354965808091	3.22228824178619	0.00127171129775772	0.0547337025049714	1247.22934680537	923.051860081023	1161.26547416327	1550.63658565819	1624.11758603391	1411.71615906898
FBgn0050463	623.602582334434	0.733831302769313	0.22787866198898	3.22027212361288	0.00128068965089203	0.0548499288227633	514.823934382006	307.361771210226	474.613703726141	804.981633364942	780.7161729356	567.182621865633
FBgn0263980	706.754091935429	0.684666380103448	0.212918308811139	3.2156294304909	0.0013015878573237	0.0554730395582299	1166.37939868071	806.099739589082	981.088049600565	2041.53578982005	1624.11758603391	1077.50830608703
FBgn0260941	538.600246378118	0.712004827511786	0.221663831920682	3.21209293073379	0.00131771743021242	0.055887850426048	727.649533121911	489.07250387539	694.342270266021	1205.1459135348	1100.98076358509	820.958709399644
FBgn0000636	725.402060567519	0.454774814438179	0.141739631963044	3.20852261389216	0.00133418816596709	0.0559089238295591	808.499481246567	648.552668182583	772.345911387678	1158.61518328249	1040.57498670103	851.467310086793
FBgn0267337	46.3547322985905	0.966695212333581	0.301337780160186	3.20801199179108	0.00133655925413763	0.0559089238295591	89.1727369021949	41.5614973649047	61.5239986311664	157.041214601542	118.532090489493	97.0728203682012
FBgn0002868	2640.96347984367	-0.492972553991285	0.153677957585395	-3.20782864203119	0.00133741159212291	0.0559089238295591	3374.29636437906	3382.91257621317	2600.48758499948	2111.33188519851	1970.59600438781	2569.65623060395
FBgn0052373	345.095811806561	0.521445397189377	0.162724119992735	3.20447513996485	0.00135308974948986	0.0559291104554836	428.029137130536	338.291257621317	408.695133764177	616.532175843092	589.241257529497	477.043574380874
FBgn0260991	300.088371354378	-2.14967175150808	0.670937446786311	-3.20398237094186	0.00135540775780831	0.0559291104554836	5.944849126813	3.86618580138648	28.5647136501844	2.32653651261544	2.27946327864409	4.16026373006577
FBgn0032957	344.081407459892	0.648387574586498	0.202440224826979	3.20285938795345	0.00136070401443872	0.0559291104554836	527.902602460994	358.588733078596	451.542204239454	777.063195213557	732.847444084074	583.823676785896
FBgn0262608	2031.07796423623	-1.69163433346833	0.528261299903745	-3.20226814604168	0.00136350011754813	0.0559291104554836	52.3146723159544	38.6618580138649	119.752068764235	17.4490238446158	13.6767796718645	34.6688644172147
FBgn0263077	1795.94004799295	0.57907587149293	0.180962787230361	3.19997210672812	0.00137440888180833	0.0561131327119597	2520.61602976871	2233.68884675104	2907.00893532261	4748.46102224811	3582.17654238918	3111.87727008919
FBgn0001269	44.0618844166365	0.724014323089336	0.22636834472791	3.19839032246132	0.00138197090036825	0.0561594407279877	70.1492196963934	53.1600547690642	61.5239986311664	123.306435168618	100.29638426034	79.0450108712495
FBgn0265998	1224.21194228145	0.388331737549189	0.121725129905928	3.19023473500748	0.0014215727742332	0.0573971651681467	1291.22123034378	1206.24997003258	1385.38861203394	1819.35155286527	1784.81974717832	1474.12011501997
FBgn0262593	485.672478664315	1.06539690075592	0.334172337230499	3.18816605104284	0.00143178288649509	0.0573971651681467	816.822270024106	391.451312390382	613.042700646265	1716.9839463102	1368.81769882577	722.499134454755
FBgn0038881	620.471124841599	0.74400739418687	0.233370556800341	3.18809452395232	0.00143213711876571	0.0573971651681467	1026.08095928792	602.158438565945	896.492551482711	1683.24916687727	1532.93905488815	1008.1705772526
FBgn0011582	223.031845372348	1.05154246166251	0.33031018549317	3.1834999580546	0.00145506134400472	0.0580496390984896	399.493861321833	180.744186214818	283.449850836445	780.55299998248	596.079647365429	410.479354699822
FBgn0011259	569.468878031452	0.999659100162536	0.314184242488974	3.1817607790996	0.00146382672672753	0.0581338823246293	935.719252560366	465.875389067071	742.682554904795	1779.80043215081	1509.00469046239	995.689786062407
FBgn0020378	92.6241713852817	0.792634841566338	0.24938480174291	3.17836065400434	0.00148110392233845	0.058453261500653	154.566077297138	102.453923736742	147.21813958172	326.878380022469	211.9900849139	158.090021742499
FBgn0287478	477.115388869122	0.788460018079393	0.248134553857292	3.17755026787948	0.00148524940518999	0.058453261500653	662.256192726968	404.982962695234	557.011916178596	1050.43123544587	1048.55310817628	703.084570381114
FBgn0052221	192.55321709771	-0.541517625993887	0.170773763556569	-3.17096499319411	0.00151933451482121	0.0595265724483988	180.723413455115	231.971148083189	163.697782072211	134.939117731696	125.370480325425	137.28870309217
FBgn0000153	756.635428072264	-0.5010584261156	0.15838983862408	-3.16345057529103	0.00155910822566362	0.0608121811054599	1393.47263532497	1545.50777410425	1282.1161857602	866.634850949252	893.549605228482	1225.89104579271
FBgn0267001	1315.94250882799	1.06908910311892	0.33859058480587	3.15746849172393	0.00159145434409337	0.0614825728797927	2326.81394823461	940.449696187262	1821.54981661561	4483.23585980995	3871.66837877698	2318.65365222332
FBgn0264753	196.443769888483	0.545105506616973	0.172643680056204	3.15740203429118	0.00159181713506828	0.0614825728797927	362.635796735593	260.000995143241	301.028136159636	531.613593132628	467.289972122038	343.91513501877
FBgn0285963	623.854209674259	0.523623489811749	0.165893687220681	3.15637983930755	0.00159740689524012	0.0614825728797927	871.514881990785	599.258799214905	867.927837832526	1221.43166912311	1135.17271276476	1001.23680436916
FBgn0024989	62.2637580648034	0.977114157039483	0.309800014778	3.15401585032098	0.00161040339058615	0.061710940454172	108.196254107997	33.8291257621317	92.2859979467496	167.510628908312	143.606186554578	146.99598512899
FBgn0005391	188358.604112894	0.469614519889246	0.149004327364769	3.15168376781171	0.0016233197753512	0.0618376196801186	273461.870863572	229682.366088768	281504.154379735	377005.935723282	403368.123130661	306155.194650116
FBgn0265002	296.252998204168	0.899134024923703	0.285360807292925	3.15086725978012	0.00162786454462943	0.0618376196801186	485.09968874794	272.566098997747	450.443561406754	958.533043197561	798.951879164753	492.297874724449
FBgn0004369	611.056914316171	0.759112885025737	0.241090637131624	3.14866182302757	0.00164019883186207	0.0620364380691726	970.199377495881	586.693695360399	731.696126577801	1612.2898032425	1384.77394177628	872.268628737122
FBgn0004509	1520.67919132082	0.641131624721799	0.203885922921282	3.14456052451121	0.00166336499804899	0.0620645069276548	2066.4295564802	1403.42544590329	2006.12181250911	3258.31438591792	2870.98399945223	2407.40594513139
FBgn0264270	1973.50662699713	0.607607738915669	0.19330039885089	3.14333411895529	0.00167035058962199	0.0620645069276548	2474.24620657957	1481.71570838137	2101.70373895395	3482.82515938531	3152.49771436477	2590.45754925428
FBgn0013684	7406.95058575029	-0.853931392812975	0.271722974882738	-3.14265436399512	0.00167423408181216	0.0620645069276548	7977.98752818304	19752.3432592836	9938.32306459878	7577.52942158849	5722.59256103598	7542.55814260923
FBgn0037698	447.261743911381	1.04822874204857	0.333776318626329	3.14051262343176	0.00168652439053831	0.0620645069276548	806.121541595842	318.960328614385	631.719628802155	1483.16702679234	1299.29406882713	847.307046356728
FBgn0033696	86.793902751447	0.571102853971561	0.181876720134133	3.14005472250861	0.00168916278556309	0.0620645069276548	137.920499742062	100.520830836049	129.639854258529	197.755603572312	173.239209176951	173.344322086074
FBgn0000114	3640.98856932747	0.716530743869328	0.228245937590164	3.13929242918629	0.00169356349251726	0.0620645069276548	1583.70780738298	948.182067790035	1580.94703625444	2690.63947683976	2358.10476175731	1705.70812932696
FBgn0051774	224.863309785831	1.11669556917874	0.355818526962013	3.13838511646124	0.00169881513935806	0.0620645069276548	366.202706211681	160.446710757539	332.888778307918	821.26738895325	654.205960970853	385.517772319428
FBgn0051481	53.7629678952098	0.706534699685989	0.225201763394347	3.13734088506576	0.00170487782774889	0.0620645069276548	76.0940688232064	85.0560876305027	104.371069106443	176.816774958773	147.025381472544	108.16685698171
FBgn0262975	2956.86873948863	0.490971926536596	0.156547725827441	3.13624438771971	0.00171126538051148	0.0620645069276548	3763.08949727263	2912.20445489437	3918.85898423876	5533.66709525583	5085.48257465496	4265.6570778941
FBgn0260486	743.080780802303	0.522713975085161	0.166675246718332	3.13612240195754	0.00171197735716663	0.0620645069276548	1065.31696352489	785.802264131803	1011.85004891615	1594.84077939788	1376.79582030103	1137.13875288464
FBgn0004242	1577.04523827853	0.851055207187545	0.271831048116026	3.13082413905966	0.00174316512259665	0.0629340234550698	3078.24287786377	1541.64158830286	2404.92916077899	5262.62559153613	4544.11004597699	2860.87469170856
FBgn0265276	328.341754521581	0.758543278562334	0.24286128193634	3.12336026769869	0.00178798741922095	0.0641735061664925	489.855568049391	316.060689263345	515.263488536019	941.084019352946	756.781808509837	533.900512025107
FBgn0263235	87.0881178256145	-2.82456285838542	0.904534584589142	-3.12266983099202	0.00179218673510635	0.0641735061664925	5.944849126813	3.86618580138648	16.479642490491	0	2.27946327864409	1.38675457668859
FBgn0040238	621.176117718074	0.294899352985645	0.0947501952009873	3.11238781471737	0.00185580532545454	0.0661202910038589	457.753382764601	543.199105094801	560.307844676694	625.838321893553	661.044350806785	630.973332393308
FBgn0001235	1166.34546847208	0.782765043650223	0.251622339186686	3.11087261242518	0.00186535390514687	0.0661202910038589	1864.30468616856	1186.91904102565	1780.90003180573	3221.08980171608	3040.80401371121	2048.23650976905
FBgn0053977	82.5191010212422	-0.795246444341858	0.255774260090915	-3.10917308121305	0.00187611778823728	0.0661202910038589	86.7947972514697	140.14923530026	97.7792121102466	44.2041937396934	59.2660452447463	85.9787837546925
FBgn0031016	582.032992277317	0.753415089156836	0.24232878184326	3.10906151314766	0.00187682638994586	0.0661202910038589	760.940688232064	465.875389067071	698.736841596819	1269.12566763172	1118.07673817493	855.627573816859
FBgn0001323	79.0509276901933	0.600252926403624	0.193158976884377	3.10755904843568	0.00188639296484039	0.0661445068463361	130.786680789886	91.821912782929	140.626282585523	203.571944853851	194.89411032407	148.382739705679
FBgn0003255	38.9317799957737	0.720736582493165	0.232125671904095	3.10494128710997	0.00190316798425305	0.0661445068463361	59.44849126813	41.5614973649047	58.2280701330682	103.530874811387	95.7374577030517	59.6304467976093
FBgn0259110	749.213309982055	0.954150246340392	0.307304426893674	3.10490237965404	0.00190341833928354	0.0661445068463361	1474.32258344962	657.251586235702	1068.97947621652	2448.67967952775	2237.29320798917	1511.56248859056
FBgn0085397	134.453257373309	0.83875839116956	0.270199161762529	3.10422277292897	0.00190779623729847	0.0661445068463361	197.368991010191	131.450317247141	210.939423878285	383.878524581548	356.7360031078	221.880732270174
FBgn0023526	328.498282704448	0.643410000456522	0.207478759729791	3.10108852248039	0.00192810640184446	0.0665844491419567	204.502809962367	149.814699803726	202.15028121669	314.082429203084	290.631568027121	262.096614994143
FBgn0000568	1217.86061307784	0.634366862462091	0.204864756571441	3.09651534543411	0.00195809726786343	0.0670087421858676	1993.90239713308	1249.74456029818	1674.33167703389	2936.08907892069	2709.1421066685	1984.44579924137
FBgn0086779	854.012382964434	0.410819643546502	0.132674597361232	3.09644537626118	0.00195855943351216	0.0670087421858676	667.012072028418	596.359159863865	643.804699961849	1002.73723693725	830.86436506577	697.53755207436
FBgn0031080	61.5704755840869	-0.669589092980148	0.216362491215766	-3.09475588498565	0.00196974943637506	0.0670087421858676	116.519042885535	165.279443009272	103.272426273744	77.9389731726173	82.0606780311872	83.2052746013153
FBgn0038806	200.240749269627	-0.498573174999274	0.161112942476579	-3.09455694455926	0.00197107093301682	0.0670087421858676	168.833715201489	215.539858427297	149.415425247118	124.469703424926	119.671822128815	135.901948515482
FBgn0039904	1488.88247416669	0.450194964496568	0.145586496199844	3.09228517924213	0.00198621935001542	0.067262009539088	1353.04766126264	1074.79965278544	1379.89539787045	1867.04555137389	1797.35679521086	1533.75056181758
FBgn0052069	70.3590706546589	-0.738028137915658	0.238844471225417	-3.08999464852222	0.00200160101722081	0.0674425017028584	59.44849126813	76.3571695773831	65.918569961964	30.2449746640007	41.0303390155936	51.3099193374778
FBgn0263352	1876.14069031149	0.802964441298617	0.259926645470689	3.08919633785357	0.00200698757499636	0.0674425017028584	1876.19438442218	953.981346492115	1340.34425589327	2955.86463927792	2749.03271404477	1567.03267165811
FBgn0037989	357.664879882789	0.668606869379549	0.216658424348908	3.08599525446017	0.00202872059976437	0.067911616399009	549.304059317521	418.514613000087	598.760343821173	1005.06377344987	826.305438508482	655.934914773702
FBgn0051191	58.7452481739611	1.1863271614904	0.385419891423357	3.07801228709108	0.00208386322774734	0.0692934797077155	85.6058274261072	39.6284044642115	83.4968552851544	194.265798803389	174.378940816273	104.006593251644
FBgn0287724	274.964938640987	0.843889616374811	0.27465364494152	3.07255931940934	0.00212231646968189	0.0692934797077155	498.178356826929	240.670066136309	383.426348612091	809.634706390173	729.428249166108	471.49655607412
FBgn0250867	474.64154663643	0.921548447691852	0.29992926660902	3.07255259918719	0.00212236425818438	0.0692934797077155	676.523830631319	341.190896972357	586.67527266148	1265.6358628628	1039.4352550617	730.819661914886
FBgn0028509	812.277387060881	0.433698027205434	0.14124384527172	3.07056230571393	0.00213656103321763	0.0692934797077155	1121.19854531693	799.333914436656	1106.3333325283	1480.84049027973	1391.61233161222	1210.63674544914
FBgn0052451	2303.30729181083	0.514855457997047	0.167690276426146	3.07027616013144	0.00213860925553393	0.0692934797077155	3159.09282598843	2257.85250800971	3108.0605737066	4636.78726964257	4295.64854860478	3243.61895487461
FBgn0036254	185.876177908286	0.66430883726855	0.216407043198821	3.06971911564923	0.0021426017295984	0.0692934797077155	46.3698231891414	56.059694120104	68.1158556273628	105.857411324003	99.1566526210178	63.7907105276751
FBgn0083963	401.482586248265	1.040115141398	0.338896533007048	3.06912299210913	0.00214688186179721	0.0692934797077155	721.704683995098	308.328317660572	597.661700988474	1440.12610130896	1203.55661112408	700.311061227737
FBgn0003513	58.8792982001763	0.661561168316611	0.215565746061148	3.0689531171105	0.00214810298883227	0.0692934797077155	84.4168576007445	94.7215521339689	125.245282927732	181.469847984004	152.724039669154	146.99598512899
FBgn0031736	458.676772659063	0.654495571438164	0.21329359366613	3.06851959399517	0.00215122220711712	0.0692934797077155	548.115089492158	289.963935103986	462.528632566448	796.838755570788	667.882740642718	578.276658479141
FBgn0032728	143.656956841808	0.522534826001189	0.17029722283131	3.06836962643127	0.0021523021968368	0.0692934797077155	82.0389179500194	78.2902624780763	82.398212452455	120.979898656003	133.348601800679	91.5258020614469
FBgn0086655	415.113822511483	0.827751633422417	0.269917951919617	3.06667869823244	0.00216451384536035	0.0692934797077155	401.871800972559	272.566098997747	438.358490247061	828.246998491097	664.463545724752	479.817083534252
FBgn0052843	114.511976183249	0.583310898053745	0.190294062571512	3.065313179882	0.00217442175241053	0.0692934797077155	165.266805725401	108.253202438822	150.514068079818	222.184236954775	238.203912618307	170.570812932696
FBgn0033494	232.269328270676	0.480280477409576	0.156701172787832	3.06494500880259	0.00217710022909642	0.0692934797077155	325.777732149352	238.736973235615	310.91592165393	500.20535021232	411.443121795258	303.699252294801
FBgn0264006	515.159459663887	1.02000376551712	0.332855421683718	3.06440484086914	0.00218103547208673	0.0692934797077155	1001.11259295531	480.373585822271	675.665342110131	1962.43354839112	1528.38012833086	880.589156197254
FBgn0010473	466.441896684256	0.885793952523964	0.289364307670858	3.06117212469591	0.00220472311781183	0.0695659313735579	865.570032863972	399.183683993155	625.127771805959	1421.51380920803	1309.55165358103	757.167998871969
FBgn0052369	508.215036748594	0.427075996917218	0.139518905611525	3.06106183276956	0.00220553542296847	0.0695659313735579	802.554632119755	632.12137852669	781.135054049274	1026.00260206341	1053.11203473357	895.843456540828
FBgn0024957	2797.44493073348	0.50202311660599	0.164124405801713	3.05879624760079	0.00222228236920994	0.0698202867534269	3506.27201499431	3076.5173514533	3654.08606155821	5715.13694323983	5066.10713678649	3712.34200179535
FBgn0285879	277.774382859164	0.442092463122279	0.144577964042448	3.05781358902302	0.00222958223694702	0.0698202867534269	462.509262066051	407.882602046274	542.729559353504	721.226318910787	655.345692610175	539.447530331861
FBgn0053547	496.112925242565	0.915491872493222	0.29967329366542	3.05496649800016	0.00225085663698868	0.0702347658477505	908.372946577026	500.67106127955	666.876199448536	1654.16746046958	1449.73864521764	808.477918209447
FBgn0266756	1114.77368424898	0.404566867269544	0.132616433315616	3.05065410940972	0.00228343462824768	0.0709977521245549	1861.92674651783	1424.68946781092	1818.25388811751	2459.14909383452	2352.4061035607	1940.06965278734
FBgn0030258	371.189478952018	-0.56691786398369	0.185942273300326	-3.04889175506653	0.00229687224697845	0.0711623149711017	743.106140851625	989.74356515494	680.059913440929	493.225740674473	500.342189662377	637.907105276751
FBgn0032136	8944.28044333888	0.773233196952833	0.253742475532312	3.0473147837417	0.00230895771981626	0.0712839703110765	11278.5677633896	9038.17585719126	14042.8526875637	24037.7752483427	19919.0898604314	14764.7759780034
FBgn0034086	149.071172065023	-0.618174223673363	0.203222386184495	-3.04186086621458	0.00235120545833435	0.0723326834136169	76.0940688232064	92.7884592332756	87.891426615952	63.9797540969246	56.9865819661022	45.7629010307234
FBgn0000464	203.602463955545	0.863421424392066	0.284094804912117	3.03920173640331	0.00237205954618457	0.0727181903684722	354.313007958055	168.179082360312	288.943064999942	606.062761536322	518.57789589153	348.075398748836
FBgn0000567	476.676761377676	0.49181549253653	0.161991597433725	3.03605557527602	0.00239695179379305	0.0730474706426102	721.704683995098	552.864569598267	727.301555247003	1106.26811174864	912.925043096957	791.836863289184
FBgn0012034	8005.40744810052	0.479674847080618	0.158009593745433	3.03573242428188	0.00239952204125319	0.0730474706426102	13346.1862896952	11000.2651513949	12035.6322322219	18611.1288326672	18974.2523314334	13142.2731232778
FBgn0263049	245.190675976035	0.526537411881701	0.173528461134975	3.03430001302291	0.00241094542115616	0.0731403824466714	401.871800972559	300.595946057799	386.722277110189	613.042371074169	528.835480645428	422.96014589002
FBgn0039594	1158.8689140187	0.398304722928296	0.131654509976118	3.02537849254498	0.00248322159248553	0.0748709367653478	2190.08241831791	1621.86494368163	1794.08374579812	2793.00708339484	2492.59309519731	2096.77291995315
FBgn0259745	1170.88181116768	0.93822910551493	0.310143383539979	3.02514628816509	0.00248512895295306	0.0748709367653478	324.58876232399	173.011814612045	307.619993155832	620.021980612015	566.446624743056	353.62241705559
FBgn0031214	27.2748711035929	0.903820441037461	0.298771110121474	3.02512662844138	0.00248529050230683	NA	40.4249740623284	25.1302077090122	48.3402846387736	63.9797540969246	90.0387995064415	56.8569376442321
FBgn0031150	450.622584998671	0.497163204654018	0.164402155918768	3.02406742706992	0.00249400846799517	0.0748802473707003	608.752550585651	426.24698460286	596.563058155774	845.696022335713	796.672415886109	655.934914773702
FBgn0033405	102.803804888462	1.0938417367348	0.362178171960092	3.02017576270534	0.00252628035613211	0.0754082906024703	179.534443629753	67.6582515242635	146.11949674902	380.388719812625	275.815056715935	180.278094969517
FBgn0264694	500.870938798735	-0.470731185716388	0.15587812182923	-3.01986693316777	0.00252885763380151	0.0754082906024703	230.660146120344	260.000995143241	213.136709543684	168.673897164619	162.981624423052	177.504585816139
FBgn0024734	303.62480374391	0.524467330004112	0.173867066255097	3.01648461264432	0.00255724196609377	0.0756638280779933	338.856400228341	212.640219076257	264.772922680555	399.001011913548	417.141779991868	353.62241705559
FBgn0005775	351.655418941357	1.13766855104363	0.377205988813671	3.01604053165128	0.00256099024105717	0.0756638280779933	589.729033379849	249.368984189428	470.219132395343	1229.57454691726	1031.45713358645	617.105786626422
FBgn0083950	667.898327323963	0.871281672661078	0.288954424235137	3.0152909925756	0.00256732813985926	0.0756638280779933	1216.31613134594	612.790449519758	956.917907281178	2186.94432185851	1846.36525570171	1059.48049659008
FBgn0036454	2082.47373610834	0.579501497815917	0.192291340878229	3.01366403276003	0.00258113465525035	0.0756638280779933	3759.52258779654	2752.72429058718	3499.17742214759	5580.19782550813	5119.67452383462	4257.33655043397
FBgn0261804	493.93608413259	1.1237828628454	0.373078492803289	3.01218881421269	0.00259371213619865	0.0756638280779933	828.711968277732	341.190896972357	677.86262777553	1713.49414154127	1497.60737406917	812.638181939513
FBgn0010113	729.220284807102	0.721472598670236	0.239551496908868	3.01176410074659	0.00259734355113501	0.0756638280779933	842.979606182083	520.001990286482	675.665342110131	1319.14620265295	1155.68788227255	883.362665350631
FBgn0000536	2062.33214932545	0.370640583587325	0.123067646699946	3.0116817337947	0.00259804834879226	0.0756638280779933	2892.7635851072	2488.85710964255	2871.85236467623	3750.37685833609	3812.40233353224	3103.55674262906
FBgn0030501	158.862489425314	-3.8405687679296	1.27808432989708	-3.00494159742875	0.0026563184887047	0.0771038359993785	1.1889698253626	3.86618580138648	4.3945713307976	0	0	0
FBgn0011260	730.625298131897	0.464039521807308	0.15449257261009	3.00363644651354	0.00266773895357556	0.077178924627118	473.209990494315	416.581520099394	489.994703383933	695.634417272017	647.367571134921	557.475339828813
FBgn0020294	213.575097022867	0.595312279278105	0.198391546152138	3.00069378370379	0.0026936529705256	0.0776714389553868	366.202706211681	234.870787434229	336.184706806016	540.91973918309	492.364068187123	378.583999435985
FBgn0031530	234.065668380647	0.68327043562008	0.228659410440057	2.9881579520612	0.00280664463212765	0.0802073415273208	357.879917434142	263.867180944628	379.031777281293	651.430223532323	550.490381792547	402.158827239691
FBgn0085370	1239.19759558825	0.610946337990395	0.204530105086331	2.98707291883763	0.00281662531914516	0.0802073415273208	1659.80187620619	1208.18306293328	1641.3723920529	2680.17006253299	2346.70744536409	1856.86437818602
FBgn0014135	84.6429314289125	0.532620983781502	0.178390064657112	2.98570990937902	0.00282920889918202	0.0802073415273208	112.952133409447	104.387016637435	114.258854600738	188.449457521851	148.165113111866	141.448966822236
FBgn0040765	322.330276968857	0.579159425881039	0.194002976221718	2.98531206665171	0.0028328915305394	0.0802073415273208	441.107805209524	337.324711170971	447.147632908656	682.838466452632	600.638573922717	544.994548638615
FBgn0028331	1884.2229220801	0.232223042453423	0.0777964192962074	2.9850093944458	0.00283569614694321	0.0802073415273208	1961.80021184829	1780.37856153848	1979.75438452432	2317.23036656498	2172.32850454782	2228.51460473856
FBgn0085412	886.411343796459	0.574941799331742	0.192616555351494	2.98490333960425	0.0028366794702921	0.0802073415273208	1616.99896249313	975.245368399741	1515.02846629247	2269.53636805636	2188.28474749832	1655.78496456617
FBgn0033246	9799.86257429983	0.617430006978726	0.206978992198172	2.98305639824339	0.00285385401060923	0.0804326531957834	15342.466626479	11054.3917526143	14869.0320977537	24289.0411917052	23322.328535447	15692.5147898081
FBgn0000535	241.968876940556	0.866825936348876	0.290803913944272	2.98079184902233	0.00287504138788448	0.0806455648146816	432.785016431986	254.201716441161	337.283349638716	834.063339772635	631.411328184412	399.385318086314
FBgn0038740	450.401542706043	0.554338880906902	0.186047840275352	2.97955020647634	0.00288671919125616	0.0806455648146816	293.675546864562	230.038055182496	293.33763633074	419.939840527087	368.13331950102	410.479354699822
FBgn0028398	136.169631278057	-0.517163929684131	0.173607163368809	-2.9789319729018	0.00289254988725715	0.0806455648146816	129.597710964523	152.714339154766	138.428996920124	102.367606555079	88.8990678671194	104.006593251644
FBgn0261836	17315.9664995525	0.725116742317937	0.243479923255277	2.97813771510716	0.00290005648274689	0.0806455648146816	22906.6926554358	17547.6508060429	24955.6719447669	49686.6770316717	34594.274448342	23841.0846824302
FBgn0261788	2103.18073245012	0.79409600172566	0.266712735865931	2.97734564173505	0.00290756013696059	0.0806455648146816	3535.99626062837	2293.61472667253	3378.32671055066	6907.48690595524	5629.13456661157	3426.6705589975
FBgn0259170	1126.31046376339	0.640319788137688	0.215311675537014	2.97392041811319	0.00294021319661788	0.081293173097628	1355.42560091336	866.992165960919	1416.15061134953	2133.43398206836	1985.412515699	1549.00486216115
FBgn0011817	367.572186861555	0.869783146551148	0.292848753474666	2.9700763149275	0.00297725777237972	0.0820577323573552	457.753382764601	208.77403327487	352.664349296508	808.471438133866	670.162203921362	379.970754012673
FBgn0264494	1533.83843806451	0.408623226328989	0.137663897530944	2.96826716123695	0.00299483903566295	0.0821675162512737	2193.649327794	1955.32346905121	2142.35352376383	3212.94692392192	3063.59864649765	2069.03782841937
FBgn0261802	1197.51076387993	0.292288312546089	0.0984887565692812	2.96773279232621	0.003000050095474	0.0821675162512737	1631.26660039749	1382.16142399567	1741.34888982855	1934.51511023974	1887.3955947173	1998.31334500826
FBgn0264606	536.030515043792	0.779993866258995	0.26310770490166	2.96454209332459	0.0030313376870867	0.0825630136310086	900.050157799488	546.098744445841	922.859979467496	1665.80014303266	1459.99622997154	938.832848418175
FBgn0264493	2544.65114022906	0.669438764241035	0.225900981194498	2.9634168063425	0.0030424429079512	0.0825630136310086	821.578149325556	529.667454789948	756.964911729887	1251.67664378711	1203.55661112408	894.45670196414
FBgn0032706	145.918631920964	-0.503710511999544	0.169978564365831	-2.96337666975143	0.00304283969202069	0.0825630136310086	228.282206469619	289.963935103986	227.419066368776	155.877946345235	185.776257209493	185.825113276271
FBgn0034046	202.215627703684	0.625367042466413	0.211261903691843	2.96015055974599	0.00307488729917075	0.0831742734763309	177.156503979027	115.985574041595	164.79642490491	257.082284644006	245.042302454239	201.079413619845
FBgn0032629	234.586934155309	0.853247900618116	0.288604465972865	2.95646118206064	0.00311191400030179	0.0838773664495005	428.029137130536	182.677279115511	371.341277452397	687.491539477863	613.17562195526	470.109801497432
FBgn0264895	734.361847637097	0.762392939503308	0.257980908630237	2.95523007323012	0.0031243596106619	0.0838773664495005	871.514881990785	535.466733492028	839.363124182342	1502.94258714957	1344.88333440001	959.634167068503
FBgn0267698	682.358366367748	0.368077893640786	0.124573480392847	2.95470506627926	0.00312968083581746	0.0838773664495005	650.366494473342	531.600547690642	648.199271292646	852.675631873559	821.746511951194	682.283251730786
FBgn0036998	108.290908923835	-0.603096870280289	0.20424908857336	-2.95275183107452	0.00314955054374267	0.0839674855631795	67.7712800456682	84.089541180156	70.3131412927616	53.5103397901551	36.4714124583054	58.2436922209207
FBgn0031602	258.114624338219	0.925147880817671	0.313345400576263	2.9524859120838	0.003152264537567	0.0839674855631795	441.107805209524	222.305683579723	364.749420456201	817.777584184327	697.515763265091	434.054182503528
FBgn0035142	1452.7854163283	0.632519726694615	0.214495760190838	2.94886820201881	0.00318939960839096	0.0842109429143962	2425.4984437397	1383.12797044602	2043.47566882088	3575.88661988993	3061.31918321901	2430.9807729351
FBgn0026576	839.65914527045	0.560940502858856	0.190231083313616	2.94873210564693	0.00319080436032985	0.0842109429143962	1073.63975230243	758.738963522098	869.026480665226	1415.6974679265	1510.14442210171	1055.32023286002
FBgn0259984	821.145182825536	0.716245673867192	0.24303541935628	2.94708349821721	0.00320786570812948	0.0842109429143962	952.364830115442	563.49658055208	821.784838859151	1464.55473469142	1317.52977505628	1055.32023286002
FBgn0034145	1005.77225570726	0.609716351727387	0.206929800204704	2.94648886300683	0.00321403992769994	0.0842109429143962	1697.84891061779	1017.77341221499	1535.90268011376	2652.2516243816	2184.86555258036	1646.07768252935
FBgn0004047	264690.476546021	0.497292455561724	0.168780886604708	2.94637897433495	0.00321518210917913	0.0842109429143962	395242.105226337	318056.607683311	357025.961342324	553616.812200689	555579.28356212	401629.086991396
FBgn0030017	57.2189264646241	0.632630422535345	0.214742942922524	2.94598934859334	0.00321923485560356	0.0842109429143962	84.4168576007445	71.52443732565	87.891426615952	137.265654244311	133.348601800679	105.393347828333
FBgn0261258	576.646238803846	0.504043877275302	0.171206169077852	2.94407543834534	0.00323921033712867	0.0844735418429275	663.44516255233	603.124985016292	760.260840227985	1019.02299252556	981.30894145628	872.268628737122
FBgn0041092	1206.49144184102	0.710515216746908	0.241482899859756	2.94230033331365	0.00325783798758738	0.0844735418429275	1888.08408267581	1109.59532499792	1698.50181935327	2894.21142169361	2679.50908404613	2107.86695656665
FBgn0028645	184.431140533001	1.09114256381351	0.370862964392948	2.94217182241305	0.00325919034028413	0.0844735418429275	340.045370053703	134.34995659818	229.616352034175	606.062761536322	573.285014578988	317.566798061687
FBgn0015609	1166.97446609805	0.933161357983127	0.317333180231811	2.94063595020683	0.00327539234041376	0.0844735418429275	1948.7215437693	888.256187868545	1736.95431849775	3645.6827152684	3104.62898551325	1980.2855355113
FBgn0069969	563.156031539283	0.810230540288122	0.275548720664046	2.94042570161656	0.00327761596483375	0.0844735418429275	1172.32424780752	521.935083187175	952.52333595038	1653.00419221327	1609.30107472273	1375.66054007508
FBgn0261611	107.126822765791	0.658955388959221	0.224180825319649	2.9393922875413	0.00328856553033633	0.0845064618780837	184.290322931203	116.952120491941	162.599139239511	286.163991051699	232.505254421697	210.786695656665
FBgn0029888	570.6123994293	-0.440686321471097	0.150050130059806	-2.93692728753685	0.00331481816099325	0.084931279391783	754.995839105251	816.731750542895	617.437271977063	525.79725185109	555.049308349835	532.513757448418
FBgn0011837	1046.43993103732	0.717424077763111	0.244379498819342	2.935696657163	0.00332799587335349	0.0850195904838874	1341.15796300901	734.575302263432	1187.63290214805	2175.31163929544	1842.94606078374	1343.76518481124
FBgn0051721	232.754627359467	0.779965587452319	0.265988404749459	2.93232928024434	0.00336429833488219	0.0856964272649146	311.510094245001	163.346350108579	282.351208003746	554.878958258783	469.569435400682	271.803897030963
FBgn0004370	728.344861991027	0.645314329407829	0.220344122036662	2.92866595869736	0.00340420048789477	0.086046129040474	800.176692469029	546.098744445841	700.934127262217	1166.75806107664	1115.79727489628	916.644775191157
FBgn0002526	1109.10543569084	0.41532223881754	0.141837688195763	2.92815149556243	0.00340983856909457	0.086046129040474	1336.40208370756	1246.84492094714	1248.05825794652	1651.84092395696	1667.42738832815	1790.30015850497
FBgn0032513	427.537179651792	-0.301576760347359	0.103020640182095	-2.92734310148242	0.00341871506073972	0.086046129040474	418.517378527635	410.782241397314	388.919562775588	348.980476892316	314.565932452884	324.50057094513
FBgn0263929	1242.98542362154	0.61920754274553	0.211537412108212	2.92717745090298	0.00342053656544461	0.086046129040474	1569.44016947863	1055.46872377851	1490.85832397309	2330.02631738436	2159.79145651527	1829.12928665225
FBgn0030963	163.531038422071	-0.697892471443321	0.238529183117143	-2.92581587847295	0.00343554201407008	0.086046129040474	43.9918835384162	64.7586121732236	59.3267129657676	25.5919016387698	31.9124859010172	48.5364101841006
FBgn0085385	165.237354260532	1.07421059535729	0.367166980729873	2.92567319975756	0.00343711789345604	0.086046129040474	317.454943371814	133.383410147834	226.320423536076	630.491394918784	476.407825236614	316.180043484998
FBgn0262473	2273.49322685097	0.649512994258884	0.222258679554849	2.92232904271617	0.00347424290180818	0.0867270292374231	1482.64537222716	957.847532293502	1443.61668216701	2325.37324435913	2102.80487454917	1661.33198287293
FBgn0028622	206.86119405367	0.327742955498122	0.112245705716698	2.9198707728323	0.00350176560654275	0.0870522896075232	303.187305467463	311.227957011612	288.943064999942	383.878524581548	408.023926877292	339.754871288704
FBgn0032940	1447.94946033607	0.45706883724518	0.156584737674006	2.91898715056606	0.00351170698641907	0.0870522896075232	1557.55047122501	1246.84492094714	1769.91360347873	2360.27129204836	2089.12809487731	1826.35577749887
FBgn0052085	206.494841557718	0.785104865093212	0.26900943171527	2.91850311748251	0.00351716358377655	0.0870522896075232	392.360042369658	219.406044228683	299.929493326936	617.695444099399	568.7260880217	381.357508589362
FBgn0004102	163.624683277352	0.480893639870752	0.165022515639768	2.91410925355488	0.00356705046591617	0.0878761057985743	316.265973546451	242.603159037002	250.490565855463	418.776572270779	392.067683926783	314.79328890831
FBgn0263397	589.584324029398	0.586762486789786	0.201392318060477	2.91352963430107	0.00357367916325659	0.0878761057985743	1064.12799369953	731.675662912392	854.744123840134	1649.51438744435	1375.65608866171	951.313639608372
FBgn0259176	2814.06365138187	0.687804186694433	0.236155673380867	2.91250333666622	0.00358544369863607	0.0878761057985743	3969.97024688572	2314.87874858016	3399.20092437194	5957.09674055183	5582.40556939937	4056.25713681412
FBgn0086758	359.591412552777	1.08716110111825	0.373332195577404	2.91204753835072	0.00359067984091691	0.0878761057985743	727.649533121911	259.034448692895	441.654418745159	1316.81966614034	1123.77539637154	590.757449669339
FBgn0275436	265.416658999425	-0.35215020068395	0.121026846583623	-2.90968665733708	0.0036179127706086	0.0879704095517862	277.029969309486	330.558886018544	288.943064999942	224.51077346739	233.644986061019	246.842314650569
FBgn0039584	159.860320209628	1.02206102078972	0.351315689563359	2.9092381899027	0.00362310705560195	0.0879704095517862	287.730697737749	146.915060452686	221.925852205279	509.511496262781	483.246215072547	338.368116712016
FBgn0259221	1135.33661244806	0.373350725466212	0.128339026264603	2.90909738317989	0.00362473931997746	0.0879704095517862	1684.7702425388	1334.80064792868	1671.03574853579	2270.69963631267	2086.84863159866	1712.64190221041
FBgn0014023	272.372818092433	-0.423783063312355	0.145725950457376	-2.90808234211043	0.00363652571410586	0.0880119810641079	243.738814199333	271.599552547401	193.361138555094	161.694287626773	182.357062291527	185.825113276271
FBgn0027589	167.245308664757	0.667093459098337	0.22946384810793	2.90718326481025	0.00364699466327485	0.0880215258923546	288.919667563112	210.707126175563	302.126778992335	480.429789855088	463.870777204072	325.887325521818
FBgn0259171	871.731573221199	0.768542771692119	0.264539456217517	2.90521037081208	0.00367006336191411	0.0883342798706435	1513.55858768659	822.531029244975	1404.06554018983	2447.51641127144	2269.20569389019	1651.62470083611
FBgn0000594	14.9976007508352	1.00097176248341	0.344889841090104	2.90229413345318	0.00370440546850009	NA	22.5904266818894	14.4981967551993	18.6769281558898	39.5511207144625	38.7508757369495	31.8953552638375
FBgn0262733	811.246217855694	0.627643278063201	0.216365096595047	2.90085271580522	0.00372148750657403	0.0891327189547345	436.351925908074	271.599552547401	419.681562091171	700.287490297248	571.005551300344	467.336292344054
FBgn0033972	248.405028473057	-0.406860264126893	0.140264163746141	-2.9006715133828	0.00372363997006731	0.0891327189547345	254.439542627596	274.49919189844	213.136709543684	165.184092395696	192.614647045425	203.852922773223
FBgn0000547	919.198202390261	0.702126317834581	0.242174933512914	2.89925265034558	0.00374053349456435	0.0891939690830456	939.286162036453	670.783236540555	896.492551482711	1594.84077939788	1448.59891357832	1031.74540505631
FBgn0262116	1193.64482809894	-0.544355297505855	0.18783250533324	-2.89808889329403	0.00375444160050386	0.0891939690830456	967.821437845156	1566.77179601187	1005.25819191995	708.430368091402	762.480466706447	959.634167068503
FBgn0010215	1620.15233169266	0.384603549876864	0.132718484724267	2.89788985065576	0.00375682506839428	0.0891939690830456	1388.71675602352	1069.96692053371	1298.59582825069	1782.12696866343	1646.91221882035	1471.34660586659
FBgn0086913	84.0774539040598	0.949784112664203	0.32839995066723	2.89215668496439	0.00382607083626565	0.090591818147569	124.841831663073	80.2233553787696	142.823568250922	275.69457674493	234.784717700341	159.476776319188
FBgn0003863	3578.57408548383	-2.50715369958953	0.867823938139522	-2.88901191751459	0.00386454427501433	0.0912554684616221	49.9367326652292	14.4981967551993	68.1158556273628	3.48980476892316	19.3754378684747	0
FBgn0039620	1104.71184780815	0.443588967794425	0.153652249848445	2.88696695448299	0.00388975081353665	0.0915342105059305	1865.49365599392	1429.52220006265	1638.07646355481	2661.55777043206	2285.1619368407	1757.01804866444
FBgn0264495	771.625160793226	0.690321025826788	0.239203294034689	2.88591772371946	0.00390274168432442	0.0915342105059305	842.979606182083	692.047258448181	880.01290899222	1576.22848729696	1331.20655472815	987.369258602275
FBgn0052521	1806.04339555293	0.419743946828263	0.145466031688313	2.88551177176291	0.00390777847301271	0.0915342105059305	2684.69386566875	2502.3887599474	3106.9619308739	4119.13289558564	3754.27601992681	3218.65737249421
FBgn0287182	5712.71703837954	0.661149965322111	0.229226821612233	2.8842609284202	0.00392333527197286	0.0916528884257403	5067.3893956954	3328.78597499376	4586.83382652	7221.56933515833	6848.64742068616	6458.11606363876
FBgn0003731	1834.3677218833	0.530807130107301	0.184225918832014	2.88128366232395	0.00396059019265384	0.0919302306346518	2728.68574920717	2083.87414694732	2979.51936228077	4576.29732031457	3852.29294090851	2824.81907271465
FBgn0015872	455.851957113016	0.433031357196494	0.150371446299505	2.87974457819602	0.00397997464589468	0.0919302306346518	625.398128140727	548.031837346534	604.25355798467	951.553433659715	816.047853754583	628.199823239931
FBgn0033184	267.554082521902	-0.41820611476906	0.145224486773065	-2.87972176085271	0.00398026267262263	0.0919302306346518	284.163788261661	300.595946057799	244.997351691966	186.122921009235	204.011963438646	232.974768883683
FBgn0263220	587.375658740931	0.756552352547192	0.262755077800088	2.87930630639534	0.00398551032685532	0.0919302306346518	1084.34048073069	636.954110778423	1012.94869174885	1856.57613706712	1644.63275554171	1114.95067965763
FBgn0052113	661.391644887553	0.577699160429375	0.20065193261316	2.87911087077905	0.00398798106909507	0.0919302306346518	667.012072028418	491.97214322643	665.777556615837	1034.14547985756	994.985721128144	690.603779190917
FBgn0086778	405.748513514324	0.947850137112322	0.329309843608515	2.87829275531505	0.00399833897689913	0.0919302306346518	808.499481246567	363.42146533033	596.563058155774	1326.1258121908	1224.07178063188	858.401082970236
FBgn0029922	134.312956403805	0.970811851666265	0.337513979311329	2.87636042112131	0.00402290070860838	0.0922521876407125	222.337357342806	111.152841789861	179.078781730002	424.592913552318	336.220833600003	241.295296343814
FBgn0259145	348.960137732496	1.02218393766316	0.355747596981403	2.87334038609569	0.00406156253421508	0.0928949525168511	646.799584997254	270.633006097054	508.671631539822	1149.30903723203	1075.90666752001	668.4157059639
FBgn0266411	2456.91619733536	0.601942596165175	0.209607059205526	2.87176681189422	0.00408184044547449	0.0931149868723515	3409.96545913993	2302.31364472565	3309.11221209059	5455.72812208321	4974.92860564072	3257.48650064149
FBgn0260753	310.171372446576	0.50501799781284	0.176066193370028	2.86834166256706	0.00412629675380673	0.0937565786341497	520.768783508819	416.581520099394	524.052631197614	758.450903112634	699.795226543735	612.945522896356
FBgn0010385	393.94258116017	-2.72399110697964	0.949804744822512	-2.86794851450091	0.00413142758087989	0.0937565786341497	133.164620440611	815.765204092548	58.2280701330682	10.4694143067695	60.4057768840683	81.8185200246267
FBgn0035164	82.7933817366111	-0.674045996017824	0.235171392324219	-2.86619043819986	0.00415444247013906	0.0937868899790236	55.8815817920422	71.52443732565	45.0443561406754	41.8776572270779	28.4932909830511	38.8291281472805
FBgn0263346	1597.01124061039	0.458151796571494	0.159868330702205	2.86580709612161	0.00415947620371356	0.0937868899790236	2267.36545696648	1617.99875788024	2265.40152102616	3014.0280520933	2794.62197961765	2637.6072048617
FBgn0011205	1067.86669926543	0.285001809875906	0.0994788981021087	2.8649473940028	0.00417078523286842	0.0937868899790236	1257.93007523363	1085.43166373926	1123.91161785149	1470.37107597296	1479.37166784001	1268.88043767006
FBgn0037705	423.856076388301	0.567528956545055	0.19811982024956	2.86457435621621	0.00417570106464921	0.0937868899790236	757.373778755976	489.07250387539	524.052631197614	985.288213092639	936.85940752272	697.53755207436
FBgn0023213	4384.83641647745	0.622429664201155	0.217809548907241	2.8576784963006	0.00426752538317671	0.0946860174960375	3389.75297210877	2411.53339361482	3616.73220524643	5663.95313996229	5012.53974973835	3819.12210420037
FBgn0037899	1598.31087638765	-0.500222015565232	0.175090027926032	-2.85694177726989	0.00427744292198198	0.0946860174960375	1357.80354056409	1848.03681306274	1373.30354087425	1035.30874811387	1073.62720424137	1130.2049800012
FBgn0038197	1263.63856381592	0.459598204527675	0.160877501870298	2.85682086795586	0.00427907256991539	0.0946860174960375	1645.53423830184	1305.80425441829	1784.19596030383	2459.14909383452	2280.60301028341	1768.11208527795
FBgn0052205	48.8134822243416	-1.54224210875616	0.53987595796152	-2.85666010129328	0.00428124029781863	0.0946860174960375	11.889698253626	8.69891805311959	15.3809996577916	1.16326825630772	4.55892655728818	6.93377288344294
FBgn0000024	840.90431262064	0.724670133288934	0.253681858324398	2.85660999992461	0.00428191605265851	0.0946860174960375	1527.82622559094	900.821291723051	1388.68454053204	2471.94504465391	2290.86059503731	1542.07108927771
FBgn0259994	538.796227861272	0.704368612766488	0.246578634884368	2.85656789809384	0.00428248398650308	0.0946860174960375	1085.52945055605	588.626788261092	848.152266843937	1605.31019370465	1514.703348659	985.982504025587
FBgn0003716	803.284325218173	0.637979678385684	0.223390594215003	2.85589319741752	0.00429159470395226	0.0946860174960375	1104.55296776185	635.987564328077	934.94505062719	1527.37122053204	1509.00469046239	1123.27120711776
FBgn0261988	910.547459703276	0.606641441436216	0.212487023357839	2.85495759623213	0.00430425753624547	0.0947261916729892	1180.64703658506	836.062679549827	1189.83018781345	1995.00505956774	1540.9171763634	1343.76518481124
FBgn0036121	42.6356181541252	-0.681957227713163	0.238973651653464	-2.85369212461159	0.00432143887904434	0.094865355492991	63.0154007442178	56.059694120104	48.3402846387736	26.7551698950776	34.1919491796613	44.3761464540348
FBgn0053182	155.690051594356	0.560257243884624	0.196423973044155	2.85228546802014	0.00434061005034463	0.0950473935084237	174.778564328302	150.781246254073	184.571995893499	294.306868845853	230.225791143053	226.04099600024
FBgn0004839	37.4827700074808	0.691999247006471	0.242679910229868	2.85148962825561	0.00435149058527626	0.0950474331088967	54.6926119666796	33.8291257621317	42.8470704752766	69.7960953784632	77.501751473899	62.4039559509865
FBgn0267336	208.954258331852	0.908512210940933	0.318807184584806	2.84972313947103	0.00437573000722311	0.0953385363419159	304.376275292825	196.208929420364	280.153922338347	621.185248868323	529.97521228475	312.019779754932
FBgn0050423	429.10101041756	-0.449217832016661	0.158220039628255	-2.83919681142869	0.00452272520807605	0.0982961446342299	470.832050843589	588.626788261092	502.079774543626	329.204916535085	404.604731959326	411.866109276511
FBgn0263131	239.64642998508	0.775353025648509	0.27320230134062	2.83801791509005	0.0045394634685986	0.0984151174321239	435.162956082711	250.335530639775	411.991062262275	693.307880759401	713.4720062156	468.723046920743
FBgn0052677	304.231031678917	0.854749306791962	0.301329575434149	2.83659280892179	0.00455977238414892	0.098610721089874	517.201874032731	296.729760256413	492.191989049331	967.839189248023	881.01255719594	510.325684221401
FBgn0261793	1286.21806823757	0.715317492994986	0.252439270583889	2.83362208795987	0.00460237237607019	0.0990385558857655	1117.63163584084	722.976744859273	945.931478954184	1792.5963829702	1642.35329226307	1137.13875288464
FBgn0033652	308.703765680833	0.934338350783825	0.329739720018921	2.83356324415575	0.00460321982177687	0.0990385558857655	558.815817920422	258.067902242548	435.062561748963	1029.49240683233	839.982218180346	520.032966258221
FBgn0265379	65.372482512289	0.976543820258834	0.344721829266716	2.83284589878197	0.00461356212035099	0.0990385558857655	108.196254107997	56.059694120104	106.568354771842	237.306724286775	183.496793930849	109.553611558399
FBgn0267665	17.1407060802432	1.05560717990486	0.372661002214436	2.83262046104155	0.00461681670301314	NA	27.3463059833398	12.5651038545061	25.2687851520862	52.3470715338474	49.0084604908479	31.8953552638375
FBgn0040022	742.005801156985	0.518925343529718	0.18324472177487	2.83187061817397	0.00462765694249552	0.0990976438886847	720.515714169735	556.730755399654	693.243627433322	1032.98221160126	992.7062578495	794.610372442561
FBgn0000633	320.55269362615	0.888667446206907	0.313926702051654	2.83081190736264	0.00464300163322059	0.0991831424680888	574.272425650135	264.833727394974	508.671631539822	1085.3292831351	860.497387688143	546.381303215304
FBgn0250862	12.2318172238453	1.51708033600964	0.536019335244931	2.83027166420484	0.00465084952288063	NA	4.7558793014504	7.73237160277297	3.2959284980982	18.6122921009235	17.0959745898307	9.70728203682012
FBgn0031910	259.542916712727	-3.06443476280051	1.08297979959083	-2.82963243077879	0.00466015091573088	0.0993066793920504	46.3698231891414	56.059694120104	130.738497091229	1.16326825630772	10.2575847538984	16.6410549202631
FBgn0038020	293.753260283054	-0.698258215203237	0.246842262973768	-2.82876281715762	0.00467283157917494	0.0993346216721448	342.423309704429	627.288646274957	475.71234655884	218.694432185851	291.771299666443	382.74426316605
FBgn0000179	166.493899042459	0.926331887285575	0.327659083834321	2.82712103215783	0.00469685720520674	0.0994825345994649	293.675546864562	167.212535909965	206.544852547487	511.838032775397	468.42970376136	285.671442797849
FBgn0263974	269.699992009608	0.853495716772431	0.301937229347362	2.82673229338847	0.00470256229707897	0.0994825345994649	73.7161291724812	28.029847060052	69.2144984600622	104.694143067695	107.134774096272	94.299311214824
FBgn0039936	2757.58940316232	0.524300567683702	0.185576243392016	2.82525692998407	0.00472427171392894	0.0996767731331622	1820.31280263014	1386.02760979705	1889.66567224297	2717.39464673483	2531.34397093426	2077.35835587951
FBgn0262738	2551.79764739735	0.745527994309763	0.264113626897846	2.82275474789538	0.00476129786480343	0.0996767731331622	4217.27597056114	2608.70886948553	4108.92419429576	7613.59073753403	6232.05260381294	4484.7643010109
FBgn0036934	211.744956847628	0.599077708649744	0.212252787130718	2.82247275405998	0.00476548710628646	0.0996767731331622	410.194589750097	257.101355792201	375.735848783195	565.348372565552	541.372528677971	470.109801497432
FBgn0262483	393.16760256051	0.873759242129334	0.309610326126385	2.82212564762023	0.00477064822710346	0.0996767731331622	801.365662294392	371.153836933103	596.563058155774	1238.88069296772	1202.41687948476	797.383881595938
FBgn0015774	353.353039978374	1.10464171446269	0.391488538384916	2.8216450959711	0.00477780189273878	0.0996767731331622	614.697399712464	233.904240983882	469.120489562644	1241.20722948034	1021.19954883255	568.569376442321
FBgn0001247	762.22390473613	0.206282174639793	0.0731283748694384	2.82082262880973	0.00479006796559417	0.0996767731331622	837.03475705527	836.062679549827	927.254550798294	1000.41070042464	1029.17767030781	967.954694528635
FBgn0000028	39.785542961403	1.00484364180111	0.356349384794535	2.81982707050408	0.00480495359825417	0.0996767731331622	73.7161291724812	30.9294864110919	71.411784125461	134.939117731696	123.091017046781	92.9125566381354
FBgn0004168	250.49298846634	0.697928813683416	0.247584184857573	2.81895555681358	0.00481801885762953	0.0996767731331622	458.942352589963	307.361771210226	401.004633935281	753.797830087403	666.743009003396	470.109801497432
FBgn0083949	553.405545449072	0.785786010754033	0.278781776771954	2.8186419494586	0.00482272814790497	0.0996767731331622	985.655985225595	601.191892115598	887.703408821116	1860.06594183604	1446.31945029967	956.860657915126
FBgn0034392	234.703324059835	-0.380890732926215	0.13514260874645	-2.81843555085449	0.0048258298083241	0.0996767731331622	256.817482278321	267.733366746014	243.898708859267	179.143311471389	202.872231799324	209.399941079977
FBgn0036853	201.982945756157	-0.481429020674549	0.170909657093668	-2.81686259782674	0.00484952675602108	0.099705492369592	104.629344631909	134.34995659818	104.371069106443	84.9185827104636	71.8030932772888	91.5258020614469
FBgn0016697	1210.17986814101	-0.43200847501217	0.15336698668828	-2.81682834318335	0.00485004398043683	0.099705492369592	653.93340394943	758.738963522098	622.93048614056	482.756326367704	469.569435400682	558.862094405501
FBgn0036848	267.983382323819	-0.346575105008018	0.123183644876192	-2.81348311584992	0.00490079597495684	0.0998796411509284	258.006452103684	318.960328614385	257.08242285166	217.531163929544	207.431158356612	234.361523460371
FBgn0028369	235.705053841674	0.766963648700243	0.272605418135687	2.81345709834165	0.00490119257432034	0.0998796411509284	417.328408702272	216.506404877643	335.086063973317	642.124077481862	591.520720808141	411.866109276511
FBgn0014073	175.506248192116	0.412980759289226	0.146812919542177	2.81297286762684	0.00490857927310495	0.0998796411509284	286.541727912386	236.803880334922	221.925852205279	376.898915043701	324.823517206783	287.058197374538
FBgn0036663	6125.29043004459	0.336089458565743	0.119483824013644	2.81284484607192	0.00491053386061952	0.0998796411509284	9809.00105924144	8038.76682753285	10116.3032034961	12923.9103275788	12083.4348400923	10286.9454498759
FBgn0259677	247.912740467659	0.969326666493457	0.34469334329977	2.81214211221498	0.00492127549487349	0.0998796411509284	472.021020668952	185.576918466551	355.960277794606	801.491828596019	723.729590969498	456.242255730546
FBgn0000157	129.223931682487	0.417078545310371	0.148333556120916	2.8117612509093	0.00492710602449927	0.0998796411509284	253.250572802234	220.37259067903	213.136709543684	326.878380022469	316.845395731528	270.417142454275
FBgn0001168	324.375569980556	0.419336757347292	0.149246965514817	2.80968364013848	0.00495902189519613	0.100248285111479	347.179189005879	333.458525369584	379.031777281293	474.61344857355	494.643531465767	446.534973693726
FBgn0260429	297.561844993112	0.886473465344979	0.315622109244527	2.80865452508014	0.00497490010996467	0.100248285111479	443.48574486025	234.870787434229	458.13406123565	892.226752588021	698.655494904413	507.552175068023
FBgn0031990	1326.12966991779	0.618308064179646	0.220168274044069	2.80834314963964	0.00497971337282612	0.100248285111479	1766.80916048882	1192.71831972773	1707.29096201487	3026.82400291269	2362.6636883146	1770.88559443133
FBgn0086372	1096.97398001751	0.496715586445646	0.176939857526291	2.80725662035667	0.00499654202028113	0.100355833634934	1309.05577772422	921.11876718033	1142.58854600738	1853.0863322982	1629.81624423052	1271.65394682344
FBgn0053978	594.832252631019	0.611322098059483	0.217917130398489	2.80529620109077	0.00502703601415787	0.100736728568113	1046.29344631909	850.560876305027	811.897053364857	1462.2281981788	1522.68147013425	1151.00629865153
FBgn0038286	923.449487452232	0.41866324088418	0.14934058490844	2.80341235532766	0.00505649735101145	0.101095234223769	914.317795703839	722.976744859273	951.424693117681	1210.96225481634	1152.26868735459	1094.1493610073
FBgn0030984	29.845797015175	-1.64383948993079	0.586974755352935	-2.80052842978296	0.0051019013262959	NA	9.51175860290079	11.5985574041595	13.1837139923928	3.48980476892316	2.27946327864409	5.54701830675435
FBgn0038013	159.700013825394	-0.465683921434243	0.166293255616099	-2.80037768043529	0.00510428479890877	0.101817662758141	128.408741139161	147.881606903033	127.44256859313	80.2655096852327	96.8771893423737	117.87413901853
FBgn0003984	78.8799035349317	0.557259046067886	0.199058603662517	2.79947229516721	0.00511862087947399	0.101871049257322	134.353590265974	89.8888198822358	91.1873551140502	189.612725778158	135.628065079323	135.901948515482
FBgn0030048	161.38993104874	-0.667476757870525	0.238700460845305	-2.79629438295512	0.00516922918249713	0.102644444016994	41.613943887691	64.7586121732236	47.2416418060742	32.5715111766162	30.7727542616952	34.6688644172147
FBgn0035688	825.495795069786	0.496548001352753	0.177736686356532	2.79372824784581	0.00521042441720705	0.103227841571741	812.066390722655	546.098744445841	722.906983916205	1135.34981815634	1023.4790121112	772.422299215544
FBgn0264794	135.938075496939	0.886954269538033	0.317752995680719	2.79133251800796	0.00524915155157216	0.103759812457208	274.65202965876	130.483770796794	218.629923707181	414.123499245548	400.045805402037	336.981362135327
FBgn0003165	2247.33777424482	0.911388399797858	0.3269516991989	2.78753223191973	0.00531111705722812	0.104624377923682	3172.17149406742	1519.41101994489	2432.39523159647	5489.46290151613	4729.88630318648	3177.05473519356
FBgn0260657	1059.35606945209	0.778971964950115	0.279483577015709	2.7871833231415	0.00531683916654629	0.104624377923682	2143.71259512877	1101.86295339515	1720.47467600726	3336.25335909054	3067.01784141562	2114.8007294501
FBgn0026401	3334.28056435965	0.641509392051206	0.230340090949957	2.7850531334147	0.00535189523947912	0.105037837453085	2907.03122301156	2025.88135992652	2536.76630070292	4080.74504312748	4034.65000320004	3534.83741597921
FBgn0022987	336.627609641616	0.497746979845016	0.17875967272604	2.78444781339382	0.00536189487284833	0.105037837453085	366.202706211681	302.529038958492	374.637205950496	571.164713847091	511.739506055598	386.904526896116
FBgn0003321	697.546863921101	0.262838061939836	0.0944643489759315	2.78240484150062	0.00539576859641227	0.105395718363572	720.515714169735	591.526427612132	724.005626748905	845.696022335713	847.960339655601	741.913698528395
FBgn0039098	175.803055139309	-0.657733743416258	0.236433898832617	-2.7818927263129	0.0054042900110885	0.105395718363572	74.9050989978438	106.320109538128	70.3131412927616	38.3878524581548	50.1481921301699	73.4979925644952
FBgn0085391	239.928129850964	1.14525526891751	0.412346849454044	2.77740758886325	0.00547944189665705	0.106623349334282	410.194589750097	156.580524956153	317.507778650127	800.328560339712	764.759929985092	388.291281472805
FBgn0004191	2787.10983500199	-0.846085474869396	0.304991735585496	-2.77412590621565	0.00553502519184173	0.107448428936687	2940.32237812171	4805.6689511234	1876.48195825058	1499.45278238065	1781.40055226035	2073.19809214944
FBgn0052580	25.0812134207382	1.3564950468423	0.489131128001137	2.77327483201835	0.00554952305534073	NA	8.32278877753819	4.83273225173311	5.493214163497	18.6122921009235	20.5151695077968	6.93377288344294
FBgn0260400	73.833473468282	0.971933440172096	0.350517381630503	2.77285376163359	0.0055567085610712	0.107448428936687	166.455775550764	42.5280438152513	108.765640437241	241.959797312006	221.107938028477	156.703267165811
FBgn0263864	373.74839040325	0.33432012239397	0.120574136408734	2.77273495254952	0.00555873753913041	0.107448428936687	404.249740623284	357.62218662825	420.78020492387	557.205494771398	498.062726383733	431.280673350151
FBgn0036733	268.820364173821	-0.351792264844531	0.1269453507161	-2.77121031105171	0.00558483420957441	0.107491104030791	225.904266818894	218.439497778336	203.248924049389	186.122921009235	173.239209176951	145.609230552302
FBgn0085395	163.19336676071	0.718769194171723	0.259374047959068	2.7711685106027	0.0055855512452763	0.107491104030791	329.34464162544	147.881606903033	248.293280190064	432.735791346472	439.936412778309	317.566798061687
FBgn0266227	77.0683298319902	1.01116396126678	0.365061503949268	2.76984549268524	0.00560828896752236	0.107522451164329	177.156503979027	58.9593334711439	114.258854600738	248.939406849852	243.902570814917	210.786695656665
FBgn0267668	406.163554884931	0.738658224133312	0.26671515195588	2.76946479686877	0.00561484715687442	0.107522451164329	674.145890980594	448.477552960832	665.777556615837	1199.32957225326	989.287062931534	793.223617865873
FBgn0052432	714.369549374856	0.679570517829524	0.245427265265164	2.76892837108096	0.0056240998262674	0.107522451164329	1360.18148021481	818.664843443588	1223.88811562713	2211.37295524098	1932.98486029019	1302.16254751058
FBgn0261631	10.0566319105429	-3.68533660132052	1.33208771656516	-2.76658703138806	0.00566464624199269	NA	4.7558793014504	0.966546450346621	3.2959284980982	0	0	0
FBgn0264975	838.228146913162	0.48330041658961	0.174796370593687	2.76493393397188	0.00569343255149876	0.108541614661172	1224.63892012348	891.155827219585	1103.0374040302	1666.96341128896	1561.4323458712	1267.49368309337
FBgn0005564	279.243792163615	0.613682216910157	0.222027783371031	2.76398839637394	0.00570995697965484	0.108541614661172	574.272425650135	338.291257621317	462.528632566448	813.124511159096	768.179124903058	518.646211681532
FBgn0086904	4496.00095840093	-0.308245297198928	0.111532804278962	-2.76371870313558	0.0057146781211101	0.108541614661172	3263.72217062033	3929.01132065902	3268.46242728072	2687.14967207083	2815.13714912545	2949.62698461663
FBgn0261555	362.305461601995	0.458275929904957	0.165938147920104	2.76172740053485	0.0057496461676834	0.108968890600976	568.327576523322	382.752394337262	489.994703383933	746.818220549556	673.581398839328	554.701830675435
FBgn0032986	622.117011317509	0.412969039960168	0.149605881912104	2.76037970353862	0.00577342161150798	0.109028575879333	727.649533121911	606.991170817678	682.257199106328	1022.51279729449	934.579944244076	723.885889031443
FBgn0033179	837.226220973805	-0.282881673006435	0.102492421880342	-2.76002525666429	0.00577968930416936	0.109028575879333	733.594382248724	722.010198408926	633.916914467554	570.001445590783	572.145282939666	575.503149325764
FBgn0266129	48.6471294251319	0.76281583334662	0.276498415346477	2.75884341829137	0.00580063213845841	0.109028575879333	64.2043705695804	30.9294864110919	61.5239986311664	90.7349239920022	102.575847538984	69.3377288344294
FBgn0260658	389.326263559554	1.070136972798	0.387909801537522	2.75872630327049	0.00580271120337529	0.109028575879333	731.216442597999	271.599552547401	573.491558669087	1364.51366464896	1178.48251505899	764.101771755412
FBgn0002031	1139.63402086571	-0.31617041084616	0.114649699756082	-2.75770814506112	0.00582081421661795	0.10913402105277	816.822270024106	698.813083600607	730.597483745101	622.34851712463	557.328771628479	624.039559509865
FBgn0033802	37.5726931804541	0.942063378209352	0.341981332081649	2.75472164657348	0.0058742087157803	0.109899275267179	23.779396507252	20.297475457279	39.5511419771784	55.8368763027706	58.1263136054242	45.7629010307234
FBgn0010395	147.878709961039	-0.549006210307615	0.199676059561478	-2.74948439744517	0.00596891044904287	0.111192125860567	70.1492196963934	82.1564482794628	83.4968552851544	47.6939985086165	51.287923769492	63.7907105276751
FBgn0040297	107.666721267195	0.869852000861585	0.316446445840315	2.74881267366336	0.00598115580981052	0.111192125860567	160.510926423951	105.353563087782	138.428996920124	264.061894181852	274.675325076613	198.305904466468
FBgn0037603	133.922585292328	-0.45284639009348	0.164743648556456	-2.74879422703992	0.00598149240637137	0.111192125860567	142.676379043512	148.84815335338	139.527639752824	108.183947836618	99.1566526210178	108.16685698171
FBgn0025936	1598.47824776255	0.555182651178103	0.202049431983434	2.7477565550574	0.00600045437142442	0.111307791599013	1719.25036747432	1229.4470848409	1565.56603659665	2419.59797312006	2360.38422503595	1849.93060530258
FBgn0039689	188.348407885046	-0.365297991044074	0.133017751636855	-2.74623489383097	0.00602835849434961	0.111588491875281	178.34547380439	221.339137129376	172.486924733806	160.531019370465	145.885649833222	138.675457668859
FBgn0262601	447.952980869365	-0.466393790438173	0.170119847412679	-2.74156012676633	0.00611481681309508	0.112949586672329	193.802081534104	217.47295132799	164.79642490491	112.837020861849	150.44457639051	155.316512589122
FBgn0029665	185.425638805411	-0.492783192929905	0.179796812831406	-2.74077824389459	0.006129386010175	0.11297984297658	127.219771313798	168.179082360312	132.935782756627	109.347216092926	91.1785311457635	105.393347828333
FBgn0053120	388.442440844474	0.476750120084641	0.174012015530281	2.7397540257884	0.00614851805108697	0.113079926415909	560.004787745784	480.373585822271	647.100628459947	838.716412797866	854.798729491533	651.774651043637
FBgn0026411	92.045879519257	0.786695527494744	0.287209147390414	2.7391033142317	0.00616070103856847	0.113079926415909	162.888866074676	113.085934690555	134.034425589327	314.082429203084	238.203912618307	152.543003435745
FBgn0037121	162.64887245225	-0.458295288684604	0.167372103820019	-2.73818204004547	0.00617798682754644	0.113159477803508	104.629344631909	129.517224346447	101.075140608345	74.4491684036941	72.9428249166108	99.8463295215784
FBgn0035266	1177.54827235172	0.412097860900551	0.150547593779202	2.73732612096708	0.00619408548660206	0.113216997691302	1366.12632934163	1056.43527022886	1186.53425931535	1743.73911620527	1719.85504373696	1334.05790277442
FBgn0013272	4785.48014076556	0.309487755328506	0.113121213240694	2.73589494368306	0.00622108835935035	0.113244972713857	5856.86535973616	5420.39249354385	6513.85335507475	7619.40707881557	7508.55203985363	6917.13182852268
FBgn0250823	1598.4837751513	0.583522864321034	0.213321528872378	2.73541478633473	0.00623017148891203	0.113244972713857	1441.03142833947	985.877379353554	1262.34061477161	2147.39320114405	1882.83666816002	1494.9214336703
FBgn0033294	345.279042908959	3.61834708502886	1.32288878128122	2.73518615943246	0.0062345006152415	0.113244972713857	0	0	0	4.65307302523088	0	2.77350915337718
FBgn0278598	56.3629439983486	0.75171096935874	0.275080686090687	2.7326926511697	0.00628189216451454	0.113869070210298	70.1492196963934	41.5614973649047	53.8334988022706	102.367606555079	100.29638426034	73.4979925644952
FBgn0051549	453.496014914125	-0.400018451872513	0.14651122116065	-2.73029225136203	0.0063278201796242	0.114464109543223	354.313007958055	433.979356205633	371.341277452397	279.184381513853	254.160155568816	349.462153325524
FBgn0263256	237.402462085834	0.383809464075897	0.140743970033804	2.72700467369019	0.00639121338193546	0.114643525305368	247.305723675421	229.071508732149	284.548493669145	337.347794329239	378.390904254919	273.190651607652
FBgn0002945	249.240347038953	0.546373798646355	0.20037295919906	2.72678409716732	0.00639548706860312	0.114643525305368	394.737982020383	293.830120905373	439.45713307976	590.940274204322	556.189039989157	497.844893031203
FBgn0043470	178.892571466629	3.61590027815437	1.32613389940142	2.72664794994418	0.00639812621449524	0.114643525305368	0	0	0	6.97960953784632	0	0
FBgn0260960	1536.84290217116	0.381773896778222	0.140032444590704	2.72632458780604	0.00640439835606251	0.114643525305368	1801.28928542434	1531.00957734905	1928.11817138745	2504.51655583052	2383.17885782239	1962.25772601435
FBgn0039777	375.660555948576	3.61565632939127	1.32644491693734	2.72582470875576	0.00641410522128473	0.114643525305368	0	0	0	5.8163412815386	1.13973163932204	0
FBgn0033661	1390.25664547191	0.675196581426793	0.247721797443111	2.72562442383316	0.00641799815257218	0.114643525305368	614.697399712464	495.838329027817	698.736841596819	1297.04410578311	886.71121539255	703.084570381114
FBgn0262127	251.727423882988	0.864151411531974	0.317193035216792	2.7243707004517	0.00644241507219741	0.114643525305368	246.116753850058	170.112175261005	236.208209030371	516.491105800628	393.207415566105	275.964160761029
FBgn0085432	2944.92642687983	0.627774975161152	0.230434016961584	2.72431554784643	0.00644349111463753	0.114643525305368	5948.41603628908	2949.89976645789	5483.32637800271	7847.40765705188	7432.19002001905	6939.3199017497
FBgn0010750	483.921314441011	0.352233171337464	0.129322355288326	2.72368354684042	0.00645583317503047	0.114643525305368	360.257857084868	336.358164720624	341.677920969514	535.103397901551	429.678828024411	356.395926208967
FBgn0038877	951.081836592654	0.390200449574905	0.143298008239295	2.72299981255359	0.00646920945775409	0.114648038605269	1731.14006572794	1366.69668079012	1506.23932363088	2354.45495076683	2043.53882930442	1630.82338218578
FBgn0032435	152.874553020914	-2.47570680362618	0.909676253488514	-2.72152515153837	0.00649814400072356	0.114927700676765	2.3779396507252	9.66546450346621	7.6904998288958	0	1.13973163932204	2.77350915337718
FBgn0033984	427.720649667611	0.489780501796121	0.180167080836004	2.71847942212008	0.00655827350242393	0.115660131339296	282.974818436299	230.038055182496	297.732207661538	399.001011913548	393.207415566105	343.91513501877
FBgn0031413	133.656780713723	0.429837250215154	0.158139549498178	2.71808824281561	0.0065660324074958	0.115660131339296	89.1727369021949	101.487377286395	115.357497433437	147.73506855108	124.230748686103	141.448966822236
FBgn0032715	267.105203749545	-0.467154824471122	0.172550328557954	-2.70735401303059	0.00678218923047121	0.119227338645125	184.290322931203	221.339137129376	248.293280190064	146.571800294773	176.658404094917	149.769494282368
FBgn0038390	226.354547399788	-0.971039741548415	0.358897770413506	-2.70561653372666	0.00681777226056344	0.119612201286231	19.0235172058016	27.0633006097054	17.5782853231904	11.6326825630772	14.8165113111866	5.54701830675435
FBgn0003392	1499.82177246343	0.504716522955317	0.186755313012092	2.70255509637167	0.00688087794636392	0.120097052129347	2102.09865124108	1465.28441872548	1923.72360005665	2920.96659158869	2751.31217732341	2114.8007294501
FBgn0053531	143.411060600708	0.865520235678991	0.320311204515144	2.7021228838658	0.00688982932955366	0.120097052129347	263.951301230497	132.416863697487	225.221780703377	456.001156472626	403.465000320004	270.417142454275
FBgn0022382	990.01728315372	0.710879555667238	0.263094156285553	2.7019967516712	0.00689244357509146	0.120097052129347	1206.80437274304	607.957717268025	1034.92154840284	1839.12711322251	1665.14792504951	1156.55331695828
FBgn0036844	689.958904333241	0.530865247176508	0.196576586722584	2.70055175963394	0.00692245646590171	0.120097052129347	766.885537358876	477.473946471231	716.315126920009	1091.14562441664	1026.89820702916	710.018343264557
FBgn0039938	799.939165391707	0.578747008345394	0.214307489673375	2.7005449470173	0.00692259824348339	0.120097052129347	1329.26826475539	860.226340808493	1304.08904241419	1964.76008490374	1886.25586307798	1363.17974888488
FBgn0052708	104.66542771359	-0.540946988553324	0.200329138536501	-2.70029109347346	0.00692788305747863	0.120097052129347	57.0705516174048	81.1899018291162	74.7077126235592	53.5103397901551	50.1481921301699	42.9893918773463
FBgn0028879	243.894679462182	0.85181212817832	0.315740690778358	2.69782182992774	0.00697947846040082	0.120751887739647	438.729865558799	258.067902242548	395.511419771784	745.654952293249	714.611737854922	508.938929644712
FBgn0040752	1414.6468705033	0.750827276109066	0.278425163916642	2.69669330726822	0.00700317370693991	0.120873612993662	1718.06139764896	1020.67305156603	1719.37603317456	2968.6605900973	2609.98545404748	1920.6550887137
FBgn0021967	837.168704367964	-0.417887131552405	0.155044546680541	-2.69527139457175	0.00703313202359856	0.120873612993662	957.120709416892	1152.12336881317	809.699767699458	664.226174351708	735.126907362718	787.676599559118
FBgn0286198	505.79535649356	0.546734668789965	0.202860984649382	2.69511986119422	0.00703633146051749	0.120873612993662	588.540063554487	627.288646274957	788.825553878169	1044.61489416433	958.514308669839	924.965302651289
FBgn0086129	468.782786958323	0.374556162594089	0.138989176287218	2.69485849617582	0.00704185292592123	0.120873612993662	279.407908960211	260.000995143241	342.776563802213	378.062183300009	405.744463598648	357.782680785656
FBgn0053516	128.043880847841	0.710920074449109	0.264031557810542	2.69255720923798	0.00709063694657403	0.12108529329722	184.290322931203	128.550677896101	202.15028121669	368.756037249547	274.675325076613	196.91914988978
FBgn0029502	363.861879562231	-0.365834323244822	0.135894351363109	-2.69204951916886	0.00710144002543531	0.12108529329722	319.832883022539	436.878995556673	346.072492300311	282.674186282776	288.352104748477	287.058197374538
FBgn0283468	1312.86592010825	0.292445557813499	0.108638818748958	2.69190664240636	0.00710448294706699	0.12108529329722	902.428097450213	750.040045468978	900.887122813508	1065.55372277787	1116.9370065356	938.832848418175
FBgn0003159	423.709285386071	0.478424708126726	0.177800509948449	2.69079491541075	0.00712820000180225	0.12108529329722	393.54901219502	280.29847060052	343.875206634912	575.817786872322	437.656949499665	400.772072663002
FBgn0033778	98.6254300949176	-0.706917628594348	0.262726705250932	-2.69069574757985	0.00713031905017442	0.12108529329722	179.534443629753	285.131202852253	184.571995893499	102.367606555079	117.392358850171	180.278094969517
FBgn0039510	46.7848791014303	0.821551212827666	0.305392375630994	2.69014971683624	0.00714199693382871	0.12108529329722	99.8734653304583	50.2604154180243	72.5104269581604	171.000433677235	125.370480325425	94.299311214824
FBgn0013981	3262.32522159715	-0.432970814987548	0.160972443390589	-2.68972009039443	0.0071511973608064	0.12108529329722	3836.80562644511	4954.51710447678	3770.54220182434	2819.76225328991	2964.44199387664	3523.7433793657
FBgn0038756	238.617727668694	-1.18958801013868	0.442437999155469	-2.68871121469987	0.00717284421876088	0.121216905105056	249.683663326146	156.580524956153	328.494206977121	82.5920461978481	82.0606780311872	158.090021742499
FBgn0051522	271.345053699376	0.476402710525772	0.177434714506951	2.68494647087286	0.0072541423314479	0.12235413426614	425.651197479811	247.435891288735	354.861634961906	567.674909078168	487.805141629835	368.876717399165
FBgn0002973	595.678994848143	0.416265029179975	0.15538137811619	2.67898916991651	0.00738447822412077	0.124131098294225	581.406244602311	488.105957425044	595.464415323075	834.063339772635	753.362613591871	630.973332393308
FBgn0023479	2068.5974482772	0.684832623435082	0.255645825712441	2.67883358363694	0.00738791016515931	0.124131098294225	3396.88679106095	2259.7856009104	3266.26514161532	5434.78929346967	5552.772546777	3353.17256643301
FBgn0262124	3130.20926618215	0.408984175298606	0.152748431935743	2.67750162876078	0.00741734919130328	0.124386525689859	3560.96462696098	2956.66559161031	3431.06156652023	4610.0320997475	4464.32883122445	4132.52863853199
FBgn0029067	352.619380221797	0.526020626607213	0.196526586912218	2.67658760512729	0.00743761188304256	0.124487385099891	244.927784024695	187.510011367245	263.674279847856	375.735646787394	317.98512737085	306.472761448178
FBgn0259174	1491.56269828438	0.343914614439364	0.128535310784958	2.67564307690312	0.0074586029672567	0.124600027007499	1288.84329069306	1075.76619923579	1379.89539787045	1739.08604318004	1661.72873013154	1346.53869396462
FBgn0029937	238.856437877812	-0.336542503436689	0.125872207498439	-2.67368396983793	0.00750231140729278	0.125019414040797	272.274090008035	295.763213806066	294.436279163439	226.837309980005	226.806596225087	230.201259730306
FBgn0266414	759.390153966271	0.474802575856372	0.177613379745466	2.67323653508988	0.00751232601252354	0.125019414040797	1353.04766126264	1112.49496434896	1335.94968456247	1875.18842916805	1845.22552406239	1560.09889877466
FBgn0039831	1099.04266047769	0.362064870368943	0.135672604940664	2.66866601792817	0.00761531327008683	0.126458631658451	1116.44266601548	844.761597602947	1011.85004891615	1321.47273916557	1363.11904062916	1131.59173457789
FBgn0030174	279.242219364615	0.488767598012051	0.183198320404503	2.66796986420426	0.00763111025284703	0.126458631658451	282.974818436299	205.87439392383	294.436279163439	446.695010422165	397.766342123393	249.615823803946
FBgn0030798	72.7258486233324	0.514887626259602	0.193023941582902	2.66748063497845	0.00764222931391351	0.126458631658451	127.219771313798	86.0226340808493	115.357497433437	174.490238446158	140.186991636611	152.543003435745
FBgn0259821	421.216319911566	0.449950060647257	0.16883880036116	2.66496835848618	0.00769955669190205	0.127166402300847	775.208326136415	585.727148910053	807.502482034059	1023.67606555079	1066.78881440543	868.108365007056
FBgn0284408	2142.23620947239	0.436936978485521	0.164028106511716	2.66379334479674	0.00772650125169513	0.12729221790869	3113.91197262465	2425.06504391967	3117.9483592009	4038.8673859004	3879.64650025224	3798.32078555004
FBgn0035914	168.804120510711	0.643291563832362	0.24153326023873	2.66336637528321	0.00773631311771943	0.12729221790869	288.919667563112	221.339137129376	298.830850494237	482.756326367704	465.010508843394	313.406534331621
FBgn0004618	88.1673770394426	0.423394207022464	0.159098889325861	2.66120152577107	0.00778623393262392	0.127872792987472	142.676379043512	159.480164307192	148.316782414419	219.857700442159	216.549011471188	166.410549202631
FBgn0053002	151.371614732615	-0.533423152317761	0.200621825337866	-2.65884906300412	0.00784080810892037	0.127927071166068	110.574193758722	148.84815335338	113.160211768038	81.4287779415404	93.4579944244076	83.2052746013153
FBgn0037534	453.382052137327	0.40802005585996	0.15352648922128	2.65765248674368	0.00786869843964607	0.127927071166068	684.846619408857	611.823903069411	609.746772148167	977.145335298485	870.754972442042	678.12298800072
FBgn0004607	986.878485630794	0.576876438516999	0.217073056044039	2.65752207588566	0.00787174347796645	0.127927071166068	1951.09948342003	1244.91182804645	1632.58324939131	2768.57845001237	2574.6537732285	1855.47762360933
FBgn0037963	810.908996630454	0.629939299459322	0.237132216251775	2.65648973984406	0.00789588536140163	0.127927071166068	637.287826394353	447.511006510486	675.665342110131	992.267822630485	937.999139162042	791.836863289184
FBgn0052207	163.026352518438	-1.08139269565277	0.407142495645863	-2.65605459321392	0.00790608141597436	0.127927071166068	16.6455775550764	17.3978361062392	17.5782853231904	3.48980476892316	11.3973163932204	9.70728203682012
FBgn0032374	233.082795282001	-3.47963667399891	1.31048976890156	-2.6552184966049	0.00792570535621529	0.127927071166068	0	0.966546450346621	6.5918569961964	0	0	0
FBgn0053158	369.348888118485	0.351769887382602	0.132530872651766	2.65424863161432	0.0079485236052716	0.127927071166068	299.620395991375	307.361771210226	354.861634961906	432.735791346472	373.83197769763	421.573391313331
FBgn0085390	172.116798413026	0.671661690471373	0.253151605000875	2.65319941569816	0.00797327499765431	0.127927071166068	311.510094245001	171.078721711352	236.208209030371	445.531742165857	410.303390155936	285.671442797849
FBgn0000411	55.2358652387917	0.661610795780581	0.249372829563074	2.65309896406834	0.0079756483053976	0.127927071166068	93.9286162036453	60.8924263718371	98.877854942946	122.143166912311	147.025381472544	130.354930208727
FBgn0067779	473.252902220663	0.406162534300673	0.153111890256045	2.65271713138318	0.00798467540071033	0.127927071166068	387.604163068207	346.990175674437	403.20191960068	571.164713847091	518.57789589153	414.639618429888
FBgn0026261	304.974448992759	-0.383585247110097	0.144604745250586	-2.6526463322167	0.00798635020395282	0.127927071166068	179.534443629753	147.881606903033	162.599139239511	116.326825630772	120.811553768137	138.675457668859
FBgn0024491	287.883041912396	-0.678446742220879	0.255777543434245	-2.65248752142814	0.00799010812724009	0.127927071166068	149.810197995688	278.365377699827	279.055279505648	100.041070042464	123.091017046781	221.880732270174
FBgn0052856	63.8240796376014	-0.666874963555973	0.251435702473132	-2.65226838112711	0.00799529622147276	0.127927071166068	47.558793014504	86.9891805311959	56.0307844676694	38.3878524581548	37.6111440976275	45.7629010307234
FBgn0000635	752.289752778976	0.540798266941448	0.203957003161472	2.65153075677082	0.00801278147403493	0.127927071166068	1064.12799369953	726.842930660659	1039.31611973363	1602.98365719204	1409.84803784137	1101.08313389074
FBgn0021764	965.407369442566	0.606087082771385	0.228595666051011	2.65134984071017	0.00801707528208727	0.127927071166068	795.420813167579	597.325706314212	838.264481349642	1301.69717880834	1115.79727489628	976.275221988766
FBgn0031896	415.42089399472	0.34570237496422	0.130440149319163	2.65027582970906	0.00804260798535302	0.127927071166068	297.24245634065	256.134809341855	275.759351007549	357.12335468647	380.670367533563	312.019779754932
FBgn0025525	310.040013520116	0.580070682843615	0.218885219370337	2.65011353673077	0.00804647253801385	0.127927071166068	513.634964556643	347.956722124784	443.851704410558	767.757049163095	656.485424249497	524.193229988286
FBgn0011725	649.751826998017	0.434079649007997	0.163871339936155	2.64890522758352	0.00807529734277398	0.127927071166068	392.360042369658	318.960328614385	446.048990075957	574.654518616014	517.438164252208	468.723046920743
FBgn0286786	1008.32207738122	-0.427272780595999	0.16131657042227	-2.6486602056909	0.00808115372055664	0.127927071166068	174.778564328302	176.878000413432	160.401853574112	138.428922500619	103.715579178306	140.062212245547
FBgn0052803	157.978497477191	-0.449148601353384	0.169581802812908	-2.64856602479282	0.00808340579172711	0.127927071166068	112.952133409447	128.550677896101	104.371069106443	76.7757049163095	88.8990678671194	88.7522929080697
FBgn0013334	1673.14637613081	0.591206575152062	0.223265563152339	2.64799715103698	0.00809702075710607	0.127927071166068	3061.59730030869	1981.42022321057	2664.20886929605	4430.88878827611	4254.61820958919	2921.89189308286
FBgn0020300	76.9762277863652	0.469546602911338	0.177365354428406	2.6473411587316	0.00811274622941279	0.12794415849527	86.7947972514697	104.387016637435	95.5819264448478	145.408532038465	128.789675243391	123.421157325284
FBgn0003371	1377.46686025062	0.426949057206352	0.161392565508792	2.64540721476475	0.00815926603356527	0.128318961790221	1915.43038865915	1356.06466983631	1672.13439136849	2483.57772721698	2255.52891421833	1902.62727921674
FBgn0261801	73.7756243873239	0.643710986351587	0.243356772282742	2.64513282418003	0.00816588563069281	0.128318961790221	89.1727369021949	43.494590265598	56.0307844676694	114.000289118157	98.0169209816958	79.0450108712495
FBgn0003655	975.167828944956	-1.45538561914502	0.550479309070674	-2.64385163104861	0.00819685772275562	0.128574409198772	3.5669094760878	6.76582515242635	23.0714994866874	6.97960953784632	3.41919491796613	1.38675457668859
FBgn0264443	131.383964760391	0.77379227855791	0.292887606406156	2.64194271670502	0.00824319963451217	0.128796949048002	243.738814199333	117.918666942288	199.952995551291	368.756037249547	349.897613271867	238.521787190437
FBgn0052016	1127.90212535093	0.468435301637509	0.177350335962138	2.6412992064335	0.00825887461884593	0.128796949048002	819.200209674831	587.660241810746	772.345911387678	1012.04338298772	1127.1945912895	872.268628737122
FBgn0052206	386.013230837073	0.966735040782956	0.366037638455872	2.64108096877994	0.0082641966272023	0.128796949048002	705.059106440021	291.89702800468	581.182058497983	1319.14620265295	1074.76693588069	687.83027003754
FBgn0265974	403.311455401135	0.736893156883558	0.279056841891801	2.64065611825879	0.00827456596074479	0.128796949048002	524.335692984906	314.127596362652	463.627275399147	882.92060653756	733.987175723396	550.54156694537
FBgn0033368	150.292730659481	0.600377902718014	0.227395268183504	2.64023920776363	0.00828475281732596	0.128796949048002	291.297607213837	175.911453963085	235.109566197672	403.654084938779	382.949830812207	274.577406184341
FBgn0027101	930.668546683133	0.530478875613757	0.20133744864068	2.63477499687842	0.00841930730045492	0.130656283985923	1178.26909693434	837.029226000174	1056.89440505682	1564.59580473388	1583.08724701832	1286.90824716701
FBgn0034128	185.145927121592	-0.517035263673671	0.19629245840023	-2.6340047289003	0.00843843126615457	0.130720875837575	367.391676037043	513.236165134056	335.086063973317	241.959797312006	267.83693524068	342.528380442081
FBgn0002921	4755.22296400939	0.561880843336043	0.21343036179562	2.63261908291239	0.00847293146378223	0.131023012741709	7530.9348738467	4958.38329027817	5748.09930068326	10097.168464751	9912.24606718382	6908.81130106255
FBgn0264000	147.527371031174	0.835093576347911	0.317287239491614	2.63197970925642	0.00848889325356691	0.131037915824053	269.89615035731	150.781246254073	231.813637699573	459.490961241549	406.88419523797	295.378724834669
FBgn0039126	204.101341824756	-0.382419386944068	0.145345542903204	-2.63110501571245	0.00851077329394563	0.131055284614549	112.952133409447	130.483770796794	140.626282585523	101.204338298772	95.7374577030517	98.4595749448898
FBgn0036381	1890.97968535377	0.355039001990464	0.134971467820508	2.63047448267076	0.00852657703919085	0.131055284614549	2425.4984437397	2529.45206055711	3130.03343036059	3183.86521751423	3888.76435336681	3267.19378267831
FBgn0002036	201.886524664018	-0.363108653366328	0.138115452771388	-2.62902264793899	0.00856306578125246	0.131055284614549	274.65202965876	310.261410561265	282.351208003746	205.898481366466	219.968206389154	251.002578380635
FBgn0027279	1506.32127888309	0.309862855560394	0.117893297124766	2.62833310389534	0.00858044483458595	0.131055284614549	2181.75962954037	1826.77279115511	2070.94173963837	2754.61923093668	2564.3961884746	2211.8735498183
FBgn0033907	137.479278158352	-0.502404412673953	0.191157604827459	-2.6282209024717	0.00858327570527736	0.131055284614549	112.952133409447	126.617584995407	84.5954981178538	66.3062906095401	85.4798729491533	77.658256294561
FBgn0037766	99.3247023497932	1.0072621490956	0.383417515124393	2.62706347353176	0.00861252670161572	0.131055284614549	174.778564328302	80.2233553787696	149.415425247118	364.102964224316	295.190494584409	151.156248859056
FBgn0003345	519.290931189776	0.46768932927829	0.17805253869101	2.62669284423915	0.00862191220778178	0.131055284614549	615.886369537826	472.641214219498	604.25355798467	870.124655718175	818.327317033228	649.001141890259
FBgn0005666	6623.02882920212	0.72010134482231	0.274205817797144	2.62613445114807	0.00863606975109307	0.131055284614549	7834.12217931417	5623.36724811664	7186.22276868678	14761.874172545	11269.6664496164	7972.4520613827
FBgn0031627	487.702616313368	0.611108167792038	0.23271525861527	2.62599097037438	0.00863971092822384	0.131055284614549	815.633300198743	616.656635321144	827.278053022648	1455.24858864096	1181.90170997696	811.251427362824
FBgn0050428	111.378494020003	0.385611630174547	0.146844911284754	2.62597884258167	0.00864001876364659	0.131055284614549	153.377107471775	114.052481140901	146.11949674902	181.469847984004	183.496793930849	171.957567509385
FBgn0011589	239.092401409802	0.646744483642262	0.246477259907789	2.62395193732768	0.00869160492314986	0.13160927593338	473.209990494315	285.131202852253	339.480635304115	636.307736200323	631.411328184412	447.921728270414
FBgn0052204	123.490012544472	0.895208753943483	0.341265575628228	2.62320262539084	0.00871074501676839	0.131670898289802	262.762331405134	100.520830836049	183.4733530608	385.041792837855	373.83197769763	255.1628421107
FBgn0039137	176.506747541344	0.395347246171929	0.150815859274196	2.62139040333387	0.00875719141743687	0.132144354774	143.865348868875	163.346350108579	163.697782072211	216.367895673236	205.151695077968	198.305904466468
FBgn0031730	24.2870378556002	0.787458991207406	0.300458984193026	2.62085353620683	0.00877099349537218	NA	60.6374610934926	36.7287651131716	25.2687851520862	76.7757049163095	61.5455085233904	72.1112379878066
FBgn0044020	229.885254125075	0.362536798456926	0.138387913782439	2.61971431281833	0.00880034568399056	0.132445780746973	212.825598739905	196.208929420364	247.194637357365	297.796673614776	280.373983273223	263.483369570832
FBgn0259938	922.379513717427	0.606245534818885	0.231473340344882	2.6190728224495	0.00881691233314234	0.132445780746973	1129.52133409447	788.701903482843	1244.76232944842	1742.57584794897	1670.84658324612	1399.23536787879
FBgn0266457	40.6390938397386	0.637690124320515	0.243553439703342	2.61827599354478	0.00883752943577821	0.132445780746973	46.3698231891414	27.0633006097054	42.8470704752766	59.3266810716937	64.9647034413565	54.083428490855
FBgn0031589	850.812562130238	0.237820344579231	0.090850663696775	2.61770618839929	0.00885229893960549	0.132445780746973	1092.66326950823	1023.57269091707	1209.60575880204	1342.41156777911	1319.80923833493	1256.39964647986
FBgn0038349	1706.41387519274	0.235531454299983	0.0899771555721164	2.61768059684	0.00885296279686763	0.132445780746973	2405.28595670854	2238.52157900278	2499.41244439114	2909.33390902561	2897.19782715664	2598.77807671441
FBgn0038128	84.1458187506961	-0.61451103174464	0.234842971799554	-2.61668904560255	0.00887871837721365	0.132604038396095	51.1257024905918	48.3273225173311	59.3267129657676	37.2245842018471	36.4714124583054	29.1218461104604
FBgn0283499	1132.04408726886	0.52722615665789	0.201587224311594	2.61537485055578	0.00891295778025703	0.132888245948986	1427.95276026048	949.148614240382	1547.98775127346	2202.06680919051	1896.51344783188	1554.55188046791
FBgn0052412	400.808418591427	-0.445160993297058	0.170347169335308	-2.61325735575218	0.00896837411306324	0.133365896036873	110.574193758722	166.245989459619	137.330354087425	109.347216092926	86.6196045884753	110.940366135087
FBgn0037546	113.419981030057	1.061873096289	0.406447478532372	2.6125714941652	0.00898638945463841	0.133365896036873	218.770447866718	76.3571695773831	156.007282243315	355.960086430162	327.102980485427	256.549596687389
FBgn0029882	554.840720172076	-0.420574380527913	0.161051221404013	-2.61143241796882	0.00901638067582452	0.133365896036873	191.424141883378	219.406044228683	215.333995209082	181.469847984004	135.628065079323	151.156248859056
FBgn0259108	1997.75139658741	0.920702336103579	0.352578207791964	2.61134215262343	0.00901876112806622	0.133365896036873	3341.0052092689	1711.75376356387	3456.33035167231	6874.91539477863	5833.14653005022	3397.54871288704
FBgn0023407	1586.90743863862	0.504542033538719	0.193255019676875	2.61075771476632	0.00903418734267037	0.133365896036873	2240.01915098314	1544.5412276539	2073.13902530377	3105.92624434161	2806.01929601087	2394.92515394119
FBgn0040726	216.725455119698	0.991769188804767	0.379891097295608	2.61066709871601	0.00903658125830709	0.133365896036873	385.226223417482	162.379803658232	328.494206977121	741.001879268018	599.498842283395	399.385318086314
FBgn0052512	97.8928500009126	0.847665866846757	0.32486770984403	2.60926475965779	0.00907370085062877	0.133687899379332	68.9602498710308	55.0931476697574	56.0307844676694	109.347216092926	120.811553768137	92.9125566381354
FBgn0085400	149.551303307822	0.589796922351865	0.226127559620118	2.60824873952866	0.00910067965266495	0.133859660143659	223.526327168169	155.613978505806	225.221780703377	346.653940379701	328.242712124749	231.588014306994
FBgn0037448	102.380828030752	0.561561361571629	0.215357578006218	2.60757650959194	0.00911856899396945	0.133897373613968	171.211654852214	143.0488746513	196.657067053193	296.633405358469	232.505254421697	223.267486846863
FBgn0052529	745.56641454202	0.501598476362934	0.192413577957375	2.60687671674633	0.00913722518063647	0.133946202018827	1341.15796300901	827.363761496708	1061.28897638762	1699.53492246558	1528.38012833086	1340.99167565787
FBgn0285955	1652.03089237934	0.420272606427789	0.161360383421413	2.60455879886078	0.00919926348616582	0.134505171691176	2445.71093077087	2058.7439392383	2636.74279847856	3692.2134455207	3204.92536977359	2655.63501435865
FBgn0036544	336.767221181709	0.726391404419288	0.278919747512298	2.60430253109727	0.00920614543565566	0.134505171691176	621.831218664639	361.488372429636	570.195630170989	1016.69645601295	939.138870801364	611.558768319668
FBgn0259111	626.538570649796	0.317139243782053	0.121866004097648	2.60236024090803	0.00925845428020029	0.135043597739749	1105.74193758722	835.096133099481	938.240979125288	1254.00318029972	1225.2115122712	1102.46988846743
FBgn0036576	247.547504037956	0.637569131826275	0.245148842847738	2.6007429789186	0.00930221181206102	0.135417170894985	349.557128656604	203.941301023137	303.225421825035	481.593058111396	495.783263105089	352.235662478902
FBgn0039900	898.340259343882	0.577138660647892	0.221953424390518	2.60026923320831	0.00931506463407185	0.135417170894985	1859.54880686711	1131.82589335589	1642.4710348856	2333.51612215329	2356.96503011799	2220.19407727843
FBgn0039802	398.705210055838	-0.383227726543866	0.147462801123557	-2.59880948702966	0.00935476754727758	0.135454887734031	457.753382764601	501.637607729896	398.807348269882	319.898770484623	348.757881632545	374.423735705919
FBgn0038092	51.1266088278097	0.560497995348353	0.215685455809376	2.59868238794795	0.00935823158673239	0.135454887734031	99.8734653304583	75.3906231270365	79.1022839543568	139.592190756926	135.628065079323	97.0728203682012
FBgn0261800	488.25536315387	0.38348492954474	0.147588468562556	2.59833937759303	0.00936758592206339	0.135454887734031	618.264309188552	561.563487651387	567.99834450559	768.920317419403	740.825565559329	769.648790062167
FBgn0261649	215.266545597014	0.765861684932322	0.294800680654926	2.59789659654412	0.00937967346676077	0.135454887734031	420.89531817836	199.108568771404	340.579278136814	639.797540969246	553.909576710513	436.827691656905
FBgn0051092	1225.91218451203	0.340647982422075	0.131189943456479	2.59660133579585	0.00941511290436828	0.135699526940869	1068.88387300098	916.286034928597	983.285335265963	1295.8808375268	1202.41687948476	1259.17315563324
FBgn0052103	1318.29340794599	0.272175205339681	0.104838287402879	2.59614318472936	0.00942767687456882	0.135699526940869	1658.61290638083	1434.35493231439	1732.55974716695	2220.67910129144	1875.99827832408	1725.1226934006
FBgn0265597	432.918785186873	0.562364230162206	0.216788909575815	2.59406365050024	0.00948489255681174	0.136235086138208	840.601666531358	534.500187041682	693.243627433322	1306.35025183357	993.845989488822	750.234225988526
FBgn0085409	233.014408245152	0.675442128995458	0.260420590914974	2.59365869120536	0.00949607044273416	0.136235086138208	428.029137130536	275.465738348787	406.497848098778	652.593491788631	620.014011791192	497.844893031203
FBgn0266137	95.8922929271322	0.784608902889388	0.30275113938545	2.59159686230101	0.00955316443814789	0.136829504419833	196.180021184829	111.152841789861	131.837139923928	275.69457674493	288.352104748477	189.985377006337
FBgn0083956	2352.50976268625	0.5547814120291	0.214287434119701	2.58895914409614	0.00962665152793813	0.137274540172732	4834.35130992433	2881.27496848328	3785.92320148213	6679.48632771893	6049.69554152141	4161.65048464245
FBgn0031835	709.117729142797	0.74267119816152	0.286869795328649	2.58887903242197	0.00962889131144967	0.137274540172732	1411.30718270541	757.772417071751	1185.43561648265	2213.69949175359	2059.49507225493	1336.8314119278
FBgn0053533	235.185811170684	-1.80496682530237	0.697224026745969	-2.5887903400667	0.00963137153781442	0.137274540172732	1.1889698253626	10.6320109538128	13.1837139923928	2.32653651261544	1.13973163932204	4.16026373006577
FBgn0036790	47.2958753096733	0.988151870594398	0.382048730686521	2.58645505461762	0.0096968815992369	0.137949064189889	87.9837670768324	27.0633006097054	57.1294273003688	146.571800294773	118.532090489493	73.4979925644952
FBgn0000489	297.956172472525	0.347540603955005	0.134394192266564	2.58597933507183	0.00971027520622434	0.137949064189889	411.383559575459	345.057082773744	393.314134106385	525.79725185109	475.268093597292	459.015764883923
FBgn0052220	107.246135195166	-0.497305969234472	0.192432106333764	-2.58431910718641	0.00975714724008207	0.138378939215136	221.148387517443	282.231563501213	229.616352034175	132.61258121908	174.378940816273	214.946959386731
FBgn0036851	98.368427438333	0.808953313897765	0.313114113667481	2.5835734596009	0.00977826411889058	0.138378939215136	186.668262581928	98.5877379353554	159.303210741413	294.306868845853	304.308347698986	177.504585816139
FBgn0052699	537.720064097841	0.340068201585468	0.131644649342361	2.58322843567362	0.00978804903684952	0.138378939215136	361.44682691023	319.926875064732	481.205560722337	482.756326367704	477.547556875936	510.325684221401
FBgn0264699	40.7645439890557	0.880599579421279	0.341112676788459	2.58155043580331	0.00983576182814343	0.138828838598529	40.4249740623284	24.1636612586655	46.1429989733748	55.8368763027706	52.427655408814	95.6860657915126
FBgn0046692	841.419148660582	0.358642086714286	0.138982850530387	2.58047727000586	0.00986638512066631	0.139036462579454	802.554632119755	689.147619097141	750.37305473369	1007.39030996249	918.623701293567	947.153375878306
FBgn0263413	473.175129273792	0.601572583000986	0.233504089605336	2.57628285662043	0.00998689113759394	0.140507999789305	825.145058801644	485.206318074004	734.992055075899	1233.06435168618	1033.73659686509	833.439500589842
FBgn0034057	315.243750786835	-0.332031135254938	0.128972416214479	-2.57443525523143	0.0100403876169526	0.1410335476034	343.612279529791	358.588733078596	328.494206977121	253.592479875083	278.094519994579	288.444951951226
FBgn0266429	151.480893169069	0.945592253012913	0.367802315735946	2.57092522955124	0.0101427222694416	0.142242318568397	296.053486515287	132.416863697487	214.235352376383	549.062616977244	429.678828024411	256.549596687389
FBgn0004045	266807.998766188	0.41905804157706	0.16303581473278	2.5703434687888	0.0101597729062073	0.142253102374252	416554.389345961	333219.788396349	416432.875234879	547749.287115872	570072.111087739	441456.678433892
FBgn0036534	1340.03415141336	0.51399803149789	0.200187623767172	2.56758146095832	0.0102410723783091	0.143077418832815	1224.63892012348	1000.37557610875	1274.4256859313	1825.16789414681	1807.61437996476	1361.79299430819
FBgn0051548	472.582389942872	-0.35067214606297	0.136595421541721	-2.56723206462569	0.0102513979843588	0.143077418832815	588.540063554487	716.210919706846	546.025487851602	454.837888216319	514.018969334242	483.977347264317
FBgn0052333	242.721961462595	0.44816910044119	0.174655500333722	2.56601767241715	0.0102873586735015	0.143350323333944	476.776899970402	350.856361475824	480.106917889638	667.715979120631	576.704209496954	536.674021178484
FBgn0053554	2735.8485120231	0.701274380782524	0.273394084602124	2.56506786459226	0.0103155626698733	0.143469059080481	2479.00208588102	1398.59271365156	2119.28202427714	3343.23296862839	3289.26551108342	3116.03753381926
FBgn0034476	178.630301065244	0.4640939180274	0.180959720808751	2.5646255197193	0.0103287213187161	0.143469059080481	330.533611450803	256.134809341855	296.633564828838	456.001156472626	389.788220648139	370.263471975853
FBgn0004449	1984.63923262396	0.539627208028374	0.21056114990599	2.56280519112525	0.0103830288825785	0.143987193798583	3478.92570901097	2538.15097861023	3137.72393018949	4969.48199094658	4428.99715040546	3906.48764253175
FBgn0065098	16738.0136621251	-0.563004745298171	0.219728717788027	-2.56227201872312	0.0103989835512082	0.143987193798583	14961.996282363	23598.2315852128	15961.0830734569	10567.1288402993	11047.4187799486	15293.1294717218
FBgn0020269	189.150699790836	0.734657762234312	0.286833265034821	2.56127113480065	0.010428992957777	0.144174227012812	378.092404465307	170.112175261005	295.534921996139	495.552277187089	532.254675563394	373.03698112923
FBgn0259246	745.205438061942	0.718765856696993	0.28073262088343	2.56032182663749	0.0104575271478001	0.144340307567661	1397.03954480105	786.76881058215	1137.09533184388	2312.57729353975	1962.61788291256	1187.06191764543
FBgn0051363	700.293227758494	0.265588640524514	0.103769866740345	2.55940042005715	0.0104852890804321	0.144495221917564	494.611447350841	443.644820709099	489.994703383933	590.940274204322	596.079647365429	525.579984564975
FBgn0265082	1385.77120067734	0.403668664888608	0.157903708539206	2.556422953096	0.0105754488038161	0.145119154274525	2423.12050408898	1625.73112948302	2291.76894901095	3118.722195161	2873.26346273087	2390.76489021113
FBgn0033317	616.211258945533	-0.310196276128287	0.121352617526397	-2.55615645093781	0.0105835521937565	0.145119154274525	381.659313941394	418.514613000087	369.143991786999	329.204916535085	287.212373109155	328.660834675196
FBgn0026400	310.84828529708	-0.327940657496245	0.128296442378888	-2.55611653305058	0.0105847664312347	0.145119154274525	191.424141883378	223.27223003007	208.742138212886	157.041214601542	159.562429505086	183.051604122894
FBgn0034893	155.318387790093	-0.48235491434851	0.188768617740883	-2.55527068069452	0.0106105250358344	0.145119154274525	124.841831663073	137.24959594922	105.469711939142	87.245119223079	88.8990678671194	87.3655383313811
FBgn0029895	422.48531689581	0.54182085497363	0.212048898527905	2.5551693912823	0.0106136133205244	0.145119154274525	652.744434124067	457.176471013952	646.001985627247	948.063628890792	918.623701293567	686.443515460851
FBgn0039702	145.610145815769	-0.491727005184381	0.192931309641123	-2.54871542674466	0.0108120486127013	0.147601357389331	78.4720084739316	105.353563087782	91.1873551140502	57.0001445590783	71.8030932772888	67.9509742577408
FBgn0031708	240.374013988581	-0.39167431200828	0.153731658943002	-2.54777912826335	0.0108411085665587	0.147615136447617	266.329240881222	320.893421515078	304.324064657734	210.551554391697	226.806596225087	244.068805497192
FBgn0036317	218.334330296606	0.558480168652264	0.219232211305196	2.54743664412889	0.0108517555971669	0.147615136447617	228.282206469619	144.981967551993	236.208209030371	326.878380022469	311.146737534918	256.549596687389
FBgn0038652	461.476621247731	0.471516346166744	0.185122433265343	2.54705136406079	0.0108637441611328	0.147615136447617	708.626015916109	502.604154180243	665.777556615837	978.308603554793	992.7062578495	626.813068663242
FBgn0038397	97.5080126407565	0.804076221486039	0.315827185200108	2.54593733271116	0.010898475164588	0.147857107939449	179.534443629753	94.7215521339689	196.657067053193	357.12335468647	305.448079338308	156.703267165811
FBgn0029117	154.156812149356	-0.461021112067796	0.181320039127024	-2.54258224456276	0.0110036701467636	0.149052815615928	122.463892012348	148.84815335338	126.343925760431	86.0818509667713	101.436115899662	102.619838674956
FBgn0000527	572.709432991742	-0.45352529640728	0.178517900337451	-2.54050319631804	0.0110693081879506	0.149596171086369	1279.33153209016	1360.89740208804	1097.5441898667	696.797685528324	910.645579818313	1124.65796169445
FBgn0036518	473.812671528665	0.43728318117093	0.172143290372195	2.54022785451277	0.0110780270908642	0.149596171086369	555.248908444334	384.685487237955	532.841773859209	724.71612367971	694.096568347125	571.342885595698
FBgn0039818	83.2620076285434	2.40568882393213	0.947873399796149	2.53798537278238	0.0111492644250735	0.150133213258573	1.1889698253626	1.93309290069324	0	9.30614605046176	2.27946327864409	5.54701830675435
FBgn0037326	277.438650967083	0.797138155690804	0.31409966975224	2.53785098315953	0.0111535464993087	0.150133213258573	472.021020668952	234.870787434229	464.725918231846	798.002023827096	737.406370641362	497.844893031203
FBgn0031662	344.084422565834	-0.327446504196031	0.129050307270231	-2.53735547882393	0.0111693474439822	0.150133213258573	324.58876232399	360.52182597929	290.041707832642	259.408821156622	253.020423929494	266.256878724209
FBgn0259242	179.573104400185	0.819181491885881	0.322976171949054	2.53635271897116	0.01120138490407	0.150332565141105	369.769615687768	148.84815335338	286.745779334543	573.491250359706	499.202458023055	345.301889595459
FBgn0266521	1752.39299642431	0.472265376824069	0.186345551297838	2.53435283823462	0.0112655234498854	0.150877043020858	914.317795703839	606.024624367332	930.550479296392	1221.43166912311	1274.21997276205	900.003720270894
FBgn0004117	695.631912699737	-0.361446309501493	0.142637971282408	-2.53401185008351	0.0112764918270139	0.150877043020858	1033.2147782401	1110.56187144827	966.805692775472	789.859146032942	798.951879164753	833.439500589842
FBgn0010300	1118.80401165727	0.726902907752173	0.28692990553581	2.53338147654829	0.0112967936747412	0.150917563205221	781.153175263228	369.220744032409	717.413769752709	1101.61503872341	1062.22988784814	924.965302651289
FBgn0035588	281.25592669332	-0.391992362457012	0.15493774102731	-2.52999921037907	0.0114062783356356	0.152116706956596	321.021852847902	370.187290482756	277.956636672948	237.306724286775	272.395861797969	228.814505153617
FBgn0003028	502.382130830159	0.742608462476665	0.293606798155079	2.52926181254301	0.0114302727497653	0.152116706956596	186.668262581928	136.283049498874	175.782853231904	329.204916535085	266.697203601358	237.135032613749
FBgn0082582	639.848852497131	0.233856068380074	0.092469759579644	2.52900050181977	0.0114387863649403	0.152116706956596	770.452446834964	780.002985429723	848.152266843937	966.675920991716	955.095113751873	897.230211117517
FBgn0005427	586.175378822111	0.472876542185936	0.187161239261352	2.52657304499684	0.0115181433441701	0.152738038368022	782.34214508859	511.303072233363	791.022839543568	1012.04338298772	990.426794570856	887.522929080697
FBgn0036850	114.220666201102	-0.708472997103645	0.280416556091107	-2.52650202605535	0.011520472391499	0.152738038368022	42.8029137130536	36.7287651131716	24.1701423193868	15.1224873320004	30.7727542616952	16.6410549202631
FBgn0036225	38.6054715054666	0.606087683757371	0.24005251800726	2.5248128567393	0.0115759915794204	0.153241573377872	36.8580645862406	35.762218662825	36.2552134790802	57.0001445590783	58.1263136054242	49.9231647607892
FBgn0266465	313.751731442835	0.286640663707145	0.113587835897841	2.5235154930229	0.0116187940663688	0.153493189721128	303.187305467463	289.963935103986	344.973849467612	375.735646787394	416.002048352546	349.462153325524
FBgn0030929	806.640619716489	-2.31901955815744	0.919088808447182	-2.52317244736716	0.0116301352404014	0.153493189721128	137.920499742062	101.487377286395	284.548493669145	2.32653651261544	56.9865819661022	45.7629010307234
FBgn0011818	380.23450603623	0.454670015547384	0.180241116425827	2.52256546432617	0.0116502263156128	0.153526436379349	335.289490752253	209.740579725217	285.647136501844	410.633694476625	398.906073762715	324.50057094513
FBgn0085422	102.501068773489	0.659789306643738	0.261691400752741	2.52124947455625	0.0116938912223572	0.153854654153717	192.613111708741	115.985574041595	175.782853231904	290.81706407693	281.513714912545	189.985377006337
FBgn0033538	439.861923917115	0.671901748610042	0.266547871691165	2.52075450592433	0.0117103519528696	0.153854654153717	590.918003205212	378.886208535876	553.715987680498	831.73680326002	869.61524080272	723.885889031443
FBgn0038475	255.649484804279	0.360940290292376	0.143268945348622	2.51931979686238	0.0117581809862214	0.154251092006932	256.817482278321	249.368984189428	280.153922338347	374.572378531086	377.251172615597	253.776087534012
FBgn0262617	427.430936814675	0.548777828163577	0.218063245122131	2.51659938315703	0.0118493476490279	0.154366428296079	656.311343600155	384.685487237955	546.025487851602	912.002312945253	741.965297198651	664.255442233834
FBgn0038301	96.8500516417025	-0.550758560964349	0.218858556330258	-2.51650458725156	0.0118525357260458	0.154366428296079	71.338189521756	85.0560876305027	93.384640779449	46.5307302523088	66.1044350806785	58.2436922209207
FBgn0034072	559.565460585953	0.404884777225237	0.160967607070752	2.51531835872589	0.0118924940870468	0.154366428296079	594.4849126813	442.678274258753	488.896060551233	710.756904604017	690.677373429159	615.719032049733
FBgn0040071	416.197300285018	0.471313747754979	0.18742024719901	2.51474296293356	0.01191191940466	0.154366428296079	670.578981504506	490.039050325737	718.512412585408	971.328994016946	910.645579818313	719.725625301377
FBgn0004403	4678.5212511559	-0.400979934755088	0.159464754629724	-2.51453642960892	0.0119188988122001	0.154366428296079	4952.05932263523	6077.64407977955	4277.01654769877	3700.35632331486	4090.49685352682	3802.48104928011
FBgn0032330	381.090251489743	0.607138924340305	0.241522747197492	2.51379603530201	0.011943948860061	0.154366428296079	425.651197479811	313.161049912305	486.698774885834	649.103687019708	654.205960970853	561.635603558878
FBgn0037138	1136.01162884617	0.224210409141183	0.0891953250878312	2.51370135060779	0.0119471557280835	0.154366428296079	1545.66077297138	1327.06827632591	1411.75604001873	1657.6572652385	1762.02511439188	1579.5134628483
FBgn0029858	107.67154358735	-0.515213965336207	0.204979705524104	-2.51348768415331	0.0119543951845781	0.154366428296079	83.2278877753819	89.8888198822358	71.411784125461	50.020535021232	55.8468503267801	66.5642196810523
FBgn0031738	621.624844939464	0.561879391853246	0.22354581765688	2.51348648676431	0.0119544357655228	0.154366428296079	757.373778755976	440.745181358059	737.189340741298	1059.73738149633	1028.03793866848	765.488526332101
FBgn0260945	974.774851819335	0.531115888183515	0.21131231278445	2.51341666363419	0.0119568023661004	0.154366428296079	1257.93007523363	909.520209776171	1324.96325623548	1877.51496568066	1659.4492668529	1507.4022248605
FBgn0050460	269.070321042217	0.346387855058651	0.137822842574229	2.51328334685953	0.0119613221879873	0.154366428296079	451.808533637788	373.086929833796	458.13406123565	596.75661548586	549.350650153225	481.20383811094
FBgn0267666	43.1905684713576	0.768705925467492	0.306008133254923	2.51204409925639	0.0120034087794568	0.154681095141761	91.5506765529202	51.2269618683709	72.5104269581604	153.551409832619	113.973163932204	97.0728203682012
FBgn0028841	61.270972010761	0.559859738272891	0.222996544487253	2.5106206894829	0.0120519117196669	0.154932010634506	93.9286162036453	83.1229947298094	82.398212452455	138.428922500619	126.510211964747	116.487384441841
FBgn0264979	436.816234416727	-0.507267987002882	0.202064001844345	-2.51043225103323	0.012058345797352	0.154932010634506	316.265973546451	433.979356205633	382.327705779391	245.449602080929	249.601229011528	303.699252294801
FBgn0033579	51.6870315669569	0.612286150934649	0.243958727525809	2.5097940014049	0.0120801609380881	0.15498438489879	85.6058274261072	59.9258799214905	84.5954981178538	143.08199552585	109.414237374916	97.0728203682012
FBgn0020251	1058.57184112774	0.516435194938042	0.205887408500201	2.50833792459696	0.0121300600942424	0.155346413254829	1487.40125152861	1116.36115015035	1598.52532157763	2349.8018777416	2151.81333504002	1506.01547028381
FBgn0032723	428.550925249266	0.605651928939494	0.241494378635655	2.50793385900401	0.01214393959632	0.155346413254829	294.864516689925	203.941301023137	313.113207319329	483.919594624012	435.377486221021	313.406534331621
FBgn0052000	2810.56446265118	0.536463811652787	0.214014084525731	2.50667526318011	0.0121872621282812	0.155447742913223	3662.02706211681	2496.58948124532	3476.1059226609	4869.44092090412	5025.07679777089	4077.05845546445
FBgn0038292	419.385451467966	-1.51064965272458	0.602651993037277	-2.50666996903326	0.0121874446486847	0.155447742913223	9.51175860290079	44.4611367159446	63.7212842965652	8.14287779415404	10.2575847538984	23.574827803706
FBgn0264491	644.39078233659	0.430044385771729	0.17163599834947	2.50556054619795	0.012225746463023	0.155708960418996	832.27887775382	618.589728221838	895.393908650011	1184.20708492126	1069.06827768408	904.16398400096
FBgn0015600	1249.83766298768	0.657204159765259	0.262405483501183	2.50453668496716	0.0122611889349936	0.155933053457116	1718.06139764896	1060.30145603024	1618.30089256622	2718.55791499114	2408.25295388748	1804.16770427185
FBgn0030613	703.314854000907	0.508489564913183	0.203228238547052	2.5020615665842	0.0123472451065336	0.156522208236498	1417.25203183222	965.579903896275	1292.00397125449	1907.75994034466	1857.76257209493	1458.8658146764
FBgn0031170	804.6914032513	0.374633049653659	0.149754351171063	2.50165051448635	0.0123615884623519	0.156522208236498	1026.08095928792	792.568089284229	1010.75140608345	1343.57483603542	1196.71822128815	1124.65796169445
FBgn0030262	960.704710429466	-0.943921284805333	0.377344020590744	-2.50148732535259	0.0123672869167544	0.156522208236498	1287.6543208677	2519.78659605364	1523.81760895407	680.511929940016	821.746511951194	1270.26719224675
FBgn0027556	566.257598656195	0.509675369442746	0.203816564089744	2.50065725383501	0.0123963084872063	0.156522208236498	639.665766045078	433.979356205633	571.294273003688	925.961532020945	870.754972442042	540.83428490855
FBgn0030066	153.938143669132	-0.417763761693625	0.167063074094691	-2.50063494855145	0.0123970891724456	0.156522208236498	166.455775550764	190.409650718284	131.837139923928	103.530874811387	133.348601800679	130.354930208727
FBgn0053180	727.841917185995	0.361700693763391	0.144842960379555	2.49719208179375	0.0125181129000823	0.15766926322775	570.705516174048	506.47033998163	654.791128288843	821.26738895325	731.707712444752	669.802460540588
FBgn0000047	64.9253199840264	0.922282189536965	0.369352486578715	2.49702444967949	0.0125240321254502	0.15766926322775	28.5352758087024	29.9629399607453	39.5511419771784	63.9797540969246	58.1263136054242	63.7907105276751
FBgn0032124	40.7175910088672	-1.01040383864402	0.405261424244678	-2.49321494274271	0.0126592186792882	0.159141861296318	16.6455775550764	19.3309290069324	15.3809996577916	8.14287779415404	9.11785311457635	8.32052746013153
FBgn0039647	319.572801675198	0.805290351788156	0.32317511755429	2.49180802619458	0.012709471067409	0.159544035511425	655.122373774792	315.094142812999	482.304203555037	1016.69645601295	939.138870801364	579.66341305583
FBgn0042693	1391.16989786909	0.324734565723251	0.13039412973472	2.49040786102799	0.0127596575221292	0.15994422922646	1586.08574703371	1217.84852743674	1510.63389496168	1999.65813259297	1891.95452127459	1506.01547028381
FBgn0036191	372.730600227645	0.37871252386944	0.152216856078913	2.48798019894135	0.0128470885677659	0.160809473949242	202.124870311642	180.744186214818	227.419066368776	285.000722795391	260.998545404748	245.45556007388
FBgn0016061	260.198491453566	0.795122382409761	0.319896444942766	2.48556179657458	0.0129347127782502	0.161674657430002	472.021020668952	244.536251937695	430.667990418165	800.328560339712	726.009054248142	461.7892740373
FBgn0010313	483.131460712131	0.498819059371928	0.200769656709936	2.48453410513423	0.0129721081692579	0.161910441535437	669.390011679143	433.979356205633	539.433630855406	864.308314436636	859.357656048821	593.530958822716
FBgn0024320	1068.62039217829	0.344746714596641	0.138785682528188	2.4840221867023	0.0129907713950103	0.161911662449527	1310.24474754958	1149.22372946213	1442.51803933431	1846.10672276035	1640.07382898442	1465.79958755984
FBgn0264953	833.759856120492	0.394266537883902	0.158753407130435	2.48351544077391	0.0130092694333945	0.161911662449527	1090.2853298575	976.211914850088	1315.07547074118	1658.82053349481	1472.53327800408	1310.48307497072
FBgn0031653	972.931235566858	3.35323222543412	1.35173906452672	2.48068012046998	0.013113199254209	0.162371557976128	0	0	0	5.8163412815386	0	0
FBgn0002719	4278.48152415221	0.33003690125855	0.133053222977891	2.48048783691163	0.0131202739989689	0.162371557976128	5688.03164453468	5217.41773897106	5495.4114491624	7175.03860490602	8008.894229516	5427.75741315914
FBgn0285991	2908.42230830012	-0.321193375029583	0.129543923024828	-2.47941676868951	0.0131597439223833	0.162371557976128	3706.01894565522	4738.97724604948	4303.38397568355	2953.5381027653	3335.99450829562	3918.96843372195
FBgn0029594	242.245950204919	-0.337720053408996	0.136276756242617	-2.47819263328917	0.013204983063856	0.162371557976128	209.258689263817	240.670066136309	208.742138212886	176.816774958773	172.099477537629	173.344322086074
FBgn0000319	4914.33946749107	0.24193279856308	0.0976306566213117	2.4780412929259	0.0132105855372203	0.162371557976128	5312.31717972009	4746.70961765226	5445.97252169093	6492.20013845339	6100.9834652909	5738.39043833738
FBgn0034644	1098.8447420677	0.445438515186364	0.179760632738698	2.47795364535604	0.0132138311260979	0.162371557976128	1665.746725333	1290.33951121274	1757.82853231904	2350.9651459979	2322.77308093833	1741.76374832087
FBgn0260942	481.597300829051	0.290707799152308	0.11732718490823	2.47775312583944	0.0132212590138905	0.162371557976128	793.042873516854	664.017411388129	670.172127946634	946.900360634484	875.31389899933	775.195808368921
FBgn0027053	385.223020409815	-0.326268485522526	0.131711038562581	-2.47715369253204	0.013243485969038	0.162371557976128	241.360874548608	271.599552547401	227.419066368776	184.959652752928	210.850353274578	195.532395313091
FBgn0038924	694.519450365095	-0.284112512100646	0.114700544746793	-2.47699357250515	0.0132494287991183	0.162371557976128	756.184808930613	895.022013020971	698.736841596819	630.491394918784	648.507302774243	653.161405620325
FBgn0250910	200.775085529895	0.72470314055406	0.292709811396128	2.47584164363151	0.0132922519962181	0.162371557976128	397.115921671108	198.142022321057	342.776563802213	643.287345738169	532.254675563394	371.650226552542
FBgn0032518	8514.28221210641	-0.408921066808288	0.165213343188003	-2.4751092067846	0.0133195440773841	0.162371557976128	8888.73841441079	10566.2857951893	8202.46738893372	6528.26145439893	7025.30582478108	7279.0747730384
FBgn0266406	95.453192046938	0.586026689126535	0.236821598030263	2.47454917119361	0.0133404455432582	0.162371557976128	104.629344631909	117.918666942288	146.11949674902	183.79638449662	202.872231799324	166.410549202631
FBgn0025519	194.100567963405	-0.372790317469944	0.150652066438153	-2.47451180912267	0.0133418409893151	0.162371557976128	146.2432885196	181.710732665165	176.881496064603	132.61258121908	123.091017046781	135.901948515482
FBgn0037081	424.321046544117	0.327421013196503	0.13232194367432	2.47442717439501	0.0133450025117377	0.162371557976128	387.604163068207	335.391618270278	438.358490247061	528.123788363705	498.062726383733	427.120409620085
FBgn0038237	448.657717385289	0.575218833037615	0.232483742405574	2.47423250798385	0.0133522767707621	0.162371557976128	738.350261550174	505.503793531283	763.556768726083	1091.14562441664	1081.60532571662	815.41169109289
FBgn0286213	7208.77706213006	-0.429812768206345	0.17374410268621	-2.4738265158997	0.0133674590867971	0.162371557976128	5971.00646297097	7965.30929730651	5565.72459045516	4476.25625027211	5009.12055482038	4993.70323065561
FBgn0016930	729.252591076498	0.528446809730986	0.213620359832459	2.47376612484617	0.0133697187493839	0.162371557976128	1061.7500540488	727.809477111006	950.326050284981	1372.65654244311	1400.73018472679	1175.96788103192
FBgn0039617	82.3833924342746	0.835035733412544	0.33768256985793	2.47284227244498	0.0134043288069088	0.162371557976128	155.755047122501	63.792065722877	126.343925760431	236.143456030467	232.505254421697	145.609230552302
FBgn0028539	904.951391408417	0.236649859045843	0.0957036662990545	2.4727355617324	0.0134083315811774	0.162371557976128	808.499481246567	866.025619510573	929.451836463693	1081.83947836618	980.169209816958	1006.78382267592
FBgn0261574	1996.39494077193	0.564152348757386	0.228172630204778	2.47248036826799	0.0134179083047687	0.162371557976128	1507.61373855978	1187.885587476	1571.05925076014	2690.63947683976	2126.73923897493	1487.98766078686
FBgn0026380	1036.0439434396	-0.377089775065893	0.152706505203967	-2.46937597427314	0.0135348928095502	0.162392941740995	506.501145604467	666.917050739169	573.491558669087	451.348083447395	398.906073762715	497.844893031203
FBgn0038049	489.286469126719	-0.335975346839018	0.136070662898583	-2.46912405423811	0.0135444254577577	0.162392941740995	372.147555338494	388.551673039342	291.140350665341	282.674186282776	271.256130158646	280.124424491095
FBgn0261260	3816.65519760276	0.555948051415456	0.225198066439531	2.46870703734366	0.0135602184045277	0.162392941740995	6360.98856568991	3945.44261031491	5818.41244197602	8936.22674495591	8279.01062803533	6487.23790974922
FBgn0032066	192.378576143738	3.35212988309082	1.35793187518312	2.46855526728009	0.0135659701617097	0.162392941740995	0	0	0	5.8163412815386	0	0
FBgn0050361	190.746106632421	0.994185081572778	0.402836691889601	2.46796059442679	0.0135885277505606	0.162392941740995	347.179189005879	150.781246254073	262.575637015157	575.817786872322	571.005551300344	366.103208245787
FBgn0036146	118.480910538069	-0.44363587147008	0.179776542591305	-2.46770721627804	0.0135981491487945	0.162392941740995	216.392508215993	279.331924150174	231.813637699573	147.73506855108	169.820014258985	220.493977693486
FBgn0016650	147.356589815726	0.381582165768633	0.154642894823354	2.46750532059367	0.0136058199376379	0.162392941740995	277.029969309486	210.707126175563	246.095994524666	340.837599098162	310.007005895596	302.312497718112
FBgn0030251	1371.4569737136	-0.421028762373542	0.170651663388309	-2.4671822941187	0.0136181008992072	0.162392941740995	2716.79605095354	3160.60689263345	2882.83879300323	1811.20867507112	2163.21065143324	2571.04298518064
FBgn0031216	856.041033142841	0.487089979787783	0.197440974378624	2.46701568061406	0.013624439111356	0.162392941740995	778.775235612503	627.288646274957	776.740482718476	1170.24786584557	1106.6794217817	779.356072098987
FBgn0040687	2216.96727518328	-1.17870742649969	0.477822795194195	-2.46682962461145	0.0136315200231607	0.162392941740995	2766.73278361877	1568.70488891257	4025.4273390106	934.104409815099	1113.51781161764	1646.07768252935
FBgn0029979	1257.83908457964	0.673286590637799	0.273002482579464	2.46622882061822	0.0136544076000115	0.162392941740995	1045.10447649372	610.857356619065	872.322409163324	1554.12639042711	1473.6730096434	1001.23680436916
FBgn0039927	1090.02040442005	0.418380033618088	0.169648572202473	2.46615711636381	0.0136571414335526	0.162392941740995	1942.77669464249	1628.63076883406	1844.62131610229	2549.88401782652	2547.30021388477	2138.3755572538
FBgn0023095	860.472557124092	0.454108437945562	0.184161427389547	2.46581732332585	0.0136701031342369	0.162392941740995	1103.36399793649	814.798657642202	1153.57497433437	1522.71814750681	1450.87837685696	1231.43806409947
FBgn0013433	73.9963363932425	0.774844934529006	0.314267201999513	2.46556092904091	0.0136798907086382	0.162392941740995	133.164620440611	71.52443732565	116.456140266136	222.184236954775	197.173573602714	127.58142105535
FBgn0032456	2053.06061895885	0.370250971909632	0.150230913212559	2.4645458380844	0.0137187014975683	0.16263269333006	1884.51717319972	1513.61174124281	1934.71002838364	2619.68011320499	2225.89589159595	2044.07624603898
FBgn0033438	611.348785439944	0.602435711760988	0.244704776917781	2.46188782805577	0.0138207884135587	0.163620905649407	1041.53756701764	615.690088870798	852.546838174735	1601.82038893573	1284.47755751594	920.805038921223
FBgn0034731	85.186804171435	0.629606284493999	0.255871189824817	2.46063765492731	0.0138690356793614	0.16385054603878	164.077835900039	96.6546450346621	131.837139923928	222.184236954775	211.9900849139	170.570812932696
FBgn0034718	369.581834336512	0.368716467493718	0.149859538842017	2.46041373370581	0.0138776930375068	0.16385054603878	387.604163068207	356.655640177903	441.654418745159	493.225740674473	525.416285727462	511.712438798089
FBgn0262901	10.5744350290992	-1.04996493370401	0.426963708164057	-2.45914327992619	0.0139269023684158	NA	19.0235172058016	22.2305683579723	16.479642490491	13.9592190756926	6.83838983593226	6.93377288344294
FBgn0033159	334.285959174982	0.644760898055518	0.262198189597966	2.45905930565021	0.013930160420766	0.164248058834322	596.862852332025	398.217137542808	487.797417718534	912.002312945253	796.672415886109	607.398504589602
FBgn0040503	52.0678246577364	0.541425712836671	0.220290909536774	2.45777601070865	0.0139800337574488	0.164572718701222	55.8815817920422	59.9258799214905	64.8199271292646	89.5716557356945	79.7812147525431	94.299311214824
FBgn0013749	1046.0991488955	-0.501351247908708	0.20401842101925	-2.45738225697475	0.0139953679747062	0.164572718701222	826.334028627007	1184.98594812496	869.026480665226	632.8179314314	616.594816873226	787.676599559118
FBgn0265416	129.10660917278	0.504695763095505	0.20548031917571	2.45617568203177	0.0140424489265364	0.164763157672074	233.038085771069	148.84815335338	216.432638041782	324.551843509854	313.426200813562	206.6264319266
FBgn0034394	1131.16394831611	0.542775875963667	0.22103775733769	2.45557990861462	0.0140657477128854	0.164763157672074	1693.09303131634	1406.32508525433	1446.91261066511	2508.00636059944	2382.03912618307	1730.66971170736
FBgn0035010	61.9707635817331	0.864585644078167	0.352120101575794	2.45537144914194	0.0140739079473207	0.164763157672074	105.818314457271	67.6582515242635	91.1873551140502	207.061749622774	181.217330652205	91.5258020614469
FBgn0015268	4902.93658551367	-0.251882730764017	0.102598329717226	-2.45503734279337	0.0140869953967082	0.164763157672074	2660.9144691615	2847.44584272115	2484.03144473334	2232.31178385451	2190.56421077697	2290.91856068955
FBgn0039883	560.627654548178	0.895080852954382	0.36483212338624	2.45340471844026	0.0141511023480519	0.164866562851316	1027.26992911329	433.979356205633	864.631909334428	1765.84121307512	1612.72026964069	944.379866724929
FBgn0039051	102.206637009207	-0.694193904511831	0.282999375968742	-2.4529874037196	0.0141675299651784	0.164866562851316	39.2360042369658	67.6582515242635	57.1294273003688	29.081706407693	29.6330226223731	44.3761464540348
FBgn0004378	293.009745986524	-1.46101602478475	0.595632463806828	-2.45288179130978	0.0141716900707904	0.164866562851316	3.5669094760878	8.69891805311959	14.2823568250922	2.32653651261544	2.27946327864409	5.54701830675435
FBgn0035272	236.33166085765	-0.386860105811384	0.157728399586878	-2.45269784531288	0.0141789383343228	0.164866562851316	152.188137646413	199.108568771404	177.980138897303	123.306435168618	136.767796718645	146.99598512899
FBgn0030304	625.278438312052	-0.389083062814314	0.158653184274136	-2.45241256640661	0.0141901860208527	0.164866562851316	1334.02414405684	1446.92003616889	1399.67096885904	843.369485823097	1028.03793866848	1324.3506207376
FBgn0033853	957.058661746238	0.226647280906916	0.0924379729728065	2.45188501670835	0.0142110064553695	0.164889194423059	1097.41914880968	1089.29784954064	1274.4256859313	1390.10556628773	1396.1712581695	1260.55991020993
FBgn0264386	847.579117678708	0.663719014756706	0.270804172724951	2.45091871398462	0.0142492127565074	0.164994542080772	1739.46285450548	866.025619510573	1305.18768524689	2467.29197162867	2273.76462044748	1450.54528721626
FBgn0033033	198.920061148199	0.416263650269079	0.169854969289303	2.45070045351504	0.014257855015564	0.164994542080772	386.415193242845	284.164656401907	355.960277794606	492.062472418166	462.73104556475	411.866109276511
FBgn0259935	145.35945336555	0.596657915426766	0.243649338559345	2.44883864226638	0.0143317636036386	0.165436763468696	269.89615035731	146.915060452686	249.391923022764	380.388719812625	360.155198025766	263.483369570832
FBgn0032162	179.193143789261	-0.424574628834442	0.17338182392973	-2.44878395676884	0.014333939561154	0.165436763468696	152.188137646413	183.643825565858	134.034425589327	119.816630399695	118.532090489493	112.327120711776
FBgn0260986	198.249835725065	-3.25969015923043	1.33151227241912	-2.44811123919133	0.0143607311105296	0.165527318882187	1.1889698253626	0	5.493214163497	0	0	0
FBgn0037130	212.370418080099	0.48864533701596	0.199695785488872	2.44694867154915	0.014407135488601	0.165811597683016	435.162956082711	268.699913196361	371.341277452397	563.021836052937	537.953333760005	403.545581816379
FBgn0032596	969.798448518667	-0.4205406344798	0.171900070255769	-2.44642502969359	0.0144280800371637	0.165811597683016	482.721749097215	662.084318487436	459.232704068349	365.266232480624	355.596271468478	481.20383811094
FBgn0033891	114.828434252864	-0.422767557071485	0.172865784382231	-2.445640463683	0.0144595112484227	0.165811597683016	104.629344631909	121.784852743674	104.371069106443	91.8981922483099	77.501751473899	77.658256294561
FBgn0264090	240.558672692852	0.848647757445055	0.347011774697802	2.44558778497965	0.0144616238194207	0.165811597683016	200.935900486279	125.651038545061	207.643495380187	390.858134119394	335.081101960681	234.361523460371
FBgn0051690	127.927686389315	0.514851296572337	0.210562570241844	2.44512258746177	0.0144802914265723	0.165811597683016	262.762331405134	159.480164307192	206.544852547487	335.021257816623	308.867274256274	251.002578380635
FBgn0039868	226.021996216317	-0.482172822185424	0.197235903600231	-2.44465035718202	0.0144992629769742	0.165811597683016	98.6844955050957	123.717945644368	96.6805692775472	59.3266810716937	93.4579944244076	76.2715017178724
FBgn0262743	1859.89434548744	0.606349892320575	0.248106516722405	2.4439095769459	0.0145290675096833	0.165935245532161	986.844955050957	601.191892115598	994.271763592957	1511.08546494373	1374.51635702238	1042.83944166982
FBgn0004876	951.922765357421	0.551098945922041	0.225672015574741	2.44203493516244	0.0146047332528758	0.166581663747227	930.963373258915	712.34473390546	1037.11883406823	1440.12610130896	1349.4422609573	1135.75199830795
FBgn0083987	4623.10329196025	-0.612045122219118	0.25078151361068	-2.44055119297698	0.0146648672807641	0.166878978538663	7495.26577908583	8989.84853467393	4687.90896712834	4397.15400884318	4490.54265892885	4965.96813912184
FBgn0002938	6397.74126320304	0.28203131529903	0.115565319176641	2.44044941257807	0.0146690002881645	0.166878978538663	11190.5839963128	11171.3438731062	12198.2313714614	15687.8357045659	14376.5748984083	11953.8244510556
FBgn0011829	24.8197050188276	0.582989837661471	0.23898205623217	2.43947117558943	0.0147087760483768	NA	47.558793014504	34.7956722124784	39.5511419771784	61.6532175843092	63.8249718020345	55.4701830675435
FBgn0032871	63.5848763171108	-0.607181020677727	0.248905246503555	-2.43940627691452	0.0147114182306778	0.167143902576634	59.44849126813	88.9222734318892	52.7348559695712	45.3674619960011	30.7727542616952	58.2436922209207
FBgn0032150	36.9234260717041	-0.751061698876817	0.307966754604349	-2.43877524975616	0.0147371306921191	NA	32.1021852847902	29.9629399607453	26.3674279847856	15.1224873320004	19.3754378684747	18.0278094969517
FBgn0266354	623.22329327874	0.996800776462573	0.408877147469026	2.43789799120061	0.0147729421478846	0.167624929280608	1234.15067872638	425.280438152513	948.128764619583	2103.18900740436	1868.02015684883	1230.05130952278
FBgn0038295	168.598527276562	0.826513392097825	0.339205076929174	2.43661857770602	0.0148253078614702	0.16800092708906	342.423309704429	123.717945644368	266.970208345954	566.51164082186	429.678828024411	300.925743141424
FBgn0030574	534.127941784459	0.421052086441415	0.173080825522554	2.43269053732672	0.0149871038735846	0.16950653136496	970.199377495881	704.612362302687	816.291624695654	1181.88054840864	1107.81915342103	1042.83944166982
FBgn0004915	332.953321824545	-0.27925032294482	0.114826981603324	-2.43192252418082	0.0150189195166288	0.16950653136496	253.250572802234	286.0977493026	244.997351691966	188.449457521851	215.409279831866	246.842314650569
FBgn0262801	560.066484617075	-0.325117953213524	0.133717264993856	-2.43138351078645	0.0150412841519087	0.16950653136496	548.115089492158	635.987564328077	527.348559695712	432.735791346472	488.944873269157	445.148219117037
FBgn0262739	1495.56008375162	0.618291740326417	0.254328914039324	2.43107136544773	0.0150542490317102	0.16950653136496	2074.75234525774	1155.02300816421	1621.59682106432	2870.94605656745	2715.98049650443	1856.86437818602
FBgn0028888	205.801888317433	0.757146252707035	0.311448362957899	2.4310490686682	0.0150551754995089	0.16950653136496	404.249740623284	192.342743618978	338.381992471415	658.40983307017	506.040847858987	413.252863853199
FBgn0260446	186.050786027387	0.869379897471038	0.357850210856668	2.4294519636856	0.0151216686050711	0.170036059977485	337.667430402978	176.878000413432	304.324064657734	602.572956767399	539.093065399327	352.235662478902
FBgn0265042	32.9181499900214	0.603816387162426	0.248720478421733	2.4276906790867	0.015195296845708	NA	39.2360042369658	26.0967541593588	35.1565706463808	60.4899493280015	42.1700706549156	48.5364101841006
FBgn0085376	198.936830672701	0.561158095228264	0.231213475890048	2.42701292849868	0.0152237133384592	0.170644156776339	258.006452103684	202.97475457279	269.167494011353	393.184670632009	392.067683926783	289.831706527915
FBgn0260934	2798.11928124337	0.385149379129663	0.158710653229421	2.42673929753737	0.0152351992955961	0.170644156776339	3618.03517857839	2954.73249870962	3677.15756104489	4954.35950361458	4516.75648663326	3912.03466083851
FBgn0038585	320.378668724613	-0.387074185201929	0.159523652155647	-2.42643758446717	0.0152478728742061	0.170644156776339	122.463892012348	154.647432055459	176.881496064603	116.326825630772	100.29638426034	133.128439362105
FBgn0031808	99.5629333573972	-0.423164295170087	0.174427220408888	-2.42602212073388	0.0152653397864033	0.170644156776339	254.439542627596	234.870787434229	236.208209030371	151.224873320004	196.033841963392	194.145640736402
FBgn0039257	74.1711692351792	0.618424545214481	0.254933128360016	2.42583044892127	0.0152734039829572	0.170644156776339	97.4955256797331	77.3237160277297	114.258854600738	186.122921009235	160.702161144408	94.299311214824
FBgn0033649	122.131404117615	0.372782887869035	0.153726997805181	2.42496694264116	0.0153097807590909	0.170674095058471	114.14110323481	130.483770796794	157.105925076014	188.449457521851	184.636525570171	145.609230552302
FBgn0034275	192.763615331733	-0.378410614083719	0.156055937964208	-2.42483957368228	0.015315152858629	0.170674095058471	243.738814199333	290.930481554333	258.181065684359	193.102530547082	180.077599012883	239.908541767126
FBgn0031768	178.595089851575	-0.400096021125433	0.165049773790084	-2.42409312014138	0.0153466697490541	0.170701768144047	192.613111708741	156.580524956153	156.007282243315	118.653362143387	135.628065079323	127.58142105535
FBgn0036690	402.631500075705	1.23862919558345	0.511016090070831	2.42385556864123	0.0153567116586038	0.170701768144047	4.7558793014504	3.86618580138648	5.493214163497	12.7959508193849	5.69865819661022	15.2543003435745
FBgn0003943	2713.73097128859	0.222295555080977	0.0917584515053984	2.42261667927012	0.0154091764807945	0.17106731246849	2513.48221081653	2301.34709827531	2549.95001469531	2870.94605656745	2998.6339430563	2718.03897030963
FBgn0030671	174.994013759204	-0.372461153376248	0.153887301264889	-2.42035015439724	0.0155055683413373	0.171918972840437	183.10135310584	180.744186214818	186.769281558898	146.571800294773	120.811553768137	159.476776319188
FBgn0021765	1201.04536990245	-0.303108432246832	0.125280730741338	-2.41943378245971	0.0155446906389325	0.172133289989728	1400.60645427714	1146.32409011109	1129.40483201498	966.675920991716	1021.19954883255	990.142767755652
FBgn0263490	758.231606900059	0.534072937229044	0.220784792003729	2.41897520378135	0.0155643011436289	0.172133289989728	678.901770282044	492.938689676777	610.845414980867	1034.14547985756	892.40987358916	651.774651043637
FBgn0015269	801.558925317289	0.574785580400834	0.23769033366745	2.41821184535426	0.0155969934289711	0.172276778241367	1036.78168771619	652.418853983969	961.312478611975	1599.49385242312	1323.22843325289	1022.03812301949
FBgn0038976	377.577760500813	-0.38934304088844	0.161076429824754	-2.41713229745676	0.0156433302714825	0.1725704249772	189.046202232653	264.833727394974	237.30685186307	155.877946345235	188.055720488137	185.825113276271
FBgn0262003	19.1028668724042	-1.26867796363971	0.52531139695693	-2.41509697103283	0.0157310209854184	NA	13.0786680789886	28.029847060052	8.7891426615952	4.65307302523088	4.55892655728818	12.4807911901973
FBgn0264907	140.605550406949	0.385509501711604	0.159681450920745	2.41424097469496	0.0157680300091863	0.173726706418992	208.069719438455	134.34995659818	180.177424562702	236.143456030467	230.225791143053	212.173450233354
FBgn0267252	5850.40529479765	0.281409154111149	0.116635962517402	2.41271343792584	0.0158342634024648	0.17423672461881	10598.4770232822	10174.8344827989	9992.15656340105	13356.6461189252	13365.6329343296	10665.5294493119
FBgn0004861	134.835995379245	0.40697621776149	0.168737689533934	2.41188686941007	0.0158702050090189	0.174412554923016	202.124870311642	170.112175261005	254.885137186261	282.674186282776	270.116398519324	277.350915337718
FBgn0031298	590.922776273917	-0.221382023426999	0.0918177431846654	-2.41110286256712	0.0159043621877239	0.174568357329326	853.680334610346	939.483149736916	859.138695170931	728.205928448633	739.685833920007	811.251427362824
FBgn0039972	2203.31779866362	0.717402224659522	0.297822213807551	2.40882711698294	0.0160038770562975	0.175440243213138	53.503642141317	31.8960328614385	72.5104269581604	114.000289118157	80.9209463918651	62.4039559509865
FBgn0020307	114.512029478902	0.508528504928503	0.211253239403443	2.40719861321196	0.016075424668906	0.175728015075236	139.109469567424	106.320109538128	149.415425247118	194.265798803389	202.872231799324	162.250285472565
FBgn0036732	528.476557791595	0.411337131322307	0.170887392603086	2.40706540755587	0.0160812894233522	0.175728015075236	838.223726880633	638.887203679117	786.628268212771	1126.04367210587	1074.76693588069	805.70440905607
FBgn0002562	98.2061945771068	1.74209283865148	0.723804035941943	2.40685703884527	0.0160904672153129	0.175728015075236	101.062435155821	66.6917050739169	157.105925076014	197.755603572312	732.847444084074	155.316512589122
FBgn0029512	505.239262805109	-0.377273513647157	0.15681563461011	-2.40584119424808	0.0161352769979896	0.175997397167834	139.109469567424	169.145628810659	154.908639410615	116.326825630772	134.488333440001	105.393347828333
FBgn0283478	1529.42545620044	-0.306444607332249	0.127479157479046	-2.40388008041722	0.0162220937799253	0.176655742520112	1034.40374806546	1176.28703007184	1049.20390522793	905.022703407406	828.584901787126	904.16398400096
FBgn0034068	665.432505988508	0.253257492332662	0.105370380682803	2.40349793453859	0.0162390587506233	0.176655742520112	468.454111192864	439.778634907713	578.984772832584	620.021980612015	605.197500480005	543.607794061927
FBgn0033029	1194.45982802085	0.311123522716882	0.129467026939047	2.40311012056651	0.0162562912883336	0.176655742520112	972.577317146606	817.698296993242	967.904335608172	1216.77859609788	1181.90170997696	1019.26461386611
FBgn0011747	3797.1820310779	0.353587840369542	0.147182799632387	2.40237202480647	0.0162891330194499	0.176769110882943	4218.4649403865	3563.65676242799	4295.69347585466	5441.76890300752	5459.31455235259	4527.75369288824
FBgn0051145	1331.41746456464	0.429610692993091	0.178857881119404	2.40196680349964	0.0163071882078119	0.176769110882943	2247.15296993531	1669.22571974861	2106.09831028475	3158.27331587546	2783.22466322443	2166.11064878758
FBgn0030594	495.021432240493	0.604436313536334	0.251766592923342	2.4007804471516	0.0163601490746454	0.177123447912239	23.779396507252	24.1636612586655	24.1701423193868	41.8776572270779	36.4714124583054	30.5086006871489
FBgn0043364	602.025304593573	0.240297102021347	0.100128024786884	2.39989855520273	0.0163996160195123	0.177330996488216	794.231843342216	670.783236540555	759.162197395286	889.900216075406	945.977260637296	784.903090405741
FBgn0013765	966.321656574254	0.324404250510098	0.13521997390386	2.39908529150247	0.0164360857802715	0.177505663117716	995.167743828496	852.49396920572	985.482620931362	1247.02357076188	1225.2115122712	1071.96128778028
FBgn0261929	111.575411666494	0.948003318539021	0.395550142729956	2.39667039934865	0.0165447986983895	0.178459143491147	222.337357342806	88.9222734318892	162.599139239511	405.980621451394	295.190494584409	210.786695656665
FBgn0001122	746.197625757431	0.689088190529938	0.287591466997448	2.3960661897387	0.0165720974068526	0.178533187476783	1209.18231239376	638.887203679117	1012.94869174885	1726.29009236066	1673.12604652476	1210.63674544914
FBgn0085420	94.7465292898123	0.834148736836108	0.348200046810205	2.39560202382966	0.0165930956800824	0.178539257336059	179.534443629753	90.8553663325824	146.11949674902	282.674186282776	274.675325076613	183.051604122894
FBgn0004914	968.643126905881	0.374822915981748	0.156594615638332	2.39358750908417	0.0166845007571197	0.179301947250867	1265.06389418581	1028.40542316881	1267.83382893511	1768.16774958773	1546.61583456001	1299.38903835721
FBgn0259098	44.4005050626143	-0.479675488703607	0.200472383509826	-2.39272602193657	0.0167237239912498	0.179502673847112	86.7947972514697	100.520830836049	82.398212452455	73.2859001473864	58.1263136054242	62.4039559509865
FBgn0039209	1357.72312715507	0.485143863836674	0.203053638936155	2.38923993866081	0.0168832720752951	0.180992819781415	2022.43767294178	1319.33590472314	1936.90731404904	2658.06796566314	2630.50062355528	2096.77291995315
FBgn0261963	28.7941687115505	0.633347022379418	0.26546989271448	2.3857583845133	0.0170439447091815	NA	23.779396507252	26.0967541593588	30.7619993155832	48.8572667649242	42.1700706549156	33.2821098405261
FBgn0034662	865.651758318656	1.98180149591206	0.830825839312444	2.38533926382467	0.0170633771913321	0.182464289852853	2.3779396507252	0	2.1972856653988	15.1224873320004	1.13973163932204	0
FBgn0036825	8180.59380917251	-0.359583527647446	0.150764040959784	-2.38507488495459	0.0170756450834871	0.182464289852853	8250.26161819108	9648.06666735997	7047.79377176665	6309.56702221307	6523.82390347938	6610.6590670745
FBgn0260499	352.070706327102	0.810103590789333	0.339691364691588	2.38482244470607	0.0170873662132313	0.182464289852853	687.224559059582	375.986569184836	495.48791754743	1089.98235616033	1016.64062227526	624.039559509865
FBgn0031116	146.678460489663	0.757021020541614	0.317480720047954	2.38446296967976	0.0171040692903155	0.182464289852853	248.494693500783	152.714339154766	282.351208003746	404.817353195087	429.678828024411	318.953552638375
FBgn0034791	296.63323855661	-0.322364260336369	0.135246450479825	-2.38353213110355	0.0171473874756307	0.182526366288449	202.124870311642	238.736973235615	175.782853231904	169.837165420927	168.680282619663	155.316512589122
FBgn0085407	315.549034022149	0.897516980631188	0.376563665879919	2.38344020401956	0.017151670679045	0.182526366288449	576.650365300861	282.231563501213	464.725918231846	1003.90050519356	943.697797358652	515.872702528155
FBgn0040011	1363.18438124376	0.31735525286677	0.133203182160732	2.38249002552978	0.0171959978267854	0.18260024957219	733.594382248724	733.608755813086	769.04998288958	946.900360634484	975.61028325967	862.561346700302
FBgn0037015	59.1987338445291	0.657806794931578	0.276111498921091	2.3823955087056	0.0172004126585684	0.18260024957219	87.9837670768324	88.9222734318892	108.765640437241	167.510628908312	162.981624423052	119.260893595219
FBgn0085383	303.423654475009	0.875466219241645	0.36776081270582	2.38053155473623	0.0172876803534806	0.182917296830899	596.862852332025	252.268623540468	442.753061577858	1046.94143067695	855.938461130855	464.562783190677
FBgn0034753	4091.03966542933	-0.307385697981277	0.129161793911177	-2.37985002122735	0.0173196856070472	0.182917296830899	2855.90552052096	3507.59706830789	2663.11022646335	2388.18973019975	2321.633349299	2587.68404010091
FBgn0000719	646.691590089313	0.320211841362122	0.134557905645149	2.37973264987174	0.0173252026837523	0.182917296830899	670.578981504506	598.292252764559	702.032770094917	846.85929059202	816.047853754583	795.99712701925
FBgn0010762	468.310732411632	0.665416587927894	0.279663371266297	2.37934837485128	0.0173432764344221	0.182917296830899	525.524662810269	379.852754986222	463.627275399147	803.818365108635	755.642076870515	610.172013742979
FBgn0026262	1045.7972409491	0.514581242842869	0.216392852330729	2.37799556362609	0.0174070353438004	0.182917296830899	973.766286971969	645.653028831543	900.887122813508	1342.41156777911	1273.08024112272	981.822240295521
FBgn0053926	4003.16964318548	-0.603371693055632	0.253758668114537	-2.37773825634714	0.0174191856472895	0.182917296830899	5248.11280915051	7671.47917640113	5333.91095275559	3492.13130543578	3924.0960341858	4599.86493087605
FBgn0032138	1910.87730912339	-0.262077479015502	0.110222895484609	-2.37770454008892	0.0174207783131986	0.182917296830899	1680.01436323735	2021.04862767479	1799.57695996162	1470.37107597296	1504.4457639051	1615.56908184221
FBgn0033268	1085.0370169632	-0.690995906035327	0.290635323258631	-2.3775358696521	0.0174287477710486	0.182917296830899	1896.40687145335	2820.38254211144	2400.53458944819	861.981777924021	1400.73018472679	2148.08283929062
FBgn0023096	50.5111916317534	0.821577448870553	0.345611110098116	2.37717314306625	0.0174458969584705	0.182917296830899	78.4720084739316	60.8924263718371	85.6941409505532	211.714822648005	116.252627210848	67.9509742577408
FBgn0004183	171.10577233213	-0.917617067451339	0.386063611168039	-2.37685459314614	0.0174609697374469	0.182917296830899	147.432258344962	292.863574455026	97.7792121102466	53.5103397901551	111.69370065356	120.647648171907
FBgn0266100	261.546848912666	0.813930814888252	0.342474802853824	2.3766151790024	0.0174723055749814	0.182917296830899	521.957753334181	242.603159037002	403.20191960068	817.777584184327	736.26663900204	496.458138454515
FBgn0039431	276.427670799772	0.811976147037097	0.341693121429807	2.37633155633746	0.0174857429571831	0.182917296830899	362.635796735593	167.212535909965	277.956636672948	588.613737691706	483.246215072547	343.91513501877
FBgn0011300	438.817459549775	0.498809750145445	0.209938592791662	2.37597929714834	0.017502444792335	0.182917296830899	474.398960319677	329.592339568198	498.783846045528	685.165002965247	604.057768840683	549.154812368681
FBgn0053143	125.837749381209	0.61309308109823	0.25813605350661	2.37507730039939	0.0175452753739611	0.183145843419711	255.628512452959	149.814699803726	181.276067395401	348.980476892316	324.823517206783	220.493977693486
FBgn0004882	778.163286191851	0.881461766414253	0.371435538185525	2.37312178236962	0.017638447209671	0.183898703187226	326.966701974715	116.952120491941	224.123137870678	476.939985086165	469.569435400682	281.511179067783
FBgn0039163	347.927228820926	-0.329117601444729	0.138734070993251	-2.3722910968333	0.0176781567775618	0.183905552437095	215.20353839063	235.837333884576	219.72856653988	179.143311471389	165.261087701696	191.372131583025
FBgn0013679	6470.0339651667	-0.726440164832178	0.306227028512716	-2.3722274560817	0.0176812022487307	0.183905552437095	6796.15152177262	16268.9098522343	9195.64050969398	6404.95501923031	4997.72323842716	8097.25997328467
FBgn0051183	373.756230101519	0.302760813197196	0.127718305037786	2.3705357905245	0.0177623241239659	0.184315119579484	620.642248839277	532.567094140988	578.984772832584	720.063050654479	731.707712444752	682.283251730786
FBgn0032881	190.754720154817	-0.335884968739705	0.141692138962719	-2.3705264893212	0.0177627710525266	0.184315119579484	237.79396507252	286.0977493026	258.181065684359	193.102530547082	201.732500160002	227.427750576929
FBgn0040384	589.313381231608	0.247800526626206	0.104598954984	2.3690535595132	0.0178336706990258	0.184734865047166	517.201874032731	442.678274258753	507.572988707123	618.858712355707	609.756427037294	507.552175068023
FBgn0051450	214.694106662217	-0.510275008364612	0.215450095609448	-2.36841393326462	0.0178645363196853	0.184734865047166	97.4955256797331	112.119388240208	94.4832836121484	51.1838032775397	74.0825565559329	90.1390474847583
FBgn0013686	82309.1395552783	-0.685204347346663	0.289314729703084	-2.36837007244625	0.0178666545684852	0.184734865047166	80578.8630044741	128974.991787803	109295.186282602	47426.4468096658	54998.8899871246	95874.6644139423
FBgn0036665	42.7991652534328	0.753043461385166	0.318113840336252	2.36721376407007	0.0179225776607807	0.185024947537967	52.3146723159544	43.494590265598	65.918569961964	118.653362143387	98.0169209816958	54.083428490855
FBgn0002566	929.499658895793	0.308195355191132	0.130240963087344	2.36634732948378	0.0179645818907776	0.185024947537967	948.797920639354	928.851138783103	894.295265817312	1163.26825630772	1168.2249303051	1099.69637931405
FBgn0030272	745.359801222847	-0.393677052748381	0.166365087171373	-2.36634416175824	0.017964735618295	0.185024947537967	1325.7013552793	1701.12175261005	1283.2148285929	984.124944836331	1115.79727489628	1182.90165391537
FBgn0011281	550.196334252692	-0.430793805018358	0.18207363077606	-2.36604171170843	0.017979418617344	0.185024947537967	1438.65348868875	1549.37395990563	1348.03475572216	1074.85986882833	1016.64062227526	1126.04471627113
FBgn0027287	654.888507499972	0.334885219787853	0.141602825163196	2.36496142927869	0.0180319487954627	0.18532331070714	684.846619408857	575.09513795624	736.090697908598	888.736947819098	841.121949819668	784.903090405741
FBgn0010350	1576.8873246076	0.335494975437301	0.141883914041579	2.36457372707511	0.018050834086274	0.18532331070714	2286.38897417228	2306.17983052704	2296.16352034175	3280.41648278777	3081.83435272681	2326.97417968345
FBgn0083981	20.3425884727085	1.1353914063707	0.480202278609079	2.36440237155766	0.0180591864721605	NA	26.1573361579772	14.4981967551993	40.6497848098778	60.4899493280015	82.0606780311872	34.6688644172147
FBgn0035211	114.777543178417	-0.439662825031878	0.186011176364445	-2.36363660305261	0.0180965537203026	0.185563510124714	99.8734653304583	112.119388240208	96.6805692775472	68.6328271221555	69.5236299986447	91.5258020614469
FBgn0038948	400.996108403271	-0.349713042390169	0.147981324725027	-2.36322416385981	0.0181167075811355	0.185563510124714	249.683663326146	323.793060866118	250.490565855463	203.571944853851	206.29142671729	239.908541767126
FBgn0259749	984.105929315748	-0.20936892904343	0.0886654969172651	-2.36133486330985	0.0182092797957624	0.186275023452831	878.648700942961	969.446089697661	898.68983714811	725.879391936017	816.047853754583	837.599764319908
FBgn0052479	937.638525170386	0.592151144124222	0.250811891961047	2.36093727252848	0.0182288136719893	0.186275023452831	954.742769766167	570.262405704507	951.424693117681	1421.51380920803	1220.65258571391	1088.60234270054
FBgn0035725	94.7332015299271	-0.664850168086533	0.281764725131206	-2.35959333723176	0.0182949779171838	0.186732736054246	43.9918835384162	32.8625793117851	31.8606421482826	17.4490238446158	31.9124859010172	18.0278094969517
FBgn0040389	152.442636097935	-0.418316756202129	0.177351245842655	-2.35869082404561	0.0183395281074508	0.186747460437494	103.440374806546	95.6880985843155	99.9764977756454	68.6328271221555	77.501751473899	77.658256294561
FBgn0037670	138.69579348231	-0.433126382269034	0.183643580120925	-2.35851632811684	0.0183481525872604	0.186747460437494	98.6844955050957	102.453923736742	91.1873551140502	77.9389731726173	74.0825565559329	63.7907105276751
FBgn0013811	77.415701067405	-0.486001885349724	0.206084443500996	-2.35826575307405	0.0183605434949991	0.186747460437494	143.865348868875	174.944907512738	164.79642490491	91.8981922483099	113.973163932204	141.448966822236
FBgn0034877	1489.9633900151	-0.330593740949269	0.14023209588452	-2.35747557550241	0.018399665669368	0.186787090844455	1701.41582009388	1887.66521752695	1523.81760895407	1258.65625332495	1392.75206325154	1415.87642279905
FBgn0023175	1102.87597903644	-0.295665385150988	0.125424181469718	-2.35732361723542	0.0184071975754922	0.186787090844455	584.973154078399	642.753389480503	575.688844334486	454.837888216319	484.385946711869	532.513757448418
FBgn0030039	189.442269974222	-0.387094098038843	0.164347600796813	-2.35533768769413	0.0185058797857694	0.187570616807735	127.219771313798	179.777639764472	120.850711596934	94.2247287609253	127.649943604069	106.780102405021
FBgn0086674	189.499403672886	0.623494233089033	0.264844673974342	2.35418830113773	0.0185632048625084	0.187832208877054	265.14027105586	175.911453963085	264.772922680555	416.450035758164	362.43466130441	306.472761448178
FBgn0016970	94.6790673846526	-0.61770548776223	0.262411377567388	-2.3539584811013	0.0185746856437879	0.187832208877054	32.1021852847902	40.5949509145581	37.3538563117796	24.4286333824621	19.3754378684747	29.1218461104604
FBgn0002645	1364.16873468316	0.325947334531589	0.138571149509992	2.35220199647752	0.0186626371540863	0.188347429659455	1198.4815839655	964.613357445928	1204.11254463854	1555.28965868342	1358.56011407188	1303.54930208727
FBgn0035102	106.497975597451	-0.455561159928024	0.193708537057522	-2.35178669380351	0.0186834855616503	0.188347429659455	108.196254107997	124.684492094714	114.258854600738	82.5920461978481	76.3620198345769	95.6860657915126
FBgn0035194	75.5653558252832	-1.12944377150086	0.480276975885641	-2.35165087690939	0.0186903080593737	0.188347429659455	13.0786680789886	15.4647432055459	14.2823568250922	6.97960953784632	2.27946327864409	11.0940366135087
FBgn0004552	91.7184258238006	0.704016078363344	0.299451232391005	2.35102080810302	0.018721986857555	0.188449307804675	133.164620440611	93.7550056836223	149.415425247118	237.306724286775	219.968206389154	153.929758012433
FBgn0036580	206.366569817101	-0.429241729375901	0.182632082839147	-2.3503084600637	0.0187578590798343	0.188593112520727	89.1727369021949	119.851759842981	124.146640095032	87.245119223079	85.4798729491533	74.8847471411838
FBgn0033341	100.698736764055	-0.446464218009033	0.190167439773834	-2.34774269738296	0.0188875637835372	0.189672359638251	97.4955256797331	123.717945644368	88.9900694486514	74.4491684036941	72.9428249166108	81.8185200246267
FBgn0000036	298.285208089262	0.988332931107438	0.421046014784672	2.34732759936674	0.0189086214083686	0.189672359638251	634.909886743628	199.108568771404	436.161204581662	1014.36991950033	953.955382112551	549.154812368681
FBgn0032414	39.5483826165765	0.535980537360741	0.228561240610409	2.34501937392936	0.0190260909326333	0.190489708771904	59.44849126813	50.2604154180243	81.2995696197556	96.5512652735408	95.7374577030517	83.2052746013153
FBgn0050431	175.499412529872	0.361889574507083	0.15433246072	2.34487011234562	0.0190337090257379	0.190489708771904	318.643913197177	270.633006097054	274.66070817485	419.939840527087	374.971709336952	312.019779754932
FBgn0003870	637.678052491274	0.397874186491287	0.169762069886629	2.34371663091171	0.0190926710259677	0.190859141014155	508.879085255192	486.17286452435	546.025487851602	674.695588658478	689.537641789837	665.642196810523
FBgn0052137	293.603001893694	0.372023875462931	0.158778361438829	2.34303888824458	0.0191273893195342	0.190859141014155	332.911551101528	260.000995143241	305.422707490433	469.960375548319	397.766342123393	289.831706527915
FBgn0040754	207.508369699753	-0.415412701363529	0.177309485692186	-2.34286789418981	0.0191361574371523	0.190859141014155	229.471176294982	339.257804071664	274.66070817485	179.143311471389	227.946327864409	227.427750576929
FBgn0036237	445.300468677881	-0.29999731486433	0.128155074724351	-2.3408929807079	0.0192376806280587	0.191445093919725	367.391676037043	402.083323344194	388.919562775588	316.4089657157	288.352104748477	338.368116712016
FBgn0029930	78.9939632320609	0.675355496728137	0.288528653921948	2.34068778801717	0.0192482557931457	0.191445093919725	124.841831663073	77.3237160277297	143.922211083621	240.796529055698	199.453036881358	109.553611558399
FBgn0266410	2155.29465565914	0.54892460580479	0.234564570684278	2.34018549435429	0.0192741643111002	0.191445093919725	2129.44495722442	1414.05745685711	1945.69645671064	2986.10961394192	2784.36439486375	2257.63645084902
FBgn0031414	916.427915338737	0.545501248445758	0.233134234829072	2.33985904663768	0.0192910189572896	0.191445093919725	1834.58044053449	1206.24997003258	1799.57695996162	2595.25147982252	2417.37080700206	2049.62326434573
FBgn0035756	169.214576624926	0.842232144515784	0.360071916672016	2.3390664628893	0.0193319940320978	0.191445093919725	319.832883022539	136.283049498874	275.759351007549	544.409543952013	487.805141629835	277.350915337718
FBgn0040931	307.418431780602	-0.453966792210731	0.194101075400922	-2.33881647112489	0.0193449338994873	0.191445093919725	342.423309704429	426.24698460286	303.225421825035	234.980187774159	270.116398519324	278.737669914406
FBgn0026403	523.094059982234	0.513774654078973	0.219685251354601	2.33868523676937	0.0193517297728562	0.191445093919725	770.452446834964	602.158438565945	880.01290899222	1197.00303574064	1169.36466194442	847.307046356728
FBgn0033192	354.022890330837	0.821817280332375	0.351462268768502	2.33828024616117	0.0193727150643872	0.191445093919725	630.154007442178	339.257804071664	593.267129657676	1122.55386733695	985.867868013568	651.774651043637
FBgn0013733	9150.90452614188	0.408490011337784	0.174753294188441	2.33752395475475	0.0194119568601905	0.191445093919725	14014.387331549	10457.0660463001	15275.5299458525	19681.3356284703	17293.1481634334	15778.4935735628
FBgn0250908	251.870768638286	0.971526478284613	0.415629128678075	2.33748409639765	0.0194140269214692	0.191445093919725	468.454111192864	189.443104267938	386.722277110189	857.32870489879	759.061271788481	429.893918773462
FBgn0030847	360.024112361716	0.261532223050641	0.111929924900266	2.33657105804079	0.0194614988114313	0.191696860333118	598.051822157387	479.407039371924	583.379344163382	679.348661683709	642.808644577633	665.642196810523
FBgn0000416	11149.8240559931	0.297163588908906	0.127210634482989	2.33599643706393	0.0194914272301232	0.191775450123408	13153.5731779864	12124.358673148	14721.813958172	17103.5331724924	17141.5638554035	14900.6779265189
FBgn0030802	383.688311324037	-0.391194836760191	0.167529828805752	-2.33507572680549	0.0195394651070287	0.191897751823155	303.187305467463	347.956722124784	285.647136501844	231.490383005236	262.13827704407	220.493977693486
FBgn0032956	970.617149436986	0.294932274108791	0.126313844139468	2.33491646238828	0.0195477851805664	0.191897751823155	674.145890980594	630.188285625997	720.709698250807	864.308314436636	839.982218180346	777.969317522298
FBgn0028507	214.746519726869	-0.309262330604084	0.132531549059206	-2.33349970478295	0.0196219338032624	0.192206785717151	223.526327168169	204.907847473484	219.72856653988	186.122921009235	162.981624423052	173.344322086074
FBgn0086667	2892.08957994722	-1.37096872668035	0.587522520461483	-2.33347434172139	0.0196232634611078	0.192206785717151	2756.03205519051	9802.71409941543	1644.668320551	1406.39132187603	1739.23048160544	2346.38874375709
FBgn0035325	20.6365312204401	-1.49544974760722	0.641025353960813	-2.33290265099037	0.0196532552185875	NA	7.1338189521756	23.1971148083189	18.6769281558898	1.16326825630772	4.55892655728818	12.4807911901973
FBgn0052683	107.735178791038	0.780811966333347	0.334731548884727	2.33265125123368	0.0196664566971489	0.192414145759228	222.337357342806	84.089541180156	172.486924733806	340.837599098162	278.094519994579	201.079413619845
FBgn0283521	4443.34144447445	0.486810531649742	0.208763603232413	2.33187454188451	0.0197072921179642	0.192597999143907	4699.99771965835	3091.98209465884	4133.09433661514	6235.11785380938	5835.42599332886	4637.30730444664
FBgn0032482	2553.45475737313	0.215123512562698	0.0922798674362788	2.33120742952134	0.019742424579665	0.192725769332439	3204.2736793522	3142.24251007687	3443.14663767992	3689.88690900809	4379.98868991461	3287.99510132864
FBgn0000108	1186.77922797388	0.870659153384634	0.373549774421686	2.33077146073118	0.0197654137544685	0.192734843719633	2385.07346967737	1014.87377286395	1852.31181593119	3926.03036503856	3631.18500288003	2044.07624603898
FBgn0033793	93.811390869238	-0.375180320921454	0.161062944591622	-2.32940184890281	0.0198377872194036	0.19322491297205	211.636628914543	224.238776480416	190.065210056996	140.755459013234	181.217330652205	160.863530895876
FBgn0036997	348.681757461038	0.38913173696629	0.16710631127571	2.32864775720085	0.0198777338555394	0.193398397211412	512.44599473128	572.1954986052	548.222773517001	764.267244394172	669.02247228204	705.858079534492
FBgn0001078	614.328326065356	0.685018030662149	0.294300675239441	2.32761284052381	0.019932670999662	0.193717181895491	763.318627882789	420.44770590078	651.495199790744	1096.96196569818	1042.85444997967	808.477918209447
FBgn0035374	272.672446374154	-0.347727643376261	0.149463968957145	-2.3264981239456	0.0199919924359126	0.19407296411263	217.581478041356	190.409650718284	169.190996235708	138.428922500619	149.304844751188	166.410549202631
FBgn0259227	602.706397685145	0.276781537147192	0.118989994783118	2.32609084193742	0.0200137050092114	0.19407296411263	783.531114913953	650.485761083276	822.883481691851	957.369774941254	903.807189982381	869.495119583745
FBgn0032805	54.660415090677	-0.784029980450644	0.337132612270108	-2.32558332215717	0.0200407901512855	0.194108199676648	40.4249740623284	71.52443732565	39.5511419771784	23.2653651261544	28.4932909830511	37.4423735705919
FBgn0003301	679.874265288071	0.648007596166137	0.278724324130833	2.32490507668058	0.0200770364662739	0.194108199676648	1284.08741139161	718.14401260754	1161.26547416327	1957.78047536589	1785.95947881764	1210.63674544914
FBgn0052698	439.327295095287	0.533508492129537	0.22954064796814	2.32424407987027	0.0201124160264357	0.194108199676648	649.177524647979	521.935083187175	694.342270266021	1123.71713559326	955.095113751873	618.49254120311
FBgn0033540	160.344047070468	0.340710988853918	0.146605204642662	2.32400336457612	0.0201253137135645	0.194108199676648	136.731529916699	124.684492094714	128.54121142583	157.041214601542	170.959745898307	165.023794625942
FBgn0036621	797.201297187508	0.383212272584728	0.164897281601717	2.32394536078719	0.0201284226744927	0.194108199676648	720.515714169735	560.59694120104	732.7947694105	971.328994016946	881.01255719594	771.035544638855
FBgn0052271	39.5142181836508	-0.613537998479175	0.26409728706273	-2.32315146173176	0.0201710172313616	0.194304495645431	91.5506765529202	117.918666942288	83.4968552851544	61.6532175843092	72.9428249166108	56.8569376442321
FBgn0022942	634.129977053806	0.224597780957082	0.0967425319892963	2.32160329421533	0.0202543063578502	0.19473799270964	430.407076781261	365.354558231023	401.004633935281	499.042081956012	443.355607696275	452.08199200048
FBgn0031194	499.024538581444	0.286220227630857	0.123306184077814	2.32121551543784	0.0202752152154616	0.19473799270964	519.579813683456	427.213531053207	496.586560380129	599.083151998476	596.079647365429	561.635603558878
FBgn0003285	96.3567892520491	0.713271292438707	0.307302349855398	2.32107334283106	0.0202828858150135	0.19473799270964	133.164620440611	82.1564482794628	117.554783098836	204.735213110159	188.055720488137	151.156248859056
FBgn0030505	731.614289086303	0.499558222008196	0.215303224453564	2.32025425200234	0.0203271273263705	0.194837695852339	1073.63975230243	729.742570011699	964.608407110074	1530.86102530096	1332.34628636747	1046.99970539988
FBgn0039907	969.62217895725	0.392940644751831	0.169384887278238	2.31980934701909	0.0203511932202564	0.194837695852339	927.396463782827	802.233553787696	923.958622300196	1277.26854542588	1225.2115122712	979.048731142144
FBgn0034800	43.3919596271672	-2.1414939690469	0.923199612426826	-2.31964348795331	0.0203601712616671	0.194837695852339	5.944849126813	3.86618580138648	6.5918569961964	1.16326825630772	0	2.77350915337718
FBgn0052666	964.148531555093	0.567147813228166	0.244622036152947	2.31846575291183	0.0204240221280023	0.19518522054661	1222.26098047275	830.263400847748	1285.4121142583	2006.63774213082	1791.65813701425	1144.07252576809
FBgn0030060	1038.82609928184	-0.299076940091259	0.129034270870398	-2.31781012961783	0.0204596423441277	0.19518522054661	1477.88949292571	1636.36314043683	1397.47368319364	1166.75806107664	1310.69138522035	1189.83542679881
FBgn0260741	176.928613761273	-0.343848384240427	0.148355089258959	-2.31773905403559	0.0204635071558538	0.19518522054661	117.708012710897	122.751399194021	110.962926102639	94.2247287609253	86.6196045884753	97.0728203682012
FBgn0051992	3416.61718412278	0.484981453143063	0.209319671694919	2.31694159089796	0.0205069137465647	0.195385938281064	3308.90302398411	2260.75214736075	3421.17378102593	4710.07316978996	4368.59137352139	3501.55530613869
FBgn0015075	257.08631224133	0.285352690747105	0.123194973202361	2.31626894612317	0.0205435887754429	0.195522151558872	167.644745376127	159.480164307192	174.684210399205	209.38828613539	191.474915406103	210.786695656665
FBgn0263392	838.847934271119	0.681239913123576	0.294306471880947	2.31472963801881	0.020627732715439	0.19588713348763	1649.10114777793	818.664843443588	1251.35418644462	2327.69978087175	2208.79991700612	1424.19695025918
FBgn0264991	66.1372719748343	4.15555688271572	1.79539333623624	2.31456628408078	0.0206366798230318	0.19588713348763	0	0	1.0986428326994	0	20.5151695077968	0
FBgn0243512	485.854554377322	0.370923099497702	0.160271804910912	2.3143378194554	0.0206491988030339	0.19588713348763	570.705516174048	412.715334298007	548.222773517001	816.61431592802	655.345692610175	503.391911337958
FBgn0033902	2641.52358185921	-0.319881304522421	0.138280817447346	-2.31327316707701	0.0207076250102125	0.196228329408055	2286.38897417228	2947.9666735572	2373.0685186307	2014.78061992497	1952.36029815866	2130.05502979367
FBgn0032202	268.342424936844	-0.436819650013054	0.188874331479739	-2.31275285842593	0.0207362310046938	0.196286511687984	360.257857084868	466.841935517418	413.089705094975	264.061894181852	302.028884420342	352.235662478902
FBgn0000273	1126.51885794934	0.514036566601123	0.222361924261864	2.31171127119663	0.0207935998444071	0.196588545886256	1727.57315625186	1165.65501911803	1591.93346458143	2314.90383005236	2255.52891421833	1831.90279580563
FBgn0039642	101.049823513046	-0.493108097772154	0.213341375929312	-2.31135707091127	0.0208131400875342	0.196588545886256	59.44849126813	87.9557269815425	73.6090697908598	55.8368763027706	41.0303390155936	62.4039559509865
FBgn0032515	657.41139337015	-0.230094806613973	0.0995933478752249	-2.31034312554938	0.0208691651449208	0.196904855152454	1065.31696352489	1264.24275705338	982.186692433264	900.369630382176	957.374577030517	969.341449105323
FBgn0034911	200.852495157307	0.816220962993163	0.353547056525631	2.30866287224764	0.0209622961298264	0.197122181287814	401.871800972559	185.576918466551	319.705064315526	650.266955276016	574.42474621831	370.263471975853
FBgn0029881	862.354535342518	0.442287248789345	0.191601201919073	2.30837408304023	0.0209783391988127	0.197122181287814	1344.7248724851	1061.26800248059	1398.57232602634	1860.06594183604	1839.52686586578	1467.18634213653
FBgn0002643	544.031138710033	0.526330139334277	0.228015573503791	2.30830785479451	0.0209820198757225	0.197122181287814	772.83038648569	576.061684406586	837.165838516943	1210.96225481634	1085.02452063459	850.080555510105
FBgn0035480	66.1839020041864	-0.453333247855807	0.196392674299832	-2.30830019231626	0.0209824457591469	0.197122181287814	126.030801488436	138.216142399567	131.837139923928	90.7349239920022	109.414237374916	88.7522929080697
FBgn0039969	433.063575880628	-0.361980467838741	0.157021242556237	-2.30529616213614	0.0211499923415424	0.19848279601295	495.800417176204	656.285039785356	502.079774543626	358.286622942778	418.28151163119	514.485947951466
FBgn0287612	21.8649241784195	0.658932223741693	0.285935264206892	2.30448044094664	0.0211956890533069	NA	22.5904266818894	32.8625793117851	35.1565706463808	44.2041937396934	52.427655408814	47.149655607412
FBgn0022710	397.779433998237	0.344982396137803	0.149708481698698	2.30436106373793	0.0212023837752676	0.198742997915144	609.941520411013	553.831116048614	584.477986996081	731.695733217556	748.803687034583	739.140189375018
FBgn0031571	574.795699106522	0.283055846899224	0.122855154972136	2.3039802193357	0.0212237539960213	0.198742997915144	443.48574486025	538.366372843068	510.868917205221	611.879102817861	584.682330972209	622.652804933176
FBgn0264502	259.991395548885	0.838082253844938	0.363816538067924	2.30358481858917	0.021245960862166	0.198742997915144	538.603330889257	234.870787434229	391.116848440987	831.73680326002	743.105028837973	504.778665914646
FBgn0030694	147.371089892925	-0.419670012715549	0.182364326718965	-2.30127251456524	0.0213762323241833	0.19974774525817	110.574193758722	159.480164307192	116.456140266136	96.5512652735408	96.8771893423737	97.0728203682012
FBgn0037548	213.541239586216	0.305067695114857	0.132733182212414	2.2983529064093	0.0215417115415587	0.201054648277008	297.24245634065	312.194503461959	287.844422167243	383.878524581548	384.089562451529	339.754871288704
FBgn0039419	359.5494979306	0.299844443787102	0.130480936734059	2.29799426101785	0.0215621157646282	0.201054648277008	530.280542111719	522.901629637522	558.110559011295	703.777295066171	697.515763265091	579.66341305583
FBgn0266886	52.7245437848267	0.887153752547938	0.386191059571883	2.29718873743842	0.0216080053360727	0.201267742666596	118.89698253626	44.4611367159446	76.904998288958	177.980043215081	157.282966226442	106.780102405021
FBgn0016694	1399.56016368479	0.662404291152753	0.288660274149037	2.29475390441412	0.0217472316837399	0.20196147477962	2639.51301230497	1276.80786090789	1885.27110091217	3789.92797905055	3339.41370321359	2049.62326434573
FBgn0004514	103.316392328513	0.769640948809998	0.335393846446787	2.29473783423188	0.0217481531813136	0.20196147477962	203.313840137004	94.7215521339689	151.612710912517	304.776283152623	280.373983273223	178.891340392828
FBgn0035625	524.340698192601	0.446001496098415	0.194363798151925	2.29467370127124	0.0217518310366971	0.20196147477962	934.530282735003	607.957717268025	895.393908650011	1290.06449624526	1107.81915342103	919.418284344534
FBgn0267322	23.0708551926831	0.912327688777976	0.397645278080693	2.29432546811945	0.0217718107361091	NA	49.9367326652292	16.4312896558926	32.959284980982	67.4695588658478	82.0606780311872	34.6688644172147
FBgn0028397	766.220010737605	0.73310450510095	0.319640996779847	2.2935246494863	0.0218178179022233	0.202359102984846	1361.37045004018	647.586121732236	1101.9387611975	1892.63745301266	1775.70189406374	1500.46845197705
FBgn0051249	183.660230110456	-0.408719957951287	0.178271979563915	-2.29267638667103	0.021866642990924	0.202469789174794	83.2278877753819	91.821912782929	87.891426615952	69.7960953784632	70.6633616379667	56.8569376442321
FBgn0039994	1247.37388359265	0.418419203345272	0.182544630515267	2.29214741712316	0.0218971380111106	0.202469789174794	1029.64786876401	774.203706727644	988.77854942946	1199.32957225326	1331.20655472815	1199.54270883563
FBgn0040299	215.841877514249	0.430559965953887	0.187875332233823	2.29173229308267	0.0219210957619295	0.202469789174794	103.440374806546	103.420470187088	132.935782756627	189.612725778158	137.907528357967	128.968175632039
FBgn0011787	250.333512751951	-0.394017731036985	0.171931842164864	-2.29170888926535	0.0219224471282311	0.202469789174794	143.865348868875	131.450317247141	113.160211768038	93.0614605046176	90.0387995064415	113.713875288464
FBgn0265457	15.492944418123	0.943745480655086	0.411847988422787	2.29148983893124	0.0219350988886951	NA	19.0235172058016	17.3978361062392	14.2823568250922	34.8980476892316	31.9124859010172	30.5086006871489
FBgn0003475	819.019328637408	0.394100113885803	0.172056170206602	2.29053171073478	0.0219905124975317	0.202883957434989	1140.22206252273	879.557269815425	1073.37404754731	1459.90166166619	1359.6998457112	1242.53210071298
FBgn0038826	2110.37394544709	0.561035912227224	0.245058181790932	2.28939882001517	0.0220561906424248	0.203124515238032	3694.1292474016	2582.61211532617	3055.32571773703	5244.0132994352	4850.69785695462	3670.73936449469
FBgn0030617	34.3767527529156	0.549714656142147	0.240118282907116	2.28934943847983	0.022059057361716	NA	61.8264309188552	60.8924263718371	50.5375703041724	86.0818509667713	94.5977260637297	72.1112379878066
FBgn0035046	552.432620874152	-0.33184679880941	0.144956836377283	-2.28928008573327	0.0220630840060538	0.203124515238032	520.768783508819	638.887203679117	519.658059866816	423.42964529601	461.591313925428	450.695237423791
FBgn0038290	33.813186686583	-0.859046083595431	0.375332365115207	-2.28876101140851	0.0220932419460891	NA	48.7477628398666	54.1266012194108	62.6226414638658	30.2449746640007	22.7946327864409	38.8291281472805
FBgn0026418	2562.38155965758	0.270441397028684	0.118218696145854	2.28763643861394	0.0221587020379478	0.203790083900578	1621.75484179459	1354.13157693562	1593.03210741413	2127.61764078682	1731.25236013018	1647.46443710604
FBgn0265177	234.381733912393	-0.417698913396226	0.182648835785894	-2.28689611734434	0.0222018873082071	0.203790817943488	235.416025421795	282.231563501213	213.136709543684	173.32697018985	157.282966226442	219.107223116797
FBgn0034728	443.78148746182	0.30181093256045	0.131977549194361	2.28683540801306	0.022205431919675	0.203790817943488	210.44765908918	265.800273845321	282.351208003746	309.429356177854	324.823517206783	302.312497718112
FBgn0000003	9337.82523027468	-1.25497062941724	0.548999378861408	-2.28592358705391	0.0222587292821013	0.204065600983966	11383.1971080215	28129.4013444377	11940.0503057771	3451.41691646501	13121.7303635147	4985.38270319548
FBgn0031752	704.001129245742	0.245704841457522	0.107516469397445	2.28527631938183	0.0222966305691129	0.204198806375617	831.089907928457	722.010198408926	867.927837832526	963.186116222792	1008.66250080001	894.45670196414
FBgn0004611	1080.50904839564	0.408285185889414	0.178984524341255	2.28112004315508	0.0225413444088608	0.206223796963578	1533.77107471775	1218.81507388709	1666.64117720499	2090.39305658497	1956.91922471595	1815.26174088536
FBgn0022023	1884.12219578546	-0.292446238428183	0.128227590399983	-2.28068107273909	0.022567325968058	0.206245530316865	1689.52612184025	2014.28280252236	1565.56603659665	1414.53419967019	1420.10562259527	1469.9598512899
FBgn0031374	1888.93404163504	0.414608985306282	0.181853950240212	2.27990090266735	0.0226135665216377	0.206452174189706	2772.67763274558	2006.55043091959	2678.49122612114	3786.43817428163	3363.34806763935	2787.37669914406
FBgn0010329	73.4850792346348	0.759868132767457	0.333842498926182	2.2761276206942	0.0228383723615755	0.208286909523053	134.353590265974	71.52443732565	137.330354087425	233.816919517852	198.313305242036	146.99598512899
FBgn0267975	732.039173709381	0.327534358141976	0.144017419256719	2.27426904212281	0.0229498153104296	0.20871441908444	793.042873516854	703.64581585234	788.825553878169	1113.24772128649	1031.45713358645	718.338870724689
FBgn0030349	718.554549606967	0.227582033862985	0.100070533379639	2.27421625704345	0.0229529872631431	0.20871441908444	1116.44266601548	979.111554201127	1168.95597399216	1257.49298506865	1266.24185128679	1296.61552920383
FBgn0027948	1853.597964591	0.451027462423634	0.198327849783246	2.27415092190313	0.0229569138995246	0.20871441908444	1546.84974279674	1155.98955461456	1591.93346458143	2114.82168996744	2049.23748750104	1704.32137475028
FBgn0022224	140.821978858892	-0.493666358243048	0.217194182813666	-2.27292624437631	0.0230306249633949	0.208862145987297	91.5506765529202	168.179082360312	110.962926102639	83.7553144541559	71.8030932772888	110.940366135087
FBgn0037153	340.093301742048	0.817596072831813	0.359781247662861	2.27248106493297	0.0230574703819461	0.208862145987297	601.618731633475	302.529038958492	577.886129999885	1067.88025929049	947.116992276618	594.917713399405
FBgn0035243	55.8322046013638	-0.576497851353115	0.253736000962509	-2.27203805989792	0.0230842116517524	0.208862145987297	43.9918835384162	51.2269618683709	40.6497848098778	31.4082429203084	30.7727542616952	29.1218461104604
FBgn0031187	584.726910556035	0.431824869479315	0.190090227206249	2.27168369371658	0.0231056217680903	0.208862145987297	879.837670768324	542.232558644455	716.315126920009	1012.04338298772	1026.89820702916	841.760028049973
FBgn0040512	428.743736327312	-0.346569014431829	0.152579568214356	-2.27139857903478	0.023122860359997	0.208862145987297	388.79313289357	420.44770590078	381.229062946692	260.572089412929	345.338686714579	331.434343828573
FBgn0003447	723.48378139407	0.387517501049768	0.170625337714483	2.27116034605729	0.0231372729560561	0.208862145987297	693.169408186395	541.266012194108	506.474345874424	894.553289100637	792.11348932882	586.597185939273
FBgn0265935	947.067929686924	-0.21509717635617	0.0947326108264983	-2.27057160654126	0.0231729239277949	0.208862145987297	802.554632119755	808.999378940122	882.210194657619	687.491539477863	688.397910150515	775.195808368921
FBgn0039064	732.303549156459	0.861122473248476	0.379268239565011	2.27048400951293	0.0231782324179739	0.208862145987297	1338.78002335829	645.653028831543	1222.78947279443	2291.63846492621	2220.19723339934	1311.8698295474
FBgn0039404	92.3290051229242	-0.51607954487658	0.227364953478518	-2.26982891154041	0.0232179656670264	0.208862145987297	57.0705516174048	57.9927870207973	61.5239986311664	27.9184381513853	49.0084604908479	47.149655607412
FBgn0263219	447.459415206755	0.53087796561774	0.233888068314047	2.26979498973379	0.0232200247146816	0.208862145987297	890.538399196587	512.269618683709	676.763984942831	1112.08445303018	1112.37807997831	776.58256294561
FBgn0011230	6048.21366136126	0.416872333695516	0.183692094333178	2.26940813761641	0.0232435177859656	0.208862145987297	6728.38024172695	5662.99565258085	8310.13438653826	10446.1489416433	8674.49750688008	8514.67310086793
FBgn0035831	131.933324462727	-0.454906056322219	0.200497192228493	-2.26888990945964	0.0232750215064867	0.208862145987297	66.5823102203056	98.5877379353554	78.0036411216574	45.3674619960011	64.9647034413565	69.3377288344294
FBgn0032929	455.981042358973	-1.5584972446988	0.686942928465759	-2.26874341392464	0.0232839338665019	0.208862145987297	7.1338189521756	5.79927870207973	8.7891426615952	3.48980476892316	2.27946327864409	1.38675457668859
FBgn0039396	25.6638818050356	0.801091522991788	0.353177956258644	2.26823760881928	0.0233147283485388	NA	41.613943887691	34.7956722124784	23.0714994866874	57.0001445590783	68.3838983593226	47.149655607412
FBgn0036262	9546.20172459413	0.385191403429202	0.169859583918919	2.26770485681321	0.0233472016408482	0.209214872549836	13874.0888921562	14380.278088257	12399.2830098454	18262.1483557749	20314.5767392761	14516.5469087761
FBgn0050089	158.530380440505	0.598387626995372	0.263970654737152	2.2668717763011	0.0233980598171729	0.209279912806529	299.620395991375	176.878000413432	219.72856653988	367.59276899324	402.325268680682	281.511179067783
FBgn0030913	110.847339777094	0.994493371730105	0.438721015964834	2.26680130547888	0.0234023663513768	0.209279912806529	199.746930660917	76.3571695773831	161.500496406812	338.511062585547	317.98512737085	213.560204810043
FBgn0040324	1099.2373286317	0.463841397915371	0.204711815043861	2.26582621924382	0.0234620253914966	0.209598891457573	1331.64620440611	895.022013020971	1239.26911528492	1634.39190011235	1626.39704931256	1517.10950689732
FBgn0002622	10362.2132063237	-0.334736810749042	0.147787695959386	-2.26498429775258	0.023513643112605	0.209733651643067	9914.81937369872	11246.7344962333	8312.33167220366	7385.59015929772	8250.51733705228	7735.31702876895
FBgn0005677	120.34868985927	0.586559184116921	0.258989703641877	2.26479730996563	0.0235251205917598	0.209733651643067	250.872633151508	138.216142399567	221.925852205279	324.551843509854	328.242712124749	262.096614994143
FBgn0261109	172.193144936175	-0.378144019731603	0.167173338466639	-2.26198760639733	0.0236981690323498	0.211061063033273	84.4168576007445	116.952120491941	104.371069106443	77.9389731726173	79.7812147525431	79.0450108712495
FBgn0285948	11920.9954203389	-0.369592891464587	0.163506929714593	-2.26041117712701	0.0237957434496822	0.211714267331846	10216.8177093408	13019.380686169	9460.41343237454	8007.93867642235	8697.29213966652	8603.425393776
FBgn0037901	290.469711860255	-0.339362966585358	0.150170595428956	-2.25984964377335	0.023830584111183	0.211808558880372	183.10135310584	270.633006097054	230.714994866874	171.000433677235	168.680282619663	205.239677349911
FBgn0010225	5388.81946032484	0.333826700285185	0.14779651548353	2.25869127694275	0.0239025954620639	0.212131820917118	9052.81625031083	7960.47656505477	9145.10293938981	11697.8255854304	11912.475094194	9355.04637434122
FBgn0051706	461.869891979337	-0.330388793099555	0.146287874111786	-2.25848379508946	0.0239155137465218	0.212131820917118	947.608950813992	1109.59532499792	873.421051996023	668.879247376939	769.31885654238	895.843456540828
FBgn0033092	132.329690024238	0.368516736807072	0.163312822582559	2.25650828256781	0.0240388171828075	0.212958814533787	137.920499742062	93.7550056836223	138.428996920124	174.490238446158	152.724039669154	146.99598512899
FBgn0265726	194.187302797604	0.397492090957137	0.176176921073914	2.2562097721663	0.024057496846154	0.212958814533787	334.10052092689	262.900634494281	312.01456448663	408.30715796401	450.193997532207	335.594607558638
FBgn0001253	23.6259865570394	0.730418094216074	0.323985444825066	2.2544781127759	0.0241661060790667	NA	53.503642141317	31.8960328614385	34.0579278136814	67.4695588658478	77.501751473899	51.3099193374778
FBgn0037012	263.930068854797	0.273394089507819	0.121277104020043	2.2542926937193	0.0241777606716357	0.213806776303726	306.754214943551	282.231563501213	305.422707490433	355.960086430162	364.714124583054	359.169435362344
FBgn0005558	155.876661388813	0.450195331906387	0.19982795030019	2.2529147260435	0.0242645261756448	0.214229103682516	290.108637388474	210.707126175563	274.66070817485	414.123499245548	379.530635894241	262.096614994143
FBgn0264507	37.5665220366937	0.62623588090834	0.277986594760131	2.25275568215333	0.0242745579312911	0.214229103682516	52.3146723159544	49.2938689676777	45.0443561406754	87.245119223079	70.6633616379667	67.9509742577408
FBgn0028408	458.77091641118	0.872076200932679	0.38720946215525	2.25220787756221	0.0243091384420954	0.21430182619883	167.644745376127	86.0226340808493	145.020853916321	282.674186282776	281.513714912545	163.637040049253
FBgn0042135	1596.18240256674	0.251354207682412	0.111621283443339	2.25184839242602	0.0243318543652557	0.21430182619883	2037.8942806715	1572.57107471395	1896.25752923917	2403.31221753175	2133.57762881087	2012.18089077514
FBgn0259222	182.451617191399	0.552613949320115	0.245557814473677	2.25044334469491	0.0244208161306121	0.214868751795728	376.903434639944	225.205322930763	285.647136501844	538.593202670475	439.936412778309	320.340307215064
FBgn0027790	156.592000368402	0.3105207565924	0.13802408352364	2.24975778621429	0.0244643250628518	0.215035018183236	244.927784024695	237.770426785269	277.956636672948	355.960086430162	281.513714912545	305.086006871489
FBgn0022981	681.366130225822	-2.88182333718365	1.28207239041086	-2.24778519429791	0.0245898904138311	0.215921479945369	0	0	9.8877854942946	1.16326825630772	0	0
FBgn0051163	678.22522096923	0.830690310956228	0.369670065160646	2.24711273441964	0.0246328232845217	0.21608130224585	764.507597708151	343.123989873051	565.801058840191	1291.22776450157	994.985721128144	687.83027003754
FBgn0265623	287.487543365861	0.47290858254064	0.210533524781112	2.24623884976189	0.0246887130409479	0.216122460182784	438.729865558799	352.789454376517	437.259847414361	632.8179314314	609.756427037294	460.402519460611
FBgn0050015	1100.12249621979	0.297986950102495	0.132677654696029	2.24594677065401	0.0247074175924235	0.216122460182784	1683.58127271344	1371.52941304186	1834.733530608	2075.27056925297	1966.03707783053	1967.80474432111
FBgn0033993	78.7098463403154	0.717782455331563	0.31965605821015	2.2454836593764	0.0247371000920991	0.216122460182784	11.889698253626	14.4981967551993	18.6769281558898	24.4286333824621	27.3535593437291	22.1880732270174
FBgn0033476	1790.16360102825	0.260557174699542	0.116053972785172	2.24513791683684	0.024759280132261	0.216122460182784	1794.15546647216	1544.5412276539	1996.23402701481	2220.67910129144	2043.53882930442	2124.50801148692
FBgn0033224	1090.70345037774	0.249409107227088	0.111107107078972	2.24476285796746	0.0247833603472562	0.216122460182784	1193.72570466405	984.910832903207	1099.7414755321	1377.30961546834	1371.09716210442	1142.6857711914
FBgn0053170	142.745869466565	-0.426140516370109	0.189852547180245	-2.24458677378468	0.0247946726212453	0.216122460182784	155.755047122501	206.840940374177	161.500496406812	96.5512652735408	136.767796718645	159.476776319188
FBgn0038425	75.3595350139669	-0.541538747282783	0.24129109679185	-2.24433787438889	0.0248106704318796	0.216122460182784	47.558793014504	48.3273225173311	40.6497848098778	33.7347794329239	30.7727542616952	29.1218461104604
FBgn0267912	582.512267611561	0.618110815716422	0.275523315079744	2.24340657173613	0.0248706084995974	0.216423113422237	806.121541595842	447.511006510486	684.454484771726	1115.5742577991	1096.42183702781	759.941508025347
FBgn0033244	749.251191257926	0.285073132908122	0.127092741135084	2.24303237432832	0.0248947269073307	0.216423113422237	853.680334610346	739.408034515165	919.564050969398	1127.20694036218	1030.31740194713	900.003720270894
FBgn0034645	517.851169385666	-0.479527831142936	0.213895481361796	-2.241879202356	0.0249691805399327	0.216854602760827	619.453279013914	723.943291309619	583.379344163382	392.021402375702	454.752924089496	536.674021178484
FBgn0041182	3280.24484829838	0.502888652587616	0.224381484077604	2.24122170621569	0.0250117175020175	0.217008317591983	4864.07555555839	4150.35045778839	5582.20423294565	7791.57078074911	7432.19002001905	5458.26601384629
FBgn0036145	341.947077651633	-0.370328471410261	0.16535196172	-2.23963760428412	0.025114459345556	0.217569153260036	656.311343600155	834.129586649134	626.226414638658	457.164424728934	569.865819661022	612.945522896356
FBgn0003209	803.885114374948	0.321878003804625	0.143731768425735	2.23943535468942	0.0251276031353057	0.217569153260036	1219.88304082203	790.634996383536	1096.445547034	1380.79942023726	1284.47755751594	1213.41025460252
FBgn0027492	1002.04203777638	0.396585832830113	0.177120421143129	2.23907458140943	0.0251510638425817	0.217569153260036	1168.75733833143	798.367367986309	1039.31611973363	1497.12624586804	1400.73018472679	1055.32023286002
FBgn0038532	363.86865441057	0.386044354267838	0.172462513896312	2.23842471935632	0.0251933715312098	0.217675380284664	281.785848610936	241.636612586655	296.633564828838	400.164280169856	362.43466130441	306.472761448178
FBgn0024326	643.985498611964	0.325328309997575	0.145371845853656	2.23790451367783	0.0252272826360168	0.217675380284664	558.815817920422	423.34734525182	537.236345190007	731.695733217556	657.625155888819	508.938929644712
FBgn0039054	1011.90239130078	0.5973139955856	0.266927474479142	2.23773890923422	0.0252380863257829	0.217675380284664	1968.93403080046	1155.02300816421	1842.42403043689	3011.70151558069	2653.29525634172	1845.77034157251
FBgn0005593	12311.6847822542	-0.322942792644839	0.144377655212065	-2.23679205878841	0.025299933816685	0.217993611199582	10909.9871175272	13407.9323592083	9573.57364414257	8894.34908772883	9574.88550194449	8625.61346700302
FBgn0003386	182.074243191227	0.643890753201128	0.287956297947264	2.23607109061754	0.0253471147865449	0.218184967379353	340.045370053703	202.008208122444	298.830850494237	488.572667649242	483.246215072547	339.754871288704
FBgn0286071	345.514401301808	0.356261222485161	0.15936667197381	2.23548134671287	0.025385764889473	0.218302586456029	425.651197479811	405.949509145581	509.770274372522	587.450469435399	555.049308349835	574.116394749076
FBgn0085421	515.043999974701	0.544449823371894	0.243733146158226	2.23379475444201	0.0254965808571575	0.219039947835777	966.632468019793	565.429673452773	847.053624011238	1347.06464080434	1179.62224669832	940.219602994863
FBgn0261244	432.586748239412	0.400930397123656	0.179599485852915	2.23235826772913	0.0255912936677596	0.219398739508185	523.146723159544	401.116776893848	499.882488878227	708.430368091402	599.498842283395	569.95613101901
FBgn0043001	195.600982583089	-0.576746011305224	0.258386711618204	-2.23210399518313	0.0256080904519936	0.219398739508185	42.8029137130536	61.8589728221838	34.0579278136814	36.0613159455393	28.4932909830511	29.1218461104604
FBgn0052594	315.868157546038	0.28072814740432	0.125778054012442	2.2319326659049	0.025619413531159	0.219398739508185	312.699064070364	292.863574455026	353.762992129207	460.654229497857	366.993587861698	334.20785298195
FBgn0033437	148.617664487211	-0.417597525965617	0.187125878827372	-2.23163962452709	0.0256387905502869	0.219398739508185	159.321956598588	259.034448692895	208.742138212886	161.694287626773	143.606186554578	166.410549202631
FBgn0262467	264.853691687975	-0.367609637995991	0.164792590266516	-2.2307413057921	0.02569826984591	0.219497961416668	168.833715201489	249.368984189428	190.065210056996	146.571800294773	139.047259997289	189.985377006337
FBgn0030993	318.288072152113	-0.613288725043696	0.274930364241128	-2.23070567973281	0.0257006311696523	0.219497961416668	212.825598739905	418.514613000087	263.674279847856	167.510628908312	147.025381472544	273.190651607652
FBgn0044511	186.661530509483	-0.468552240051862	0.210134100225869	-2.22977726865	0.0257622332033982	0.219688004618899	123.65286183771	173.011814612045	126.343925760431	90.7349239920022	90.0387995064415	127.58142105535
FBgn0032197	664.674690390463	0.364945304388892	0.163708613605076	2.22923703495083	0.0257981375889356	0.219688004618899	250.872633151508	264.833727394974	275.759351007549	339.674330841854	352.177076550512	327.274080098507
FBgn0052767	525.36390713083	0.695156526547003	0.31183645139137	2.22923434205756	0.0257983166692218	0.219688004618899	588.540063554487	332.491978919238	489.994703383933	892.226752588021	724.86932260882	665.642196810523
FBgn0265140	654.611864159398	0.385009826626363	0.172831268021566	2.22766303246888	0.0259029939355783	0.220364613451945	856.058274261071	676.582515242635	897.59119431541	1087.65581964772	1023.4790121112	1060.86725116677
FBgn0034070	378.981535806484	0.674174038500226	0.302833507291289	2.22622009212393	0.0259994427885506	0.220489316737398	737.161291724812	419.481159450434	695.44091309872	1192.34996271541	1032.59686522577	728.046152761509
FBgn0002524	679.398217816931	0.19932073275885	0.0895539622230837	2.22570534916514	0.0260339242331307	0.220489316737398	431.596046606624	399.183683993155	446.048990075957	493.225740674473	509.460042776954	459.015764883923
FBgn0082585	119.635171720768	0.341084394683298	0.153267484075309	2.22541915358709	0.0260531129109831	0.220489316737398	192.613111708741	173.011814612045	209.840781045585	255.919016387698	226.806596225087	245.45556007388
FBgn0003175	963.156700580384	0.403789226123085	0.181494348877335	2.22480329895004	0.026094445847729	0.220489316737398	1529.0151954163	1118.29424305104	1505.14068079818	2056.65827715205	1789.37867373561	1644.69092795267
FBgn0263832	291.74715751432	-0.341970772132602	0.153709835281764	-2.2247813323444	0.0260959211775882	0.220489316737398	233.038085771069	247.435891288735	231.813637699573	180.306579727697	196.033841963392	185.825113276271
FBgn0259213	293.189344710729	0.784617125521543	0.352711789482679	2.22452764244806	0.0261129648242484	0.220489316737398	576.650365300861	248.402437739082	506.474345874424	907.349239920022	844.541144737635	539.447530331861
FBgn0051211	295.374091035864	0.470846196113112	0.211662356224337	2.2245155185463	0.0261137795851128	0.220489316737398	449.430593987063	273.532645448094	393.314134106385	513.001301031705	580.12340441492	450.695237423791
FBgn0031070	86.2212103131191	-1.90240003350551	0.855230430673081	-2.22442977386608	0.026119542500081	0.220489316737398	2.3779396507252	5.79927870207973	9.8877854942946	3.48980476892316	0	1.38675457668859
FBgn0036184	160.74517496631	-0.402397131885654	0.180932356964895	-2.22401973110718	0.0261471167467237	0.220509033799349	84.4168576007445	91.821912782929	75.8063554562586	68.6328271221555	67.2441667200006	54.083428490855
FBgn0052406	117.264100673172	0.71619423447703	0.322233465652923	2.22259420828885	0.026243175109847	0.220572348543182	255.628512452959	111.152841789861	174.684210399205	375.735646787394	290.631568027121	220.493977693486
FBgn0261403	2269.17981260905	0.281897792780825	0.126849914347126	2.22229391507044	0.0262634491093111	0.220572348543182	2436.19917216797	2084.84069339766	2444.48030275617	2841.86435015976	2980.39823682714	2643.15422316845
FBgn0053988	249.659144074513	0.923822281045492	0.415786325221551	2.22186788022246	0.0262922356535776	0.220572348543182	489.855568049391	204.907847473484	381.229062946692	794.512219058173	821.746511951194	422.96014589002
FBgn0038321	452.450208253689	-0.341051617742691	0.153514955816989	-2.22161818649951	0.0263091197588513	0.220572348543182	694.358378011758	851.527422755373	688.849056102524	529.287056620013	600.638573922717	636.520350700062
FBgn0260935	347.231119770087	0.225603690506726	0.101556790316365	2.22145353160469	0.0263202587269763	0.220572348543182	373.336525163856	347.956722124784	416.385633593073	438.552132628011	429.678828024411	461.7892740373
FBgn0261085	89.3832486415405	0.720976506383769	0.324597780189022	2.22113812966905	0.0263416071717282	0.220572348543182	185.479292756565	89.8888198822358	159.303210741413	244.286333824621	268.976666880002	201.079413619845
FBgn0262730	393.767826709175	0.637983658721263	0.287239210742081	2.22108832938594	0.0263449793446737	0.220572348543182	586.162123903761	298.662853157106	444.950347243257	764.267244394172	800.091610804075	502.005156761269
FBgn0037487	22.1737114103219	0.597062685163098	0.268815951144103	2.22108354292946	0.0263453034741066	NA	35.669094760878	31.8960328614385	43.945713307976	57.0001445590783	56.9865819661022	54.083428490855
FBgn0283657	1072.72494553786	0.7132118213634	0.32116363034148	2.22071166839493	0.0263704966234783	0.220572348543182	1115.25369619012	678.515608143328	1072.27540471461	1799.57599250804	1681.10416800001	1216.18376375589
FBgn0003862	1908.30269902718	0.419193915693865	0.188779795985613	2.22054438349861	0.0263818363543122	0.220572348543182	2281.63309487083	1836.43825565858	2470.84773074095	3537.49876743178	2967.8611887946	2302.01259730306
FBgn0038533	332.126038202731	-0.378433044845313	0.17045568251242	-2.22012571987877	0.0264102347480788	0.22059868163859	335.289490752253	428.180077503553	399.905991102582	289.653795820622	266.697203601358	341.141625865393
FBgn0052251	221.103800974301	1.08913089671027	0.490805762947232	2.21906705041555	0.0264821632753733	0.220685568191413	4.7558793014504	4.83273225173311	7.6904998288958	11.6326825630772	11.3973163932204	13.8675457668859
FBgn0013675	22112.3212897048	-0.525197106926415	0.236683772936307	-2.2189823172531	0.0264879275563749	0.220685568191413	26151.3913088504	46723.821956206	32384.6947794802	23260.7120531292	22908.6059503731	26973.7632711697
FBgn0015903	397.771338714348	0.462789393347998	0.208572284851557	2.21884414641844	0.0264973294539364	0.220685568191413	147.432258344962	102.453923736742	129.639854258529	193.102530547082	188.055720488137	138.675457668859
FBgn0037205	130.30223113392	-2.99409995062175	1.34981216556293	-2.21816044262209	0.0265438948311115	0.220685568191413	1.1889698253626	0.966546450346621	3.2959284980982	0	0	0
FBgn0034430	200.398845382445	-0.388716120866303	0.175246081492936	-2.21811590624337	0.0265469305447151	0.220685568191413	95.1175860290079	132.416863697487	114.258854600738	69.7960953784632	87.7593362277974	106.780102405021
FBgn0037186	230.149965339479	0.319731505501053	0.144193145013408	2.21738353422641	0.026596893929301	0.220890743593444	280.596878785573	269.666459646707	275.759351007549	297.796673614776	363.574392943732	370.263471975853
FBgn0028743	99.3095171349144	0.638115152439173	0.287836207347067	2.21693843981812	0.0266272985219695	0.220903841346214	177.156503979027	70.5578908753034	117.554783098836	205.898481366466	210.850353274578	148.382739705679
FBgn0035699	49.926813903352	0.659352763731195	0.297458575545116	2.21662045722797	0.0266490384318312	0.220903841346214	83.2278877753819	50.2604154180243	78.0036411216574	146.571800294773	90.0387995064415	95.6860657915126
FBgn0051108	299.80067512783	0.318935515552417	0.144068357700245	2.21377907434753	0.0268439802416578	0.222233423916915	146.2432885196	167.212535909965	193.361138555094	230.327114748929	217.68874311051	183.051604122894
FBgn0016797	955.716549741381	0.542482087136798	0.245094976556265	2.21335457282318	0.0268732099392152	0.222233423916915	1684.7702425388	1041.93707347366	1622.69546389701	2440.5368017336	2245.27132946443	1646.07768252935
FBgn0086670	607.461571970702	-1.15150745280914	0.520493076063112	-2.21233961750053	0.0269432076511409	0.222233423916915	520.768783508819	1823.87315180407	357.058920627305	316.4089657157	420.560974909834	479.817083534252
FBgn0013812	213.766422711305	0.794364939378327	0.359105765175976	2.21206401125044	0.0269622423475936	0.222233423916915	379.281374290669	212.640219076257	398.807348269882	775.899926957249	594.939915726107	345.301889595459
FBgn0034646	290.256861691578	-0.342173355937912	0.154689345885149	-2.21200337993518	0.026966431396119	0.222233423916915	140.298439392787	174.944907512738	152.711353745217	122.143166912311	104.855310817628	145.609230552302
FBgn0261397	1526.27670065892	0.410092125101061	0.185410742945626	2.21180347258155	0.0269802470777579	0.222233423916915	1397.03954480105	1213.01579518501	1639.17510638751	2171.82183452651	1666.28765668883	1806.94121342523
FBgn0037238	444.549456515039	0.430024354498085	0.194447656272852	2.21151729334639	0.0270000356803787	0.222233423916915	922.640584481377	605.058077916985	842.65905268044	1155.12537851357	1170.50439358374	863.948101276991
FBgn0036213	10477.5262736298	-0.381267176010607	0.17241524209464	-2.21133103650619	0.0270129216206666	0.222233423916915	9341.73591787394	11833.4281915937	8660.60145016937	7508.89659446633	7810.58092427397	7588.32104363996
FBgn0023081	748.173949420707	0.296157739766152	0.13401162213097	2.20994071302798	0.0271092771896012	0.222633286212644	751.428929629163	709.44509455442	777.839125551175	944.573824121869	963.073235227127	838.986518896596
FBgn0005631	164.28342185269	0.482792546860809	0.218468600812627	2.20989444279402	0.0271124890157094	0.222633286212644	260.384391754409	164.312896558926	273.562065342151	374.572378531086	316.845395731528	281.511179067783
FBgn0052104	144.198962457876	0.397035602970176	0.179713798286342	2.20926610397256	0.0271561373780908	0.222782321382516	73.7161291724812	84.089541180156	80.2009267870562	94.2247287609253	108.274505735594	112.327120711776
FBgn0000490	136.264563542552	0.374825567930556	0.169702870489188	2.20871672264634	0.0271943505376659	0.222886529688168	212.825598739905	174.944907512738	226.320423536076	285.000722795391	253.020423929494	256.549596687389
FBgn0086677	131.006876453077	0.885023179060535	0.400878255110459	2.20771061482662	0.0272644524118129	0.222918748851247	275.840999484123	112.119388240208	175.782853231904	469.960375548319	389.788220648139	178.891340392828
FBgn0052066	458.642849037413	0.218958295051848	0.0991807028605253	2.20767033038435	0.0272672625267425	0.222918748851247	406.627680274009	363.42146533033	470.219132395343	482.756326367704	490.084604908479	467.336292344054
FBgn0259152	488.087181192536	0.280972224132176	0.12727716436364	2.20756194197898	0.0272748245990595	0.222918748851247	318.643913197177	294.796667355719	344.973849467612	445.531742165857	403.465000320004	310.633025178244
FBgn0267348	428.225390849494	0.351311367792597	0.159180495263033	2.20700009264379	0.027314052869858	0.223030728900887	603.9966712842	520.001990286482	565.801058840191	758.450903112634	707.773348018989	687.83027003754
FBgn0031344	131.987485014124	-0.407635194107349	0.184761921006062	-2.20627276382331	0.0273649071983938	0.223237342850016	95.1175860290079	115.019027591248	90.0887122813508	80.2655096852327	69.5236299986447	77.658256294561
FBgn0027499	560.937383930822	0.474713744441905	0.215277428137171	2.20512549109155	0.027445289771968	0.223684232031422	353.124038132692	311.227957011612	371.341277452397	528.123788363705	527.695749006106	381.357508589362
FBgn0027603	1002.24534934923	0.474323803197149	0.215264045827164	2.20345112150305	0.027562968425897	0.224238058118274	470.832050843589	398.217137542808	597.661700988474	753.797830087403	700.934958183057	581.050167632519
FBgn0025740	547.446129923187	0.518305177267701	0.235226700761172	2.20342833356295	0.0275645730135088	0.224238058118274	590.918003205212	433.979356205633	543.828202186203	838.716412797866	814.908122115261	590.757449669339
FBgn0052441	485.958946627012	-0.319008101036922	0.14489525552291	-2.2016462850054	0.0276903037633037	0.224948608175936	558.815817920422	631.154832076344	529.545845361111	425.756181808626	458.172119007462	496.458138454515
FBgn0024189	249.827988553262	0.63558879674414	0.288712279092645	2.20146091029327	0.0277034110561185	0.224948608175936	501.745266303017	239.703519685962	440.55577591246	674.695588658478	654.205960970853	504.778665914646
FBgn0033929	490.145817037398	-0.275670158140594	0.125296586310968	-2.20014101147512	0.0277968919293841	0.225357449735551	278.218939134848	318.960328614385	306.521350323133	232.653651261544	225.666864585765	292.605215681292
FBgn0033639	523.644758856259	0.293161299131208	0.133363444825083	2.19821330737004	0.02793390881118	0.225357449735551	565.949636872597	420.44770590078	605.35220081737	651.430223532323	680.41978867526	614.332277473045
FBgn0262117	1099.10685554011	0.383971106143896	0.174674917696135	2.19820401926196	0.0279345703959628	0.225357449735551	885.782519895136	693.013804898527	896.492551482711	1071.37006405941	1078.18613079865	1078.89506066372
FBgn0263594	6846.97449929698	-0.156301967555582	0.0711109814133383	-2.19800042762825	0.0279490754646599	0.225357449735551	4441.99126755467	5146.85984809576	4826.33796404847	4354.1130833598	4310.46505991597	4273.97760535423
FBgn0032633	488.015902128108	0.490600509960675	0.223223483236976	2.19779972450233	0.027963381093892	0.225357449735551	481.532779271853	281.265017050867	444.950347243257	582.797396410168	572.145282939666	539.447530331861
FBgn0050172	98.921461286187	-0.379216938271564	0.172559864512193	-2.1975964071574	0.02797787949382	0.225357449735551	194.991051359466	239.703519685962	204.347566882088	173.32697018985	152.724039669154	166.410549202631
FBgn0031213	913.1892588531	0.240942684380721	0.109693057327044	2.19651717485058	0.0280549472358716	0.225357449735551	1011.81332138357	938.516603286569	998.666334923755	1124.88040384957	1225.2115122712	1132.97848915458
FBgn0264542	530.832136665584	0.698494175785336	0.318007720897241	2.1964692360757	0.0280583747735326	0.225357449735551	1026.08095928792	539.332919293415	948.128764619583	1675.10628908312	1434.92213390645	966.567939951946
FBgn0004167	2761.70756981014	0.303433966015867	0.13817629273648	2.19599151205016	0.0280925509213687	0.225357449735551	3091.32154594276	2526.55242120607	3462.92220866851	3909.74460945025	3811.26260189291	3482.14074206505
FBgn0263459	213.855363946312	-0.688786845627762	0.31368600709739	-2.19578441512667	0.0281073776804313	0.225357449735551	282.974818436299	537.399826392721	239.504137528469	177.980043215081	211.9900849139	269.030387877586
FBgn0003517	14235.5943078139	-0.316027398658128	0.1439606692773	-2.19523429728844	0.0281467952062653	0.225357449735551	13196.3760916995	14592.9183073333	11207.2555363666	10415.9039669793	10787.5599661831	10121.92165525
FBgn0040370	162.777830304271	0.568579318681208	0.259026942452407	2.19505860393529	0.0281593941735147	0.225357449735551	328.155671800077	155.613978505806	291.140350665341	411.796962732933	378.390904254919	356.395926208967
FBgn0259748	159.325258568751	-2.99364337968477	1.36382800901854	-2.19502998903734	0.0281614466075135	0.225357449735551	0	0.966546450346621	4.3945713307976	0	0	0
FBgn0038205	15.3524766968918	0.717392651922829	0.326940119146798	2.19426313844559	0.0282164978238338	NA	30.9132154594276	20.297475457279	19.7755709885892	37.2245842018471	29.6330226223731	49.9231647607892
FBgn0264087	840.855681981503	0.45738515453649	0.208450807136583	2.19421148240889	0.0282202094757071	0.225357449735551	1626.51072109604	1063.20109538128	1434.82753950542	2277.67924585052	1967.17680946985	1414.48966822236
FBgn0010051	1248.88120054183	0.419456713480975	0.191192519624082	2.19389709548104	0.0282428082582092	0.225357449735551	1787.02164751999	1485.58189418276	2032.48924049389	2669.70064822622	2376.34046798646	2046.84975519236
FBgn0031651	236.290593920233	-0.274783236603987	0.125261277442271	-2.19368061874211	0.0282583781179927	0.225357449735551	210.44765908918	213.606765526603	202.15028121669	159.367751114158	180.077599012883	178.891340392828
FBgn0052296	400.346620852342	0.412505374723363	0.188051681580678	2.19357450705056	0.0282660127897052	0.225357449735551	501.745266303017	364.388011780676	482.304203555037	657.246564813862	585.822062611531	549.154812368681
FBgn0029588	31.6815140405246	-1.03312876618128	0.470997883941805	-2.19348918839077	0.0282721527044106	NA	14.2676379043512	14.4981967551993	10.986428326994	8.14287779415404	7.97812147525431	2.77350915337718
FBgn0034629	247.070288645893	0.368550082244016	0.168020815037436	2.19347871965686	0.0282729061607635	0.225357449735551	153.377107471775	96.6546450346621	146.11949674902	186.122921009235	189.195452127459	130.354930208727
FBgn0031050	240.704744039393	-0.346084546730356	0.157781513004116	-2.19344167856552	0.0282755722233521	0.225357449735551	215.20353839063	266.766820295667	235.109566197672	197.755603572312	188.055720488137	178.891340392828
FBgn0035101	328.737224682719	0.348760922074492	0.159018599077321	2.19320836743702	0.0282923699608741	0.225357449735551	362.635796735593	258.067902242548	342.776563802213	493.225740674473	392.067683926783	336.981362135327
FBgn0036773	275.483898956763	0.399367044737531	0.182096135268461	2.19316595681041	0.0282954243287054	0.225357449735551	318.643913197177	259.034448692895	342.776563802213	461.817497754165	428.539096385088	320.340307215064
FBgn0035334	381.430061877516	-0.309720936666034	0.141285956080745	-2.19215656854832	0.0283682032847297	0.225565211012353	403.060770797921	462.009203265685	414.188347927674	302.449746640007	336.220833600003	396.611808932936
FBgn0002736	378.682688721447	-0.37341830951231	0.170348220614067	-2.19208811319673	0.028373144889845	0.225565211012353	174.778564328302	222.305683579723	172.486924733806	116.326825630772	151.584308029832	174.731076662762
FBgn0283450	619.525209193447	-0.313907526970077	0.143324164987474	-2.19019260986108	0.0285102709800712	0.226311730584112	538.603330889257	577.994777307279	408.695133764177	380.388719812625	387.508757369495	461.7892740373
FBgn0264449	428.387561138656	0.708803595654465	0.323643637552286	2.19007424652356	0.0285188526236817	0.226311730584112	626.58709796609	318.960328614385	499.882488878227	973.655530529562	794.392952607465	592.144204246027
FBgn0036249	154.922607177303	-0.41549063942857	0.189888240152011	-2.18807988897026	0.0286637835589677	0.226880904502901	89.1727369021949	113.085934690555	98.877854942946	77.9389731726173	77.501751473899	70.724483411118
FBgn0036988	293.927768032177	0.272610116139761	0.124615106014355	2.18761693392418	0.0286975172915006	0.226880904502901	241.360874548608	270.633006097054	261.476994182457	310.592624434161	306.58781097763	318.953552638375
FBgn0053179	186.37161189993	0.725847815632723	0.331832341012034	2.18739322821581	0.0287138301033409	0.226880904502901	342.423309704429	221.339137129376	324.099635646323	579.307591641245	525.416285727462	361.942944515722
FBgn0033730	27.3845661149381	0.581346155372284	0.26582527215215	2.18694840661929	0.0287462906006083	NA	42.8029137130536	39.6284044642115	37.3538563117796	75.6124366600018	49.0084604908479	54.083428490855
FBgn0032685	134.140906555142	0.599460565926891	0.27416058940245	2.18653077465821	0.0287767957110484	0.226880904502901	275.840999484123	175.911453963085	226.320423536076	430.409254833856	374.971709336952	219.107223116797
FBgn0085478	463.672693960547	0.580337631890849	0.265429276077675	2.18641153857127	0.028785510191326	0.226880904502901	640.854735870441	397.250591092461	631.719628802155	953.879970172331	884.431752113906	655.934914773702
FBgn0017577	812.878670659465	-0.850469830451619	0.389038624811099	-2.18608070307819	0.0288097015107248	0.226880904502901	7.1338189521756	11.5985574041595	31.8606421482826	11.6326825630772	6.83838983593226	9.70728203682012
FBgn0052647	1291.39611146323	0.548935018099934	0.251109668497959	2.18603696696925	0.0288129008876656	0.226880904502901	2371.99480159839	1545.50777410425	2079.73088229996	3222.25306997239	3188.96912682308	2360.25628952398
FBgn0034797	297.683500148922	0.374343906025743	0.171262509201061	2.18579015204236	0.0288309615890591	0.226880904502901	466.076171542139	345.057082773744	450.443561406754	608.389298048938	535.673870481361	488.137610994383
FBgn0003093	564.00465398929	0.433503709241513	0.198336895566697	2.18569373087588	0.0288380198625833	0.226880904502901	1028.45889893865	597.325706314212	826.179410189949	1184.20708492126	1236.60882866442	886.136174504008
FBgn0037874	9942.59919128735	-0.280039873295463	0.128133819011461	-2.1855266272085	0.0288502557974961	0.226880904502901	9283.47639643118	11553.1297209932	9130.82058256472	7798.55039028696	8308.6436506577	8575.69030224223
FBgn0015754	1646.68907511145	0.225284163386462	0.103180192798994	2.18340514080392	0.029005987708816	0.227735803352823	1693.09303131634	1458.51859357305	1689.71267669168	1925.20896418928	1953.50002979798	1776.43261273808
FBgn0262614	2012.47570481356	0.484293380840038	0.221906330466557	2.18242255559728	0.0290783611522557	0.227735803352823	3052.08554170579	2146.69966621985	2876.24693600703	4100.52060348471	3876.22730533427	3317.1169474391
FBgn0030598	23.4460196873931	3.03262338143919	1.38960424365012	2.18236479580208	0.0290826203487188	NA	0	0	0	1.16326825630772	2.27946327864409	1.38675457668859
FBgn0031378	87.2885184342457	-0.531628983825432	0.243613770174515	-2.18226163260227	0.029090228919643	0.227735803352823	38.0470344116032	46.3942296166378	47.2416418060742	27.9184381513853	34.1919491796613	29.1218461104604
FBgn0036298	590.623820919333	-0.269414391253569	0.123506408561369	-2.18137985220176	0.029155332590734	0.227735803352823	263.951301230497	296.729760256413	254.885137186261	203.571944853851	217.68874311051	259.323105840766
FBgn0033130	245.109685764758	-0.406516144939818	0.186364578903929	-2.1812951116069	0.0291615957629999	0.227735803352823	363.824766560955	423.34734525182	402.103276767981	303.613014896315	275.815056715935	318.953552638375
FBgn0000317	732.407212869015	0.381228790063689	0.174798825295534	2.18095739155651	0.0291865681351941	0.227735803352823	593.295942855937	444.611367159446	548.222773517001	787.532609520327	667.882740642718	607.398504589602
FBgn0032069	411.022213178442	2.4950111776993	1.14402184582142	2.18091217996615	0.0291899126574352	0.227735803352823	1.1889698253626	0.966546450346621	0	11.6326825630772	0	0
FBgn0014464	341.695712705439	0.832213664587215	0.381604387114059	2.18082834655271	0.0291961150973685	0.227735803352823	17.834547380439	4.83273225173311	15.3809996577916	20.938828613539	22.7946327864409	22.1880732270174
FBgn0028523	175.677563768759	0.286994829384091	0.131630516195833	2.18030619098321	0.0292347724677568	0.227735803352823	258.006452103684	262.900634494281	290.041707832642	309.429356177854	359.015466386444	320.340307215064
FBgn0000575	633.997411130705	0.245777681516484	0.112729600583805	2.18024086170491	0.0292396121672234	0.227735803352823	1020.13611016111	789.66844993319	951.424693117681	1153.96211025726	1100.98076358509	1013.71759555936
FBgn0034295	1305.20489126195	1.87009835323804	0.857780770822863	2.18015886675108	0.0292456874627295	0.227735803352823	0	0	4.3945713307976	15.1224873320004	0	0
FBgn0038224	1186.98800926647	-0.31750132068869	0.145659914006722	-2.17974398003584	0.0292764445386105	0.227772302701549	1191.34776501332	1465.28441872548	1107.431975361	981.798408323716	1042.85444997967	997.076540639095
FBgn0266369	1073.94345172525	0.285500385629039	0.131028370243881	2.17892037501224	0.0293375838747295	0.228012056098107	1446.97627746628	1336.73374082938	1650.1615347145	1993.84179131143	1811.03357488273	1596.15451776857
FBgn0033744	180.007308373571	0.351960154850122	0.161586247039856	2.17815662717452	0.0293943779162476	0.228012056098107	266.329240881222	226.171869381109	276.857993840249	325.715111766162	339.640028517969	314.79328890831
FBgn0003204	1336.13786208509	0.29171064729657	0.133932561180922	2.17804128230262	0.0294029634412667	0.228012056098107	1011.81332138357	810.932471840815	886.604765988416	1300.53391055203	1149.98922407594	859.787837546925
FBgn0028950	287.403437118418	3.03130352694095	1.39187187851854	2.1778610328469	0.0294163843626497	0.228012056098107	0	0	0	4.65307302523088	0	0
FBgn0264308	364.811387344086	0.787823643994805	0.361789564463869	2.17757426243698	0.0294377474280262	0.228012056098107	791.853903691491	329.592339568198	622.93048614056	1190.0234262028	1107.81915342103	711.405097841246
FBgn0038750	12.1124771144275	-0.926877224416802	0.425797716369266	-2.17680177413864	0.0294953606314612	NA	17.834547380439	17.3978361062392	35.1565706463808	8.14287779415404	11.3973163932204	18.0278094969517
FBgn0039633	625.888684645175	0.556785724276082	0.255785764109696	2.17676588145578	0.0294980399116868	0.228149226899921	856.058274261071	519.035443836136	722.906983916205	1220.2684008668	1085.02452063459	777.969317522298
FBgn0266377	330.413168812298	0.266178974213686	0.122325801949949	2.17598388868601	0.0295564652935905	0.228149226899921	512.44599473128	419.481159450434	481.205560722337	635.144467944015	532.254675563394	528.353493718352
FBgn0003963	153.223472303072	0.501048188005561	0.230295327881353	2.17567673914643	0.0295794407058789	0.228149226899921	145.054318694237	109.219748889168	152.711353745217	208.225017879082	184.636525570171	181.664849546205
FBgn0259245	61.2743733125287	0.915778627364496	0.420933142790937	2.17559164216093	0.0295858088507276	0.228149226899921	124.841831663073	45.4276831662912	85.6941409505532	200.082140084928	176.658404094917	104.006593251644
FBgn0034289	311.846177180745	-2.58676319656378	1.1889945394489	-2.17558879434614	0.0295860219843895	0.228149226899921	30.9132154594276	25.1302077090122	82.398212452455	0	22.7946327864409	0
FBgn0030834	252.327133575017	-0.348054137405732	0.160127888759703	-2.17360098919459	0.0297351140730491	0.228555524662316	150.99916782105	150.781246254073	137.330354087425	110.510484349233	109.414237374916	126.194666478662
FBgn0051715	283.997579249581	-0.550713803419365	0.253454435024084	-2.17283159147337	0.0297929946717445	0.228555524662316	174.778564328302	296.729760256413	192.262495722395	129.122776450157	132.208870161357	194.145640736402
FBgn0038106	169.036090709866	-0.33315791408618	0.153351979446519	-2.17250481727474	0.029817606681102	0.228555524662316	154.566077297138	181.710732665165	145.020853916321	122.143166912311	133.348601800679	127.58142105535
FBgn0031277	65.6550848947301	3.54939182473144	1.63411331262865	2.17205979371275	0.029851153119499	0.228555524662316	1.1889698253626	0	2.1972856653988	0	38.7508757369495	0
FBgn0266580	1163.64992627469	0.406995805040457	0.187401337416613	2.17178708888113	0.0298717259839718	0.228555524662316	504.123205953742	380.819301436569	503.178417376325	720.063050654479	616.594816873226	500.61840218458
FBgn0004087	138.418076237713	-0.447854868095525	0.206246871039652	-2.17145048474177	0.0298971362220443	0.228555524662316	85.6058274261072	127.584131445754	97.7792121102466	61.6532175843092	79.7812147525431	88.7522929080697
FBgn0039688	341.103074269356	0.424682439166211	0.195578436351749	2.17141749922991	0.0298996272969024	0.228555524662316	615.886369537826	480.373585822271	582.280701330682	838.716412797866	787.554562771532	624.039559509865
FBgn0037602	39.0037462873233	-0.724490904543642	0.333680919803787	-2.17120866536109	0.0299154026288885	0.228555524662316	39.2360042369658	55.0931476697574	47.2416418060742	29.081706407693	22.7946327864409	34.6688644172147
FBgn0259992	65.0645902886255	-0.637328466940396	0.293566106939878	-2.17098790314687	0.029932086808528	0.228555524662316	90.3617067275575	142.082328200953	121.949354429633	63.9797540969246	77.501751473899	87.3655383313811
FBgn0262139	72.6788156998746	0.382737155319901	0.176331829175792	2.17055058697506	0.0299651607451201	0.228555524662316	137.920499742062	109.219748889168	126.343925760431	155.877946345235	159.562429505086	170.570812932696
FBgn0033010	1229.9858598305	0.406518965773371	0.187288906121229	2.17054482399635	0.0299655968050698	0.228555524662316	1552.79459192355	1107.66223209723	1423.84111117842	1819.35155286527	1873.71881504544	1718.18892051716
FBgn0005655	617.749243943045	-0.884603982105031	0.407550235116481	-2.17053974181172	0.02996598135677	0.228555524662316	16.6455775550764	11.5985574041595	19.7755709885892	5.8163412815386	5.69865819661022	15.2543003435745
FBgn0053868	48.6221450486467	-0.873945413148396	0.402671055414509	-2.17037058263043	0.0299787834798002	0.228555524662316	19.0235172058016	21.2640219076257	15.3809996577916	9.30614605046176	11.3973163932204	9.70728203682012
FBgn0260971	149.219585511817	0.914316539115594	0.421497081025648	2.16921203081821	0.0300665901759582	0.229025107556536	260.384391754409	144.015421101647	205.446209714788	523.470715338474	349.897613271867	274.577406184341
FBgn0032421	194.101690160196	-0.419465562278821	0.193533612353761	-2.16740418978011	0.0302040480825713	0.229788804155532	102.251404981184	116.952120491941	104.371069106443	55.8368763027706	94.5977260637297	92.9125566381354
FBgn0038494	134.686942223706	0.541249277980777	0.24974564540887	2.16720206310174	0.0302194501516203	0.229788804155532	248.494693500783	171.078721711352	255.98378001896	374.572378531086	379.530635894241	226.04099600024
FBgn0002579	8996.65590932831	-0.333222073986091	0.153809586058645	-2.1664584277539	0.0302761733271686	0.229881827071618	8611.70844510131	10759.5950852586	8294.75338688047	6909.81344246786	7000.23172871599	8052.88382683063
FBgn0033792	78.7730988242759	0.819099667993056	0.378111675550759	2.1662903341981	0.0302890078723338	0.229881827071618	14.2676379043512	5.79927870207973	14.2823568250922	19.7755603572312	29.6330226223731	8.32052746013153
FBgn0032216	1072.62650653154	-0.266604400160047	0.123085633830603	-2.16600745239662	0.0303106174644047	0.229881827071618	527.902602460994	609.890810168718	583.379344163382	465.307302523088	452.473460810851	515.872702528155
FBgn0031632	254.73379717433	0.653050306112373	0.301613969338651	2.16518587499218	0.0303734536086089	0.229991810482197	315.077003721089	169.145628810659	375.735848783195	473.450180317242	524.27655408814	352.235662478902
FBgn0030008	155.117186990584	-0.419865682460609	0.193921738214776	-2.16512953279942	0.0303777668875422	0.229991810482197	90.3617067275575	74.4240766766898	87.891426615952	60.4899493280015	61.5455085233904	66.5642196810523
FBgn0000346	634.815750178974	0.382095172412284	0.176524091724323	2.16454971488538	0.0304221854525771	0.230128687704906	1206.80437274304	805.133193138735	1105.2346896956	1477.3506855108	1425.80428079188	1155.16656238159
FBgn0030049	476.252206242214	0.528555464073087	0.244240361861018	2.16407910652317	0.0304582787251466	0.230167613033151	418.517378527635	269.666459646707	377.933134448594	575.817786872322	551.630113431869	407.705845546445
FBgn0003227	93.7465606208722	0.676976928141369	0.312896417127147	2.16358159149606	0.0304964755944581	0.230167613033151	21.4014568565268	13.5316503048527	17.5782853231904	27.9184381513853	28.4932909830511	26.3483369570832
FBgn0263344	18.7814897600711	0.681110357660453	0.314818633797259	2.16350077327088	0.0305026843217106	NA	22.5904266818894	25.1302077090122	35.1565706463808	48.8572667649242	41.0303390155936	42.9893918773463
FBgn0266557	4388.74215188179	0.600214292090193	0.277450002115544	2.16332415755482	0.0305162563126728	0.230167613033151	4636.98231891414	3265.96045572123	4470.37768625386	7825.30556018203	6375.65879036751	4554.10202984532
FBgn0263977	1061.72237095201	0.186252431494982	0.0861039970591658	2.16311016742927	0.030532707280007	0.230167613033151	996.356713653858	1006.17485481083	992.074477927559	1088.81908790403	1105.53969014238	1216.18376375589
FBgn0283652	70.0412525471253	-0.518749566470198	0.239941174424587	-2.16198644402834	0.030619221099931	0.230534733747541	49.9367326652292	47.3607760669844	45.0443561406754	20.938828613539	35.3316808189834	44.3761464540348
FBgn0287844	68.2018140600486	0.645271630408669	0.298507110596294	2.1616625115552	0.0306441992439906	0.230534733747541	139.109469567424	78.2902624780763	112.061568935339	204.735213110159	184.636525570171	123.421157325284
FBgn0024921	1463.59390932902	0.373102281634317	0.172647130317094	2.16106853875333	0.0306900454187092	0.230534733747541	949.986890464717	758.738963522098	1003.06090625455	1203.98264527849	1163.66600374781	1142.6857711914
FBgn0037710	196.087094940384	-0.353614083089958	0.163640141362531	-2.16092506487485	0.030701128370455	0.230534733747541	109.385223933359	101.487377286395	107.666997604541	69.7960953784632	76.3620198345769	105.393347828333
FBgn0028475	575.658886508928	0.282209043642415	0.130625977055164	2.16043584901368	0.0307389447561005	0.230534733747541	452.99750346315	389.518219489688	499.882488878227	589.777005948014	517.438164252208	522.806475411598
FBgn0041721	1719.25366459571	-0.496149622656172	0.229653630048314	-2.16042577925632	0.0307397235682597	0.230534733747541	1568.25119965327	2075.1752288942	1390.88182619744	1044.61489416433	1179.62224669832	1346.53869396462
FBgn0033918	594.882699417401	-0.227132685537106	0.105198328173449	-2.1590902581894	0.0308431652897737	0.23081942472459	479.154839621128	433.012809755286	448.246275741355	378.062183300009	381.810099172885	402.158827239691
FBgn0027580	3204.02148953025	0.468766842291001	0.217120755085803	2.1590144254323	0.030849047811247	0.23081942472459	4917.57919769971	3473.76794254576	4996.62760311687	6834.20100580786	6760.88808445836	4929.91252012793
FBgn0035631	590.631115962871	-0.278641003658067	0.129079337360247	-2.15868015250503	0.0308749896137181	0.23081942472459	398.304891496471	481.340132272617	411.991062262275	326.878380022469	330.522175403393	411.866109276511
FBgn0004198	632.232652591357	0.602816231298082	0.279297877967495	2.15832728728514	0.0309023946193121	0.23081942472459	1161.62351937926	703.64581585234	1059.09169072222	1637.88170488127	1691.36175275391	1109.40366135087
FBgn0034061	210.485278143278	-0.399987981062472	0.185331294762833	-2.15823227034772	0.0309097776041857	0.23081942472459	205.69177978773	260.000995143241	208.742138212886	164.020824139389	162.981624423052	185.825113276271
FBgn0031317	385.233187336949	-0.533248958856683	0.247157837519395	-2.15752397014251	0.0309648615194935	0.231033300679603	268.707180531947	483.273225173311	354.861634961906	223.347505211082	208.570889995934	335.594607558638
FBgn0035557	25.3739151600619	0.816909743803357	0.378693578578763	2.15717875879813	0.0309917388455193	NA	28.5352758087024	7.73237160277297	17.5782853231904	45.3674619960011	28.4932909830511	18.0278094969517
FBgn0052364	44.1775735253797	-0.593096476231911	0.275076300132314	-2.15611623373815	0.0310745902001306	0.231627179361266	34.4801249355154	54.1266012194108	45.0443561406754	29.081706407693	27.3535593437291	33.2821098405261
FBgn0051030	464.313212265413	-0.223669915377486	0.103751515531711	-2.15582311478739	0.0310974798432832	0.231627179361266	1095.04120915895	1020.67305156603	938.240979125288	865.471582692944	866.196045884753	883.362665350631
FBgn0037215	954.328403157497	0.179715339127335	0.083432939504354	2.15400943793856	0.0312394317818653	0.232377036293344	979.711136098782	940.449696187262	1023.93512007584	1184.20708492126	1156.82761391187	987.369258602275
FBgn0262740	451.645987978274	0.667884878175065	0.310322239768078	2.15223014204272	0.0313792327441189	0.232377036293344	495.800417176204	304.462131859186	507.572988707123	786.369341264019	736.26663900204	553.315076098747
FBgn0028341	1031.34088109193	0.408307764131294	0.189747597218286	2.1518468223952	0.0314094207015719	0.232377036293344	958.309679242255	713.311280355807	1017.34326307964	1320.30947090926	1274.21997276205	970.728203682012
FBgn0033528	161.544814500438	-0.42291579101801	0.19660458232692	-2.1510983417201	0.031468438376952	0.232377036293344	103.440374806546	114.052481140901	90.0887122813508	67.4695588658478	67.2441667200006	97.0728203682012
FBgn0038084	57.8459171639944	0.693806909075049	0.322591048527721	2.15073205608626	0.0314973546356185	0.232377036293344	115.330073060172	57.0262405704507	85.6941409505532	167.510628908312	158.422697865764	88.7522929080697
FBgn0005585	3248.39332148596	-0.15565512591189	0.0723948341847153	-2.15008608921925	0.0315484057479539	0.232377036293344	2923.67680056663	3002.09327477661	2933.3763633074	2712.7415737096	2638.47874503053	2601.55158586779
FBgn0085413	565.792426912709	0.885358599829728	0.411784913320008	2.15005108538713	0.0315511741457147	0.232377036293344	1206.80437274304	433.012809755286	911.873551140502	1915.90281813882	1722.13450701561	1073.34804235697
FBgn0038156	168.99302077239	0.756813814688885	0.352167138373826	2.14901883856502	0.0316329066374018	0.232377036293344	325.777732149352	165.279443009272	280.153922338347	522.307447082166	476.407825236614	302.312497718112
FBgn0015396	693.79401560064	0.506062291574821	0.235545304252468	2.14847115369534	0.0316763455754779	0.232377036293344	142.676379043512	97.6211914850088	157.105925076014	211.714822648005	217.68874311051	131.741684785416
FBgn0283480	175.399031203143	3.02773307953604	1.40929764944515	2.14839858757168	0.0316821049025966	0.232377036293344	0	0	0	2.32653651261544	2.27946327864409	0
FBgn0035574	270.520823194447	0.532983715716154	0.248094754357169	2.1483070736306	0.031689369333997	0.232377036293344	425.651197479811	307.361771210226	379.031777281293	646.777150507092	528.835480645428	431.280673350151
FBgn0052791	108.712431695142	0.454655964352499	0.2116395633508	2.14825601203349	0.0316934232549309	0.232377036293344	139.109469567424	91.821912782929	127.44256859313	183.79638449662	178.937867373561	124.807911901973
FBgn0019624	1703.94400638775	-0.333416853512553	0.155227484065462	-2.14792409681744	0.0317197857612613	0.232377036293344	2169.86993128674	2363.20607109749	1901.75074340266	1512.24873320004	1670.84658324612	1926.20210702045
FBgn0283472	767.716722728278	0.313536542877467	0.145972620570778	2.14791336657166	0.0317206383292429	0.232377036293344	871.514881990785	759.705509972444	918.465408136699	1083.00274662249	1071.34774096272	1012.33084098267
FBgn0011676	145.358404029365	0.537342657151543	0.250192506892236	2.14771682743876	0.0317362577548187	0.232377036293344	280.596878785573	171.078721711352	242.800066026567	387.368329350471	355.596271468478	262.096614994143
FBgn0051998	1377.67172605943	0.473671101361548	0.220558916305678	2.14759443551615	0.0317459878596486	0.232377036293344	1284.08741139161	873.757991113346	1155.77225999977	1616.94287626773	1544.33637128137	1438.06449602607
FBgn0037358	867.838596951319	-0.329753724981828	0.153554757374825	-2.14746667976495	0.0317561471150184	0.232377036293344	876.270761292236	1025.50578381777	777.839125551175	682.838466452632	673.581398839328	777.969317522298
FBgn0053087	2448.07082917766	0.54944015230067	0.255860949308308	2.1474170004685	0.0317600984112904	0.232377036293344	3791.62477308133	2318.74493438154	3908.97119874447	5788.42284338722	5222.25037137361	3649.93804584437
FBgn0086686	701.272262110728	0.484652128496588	0.225703655242875	2.14729410551665	0.0317698748048038	0.232377036293344	828.711968277732	577.028230856933	730.597483745101	1100.4517704671	1028.03793866848	858.401082970236
FBgn0004654	1943.16654299367	0.251055724148557	0.116920215245434	2.14723966785001	0.0317742061901069	0.232377036293344	2210.29490534907	2151.53239847158	1936.90731404904	2772.0682547813	2739.91486093019	1978.89878093462
FBgn0003741	67.714025182107	-0.415014544394626	0.193278435790999	-2.14723666764046	0.031774444919386	0.232377036293344	76.0940688232064	78.2902624780763	80.2009267870562	58.163412815386	54.7071186874581	63.7907105276751
FBgn0036260	91.3036694091868	0.321397360563315	0.149687266705683	2.14712558814538	0.0317832846938933	0.232377036293344	184.290322931203	169.145628810659	169.190996235708	215.204627416928	214.269548192544	223.267486846863
FBgn0051760	160.08954376389	0.627180384663649	0.292173705062377	2.14660105887952	0.0318250555489016	0.232487884891934	298.431426166012	173.978361062392	295.534921996139	479.266521598781	422.840438188478	281.511179067783
FBgn0005533	6897.08709127597	-0.309376790529655	0.144256660100973	-2.14462743219693	0.0319826471796743	0.23305498718589	6799.71843124871	7805.82913299931	5961.23601022695	5241.68676292259	5658.76758923395	5698.17455561341
FBgn0260861	128.651548135514	-0.358692079920151	0.167266837820206	-2.14443032817842	0.0319984223656293	0.23305498718589	96.3065558543705	127.584131445754	115.357497433437	100.041070042464	80.9209463918651	84.5920291780039
FBgn0029939	119.174889695272	0.779787058599416	0.363666340040189	2.14423765068068	0.0320138497219642	0.23305498718589	229.471176294982	85.0560876305027	165.895067737609	309.429356177854	307.727542616952	205.239677349911
FBgn0020908	216.724077988232	0.573872431814656	0.267696762902553	2.1437406474114	0.0320536733558729	0.23305498718589	80.8499481246567	50.2604154180243	82.398212452455	122.143166912311	88.8990678671194	105.393347828333
FBgn0035722	242.063519589377	-0.349363796724939	0.162969601806384	-2.143735965803	0.0320540486832649	0.23305498718589	204.502809962367	248.402437739082	188.966567224297	161.694287626773	176.658404094917	166.410549202631
FBgn0027496	502.760473327654	-0.360933407161236	0.168390479219469	-2.14343120130218	0.0320784899440839	0.23305498718589	433.973986257349	478.440492921578	393.314134106385	324.551843509854	355.596271468478	336.981362135327
FBgn0259168	876.902715918734	0.4249673693349	0.198311687482687	2.14292649479876	0.0321190011237481	0.23305498718589	856.058274261071	733.608755813086	894.295265817312	1226.08474214834	1050.83257145492	1056.7069874367
FBgn0000439	154.231831252311	0.386566981429604	0.180431914893453	2.14245346593964	0.0321570094369555	0.23305498718589	340.045370053703	266.766820295667	283.449850836445	475.776716829858	394.347147205427	289.831706527915
FBgn0003353	194.417326414645	0.326688288926346	0.152533349791786	2.1417499148369	0.0322136117250453	0.23305498718589	266.329240881222	238.736973235615	273.562065342151	352.470281661239	363.574392943732	256.549596687389
FBgn0086361	753.777158300421	0.23285791012191	0.108725488028028	2.14170489684886	0.0322172364291235	0.23305498718589	787.098024390041	761.638602873138	845.954981178538	949.2268971471	992.7062578495	869.495119583745
FBgn0037956	309.643741825316	0.303657643219634	0.141798801666012	2.14146833155091	0.0322362896528882	0.23305498718589	576.650365300861	452.343738762219	428.470704752766	678.185393427401	593.800184086785	522.806475411598
FBgn0020622	906.522201415846	0.383521776743638	0.179097461569435	2.14141380554938	0.0322406826047326	0.23305498718589	533.847451587807	432.04626330494	577.886129999885	708.430368091402	713.4720062156	589.37069509265
FBgn0039732	84.1615841541867	-0.47490126577853	0.22180798096575	-2.14104679061057	0.0322702649466117	0.23305498718589	54.6926119666796	68.6247979746101	53.8334988022706	40.7143889707702	44.4495339335597	42.9893918773463
FBgn0036741	1208.08055202154	0.264971335899682	0.123762047631544	2.14097407864919	0.0322761284760131	0.23305498718589	1517.12549716268	1371.52941304186	1616.10360690082	2028.73983900066	1895.37371619256	1483.82739705679
FBgn0266452	695.359008278436	0.20875091534631	0.0975283418415211	2.1404128421	0.0323214176003003	0.233189286188128	388.79313289357	359.555279528943	401.004633935281	468.797107292011	470.709167040004	382.74426316605
FBgn0266717	3769.0082661959	0.383103415950009	0.179105273430317	2.1389845681962	0.0324369181871604	0.233721408474864	4381.35380646118	3633.24810685295	5038.37603075945	6444.50613994477	5414.86501841903	5161.50053443493
FBgn0086350	242.040879980623	0.672381725581597	0.314367555785099	2.13883943558487	0.0324486744282946	0.233721408474864	20.2124870311642	13.5316503048527	26.3674279847856	45.3674619960011	23.9343644257629	24.9615823803946
FBgn0037098	914.558701688451	0.419065441266094	0.196066121343747	2.13736793686748	0.0325680771480343	0.234227041781363	947.608950813992	703.64581585234	949.227407452282	1236.55415645511	1224.07178063188	1013.71759555936
FBgn0051323	105.717527211616	0.482716163985646	0.225851815956607	2.13731362726077	0.0325724912171633	0.234227041781363	175.967534153665	95.6880985843155	140.626282585523	193.102530547082	219.968206389154	159.476776319188
FBgn0085265	54.6183843113203	-2.40894973580463	1.12808035554497	-2.13544161456554	0.032724954521053	0.235129874712533	4.7558793014504	1.93309290069324	6.5918569961964	1.16326825630772	0	1.38675457668859
FBgn0034490	281.336854618202	0.420715917434867	0.197110253397502	2.13441924092316	0.0328084779467526	0.235536295662101	78.4720084739316	105.353563087782	88.9900694486514	140.755459013234	120.811553768137	104.006593251644
FBgn0013469	159.122237468473	0.514229571772084	0.241019569141647	2.13355941844652	0.0328788628975089	0.23584780388796	211.636628914543	188.476557817591	271.364779676752	380.388719812625	319.124859010172	257.936351264077
FBgn0023531	395.750232893795	0.53309992100222	0.249973641801573	2.13262453257127	0.0329555391888746	0.236159540344348	686.03558923422	410.782241397314	599.858986653873	886.410411306483	874.174167360008	691.990533767606
FBgn0020521	519.891599739301	0.238648829699377	0.11193635293758	2.13200469227774	0.0330064608173758	0.236159540344348	898.861187974125	792.568089284229	922.859979467496	1137.67635466895	1018.92008555391	923.5785480746
FBgn0000359	7543.06246199367	2.04586281274935	0.959715128224241	2.13173967209916	0.0330282535189985	0.236159540344348	2.3779396507252	0	1.0986428326994	10.4694143067695	2.27946327864409	0
FBgn0035497	297.480536080734	0.242537533868469	0.113775880801407	2.13171308505897	0.033030440460203	0.236159540344348	369.769615687768	366.321104681369	386.722277110189	456.001156472626	437.656949499665	434.054182503528
FBgn0015400	242.642069941513	0.826834733448781	0.388020074096347	2.13090710673766	0.0330967957993051	0.236329350171328	456.564412939238	212.640219076257	415.286990760373	741.001879268018	759.061271788481	421.573391313331
FBgn0086906	5762.26789694881	0.621268545483942	0.291605293185554	2.13051189399575	0.0331293749127101	0.236329350171328	7975.60958853232	4745.74307120191	7316.96126577801	13904.5454676462	9990.88755029704	6925.45235598281
FBgn0013759	982.363943805096	0.499970941613197	0.234679708944242	2.13043958449763	0.03313533867001	0.236329350171328	1564.68429017718	945.282428438996	1337.04832739517	2120.63803124897	1961.47815127324	1354.85922142475
FBgn0266569	174.118378407399	-0.351973929570097	0.165279213414215	-2.12957166421162	0.0332069925032626	0.236647221452696	135.542560091336	151.74779270442	113.160211768038	97.7145335298485	101.436115899662	116.487384441841
FBgn0036271	195.257179333359	-0.352884204131478	0.165760296292518	-2.12888256129044	0.0332639779152997	0.236773473228308	187.857232407291	205.87439392383	169.190996235708	125.632971681234	139.047259997289	178.891340392828
FBgn0032642	233.541681255983	-0.458450756147309	0.215366320971229	-2.12870217627274	0.0332789086785353	0.236773473228308	286.541727912386	338.291257621317	253.786494353561	207.061749622774	185.776257209493	248.229069227257
FBgn0261705	24.4577543711237	0.570444468674839	0.268108471437069	2.12766297766438	0.0333650365777742	NA	36.8580645862406	34.7956722124784	42.8470704752766	54.6736080464629	56.9865819661022	58.2436922209207
FBgn0034976	244.304913863623	0.542387929947773	0.254985477021747	2.12713263626977	0.0334090642748147	0.237506098103382	174.778564328302	151.74779270442	209.840781045585	283.837454539084	263.278008683392	232.974768883683
FBgn0030723	91.1908740679197	0.501147247539867	0.235777069613273	2.12551308896094	0.0335438230762365	0.238270229444779	165.266805725401	116.952120491941	146.11949674902	224.51077346739	191.474915406103	188.598622429648
FBgn0267253	128.067996782706	0.839149277309231	0.394934947224691	2.12477848112999	0.0336051012189062	0.238335868347925	252.061602976871	106.320109538128	191.163852889696	380.388719812625	356.7360031078	244.068805497192
FBgn0016685	1320.73467957671	-0.216234820868559	0.101769617491473	-2.12474829127345	0.0336076215868884	0.238335868347925	381.659313941394	394.350951741421	393.314134106385	358.286622942778	314.565932452884	334.20785298195
FBgn0034674	464.372729464177	0.222319145723356	0.10467792515123	2.12383982011649	0.0336835400028847	0.238680526362695	386.415193242845	394.350951741421	383.426348612091	468.797107292011	446.774802614241	442.37470996366
FBgn0053513	105.954591341511	0.614985174529923	0.289648400206036	2.12321274376956	0.0337360285538237	0.23885873701358	233.038085771069	106.320109538128	161.500496406812	273.368040232314	281.513714912545	209.399941079977
FBgn0028481	489.071117999524	0.60232887355542	0.283838608276596	2.12208225375901	0.0338308313673529	0.239336011057945	1080.7735712546	537.399826392721	766.852697224181	1437.79956479634	1285.61728915527	894.45670196414
FBgn0037074	1052.481091644	0.228936374435419	0.107918869239363	2.12137484435312	0.0338902704683372	0.239523599337273	1130.71030391983	1087.36475663995	1295.29989975259	1328.45234870342	1466.83461980747	1320.19035700754
FBgn0036689	267.253867824711	-0.863064101537234	0.406891823183292	-2.12111439051566	0.0339121772210377	0.239523599337273	20.2124870311642	8.69891805311959	18.6769281558898	10.4694143067695	10.2575847538984	4.16026373006577
FBgn0031474	802.55889706869	0.273179443005616	0.128825660779696	2.12053593478382	0.0339608743966252	0.239673796125456	1035.59271789082	792.568089284229	908.577622642404	1152.79884200095	1164.80573538713	984.595749448898
FBgn0032873	298.286961731917	-0.33667689673947	0.158812566035338	-2.11996383626567	0.0340090951799562	0.239820391111604	126.030801488436	138.216142399567	153.809996577916	125.632971681234	103.715579178306	101.233084098267
FBgn0038961	419.811585182193	-0.272024180341603	0.128386644439862	-2.11878876909992	0.0341083223113992	0.24021556261061	357.879917434142	309.294864110919	269.167494011353	261.735357669237	249.601229011528	263.483369570832
FBgn0004852	507.428663839598	0.460621197972841	0.217412676783869	2.11864921947834	0.034120122833898	0.24021556261061	777.58626578714	601.191892115598	873.421051996023	1105.10484349233	1050.83257145492	941.606357571552
FBgn0021800	374.270909804047	0.540063516767204	0.255004840596623	2.11785594149367	0.0341872699147353	0.24049450663852	445.863684510975	344.090536323397	433.963918916263	659.573101326477	657.625155888819	460.402519460611
FBgn0032470	33.3600086262162	0.790307869772138	0.373320969860532	2.11696618614107	0.0342627176747088	NA	54.6926119666796	27.0633006097054	48.3402846387736	110.510484349233	70.6633616379667	41.6026373006577
FBgn0011742	868.64269345402	0.286840023993417	0.135519897314136	2.11658973832101	0.03429468178253	0.241056021507614	426.840167305173	340.224350522011	403.20191960068	497.878813699704	518.57789589153	406.319090969756
FBgn0264672	115.3631180121	-0.330655548825318	0.156271126640976	-2.11590941930675	0.0343525121716772	0.241203662381901	130.786680789886	135.316503048527	119.752068764235	104.694143067695	90.0387995064415	113.713875288464
FBgn0036364	161.757245914349	-0.46972401329878	0.222050303666674	-2.1153945999727	0.0343963296595519	0.241203662381901	273.463059833398	375.986569184836	264.772922680555	188.449457521851	243.902570814917	228.814505153617
FBgn0004880	378.268030886806	1.21777578265762	0.575758599846232	2.11508049203755	0.0344230875765738	0.241203662381901	715.759834868285	213.606765526603	455.936775570251	1347.06464080434	1286.75702079459	586.597185939273
FBgn0264503	302.308499072461	0.924200046788735	0.436964727234035	2.11504496630398	0.0344261150269235	0.241203662381901	599.24079198275	260.000995143241	483.402846387736	1046.94143067695	940.278602440686	558.862094405501
FBgn0031505	627.522226397114	-0.358506858318621	0.169619158457686	-2.11359885038019	0.0345495441330519	0.241873120397493	694.358378011758	977.178461300434	711.920555589211	568.838177334475	591.520720808141	701.697815804426
FBgn0032511	725.893177749734	-0.322460453618214	0.152587849341877	-2.11327740058602	0.0345770318617911	0.241873120397493	782.34214508859	866.992165960919	718.512412585408	658.40983307017	649.647034413565	585.210431362584
FBgn0034647	176.303049160714	-0.621253830228406	0.294179061214442	-2.11182205716383	0.0347017146671634	0.242551104837605	121.274922186985	241.636612586655	158.204567908714	104.694143067695	95.7374577030517	140.062212245547
FBgn0036814	431.898860232998	0.427125646268517	0.202352822846059	2.11079657926717	0.0347898002878522	0.242904953954117	501.745266303017	388.551673039342	558.110559011295	685.165002965247	646.227839495599	614.332277473045
FBgn0028693	1021.90852733265	-0.339156215525549	0.16072879056545	-2.11011489809874	0.0348484603460292	0.242904953954117	495.800417176204	602.158438565945	507.572988707123	393.184670632009	392.067683926783	486.750856417695
FBgn0037009	175.219226405068	-0.353890398478572	0.167721809699951	-2.10998437896461	0.0348597014128063	0.242904953954117	145.054318694237	163.346350108579	139.527639752824	107.02067958031	117.392358850171	127.58142105535
FBgn0027579	3647.64112334146	0.264910486164936	0.125553579539461	2.1099397335914	0.0348635472425847	0.242904953954117	5640.47285152017	4815.33441562687	5421.80237937154	6819.07851847586	7168.91201133566	5083.84227814037
FBgn0283536	1931.63014330893	-0.311791487412779	0.14779776501231	-2.10958188296562	0.034894386207485	0.242926097446053	1313.81165702567	1612.19947917816	1327.16054190088	1099.2885022108	1176.20305178035	1152.39305322822
FBgn0004921	2401.65888344558	0.336560022547486	0.159668375694237	2.10786901967359	0.0350423206534765	0.243761748048905	4514.51842690179	3240.83024801222	4066.07712382048	5097.44149914043	5286.07534317564	4540.23448407844
FBgn0037220	485.420192477488	-0.197367823236173	0.0936760248689178	-2.10691928390806	0.0351245767513804	0.24413956012475	306.754214943551	343.123989873051	347.171135133011	274.531308488622	306.58781097763	289.831706527915
FBgn0013678	22992.2058414426	-0.780538858704483	0.370608155425029	-2.10610275915091	0.0351954272237961	0.244437557753821	26246.5088948794	58894.5748589707	38332.7470757148	25446.4931067314	15985.875973131	30448.9702403513
FBgn0030433	232.738963620103	-0.337584929863812	0.160352698598254	-2.10526503647809	0.0352682437920609	0.244748725981919	156.944016947863	191.376197168631	153.809996577916	119.816630399695	126.510211964747	153.929758012433
FBgn0261090	136.605882043879	0.848465540883169	0.403126563806908	2.10471255694669	0.0353163367691177	0.244887963771255	250.872633151508	108.253202438822	207.643495380187	421.103108783395	392.067683926783	205.239677349911
FBgn0030400	509.608079990908	0.659262569358985	0.313341392090012	2.10397536361746	0.0353805961134545	0.24501182138181	820.389179500194	426.24698460286	628.423700304057	1113.24772128649	1062.22988784814	783.516335829053
FBgn0283494	1152.0608420814	-0.206835480945808	0.0983232887978186	-2.10362655149912	0.0354110359713485	0.24501182138181	1048.67138596981	1068.03382763302	901.985765646208	825.920461978481	900.387995064415	890.296438234074
FBgn0261243	852.221819210669	0.229875660857982	0.109281865898447	2.10351149267162	0.0354210817335591	0.24501182138181	791.853903691491	850.560876305027	769.04998288958	914.328849457868	936.85940752272	979.048731142144
FBgn0266186	671.215602021548	-0.308721783686942	0.146785165064415	-2.10322196763864	0.0354463708626082	0.24501182138181	639.665766045078	809.965925390469	650.396556958045	554.878958258783	512.87923769492	630.973332393308
FBgn0026179	940.039069906325	0.426602624446223	0.202883567037383	2.10269678651509	0.0354922831516434	0.245135239443406	1441.03142833947	979.111554201127	1287.6093999237	1949.63759757174	1648.05195045968	1382.59431295852
FBgn0000150	5832.85014254943	-0.271245578916389	0.129023180099356	-2.1023011423801	0.0355269045825306	0.245180541340893	4091.2451690727	4748.64271055295	3589.26613442894	3364.17179724193	3495.55693780071	3440.53810476439
FBgn0267243	20.2559833087153	0.652284342213685	0.310294259538739	2.10214762974773	0.0355403456912442	NA	30.9132154594276	41.5614973649047	23.0714994866874	48.8572667649242	53.5673870481361	48.5364101841006
FBgn0004456	463.557616106802	0.390269353275651	0.18569409011566	2.10167891198137	0.0355814120715499	0.245193741650627	485.09968874794	381.785847886915	497.685203212828	666.552710864324	607.476963758649	511.712438798089
FBgn0000181	4470.20364335093	-0.233221961018733	0.110971486683368	-2.10163860996275	0.0355849449940477	0.245193741650627	3420.6661875682	3761.79878474905	3202.54385731875	2660.39450217576	2982.67770010579	3195.08254469051
FBgn0037906	278.569448432356	-0.755170551191891	0.359455305737139	-2.10087468216182	0.0356519684245596	0.245198763030571	202.124870311642	400.150230443501	199.952995551291	150.061605063696	139.047259997289	187.211867852959
FBgn0027525	1027.10165089154	-0.270497022816476	0.128762478628303	-2.10074414299926	0.0356634320822865	0.245198763030571	1237.71758820247	1515.5448341435	1326.06189906818	1095.79869744187	1104.39995850306	1184.28840849205
FBgn0031106	236.155236894974	-0.324682722058779	0.154561442571395	-2.10067088309429	0.0356698669808694	0.245198763030571	328.155671800077	264.833727394974	241.701423193868	214.041359160621	217.68874311051	234.361523460371
FBgn0031003	178.235572826341	-0.476077875707254	0.226720842700214	-2.09984168211988	0.0357427702202837	0.245203456313378	70.1492196963934	75.3906231270365	72.5104269581604	58.163412815386	38.7508757369495	61.0172013742979
FBgn0038803	683.689524674548	0.221735427923219	0.105597220684013	2.09982257569767	0.0357444515511844	0.245203456313378	1095.04120915895	995.54284385702	1026.13240574124	1351.71771382957	1276.49943604069	999.850049792472
FBgn0025382	94.7120262281491	-0.383881208773922	0.18282620402252	-2.09970562385377	0.0357547445740235	0.245203456313378	105.818314457271	105.353563087782	97.7792121102466	59.3266810716937	80.9209463918651	98.4595749448898
FBgn0003545	290.49723049828	-2.71097049678422	1.29152339530055	-2.09904869447088	0.0358126084339577	0.245407654813716	1.1889698253626	0.966546450346621	6.5918569961964	0	1.13973163932204	0
FBgn0063499	114.485314608007	-1.48452757570632	0.707404865879025	-2.09855437432091	0.0358562019369701	0.245513821569991	7.1338189521756	6.76582515242635	6.5918569961964	3.48980476892316	2.27946327864409	1.38675457668859
FBgn0262109	5154.25405900626	0.402359997145664	0.191787408095206	2.09794793694655	0.0359097447302758	0.245687893272059	6873.43456042119	5798.31215562938	8127.75967631016	9781.92276729162	9648.96805850042	8057.0440905607
FBgn0261854	955.764985762049	0.383262009062186	0.182756430464846	2.09711914424761	0.0359830296848742	0.245985473632065	1029.64786876401	652.418853983969	966.805692775472	1291.22776450157	1181.90170997696	977.661976565455
FBgn0016917	4437.81328299693	0.347602128883606	0.165775887022052	2.09681959860283	0.036009547988487	0.245985473632065	6421.6260267834	4665.51971582314	6353.45150150063	8095.18379564543	7931.3924780421	6161.3505842274
FBgn0033593	270.329762622971	-0.673609220165029	0.321366277375241	-2.09607935738228	0.0360751518543322	0.246026065423889	353.124038132692	565.429673452773	414.188347927674	209.38828613539	258.719082126104	368.876717399165
FBgn0036501	391.801572110145	-0.383139962545002	0.18280735645632	-2.09586731066017	0.0360939632564747	0.246026065423889	526.713632635631	768.404428025564	633.916914467554	423.42964529601	455.892655728818	603.238240859536
FBgn0051810	21.3580764117816	0.787199218464425	0.375622689710015	2.09571796387527	0.0361072173477256	NA	13.0786680789886	8.69891805311959	19.7755709885892	24.4286333824621	20.5151695077968	26.3483369570832
FBgn0038975	791.661502369487	0.637266217340399	0.304099600675183	2.09558386767196	0.0361191215294881	0.246026065423889	1537.33798419384	819.631389893935	1356.82389838376	2302.10787923298	2147.25440848273	1324.3506207376
FBgn0032945	1492.24119287944	0.413002584893948	0.197103000858083	2.09536426688559	0.0361386234736538	0.246026065423889	2352.97128439258	1930.1932613422	2203.877522395	3343.23296862839	3139.96066633223	2150.856348444
FBgn0259685	997.117808734505	0.393139351743852	0.187641194675232	2.0951654695244	0.0361562856820732	0.246026065423889	1115.25369619012	888.256187868545	1084.36047587431	1593.67751114158	1357.42038243255	1101.08313389074
FBgn0034063	366.302227623605	-0.317415249669228	0.151628616893624	-2.09337298045733	0.036315872451057	0.246919671287848	416.13943887691	480.373585822271	382.327705779391	402.490816682471	283.793178191189	341.141625865393
FBgn0032689	830.964218370661	0.15662461122207	0.0748330097225613	2.09298826550938	0.0363502020791156	0.246960898573276	716.948804693647	749.073499018632	739.386626406696	829.410266747405	768.179124903058	865.334855853679
FBgn0029629	1322.41177251957	-0.31691523521408	0.15147733259311	-2.09216276646064	0.0364239579582603	0.247182017053761	1041.53756701764	1421.78982845988	1148.08176017087	948.063628890792	963.073235227127	990.142767755652
FBgn0043010	356.614833977279	-0.273898099303869	0.130927004342405	-2.09199088209153	0.0364393313454554	0.247182017053761	284.163788261661	307.361771210226	235.109566197672	231.490383005236	225.666864585765	227.427750576929
FBgn0030658	395.742056777342	-0.261846273381091	0.125192544534006	-2.09154845726429	0.0364789273836417	0.247258641234195	259.195421929047	239.703519685962	246.095994524666	202.408676597543	204.011963438646	214.946959386731
FBgn0010411	12315.465504458	-0.327373935730058	0.156554363263146	-2.09111984429197	0.0365173222498198	0.247327011237733	11379.6301985454	14143.4742079221	10348.1168411957	8851.30816224544	9659.22564325432	10080.3190179494
FBgn0003139	338.827342654017	-0.226238808724559	0.1082427537616	-2.09010581182034	0.03660829572662	0.247677282452628	259.195421929047	273.532645448094	247.194637357365	219.857700442159	209.710621635256	239.908541767126
FBgn0034606	270.107739151118	0.351800168882177	0.168341126670624	2.089805241535	0.036635298328561	0.247677282452628	477.965869795765	355.689093727557	459.232704068349	611.879102817861	577.843941136276	456.242255730546
FBgn0030158	790.811385534321	-0.405889894814155	0.194346559174065	-2.08848510896775	0.0367540972763985	0.247677282452628	1338.78002335829	1916.66161103735	1533.70539444836	972.492262273254	1260.54319309018	1383.98106753521
FBgn0014163	972.118311295628	0.243586091048055	0.116635468368692	2.08843925827145	0.0367582292777837	0.247677282452628	1073.63975230243	1035.17124832123	1089.85369003781	1258.65625332495	1275.35970440137	1252.2393827498
FBgn0065032	101.819067997513	-0.700801518742369	0.335562359172772	-2.08843900272362	0.0367582523085105	0.247677282452628	26.1573361579772	49.2938689676777	34.0579278136814	22.1020968698467	12.5370480325425	34.6688644172147
FBgn0029167	3031.01237659161	0.540031156913232	0.258599518471087	2.08829142492627	0.0367715545092894	0.247677282452628	5162.50698172441	4304.0313433935	4405.5577591246	6510.81243055431	7203.10396051532	6455.34255448538
FBgn0034335	714.282097763732	-0.439681820591849	0.210581398294671	-2.08794235460719	0.0368030349360808	0.247677282452628	668.201041853781	1083.49857083856	974.496192604368	550.225885233552	594.939915726107	868.108365007056
FBgn0083975	246.501208377205	0.827175614273565	0.396221135394686	2.08766151116496	0.036828379076899	0.247677282452628	455.375443113876	256.134809341855	410.892419429576	754.96109834371	745.384492116617	489.524365571072
FBgn0037891	1262.70001594875	-0.202596088826294	0.0970566079206362	-2.08740129257307	0.036851875236716	0.247677282452628	1543.28283332065	1704.02139196109	1476.57596714799	1295.8808375268	1448.59891357832	1361.79299430819
FBgn0038313	193.832132735451	-0.411396055453746	0.197085947894472	-2.08739415391515	0.036852519994096	0.247677282452628	122.463892012348	125.651038545061	92.2859979467496	62.8164858406169	94.5977260637297	99.8463295215784
FBgn0265296	391.71769530976	0.620695796761257	0.297481396339553	2.08650290202611	0.0369330926045006	0.248028001603015	808.499481246567	443.644820709099	655.889771121542	1141.16615943787	1095.28210538848	694.764042920983
FBgn0284247	122.575524739072	0.397559449498545	0.190569094778559	2.08616958568497	0.0369632642084083	0.248039968808651	193.802081534104	207.807486824524	181.276067395401	279.184381513853	239.343644257629	249.615823803946
FBgn0026076	429.700169664339	0.321497800617185	0.154138141151281	2.08577707124188	0.0369988213007479	0.248074244697362	403.060770797921	332.491978919238	397.708705437183	523.470715338474	492.364068187123	396.611808932936
FBgn0263706	709.563390980369	0.492024917226328	0.235928119818417	2.08548653549656	0.0370251591032803	0.248074244697362	935.719252560366	744.240766766898	1037.11883406823	1447.1057108468	1221.79231735323	1151.00629865153
FBgn0260866	640.280465719792	0.458652715286667	0.220071416801763	2.08410852237033	0.0371502970272656	0.248645469277208	1112.87575653939	691.080711997834	919.564050969398	1497.12624586804	1326.64762817086	915.258020614468
FBgn0033915	707.293445133832	0.307346237931459	0.147484575069878	2.08392123573492	0.0371673323653466	0.248645469277208	653.93340394943	530.634001240295	644.903342794548	794.512219058173	828.584901787126	636.520350700062
FBgn0030545	114.267384495998	-0.405687852985824	0.194839255687379	-2.0821669203908	0.0373272256628942	0.249196301551797	86.7947972514697	121.784852743674	101.075140608345	80.2655096852327	83.2004096705092	70.724483411118
FBgn0035039	163.877891760126	-0.337062619965376	0.161891522444685	-2.08202761253631	0.0373399476326527	0.249196301551797	110.574193758722	91.821912782929	94.4832836121484	80.2655096852327	80.9209463918651	72.1112379878066
FBgn0041605	3949.15840747492	0.479496884529079	0.230355612936948	2.08155068772005	0.0373835296451014	0.249196301551797	8030.302200499	5526.71260308198	7380.68255007457	10934.7216092926	10571.010954712	7684.00710943147
FBgn0039182	770.402541779678	0.380557902110925	0.182836653501711	2.08140925149543	0.0373964625925921	0.249196301551797	278.218939134848	243.569705487349	305.422707490433	435.062327859087	330.522175403393	309.246270601555
FBgn0040650	44.5534209663494	-0.594411878817674	0.28564199076826	-2.0809681280366	0.0374368234436291	0.249196301551797	47.558793014504	74.4240766766898	36.2552134790802	43.0409254833856	34.1919491796613	27.7350915337718
FBgn0003278	276.650122877656	0.403328473464989	0.193858247913389	2.0805329554262	0.0374766761382911	0.249196301551797	101.062435155821	74.4240766766898	97.7792121102466	140.755459013234	113.973163932204	104.006593251644
FBgn0034729	92.4704547737299	-0.539908611599421	0.259509585823987	-2.08049583172475	0.0374800775623859	0.249196301551797	42.8029137130536	48.3273225173311	38.452499144479	24.4286333824621	28.4932909830511	37.4423735705919
FBgn0000318	535.166646209819	-0.33843303788145	0.162721234943995	-2.07983326821439	0.0375408285202066	0.249196301551797	487.477628398666	569.29585925416	552.617344847798	385.041792837855	418.28151163119	471.49655607412
FBgn0030571	99.8080173561496	-0.346733417631384	0.166720182462638	-2.07973271447857	0.0375500556890996	0.249196301551797	137.920499742062	130.483770796794	114.258854600738	101.204338298772	93.4579944244076	106.780102405021
FBgn0005411	971.658173858905	-0.249482257581579	0.120009755406107	-2.07884981297848	0.0376311567723934	0.249196301551797	676.523830631319	764.538242224177	696.53955593142	583.960664666476	564.167161464412	653.161405620325
FBgn0261794	909.601100300653	0.413992789337366	0.199195149479427	2.07832766219101	0.037679190312837	0.249196301551797	1437.46451886338	1002.30866900945	1356.82389838376	1842.61691799143	1780.26082062103	1432.51747771931
FBgn0053196	2286.74524733047	0.521421985032599	0.250931341732168	2.07794682574622	0.037714256995549	0.249196301551797	3949.75775985455	2801.05161310451	4057.28798115889	6287.46492534323	4839.3005405614	4384.91797148932
FBgn0027356	1137.88160656762	0.243080406760747	0.116987489025141	2.0778324997514	0.0377247893289291	0.249196301551797	1606.29823406487	1441.12075746681	1623.79410672971	1793.7596512265	1921.58754389697	1811.1014771553
FBgn0028370	184.757770308677	0.698860715817173	0.336345945646753	2.07780330003189	0.0377274797672852	0.249196301551797	388.79313289357	202.97475457279	296.633564828838	608.389298048938	515.158700973564	316.180043484998
FBgn0085399	234.532690324103	0.789266269757359	0.379880335181309	2.07767077329933	0.0377396927242358	0.249196301551797	443.48574486025	222.305683579723	380.130420113993	780.55299998248	651.926497692209	373.03698112923
FBgn0004842	22.2497329452955	0.654304657298286	0.314935764025431	2.07758131034445	0.0377479390545519	NA	26.1573361579772	16.4312896558926	17.5782853231904	34.8980476892316	31.9124859010172	26.3483369570832
FBgn0032595	122.06003540291	-0.391150103192568	0.188282286556802	-2.07746628929198	0.0377585434783805	0.249196301551797	115.330073060172	132.416863697487	110.962926102639	91.8981922483099	95.7374577030517	85.9787837546925
FBgn0000279	144.768782373736	-1.55702069709467	0.749622545066769	-2.07707293135905	0.03779482846703	0.249196301551797	63.0154007442178	281.265017050867	141.724925418223	25.5919016387698	51.287923769492	88.7522929080697
FBgn0035902	65.811307449593	-0.55459093400834	0.267031038606593	-2.07687816705607	0.0378128053213875	0.249196301551797	32.1021852847902	30.9294864110919	45.0443561406754	20.938828613539	22.7946327864409	30.5086006871489
FBgn0039067	165.394467017551	-0.372347196008283	0.179289478378873	-2.07679334769128	0.0378206364695996	0.249196301551797	95.1175860290079	91.821912782929	97.7792121102466	83.7553144541559	62.6852401627124	73.4979925644952
FBgn0033571	236.397157932464	-0.374904219032433	0.180524995536196	-2.07674409806183	0.0378251841910493	0.249196301551797	148.621228170325	116.952120491941	110.962926102639	100.041070042464	91.1785311457635	98.4595749448898
FBgn0261596	7042.17963044476	-0.279410913443253	0.134559222019849	-2.07649025647634	0.0378486313562132	0.249196301551797	6569.05828512836	7169.84156867124	5892.02151176688	5470.85060941521	5537.95603546581	5165.66079816499
FBgn0267978	620.522544988939	0.484932270997485	0.233690775682561	2.07510232092431	0.0379770526869374	0.249598253854109	979.711136098782	767.437881575217	1050.30254806063	1426.16688223326	1359.6998457112	1127.43147084782
FBgn0014859	232.412340549391	0.916255368339211	0.44158474910891	2.07492530072235	0.0379934584282811	0.249598253854109	543.359210190708	190.409650718284	313.113207319329	1002.73723693725	672.441667200006	298.152233988047
FBgn0001134	42.8268903704928	0.629886267006912	0.30358231151063	2.07484508525081	0.0380008945599336	0.249598253854109	91.5506765529202	57.9927870207973	64.8199271292646	129.122776450157	117.392358850171	83.2052746013153
FBgn0035247	206.312735424586	-0.328492519672075	0.158355989877205	-2.07439276485089	0.0380428487206829	0.249598253854109	165.266805725401	187.510011367245	158.204567908714	122.143166912311	135.628065079323	151.156248859056
FBgn0035424	909.487500822049	0.57151798257054	0.275524821869344	2.07428854755438	0.0380525207890206	0.249598253854109	1043.91550666836	640.82029657981	861.33598083633	1415.6974679265	1369.9574304651	995.689786062407
FBgn0036770	416.120002877345	0.371033502884815	0.178899827935934	2.07397350330423	0.0380817717378366	0.249602730437718	268.707180531947	208.77403327487	323.000992813624	353.633549917547	352.177076550512	327.274080098507
FBgn0038983	112.304244247703	0.460884497769044	0.222325946670259	2.07301264054708	0.0381711031870615	0.250000696060986	155.755047122501	131.450317247141	160.401853574112	251.265943362468	185.776257209493	177.504585816139
FBgn0034290	621.036923827395	-0.409855597370521	0.197801498303931	-2.07205506977889	0.0382603057802269	0.250316202897504	1338.78002335829	1592.86855017123	1000.86362058915	909.675776432637	1062.22988784814	988.756013178964
FBgn0085224	133.71459769982	-0.506134129502311	0.244323102755547	-2.07157703792225	0.0383049031629584	0.250316202897504	51.1257024905918	72.4909837759966	59.3267129657676	43.0409254833856	41.0303390155936	45.7629010307234
FBgn0027491	271.167304787144	0.210462325983747	0.101604657001473	2.07138464116556	0.0383228650459156	0.250316202897504	512.44599473128	486.17286452435	500.981131710927	595.593347229553	615.455085233904	520.032966258221
FBgn0037796	226.952796872925	0.331936479857641	0.160266491453714	2.07115334494926	0.0383444680038044	0.250316202897504	398.304891496471	330.558886018544	358.157563460005	495.552277187089	450.193997532207	420.186636736642
FBgn0030897	137.776476013046	0.863319394621682	0.416869162508212	2.07096008116138	0.038362526688767	0.250316202897504	269.89615035731	140.14923530026	192.262495722395	466.470570779396	419.421243270512	208.013186503288
FBgn0034360	40.8120065571098	-0.635111219891442	0.306732085358049	-2.07057314904006	0.0383987035875982	0.250365278540929	33.2911551101528	25.1302077090122	21.972856653988	15.1224873320004	13.6767796718645	23.574827803706
FBgn0036816	1781.87945509807	0.287407735281134	0.138921084865996	2.06885611034761	0.0385595912097338	0.251024002770955	2229.31842255487	1765.88036478328	2169.81959458132	2753.45596268037	2532.48370257358	2234.06162304532
FBgn0052109	145.814736415534	-0.403580669957966	0.195132546910474	-2.06823862214604	0.0386175901394842	0.251024002770955	140.298439392787	174.944907512738	163.697782072211	102.367606555079	125.370480325425	135.901948515482
FBgn0030685	878.00842442657	0.284290568769713	0.13745723650341	2.06821100148234	0.038620186202022	0.251024002770955	806.121541595842	715.2443732565	872.322409163324	1009.7168464751	1010.94196407865	891.683192810763
FBgn0023215	618.585176832402	0.504929607413733	0.244150367753058	2.06810914134865	0.0386297613045438	0.251024002770955	852.491364784984	465.875389067071	638.311485798352	1027.16587031972	1036.01606014374	710.018343264557
FBgn0039415	28.2081469742743	0.685615816234968	0.331526009117591	2.06806041571171	0.0386343423472603	NA	43.9918835384162	26.0967541593588	46.1429989733748	74.4491684036941	74.0825565559329	36.0556189939033
FBgn0058160	835.317380039422	0.229677809276512	0.111064692383166	2.06796421390282	0.0386433883171495	0.251024002770955	693.169408186395	745.207313217245	736.090697908598	861.981777924021	915.204506375601	771.035544638855
FBgn0031886	111.012365475593	-1.13739616405617	0.550401163453813	-2.0664857554423	0.0387826360531381	0.251741375331551	5.944849126813	12.5651038545061	7.6904998288958	2.32653651261544	3.41919491796613	6.93377288344294
FBgn0029148	380.288071013782	-0.336293187002504	0.162816193772713	-2.06547751307809	0.0388778410653457	0.251925500614038	155.755047122501	175.911453963085	134.034425589327	117.49009388708	141.326723275933	109.553611558399
FBgn0011284	14226.4807306427	-0.297388113713843	0.143996676733456	-2.0652428962949	0.0389000236108388	0.251925500614038	12482.9941964819	14370.6126237536	10618.3829780397	10042.4948567045	10443.3610111079	10006.8210253849
FBgn0038460	136.590578448007	-0.334899431983121	0.162179819481579	-2.06498831392003	0.0389241060252559	0.251925500614038	184.290322931203	219.406044228683	186.769281558898	140.755459013234	166.400819341018	162.250285472565
FBgn0037363	939.435449703512	0.334226147549168	0.161855621778125	2.06496471285583	0.0389263392273036	0.251925500614038	1085.52945055605	993.609750956327	1223.88811562713	1523.88141576311	1452.01810849628	1185.67516306874
FBgn0051072	658.493099640575	0.304911188009622	0.147803220885175	2.06295360942439	0.0391170359465248	0.252972274659354	620.642248839277	521.935083187175	614.141343478965	784.042804751403	776.157246378312	606.011750012913
FBgn0262567	33.6159200747058	-0.802725619861358	0.38915489727276	-2.06274063486531	0.0391372769869294	NA	23.779396507252	32.8625793117851	17.5782853231904	15.1224873320004	11.3973163932204	16.6410549202631
FBgn0013467	878.179453625339	0.425213258653176	0.206184962945085	2.06229034639362	0.0391801015578965	0.253027704965869	1838.14735001058	1323.20209052452	1543.59317994266	2254.41388072436	2284.02220520138	1776.43261273808
FBgn0011592	319.702431452289	0.463614678081191	0.2248096513073	2.06225433554656	0.0391835280781528	0.253027704965869	330.533611450803	240.670066136309	320.803707148225	407.143889707702	461.591313925428	359.169435362344
FBgn0014343	32.7098334745403	0.524256289109343	0.254469075555757	2.06019646184659	0.0393797630334281	NA	41.613943887691	28.9963935103986	39.5511419771784	54.6736080464629	52.427655408814	49.9231647607892
FBgn0029504	801.120665178628	0.555187757185824	0.269529568401495	2.05983989244107	0.039413849489619	0.254327033228066	1114.06472636476	804.166646688389	1184.33697364995	1758.86160353727	1569.41046734645	1228.66455494609
FBgn0035959	1205.15427159489	0.287281393403779	0.139490857125833	2.05949980753667	0.0394463834351704	0.254339926314819	953.553799940805	885.356548517505	999.764977756454	1212.12552307264	1221.79231735323	1027.58514132624
FBgn0036273	182.947398421947	0.358595811908345	0.174142369533261	2.05921059228412	0.039474068911857	0.254339926314819	186.668262581928	148.84815335338	196.657067053193	257.082284644006	226.806596225087	195.532395313091
FBgn0027785	564.427490397077	-0.295862068993287	0.143781471197092	-2.05772041786753	0.0396169792288035	0.254931789991501	651.555464298704	752.939684820018	549.3214163497	522.307447082166	508.320311137632	563.022358135567
FBgn0039052	48.510762401242	-0.629569941192776	0.305966351891735	-2.05764436938983	0.0396242841717361	0.254931789991501	34.4801249355154	60.8924263718371	64.8199271292646	22.1020968698467	30.7727542616952	52.6966739141664
FBgn0002593	11116.5328653567	-0.307090634749731	0.149280388474178	-2.05713984193476	0.0396727762185889	0.255055957190442	11737.5101159796	14171.5040549822	10942.482613686	9417.8198030673	10219.9736098008	10149.6567467838
FBgn0053493	204.801356359566	-0.400125894702094	0.194591685336477	-2.05623325585684	0.0397600382074498	0.255429010160654	348.368158831242	380.819301436569	390.018205608287	264.061894181852	223.387401307121	363.32969909241
FBgn0086608	42.0387046371764	-0.93887132722004	0.456678595584591	-2.05586891152233	0.0397951534406362	0.255466756510535	5.944849126813	18.3643825565858	19.7755709885892	1.16326825630772	7.97812147525431	15.2543003435745
FBgn0262962	47.7654187137328	-0.744877296875651	0.362408801834379	-2.05535100997922	0.0398451136902249	0.255599675705944	26.1573361579772	58.9593334711439	37.3538563117796	19.7755603572312	23.9343644257629	30.5086006871489
FBgn0033936	412.162320236475	0.440709435060827	0.21451395714543	2.05445576094635	0.0399316009157959	0.255966542334049	570.705516174048	774.203706727644	838.264481349642	896.879825613252	976.750014898992	1091.37585185392
FBgn0034032	238.717774319366	0.28276015662449	0.137672479086713	2.05386115293525	0.0399891321264906	0.25614739544659	194.991051359466	191.376197168631	187.867924391597	223.347505211082	258.719082126104	214.946959386731
FBgn0034279	46.4523891084644	-1.56671018347677	0.763177627276961	-2.05287750515806	0.0400844592001666	0.256556400978948	0	9.66546450346621	7.6904998288958	1.16326825630772	0	5.54701830675435
FBgn0034381	102.171561169947	-0.303413995502736	0.147819590946518	-2.05259663864524	0.0401117138305189	0.256556400978948	198.557960835554	205.87439392383	203.248924049389	141.918727269542	165.261087701696	187.211867852959
FBgn0034065	73.4119059853938	-0.500609024567645	0.243930434147585	-2.05226144214855	0.0401442610875787	0.256576744054261	39.2360042369658	51.2269618683709	50.5375703041724	40.7143889707702	25.074096065085	34.6688644172147
FBgn0031969	978.956011265218	0.19195317994704	0.0935662992020639	2.05152048957821	0.0402162863603767	0.256849191469745	468.454111192864	532.567094140988	525.151274030313	606.062761536322	547.071186874581	593.530958822716
FBgn0035903	56.4537474363006	0.528031924263346	0.257508731037227	2.0505398870806	0.0403117755969743	0.256942096777064	95.1175860290079	66.6917050739169	109.86428326994	155.877946345235	131.069138522035	102.619838674956
FBgn0027546	43.6852485291358	0.451194029749609	0.220051214550296	2.05040463272009	0.0403249614902002	0.256942096777064	86.7947972514697	65.7251586235703	70.3131412927616	101.204338298772	113.973163932204	87.3655383313811
FBgn0036560	308.266506165909	-0.311035826390962	0.151701551124739	-2.05031408106835	0.0403337913781745	0.256942096777064	588.540063554487	732.642209362739	646.001985627247	428.082718321241	557.328771628479	603.238240859536
FBgn0000592	2957.24911877553	0.305326257859678	0.148948949799303	2.04987184045998	0.0403769387797091	0.256942096777064	4597.74631467717	4833.69879818345	4790.08275056939	5921.0354246063	6515.84578200412	5135.15219747784
FBgn0037553	246.733293582491	0.400356469842075	0.195335080689135	2.04958816629165	0.0404046361756555	0.256942096777064	362.635796735593	400.150230443501	376.834491615894	561.858567796629	560.747966546446	379.970754012673
FBgn0036116	846.775241958076	-0.186718718607974	0.0911140911540088	-2.04928476202837	0.0404342778078976	0.256942096777064	1483.83434205252	1589.00236436985	1499.64746663468	1209.79898656003	1381.35474685832	1429.74396856593
FBgn0028996	878.13853101895	0.668235290753908	0.326086135170537	2.04926005334276	0.040436692579657	0.256942096777064	1916.61935848451	839.928865351214	1663.34524870689	2578.96572423422	2459.54087765697	1983.05904466468
FBgn0035084	18.4465709406814	0.944493012564114	0.461047819784024	2.04857928404598	0.040503272050354	NA	5.944849126813	13.5316503048527	2.1972856653988	11.6326825630772	10.2575847538984	22.1880732270174
FBgn0033052	749.281432221942	0.27920442210684	0.136321583280942	2.04813071699317	0.0405471928386276	0.257456994063291	996.356713653858	833.163040198787	1061.28897638762	1237.71742471141	1170.50439358374	1096.92287016067
FBgn0033602	53.6253307108148	0.386018920230408	0.188638793699464	2.04633899878202	0.0407230292576485	0.258385698347186	91.5506765529202	87.9557269815425	101.075140608345	116.326825630772	125.370480325425	124.807911901973
FBgn0086445	107.446366347978	-0.44688606488379	0.218433781445912	-2.04586516758373	0.0407696382245905	0.258475783901791	55.8815817920422	71.52443732565	58.2280701330682	45.3674619960011	42.1700706549156	49.9231647607892
FBgn0035400	706.233501793871	0.363861362711409	0.177881024143362	2.04553220032147	0.0408024179856124	0.258475783901791	1140.22206252273	831.229947298094	1018.44190591234	1397.08517582557	1346.02306603933	1101.08313389074
FBgn0032031	71.1277395177039	-0.435435221321863	0.212896254502809	-2.04529301062043	0.0408259793732943	0.258475783901791	57.0705516174048	60.8924263718371	63.7212842965652	36.0613159455393	47.8687288515258	51.3099193374778
FBgn0030013	241.518217091262	-0.437634647911227	0.214200613446388	-2.04310641725012	0.0410419048036876	0.259317235599366	367.391676037043	245.502798388042	255.98378001896	252.429211618775	188.055720488137	199.692659043157
FBgn0036143	50.374081142441	0.459408340345138	0.22486511279824	2.04303964553782	0.0410485136854397	0.259317235599366	109.385223933359	87.9557269815425	104.371069106443	167.510628908312	135.628065079323	109.553611558399
FBgn0034219	15.5006585942074	0.943627590532832	0.461900601002896	2.04292349584303	0.0410600120134177	NA	13.0786680789886	5.79927870207973	3.2959284980982	16.2857555883081	9.11785311457635	16.6410549202631
FBgn0262517	1047.3706872571	0.243544534372868	0.119246180592223	2.04236758916161	0.0411150822127589	0.259317235599366	999.923623129946	847.661236953987	1014.04733458155	1231.90108342988	1128.33432292882	1023.42487759618
FBgn0037654	12.579231671393	-0.796585635253933	0.390035285552198	-2.04234248736279	0.0411175703668479	NA	19.0235172058016	18.3643825565858	19.7755709885892	12.7959508193849	11.3973163932204	8.32052746013153
FBgn0265959	467.512394555638	0.379978554532305	0.186085809198073	2.0419534201442	0.0411561520124932	0.259317235599366	814.44433037338	728.776023561352	908.577622642404	1223.75820563572	1070.2080093234	894.45670196414
FBgn0086604	437.024710835929	0.539533094694291	0.264253673211076	2.04172410600072	0.0411789061900221	0.259317235599366	902.428097450213	514.202711584403	793.220125208967	1222.59493737941	1147.7097607973	838.986518896596
FBgn0051636	48.8541503671736	-0.470473529596375	0.230449232208482	-2.0415495642474	0.0411962326039746	0.259317235599366	77.2830386485689	87.9557269815425	74.7077126235592	53.5103397901551	71.8030932772888	47.149655607412
FBgn0031558	366.284563449814	-0.334674473111433	0.163941348092903	-2.04142809001289	0.0412082947547182	0.259317235599366	744.295110676987	756.805870621404	796.516053707065	545.572812208321	613.17562195526	664.255442233834
FBgn0013325	9745.07129858607	-0.328005553970333	0.160744827067228	-2.0405356735564	0.0412970016953469	0.259317235599366	9012.3912762485	10950.9712824272	7614.69347343954	7090.12002219556	7507.4123082143	7373.37408425323
FBgn0024277	1425.88752571434	0.511671226576989	0.250777898093511	2.04033621171112	0.0413168504685321	0.259317235599366	2052.16191857585	1344.46611243215	1964.37338486653	2937.25234717699	2702.30371683257	2001.08685416163
FBgn0037538	240.999716202159	-0.301544671139587	0.14779245790877	-2.04032516548122	0.0413179499329535	0.259317235599366	187.857232407291	209.740579725217	187.867924391597	147.73506855108	158.422697865764	170.570812932696
FBgn0285950	13514.9955310434	-0.312125695450434	0.152981702718654	-2.04028122254894	0.0413223239502841	0.259317235599366	12499.639774037	14915.7448217491	11236.9188928495	9815.65754672454	10499.2078614347	10819.4592073244
FBgn0037270	1543.144376761	-0.283115673857873	0.138779674022757	-2.04003702884796	0.04134663779168	0.259317235599366	1684.7702425388	2024.91481347617	1653.4574632126	1342.41156777911	1449.73864521764	1618.34259099558
FBgn0011327	455.082039156693	-0.334424849769486	0.163949394439861	-2.03980533695815	0.0413697180553565	0.259317235599366	123.65286183771	131.450317247141	108.765640437241	82.5920461978481	95.7374577030517	112.327120711776
FBgn0039929	957.507167633319	-0.283704167424211	0.139116729674747	-2.03932458797376	0.0414176432491039	0.259317235599366	492.233507700116	603.124985016292	526.249916863013	460.654229497857	471.848898679326	399.385318086314
FBgn0264467	14.4828848260088	0.770098500678959	0.377685662073233	2.03899321052234	0.041450705170723	NA	14.2676379043512	14.4981967551993	17.5782853231904	18.6122921009235	36.4714124583054	23.574827803706
FBgn0033669	592.536726437689	-0.303416275157386	0.148810282555157	-2.03894697293464	0.0414553201260323	0.259317235599366	576.650365300861	729.742570011699	573.491558669087	495.552277187089	501.481921301699	528.353493718352
FBgn0011826	475.0036380584	0.431608037106295	0.211696696628175	2.0388038357744	0.041469609347733	0.259317235599366	615.886369537826	384.685487237955	532.841773859209	767.757049163095	747.663955395261	549.154812368681
FBgn0003444	446.29181492205	0.347374333057139	0.170388612593104	2.03871800920572	0.0414781793175925	0.259317235599366	204.502809962367	218.439497778336	216.432638041782	276.857845001237	299.749421141698	235.74827803706
FBgn0259162	14.1834754209384	0.761874978779271	0.373823099237573	2.03806287073524	0.0415436457500369	NA	33.2911551101528	18.3643825565858	25.2687851520862	48.8572667649242	46.7289972122038	33.2821098405261
FBgn0028969	991.685048769138	-0.165409566723321	0.0811614481116515	-2.03803123985382	0.0415468087617612	0.259317235599366	1067.69490317561	1087.36475663995	1057.99304788952	973.655530529562	914.064774736279	979.048731142144
FBgn0042696	404.999128405651	0.616796018360235	0.30267975413869	2.03778419245581	0.0415715199211469	0.259317235599366	842.979606182083	443.644820709099	681.158556273628	1076.02313708464	960.793771948483	979.048731142144
FBgn0030237	894.87075814018	-0.436130875598583	0.214029454630365	-2.03771427793335	0.0415785154489766	0.259317235599366	1523.07034628949	1964.02238710433	1537.00132294646	1032.98221160126	1246.86641341832	1435.29098687269
FBgn0038828	122.13632250144	-0.382802003660587	0.187861897293931	-2.03767772589697	0.0415821731801204	0.259317235599366	109.385223933359	101.487377286395	103.272426273744	91.8981922483099	80.9209463918651	66.5642196810523
FBgn0024733	15578.1845138386	-0.312851202130696	0.153625246184413	-2.03645696199664	0.0417044905733874	0.259767769816203	12298.7038735507	16526.0112080265	11808.2131658532	10211.1687538692	10805.7956724123	11697.2748543682
FBgn0026372	3684.99604027146	-0.460964502746042	0.226391478155643	-2.0361389328848	0.041736406237284	0.259767769816203	4161.3943887691	4073.02674176066	3825.47434345931	2460.31236209083	2636.19928175189	3666.57910076463
FBgn0052633	74.5680294868332	-1.04349968313373	0.512628854745869	-2.03558514795472	0.0417920304152502	0.259767769816203	10.7007284282634	13.5316503048527	27.466070817485	4.65307302523088	2.27946327864409	19.4145640736402
FBgn0032170	946.233848269005	-0.233791681814636	0.11486212043549	-2.03541150840881	0.0418094843219738	0.259767769816203	925.018524132102	1155.02300816421	932.747764961791	803.818365108635	934.579944244076	825.11897312971
FBgn0020249	532.36914901298	-0.226054733420777	0.11108654777982	-2.03494246548044	0.0418566624449101	0.259767769816203	548.115089492158	664.017411388129	565.801058840191	471.123643804627	510.599774416276	542.221039485238
FBgn0036927	1756.81173641038	-0.181917328897014	0.0894037271737461	-2.03478461858171	0.0418725494168917	0.259767769816203	1477.88949292571	1673.09190555	1543.59317994266	1233.06435168618	1407.56857456272	1503.24196113043
FBgn0024150	111.92320368611	0.397154809202176	0.195193992663279	2.03466717281249	0.0418843734078829	0.259767769816203	211.636628914543	136.283049498874	179.078781730002	271.041503719699	227.946327864409	191.372131583025
FBgn0085369	87.1778206007921	0.758743061657596	0.372922081203827	2.03458872483041	0.041892272824886	0.259767769816203	190.235172058016	84.089541180156	145.020853916321	286.163991051699	250.74096065085	170.570812932696
FBgn0024944	221.12874419695	0.529749875469841	0.260424443940276	2.03417877160306	0.0419335740897346	0.259839458739015	319.832883022539	201.041661672097	286.745779334543	471.123643804627	395.486878844749	296.765479411358
FBgn0037635	419.201341527358	0.348026338118848	0.171175097638456	2.03315986332268	0.0420363746040774	0.260291853235878	500.556296477654	661.117772037089	691.046341767923	680.511929940016	828.584901787126	851.467310086793
FBgn0032208	3646.11963281284	0.350097079768818	0.172239768832873	2.03261466350738	0.042091468874976	0.260448416119451	3405.20957983848	3264.99390927089	4014.44091068361	4879.91033521089	4451.7917831919	4286.45839654443
FBgn0261797	3463.81686660643	0.4900563727453	0.241248806131528	2.03133180471833	0.0422213471343439	0.261067169081927	3930.73424264875	2569.08046502132	4085.85269480907	5829.13723235799	5075.22498990106	3960.57107102261
FBgn0264442	204.753336388534	0.57598934892907	0.283625963937755	2.03080613965045	0.0422746639810919	0.261211979634229	430.407076781261	247.435891288735	337.283349638716	573.491250359706	571.005551300344	366.103208245787
FBgn0036202	253.785044406948	0.715696356828532	0.352513238938366	2.03026802336257	0.0423293027099276	0.261364747545327	483.910718922578	259.034448692895	408.695133764177	772.410122188326	669.02247228204	447.921728270414
FBgn0000927	728.766810715243	-2.28173042993482	1.12405596496391	-2.02990820835872	0.0423658705733557	0.261405798869639	0	0.966546450346621	10.986428326994	1.16326825630772	1.13973163932204	0
FBgn0033129	49.7678485084201	-0.486452519483034	0.239724857349322	-2.02921184253407	0.0424367178760184	0.261492122535936	84.4168576007445	86.0226340808493	69.2144984600622	51.1838032775397	59.2660452447463	61.0172013742979
FBgn0032290	132.974697059692	-0.373245322452508	0.183938777377809	-2.02918236042128	0.0424397195554489	0.261492122535936	102.251404981184	134.34995659818	102.173783441044	66.3062906095401	102.575847538984	94.299311214824
FBgn0037515	388.50239780618	-0.277253920417124	0.136664650078099	-2.0287171573533	0.0424871073231025	0.261599617112013	533.847451587807	628.255192725304	557.011916178596	468.797107292011	498.062726383733	452.08199200048
FBgn0035016	493.601823905688	0.492853735976642	0.243004060926781	2.02817078075557	0.0425428209461357	0.261758187750977	430.407076781261	301.562492508146	457.035418402951	609.552566305245	632.551059823734	428.507164196774
FBgn0039804	32.6436388546344	0.47075671505408	0.232126381094663	2.02801901633964	0.0425583072128829	NA	59.44849126813	48.3273225173311	49.438927471473	75.6124366600018	70.6633616379667	70.724483411118
FBgn0287186	710.408976360335	0.367007010751782	0.181000648394241	2.0276557791793	0.0425953918341955	0.261897212143115	1584.89677720834	1132.79243980624	1277.7216144294	1713.49414154127	1670.84658324612	1766.72533070126
FBgn0026741	133.869890222298	-0.383450682808942	0.189157298223126	-2.02715246205638	0.0426468230541681	0.26190049586447	97.4955256797331	78.2902624780763	74.7077126235592	81.4287779415404	53.5673870481361	55.4701830675435
FBgn0285917	991.171703065895	0.639879794058882	0.315668289199009	2.02706390205536	0.0426558779461074	0.26190049586447	1382.7719068967	813.832111191855	1264.53790043701	2119.47476299267	1840.6665975051	1431.13072314262
FBgn0001105	1882.46367289988	0.416365558392968	0.205452579089795	2.02657742354741	0.0427056473493346	0.262021938828045	2056.9177978773	1546.47432055459	1854.50910159659	2487.06753198591	2581.49216306443	2213.26030439499
FBgn0030086	2566.39037438915	-0.203094722068327	0.100248838324615	-2.02590599015908	0.0427744192878371	0.262259720223041	840.601666531358	760.672056422791	778.937768383875	675.858856914785	616.594816873226	777.969317522298
FBgn0052039	202.018316003233	-0.386152479617409	0.19064057683487	-2.02555240877124	0.0428106726802931	0.262292123755928	192.613111708741	271.599552547401	219.72856653988	165.184092395696	176.658404094917	183.051604122894
FBgn0051708	59.6486253006641	0.55269858515521	0.272901315702395	2.02526903812343	0.0428397459768467	0.262292123755928	127.219771313798	77.3237160277297	99.9764977756454	152.388141576311	153.863771308476	138.675457668859
FBgn0039757	14160.1457763678	-0.297287322449196	0.146821303644009	-2.02482415746706	0.0428854235697677	0.262387917177213	13754.0029397945	16557.907240888	12901.3627843891	11505.8863231397	11968.3219445208	11693.1145906382
FBgn0037777	92.9133146794609	-0.424011201536722	0.209475663669615	-2.02415495007321	0.0429542111869794	0.262601178624409	87.9837670768324	93.7550056836223	81.2995696197556	45.3674619960011	71.8030932772888	80.4317654479381
FBgn0038610	386.960832472669	-0.340271232465282	0.168126464235373	-2.02390048475004	0.0429803920605363	0.262601178624409	697.925287487846	774.203706727644	624.029128973259	500.20535021232	575.564477857632	581.050167632519
FBgn0034286	131.117342274647	0.701246945452201	0.346679110056721	2.02275512169587	0.0430984007262973	0.263138174105981	255.628512452959	122.751399194021	230.714994866874	395.511207144625	369.273051140342	223.267486846863
FBgn0284251	563.012715398586	0.288071722004909	0.142444906492422	2.02233782237931	0.0431414637755662	0.263147925937388	221.148387517443	187.510011367245	204.347566882088	282.674186282776	218.828474749832	245.45556007388
FBgn0036515	430.083874294221	-0.259629866623452	0.128392598425253	-2.02215602618716	0.0431602355348834	0.263147925937388	290.108637388474	321.859967965425	283.449850836445	240.796529055698	250.74096065085	257.936351264077
FBgn0015756	10349.9262917111	-0.308997599388897	0.152832039208738	-2.02181166323947	0.0431958123978583	0.263181180557941	8654.51135881436	10697.7361124364	7808.05461199464	7023.81373158601	7475.49982231329	7426.07075816739
FBgn0264855	1495.0721940589	0.343974612058319	0.17018898593571	2.02113321356916	0.043265976975773	0.26342497619326	1307.86680789886	962.680264545235	1285.4121142583	1612.2898032425	1523.82120177357	1374.27378549839
FBgn0037998	401.037545395099	0.19319189232831	0.0956601582971154	2.01956484044555	0.0434285452401186	0.264207407372206	367.391676037043	357.62218662825	354.861634961906	411.796962732933	442.215876056953	377.197244859296
FBgn0026268	628.873090088801	-0.296775966393221	0.146986614109443	-2.01906798242355	0.0434801541128334	0.264207407372206	1633.64454004821	1757.18144673016	1405.16418302253	1238.88069296772	1393.89179489086	1271.65394682344
FBgn0003512	190.87026546736	-0.302722716591725	0.149935519106521	-2.01901936509559	0.0434852067988133	0.264207407372206	155.755047122501	140.14923530026	152.711353745217	105.857411324003	127.649943604069	130.354930208727
FBgn0031294	5875.39637732352	0.767211373351601	0.380309025782592	2.01733674811648	0.04366038316301	0.265087399371243	13192.8091822234	4615.25930040512	10924.9043283628	18696.0474153777	17808.3068644069	12396.1991610193
FBgn0262126	724.986964480547	0.292519879586142	0.145040823936801	2.01681065817443	0.0437152762659653	0.265189586655914	890.538399196587	688.181072646794	772.345911387678	1069.04352754679	955.095113751873	851.467310086793
FBgn0010339	547.468402132924	-0.250817475675251	0.124390744063318	-2.01636767722507	0.043761542828199	0.265189586655914	291.297607213837	312.194503461959	302.126778992335	233.816919517852	270.116398519324	257.936351264077
FBgn0013995	1056.60823466047	0.499230069438505	0.247613845376041	2.01616379197353	0.0437828512469163	0.265189586655914	1263.87492436044	917.252581378944	1171.15325965756	1805.39233378958	1602.46268488679	1328.51088446767
FBgn0015399	192.408115616612	0.701682014401064	0.348054322048619	2.01601293232338	0.0437986235028596	0.265189586655914	321.021852847902	173.011814612045	292.23899349804	490.899204161858	435.377486221021	350.848907902213
FBgn0004919	480.215760559354	0.445851109334179	0.221238988621572	2.01524655356658	0.0438788219057104	0.265491182126172	976.144226622694	562.530034101734	761.359483060685	1331.94215347234	1057.67096129086	739.140189375018
FBgn0024194	209.029273325054	-0.387129590521211	0.192166774317389	-2.01455007972302	0.0439518125545168	0.265748779438625	67.7712800456682	75.3906231270365	60.425355798467	54.6736080464629	50.1481921301699	51.3099193374778
FBgn0038426	120.047417275053	-0.445891002072107	0.22147739583596	-2.01325738181589	0.0440875593640492	0.266258059633242	112.952133409447	119.851759842981	73.6090697908598	65.1430223532323	77.501751473899	83.2052746013153
FBgn0000964	119.439205198461	0.672620477029567	0.334117745303632	2.0131240752218	0.044101578060353	0.266258059633242	101.062435155821	59.9258799214905	90.0887122813508	143.08199552585	152.724039669154	102.619838674956
FBgn0039151	882.339416195858	0.375864651344494	0.1867701632984	2.01244483972518	0.0441730658003137	0.266258059633242	1540.90489366993	1178.22012297253	1406.26282585523	1863.55574660497	2041.25936602578	1444.99826890951
FBgn0033948	58.5597370226172	-0.532798262226755	0.264778626794744	-2.01224044658174	0.0441945967734384	0.266258059633242	30.9132154594276	33.8291257621317	42.8470704752766	29.081706407693	21.6549011471188	23.574827803706
FBgn0040475	530.020020049814	-0.232291126672355	0.115454508425747	-2.01197103378383	0.0442229905126278	0.266258059633242	395.926951845746	399.183683993155	379.031777281293	337.347794329239	279.234251633901	386.904526896116
FBgn0011722	1212.77845731152	0.472050566702954	0.234642356872228	2.0117875263246	0.0442423393986776	0.266258059633242	1958.2333023722	1394.72652785017	2195.0883797334	2813.94591200838	2909.73487518918	1969.1914988978
FBgn0033773	270.54872711977	-1.40472543068019	0.698270532065045	-2.01172091069904	0.0442493650666667	0.266258059633242	3.5669094760878	5.79927870207973	9.8877854942946	3.48980476892316	2.27946327864409	1.38675457668859
FBgn0051687	15.8495187325079	0.698102131761002	0.347043941667938	2.01156697450424	0.044265603667436	NA	22.5904266818894	11.5985574041595	21.972856653988	31.4082429203084	33.0522175403393	24.9615823803946
FBgn0260386	35.9127345664564	0.541831899432623	0.269454405454364	2.01084817492208	0.044341495823411	NA	45.1808533637788	40.5949509145581	49.438927471473	67.4695588658478	63.8249718020345	65.1774651043637
FBgn0003462	2915.9510130919	-0.30682425295253	0.152700286559611	-2.00932336058684	0.0445028520453152	0.267599049084597	3631.11384665738	3981.20482897773	3165.19000100697	2622.0066497176	2796.9014428963	3296.31562878878
FBgn0051216	151.325689678	0.303606621430574	0.151172422207566	2.00834660844231	0.0446064722876445	0.268037653629402	204.502809962367	182.677279115511	206.544852547487	271.041503719699	232.505254421697	227.427750576929
FBgn0085261	81.0261387211045	0.732732625478123	0.365019828048436	2.00737759752847	0.0447094723432906	0.268069891535078	15.4566077297138	8.69891805311959	13.1837139923928	17.4490238446158	21.6549011471188	22.1880732270174
FBgn0022943	156.572637339253	-0.327300132436018	0.163058162034361	-2.00726003747697	0.0447219819077829	0.268069891535078	86.7947972514697	114.052481140901	98.877854942946	74.4491684036941	86.6196045884753	79.0450108712495
FBgn0034439	125.489689678623	-0.334415585269376	0.166623525598158	-2.00701301973335	0.0447482766841812	0.268069891535078	234.227055596432	232.937694533536	217.531280874481	144.245263782157	167.54055098034	234.361523460371
FBgn0037550	93.2109725281548	-0.3849690819492	0.191818425773811	-2.00694526814202	0.0447554910475673	0.268069891535078	57.0705516174048	72.4909837759966	81.2995696197556	55.8368763027706	55.8468503267801	49.9231647607892
FBgn0004575	832.421623035203	0.708283346497203	0.352932235667103	2.00685365324713	0.0447652479969873	0.268069891535078	1903.54069040552	781.936078330417	1391.98046903014	2540.57787177606	2474.35738896816	1644.69092795267
FBgn0028381	180.221279156252	-2.27320925027702	1.1329052412545	-2.00653079136595	0.0447996469608031	0.268092133901737	3.5669094760878	5.79927870207973	2.1972856653988	0	1.13973163932204	1.38675457668859
FBgn0243516	351.194321149963	0.345488069902884	0.172252233276157	2.00571025020612	0.0448871709601355	0.268432041532309	521.957753334181	379.852754986222	474.613703726141	657.246564813862	591.520720808141	496.458138454515
FBgn0264747	259.680703906127	2.65557930440496	1.32420159380998	2.00541920264901	0.0449182505211926	0.268434168812353	0	0	1.0986428326994	5.8163412815386	0	1.38675457668859
FBgn0000097	346.432062735985	0.376643025845511	0.187899376465144	2.00449321829111	0.0450172526541256	0.268841925112164	360.257857084868	294.796667355719	359.256206292704	482.756326367704	427.399364745766	404.932336393068
FBgn0085414	551.679017453187	0.766953024676608	0.382696905874074	2.00407427628635	0.0450621044888865	0.26892596101052	1051.04932562054	516.135804485096	956.917907281178	1755.37179876835	1599.04348996883	938.832848418175
FBgn0033519	154.874848782361	-0.427384571316781	0.213296049042412	-2.00371536761002	0.0451005591305245	0.268971730459654	77.2830386485689	77.3237160277297	69.2144984600622	58.163412815386	46.7289972122038	62.4039559509865
FBgn0052582	14.0613308689487	-0.754417404671175	0.376631272306467	-2.00306628828554	0.0451701738638351	NA	23.779396507252	28.9963935103986	32.959284980982	11.6326825630772	10.2575847538984	30.5086006871489
FBgn0001341	378.480279289028	0.435529255975827	0.217474531976867	2.00266786191845	0.0452129505446353	0.268997171096896	87.9837670768324	67.6582515242635	88.9900694486514	137.265654244311	112.833432292882	77.658256294561
FBgn0259163	1169.64672990361	0.356772215167982	0.178159283501425	2.002546306632	0.0452260080132017	0.268997171096896	2118.74422879615	1606.40020047608	2207.1734508931	2767.41518175607	2608.84572240816	2217.42056812505
FBgn0005649	1209.10130081054	0.320828432418779	0.160216265381833	2.00247104533469	0.04523409417493	0.268997171096896	770.452446834964	580.894416658319	805.305196368661	953.879970172331	974.470551620348	761.328262602035
FBgn0032961	1122.7882848308	-0.218311249580222	0.109031601572178	-2.00227499580203	0.0452551636884834	0.268997171096896	625.398128140727	700.7461765013	681.158556273628	567.674909078168	509.460042776954	653.161405620325
FBgn0031461	389.67570658515	0.32837725729027	0.164004821780725	2.00224148122493	0.0452587663399836	0.268997171096896	615.886369537826	517.102350935442	649.297914125346	798.002023827096	841.121949819668	594.917713399405
FBgn0034103	13.6357212178626	-0.706892232789042	0.353051040583993	-2.00223806625736	0.045259133445702	NA	21.4014568565268	32.8625793117851	32.959284980982	15.1224873320004	19.3754378684747	19.4145640736402
FBgn0032015	480.33788394109	-0.219676758414704	0.109747149010702	-2.0016625524667	0.0453210364899807	0.269184157588689	516.012904207368	501.637607729896	496.586560380129	414.123499245548	457.03238736814	428.507164196774
FBgn0261602	11649.8016722804	-0.365793712581408	0.182774072091303	-2.00134356255234	0.0453553782085992	0.269205121880795	11788.6358184702	13474.6240642822	10297.5792708915	8726.83845882052	8982.22504949703	9888.94688636633
FBgn0029709	783.734954720344	-0.325707356648864	0.162822191822869	-2.00038675933803	0.0454585170245372	0.269282695389568	859.625183737159	1024.53923736742	720.709698250807	633.981199687708	711.192542936955	734.979925644952
FBgn0032135	299.784741029139	0.346283868222564	0.173140356645637	2.00001822181351	0.0454982963055659	0.269282695389568	367.391676037043	298.662853157106	307.619993155832	475.776716829858	384.089562451529	375.810490282608
FBgn0030735	782.16242329549	0.208247433279406	0.10413667597293	1.99975110914371	0.0455271463020859	0.269282695389568	764.507597708151	661.117772037089	837.165838516943	888.736947819098	909.505848178991	811.251427362824
FBgn0051148	391.115085007776	2.65512223238362	1.32775574970467	1.99970682331761	0.0455319309639264	0.269282695389568	0	0	1.0986428326994	4.65307302523088	1.13973163932204	1.38675457668859
FBgn0026427	781.320924758948	0.497160784332204	0.248657308035391	1.99938135042242	0.0455671082140301	0.269282695389568	426.840167305173	375.020022734489	502.079774543626	724.71612367971	610.896158676616	503.391911337958
FBgn0047178	116.939866329403	-0.363972522483904	0.182046184501764	-1.99934166969798	0.045571398489585	0.269282695389568	87.9837670768324	128.550677896101	82.398212452455	68.6328271221555	74.0825565559329	92.9125566381354
FBgn0263512	24.2182833911671	0.8893696848197	0.444931062608282	1.99889322090938	0.0456199083887531	NA	36.8580645862406	17.3978361062392	45.0443561406754	69.7960953784632	68.3838983593226	44.3761464540348
FBgn0032791	42.5958193363966	-0.561709432911189	0.281023774523137	-1.99879684152823	0.0456303396815307	0.269282695389568	35.669094760878	42.5280438152513	25.2687851520862	26.7551698950776	26.213827704407	16.6410549202631
FBgn0039713	14148.1761474537	-0.308649020215067	0.154434121554048	-1.99858047631687	0.0456537645508355	0.269282695389568	13858.6322844265	16516.3457435231	11725.8149534007	10933.5583410363	11789.3840771472	11270.1544447482
FBgn0010808	594.404306521707	-0.243558396888343	0.121869076179275	-1.99852501162853	0.0456597710896882	0.269282695389568	638.476796219716	760.672056422791	571.294273003688	558.368763027706	534.534138842039	574.116394749076
FBgn0001137	107.908355929592	-0.303995150528213	0.152121621570063	-1.9983691167018	0.0456766572699256	0.269282695389568	120.085952361623	134.34995659818	132.935782756627	104.694143067695	94.5977260637297	116.487384441841
FBgn0000541	2179.03272980214	0.478579950667089	0.239607287612631	1.99735139709441	0.0457870236653017	0.269751332274943	1468.37773432281	1081.56547793787	1510.63389496168	2179.96471232067	1994.53036881358	1481.05388790341
FBgn0016119	668.938842389676	-0.345155680661189	0.172912461319681	-1.99612959081685	0.0459198188705328	0.270351386436553	650.366494473342	773.237160277297	627.325057471358	509.511496262781	552.769845071191	553.315076098747
FBgn0038381	179.592239052257	-0.355372743580041	0.17809530279895	-1.99540772830611	0.0459984287302538	0.270360145627391	79.6609782992942	111.152841789861	102.173783441044	75.6124366600018	82.0606780311872	72.1112379878066
FBgn0015298	109.265570290516	-0.418642425751037	0.20980936246367	-1.99534673207697	0.0460050763279934	0.270360145627391	90.3617067275575	133.383410147834	86.7927837832526	66.3062906095401	60.4057768840683	109.553611558399
FBgn0016701	579.698336183194	-0.191598146852197	0.0960348891914332	-1.99508895637158	0.0460331786267845	0.270360145627391	694.358378011758	784.835717681456	691.046341767923	596.75661548586	616.594816873226	691.990533767606
FBgn0004057	330.062023145374	0.314010344279156	0.157400263051135	1.99497979350354	0.0460450837465444	0.270360145627391	442.296775034887	397.250591092461	414.188347927674	545.572812208321	536.813602120683	474.270065227497
FBgn0030366	1895.29619962406	0.32528996406837	0.163162095249587	1.99366135603235	0.0461890752315594	0.27102347232917	1645.53423830184	1340.59992663076	1642.4710348856	2068.29095971513	2026.44285471459	1701.5478655969
FBgn0259226	23.8977806568225	0.491518486012239	0.246684715172224	1.99249672063826	0.0463165846381918	NA	45.1808533637788	41.5614973649047	40.6497848098778	54.6736080464629	69.5236299986447	54.083428490855
FBgn0005694	350.6112843425	0.36228288746525	0.181906080232706	1.99159306275961	0.0464157251503925	0.272170597744281	231.849115945707	209.740579725217	246.095994524666	293.143600589545	320.264590649494	269.030387877586
FBgn0015477	1182.41907576957	0.304958313997604	0.153207861396624	1.99048737589339	0.0465372732711626	0.272608033162567	873.892821641511	837.029226000174	995.370406425657	1222.59493737941	1086.16425227391	1033.132159633
FBgn0086450	1282.9913641604	0.341803020075106	0.171730369920866	1.99034696211632	0.0465527281078803	0.272608033162567	1841.71425948667	1986.25295546231	2040.17974032279	2665.04757520099	2320.49361765968	2451.78209158542
FBgn0037835	225.192219922522	-0.286745606252035	0.14416210787066	-1.98904976132354	0.0466957107236863	0.273262173203514	452.99750346315	447.511006510486	398.807348269882	353.633549917547	333.941370321359	378.583999435985
FBgn0052163	79.7745742253361	-0.383318358343248	0.192753981792822	-1.98864041498894	0.0467409071426502	0.27334357811602	96.3065558543705	134.34995659818	102.173783441044	82.5920461978481	86.6196045884753	87.3655383313811
FBgn0010043	16.9813319634022	2.66441710406659	1.34051250774466	1.98761077473968	0.0468547537320337	NA	0	0.966546450346621	0	1.16326825630772	1.13973163932204	5.54701830675435
FBgn0266417	213.896558497016	-0.296034906500954	0.1489418126079	-1.98758764458095	0.04685731389439	0.273607157247083	310.321124419638	311.227957011612	319.705064315526	245.449602080929	254.160155568816	267.643633300898
FBgn0040551	129.272662742398	-0.5009900400668	0.25206153974937	-1.98757033923122	0.0468592294145492	0.273607157247083	123.65286183771	157.547071406499	125.245282927732	76.7757049163095	98.0169209816958	113.713875288464
FBgn0022097	1549.97746985215	-0.294690232462656	0.14828051439175	-1.98738339741727	0.0468799261072317	0.273607157247083	1276.95359243943	1522.31065929593	1184.33697364995	1083.00274662249	1103.26022686374	1062.25400574346
FBgn0085410	115.729461273849	0.338199508659765	0.170325853325376	1.98560290206618	0.0470774339731983	0.274341582649767	236.604995247157	173.011814612045	179.078781730002	289.653795820622	258.719082126104	191.372131583025
FBgn0033178	192.138559878209	-0.307459864431483	0.154857975358345	-1.9854312554456	0.0470965114315637	0.274341582649767	204.502809962367	234.870787434229	181.276067395401	174.490238446158	164.121356062374	163.637040049253
FBgn0026563	148.922358967881	0.361428042979112	0.182042915700328	1.98540020955324	0.0470999626845199	0.274341582649767	219.959417692081	245.502798388042	230.714994866874	322.225306997239	320.264590649494	251.002578380635
FBgn0010516	1670.60914967164	-0.255336140561189	0.128649838069839	-1.98473736455523	0.0471736993985721	0.274588015753048	2052.16191857585	2384.47009300511	1869.89010125438	1606.47346196096	1869.15988848815	1809.71472257861
FBgn0029831	1184.89809394625	-0.499935902755895	0.252047162351902	-1.98350141335016	0.0473114493531925	0.275115596024517	3107.96712349783	1843.20408081101	2133.56438110224	2238.12812513605	1709.59745898307	1059.48049659008
FBgn0032248	190.406763298266	-0.395519141310276	0.199418808423984	-1.98335926503665	0.0473273138176547	0.275115596024517	118.89698253626	163.346350108579	108.765640437241	101.204338298772	92.3182627850856	105.393347828333
FBgn0036766	1062.39587014405	-1.35405437340664	0.683047672669526	-1.98237169612868	0.0474376550067028	0.275573664756358	92.7396463782827	84.089541180156	220.827209372579	34.8980476892316	36.4714124583054	84.5920291780039
FBgn0266322	15.9182019748279	0.683314875673656	0.344776786537663	1.98190511181359	0.0474898617198716	NA	14.2676379043512	17.3978361062392	14.2823568250922	23.2653651261544	29.6330226223731	20.8013186503288
FBgn0261274	312.989146314208	-0.238551594934771	0.120373541212661	-1.98176104592061	0.0475059911935026	0.275643644860472	238.982934897882	243.569705487349	257.08242285166	225.674041723698	184.636525570171	217.720468540108
FBgn0052758	555.921472019183	0.461903924731643	0.233084658128769	1.98170024762617	0.0475127994918017	0.275643644860472	802.554632119755	594.426066963172	783.332339714672	1063.22718626526	1098.70130030645	838.986518896596
FBgn0013676	35999.7609861309	-0.566238621086259	0.285950876238368	-1.98019543963294	0.0476815721064423	0.276439213997337	41321.4573106518	75443.7831818055	53513.7937379551	37481.6664864911	30814.9243323501	46707.2808974484
FBgn0052649	301.149506721753	-0.269378815259993	0.136079786417811	-1.97956524147465	0.0477524019138808	0.276499769588928	312.699064070364	376.953115635182	335.086063973317	285.000722795391	266.697203601358	300.925743141424
FBgn0031231	260.080747456745	-0.253371498553711	0.12799517996696	-1.97953937499141	0.0477553110117537	0.276499769588928	166.455775550764	185.576918466551	158.204567908714	133.775849475388	139.047259997289	158.090021742499
FBgn0013983	291.296925179043	-0.23975839844344	0.121179099714735	-1.97854579715356	0.0478671674664324	0.276963868976305	274.65202965876	336.358164720624	283.449850836445	255.919016387698	257.579350486782	245.45556007388
FBgn0037324	148.086964658848	0.519053589385486	0.262402202997041	1.97808396216605	0.0479192355129023	0.27708164174469	338.856400228341	242.603159037002	244.997351691966	502.531886724935	444.495339335597	234.361523460371
FBgn0086659	2851.63090047161	-0.682673562089669	0.345288419878554	-1.97711108391582	0.048029075179566	0.277533088521077	2668.04828811367	4857.86245944212	1930.31545705285	1536.6773665825	1822.43089127595	2533.60061161005
FBgn0010078	7867.14124512171	-0.30844263086499	0.156090759269607	-1.97604670710989	0.0481494874531318	0.278012900904398	8079.04996333886	9504.05124625833	7402.65540672856	6286.30165708692	6999.09199707667	6892.17024614229
FBgn0024941	121.941057657607	0.683070770162204	0.34571598084825	1.97581485381792	0.0481757504829185	0.278012900904398	249.683663326146	119.851759842981	192.262495722395	325.715111766162	338.500296878647	235.74827803706
FBgn0263110	939.522836986862	0.402562941011024	0.203785124999922	1.97542848630967	0.0482195427470692	0.278081943881943	1085.52945055605	853.460515656067	1221.69082996173	1613.45307149881	1384.77394177628	1177.35463560861
FBgn0033523	139.006135982554	-0.392946845265701	0.198974613190534	-1.97485919919555	0.0482841287030746	0.27809931045513	123.65286183771	146.915060452686	150.514068079818	111.673752605541	101.436115899662	108.16685698171
FBgn0261111	82.707762408208	-0.381374501021421	0.193116577204551	-1.97484082693464	0.0482862142566592	0.27809931045513	74.9050989978438	82.1564482794628	69.2144984600622	65.1430223532323	58.1263136054242	49.9231647607892
FBgn0023167	99.9777773249238	-0.522965532482668	0.264859021724676	-1.97450526350693	0.0483243195359278	0.278135428053624	33.2911551101528	41.5614973649047	40.6497848098778	27.9184381513853	21.6549011471188	31.8953552638375
FBgn0036735	787.932286260061	0.395735869180613	0.200505641147769	1.97368945290155	0.048417065182637	0.278401944561415	737.161291724812	519.035443836136	775.641839885777	945.737092378177	956.234845391195	768.262035485478
FBgn0003415	1155.13288144661	0.542058139417632	0.27472413500721	1.97309981303028	0.0484841915862751	0.278401944561415	1278.14256226479	901.787838173398	1199.71797330775	1914.73954988251	1738.09074996612	1266.10692851668
FBgn0064225	16067.3239479902	-0.341765038532405	0.173217588073015	-1.97303889480521	0.0484911311555082	0.278401944561415	14218.8901415113	18246.4638896435	13250.7312051875	10951.0073648809	11942.1081168164	13182.4890060017
FBgn0028899	24.6581639726291	0.736447902409726	0.373258390360483	1.97302437514796	0.0484927853019565	NA	28.5352758087024	17.3978361062392	41.7484276425772	47.6939985086165	66.1044350806785	30.5086006871489
FBgn0036765	150.079403990691	0.281098783486182	0.142474372415345	1.97297786767374	0.0484980839673199	0.278401944561415	175.967534153665	161.413257207886	163.697782072211	195.429067059697	238.203912618307	171.957567509385
FBgn0037025	241.902669699635	0.657363119651629	0.333236954520046	1.97265972676534	0.0485343432727196	0.278427155071406	13.0786680789886	20.297475457279	15.3809996577916	24.4286333824621	31.9124859010172	20.8013186503288
FBgn0261597	9527.52763491257	-0.366218239662507	0.18570760491623	-1.97201530776137	0.0486078590616245	0.278432992058402	9583.09679242255	11605.3232293119	8905.59880186134	7561.24366600018	7727.38051460346	8059.81759971408
FBgn0033912	11976.5811568455	-0.311763222072032	0.158108162608922	-1.97183508382912	0.0486284358632812	0.278432992058402	10239.4081360227	12898.5623798757	9474.69578919963	8341.79666598266	8966.26880654652	8968.1418474451
FBgn0028499	148.836060548929	0.410020112536604	0.20794067525854	1.97181293187017	0.0486309655352091	0.278432992058402	222.337357342806	146.915060452686	182.3747102281	273.368040232314	255.299887208138	201.079413619845
FBgn0030759	145.378852017993	-0.398061664202422	0.201971355556325	-1.97088177729942	0.0487373999365465	0.278732375830678	97.4955256797331	164.312896558926	102.173783441044	81.4287779415404	83.2004096705092	115.100629865153
FBgn0039563	310.582317399584	-0.38471731614403	0.195208968392324	-1.97079734252188	0.0487470608068302	0.278732375830678	86.7947972514697	89.8888198822358	82.398212452455	69.7960953784632	67.2441667200006	61.0172013742979
FBgn0032835	73.8922254321417	0.471482158241234	0.239355217329426	1.96980104925948	0.0488611762916415	0.279115395318924	90.3617067275575	118.885213392634	141.724925418223	191.939262290774	149.304844751188	145.609230552302
FBgn0031630	68.2182700217114	-0.371150322763899	0.188434191968688	-1.96965486404704	0.0488779392054429	0.279115395318924	130.786680789886	128.550677896101	119.752068764235	72.1226318910787	118.532090489493	102.619838674956
FBgn0266349	26.9137974900931	-0.531506846777185	0.26987860212705	-1.96942937523802	0.0489038052504044	NA	46.3698231891414	55.0931476697574	56.0307844676694	34.8980476892316	30.7727542616952	44.3761464540348
FBgn0004404	1926.73677091787	-0.36568006546734	0.185690585250058	-1.96929782398446	0.0489189009316436	0.279166843526956	1902.35172058016	2559.41500051785	2003.92452684371	1608.79999847358	1706.1782640651	1704.32137475028
FBgn0035091	1242.36914717922	0.367932439466051	0.186868216770138	1.96894071033297	0.0489598999203676	0.279218437078493	2140.14568565268	1590.93545727054	2080.82952513266	2860.47664226068	2666.97203601358	1969.1914988978
FBgn0030320	595.576886695572	0.280586980398759	0.142549142834517	1.96835263137631	0.0490274780936437	0.279421445599586	237.79396507252	246.469344838388	318.606421482826	362.939695968009	316.845395731528	293.991970257981
FBgn0004666	132.466730504191	0.545133778627253	0.276988688936075	1.96807234519624	0.0490597142796345	0.279422896780421	26.1573361579772	29.9629399607453	34.0579278136814	57.0001445590783	45.5892655728818	27.7350915337718
FBgn0037535	117.531747769389	-0.360566539176097	0.183292601867649	-1.96716362527525	0.0491643500438416	0.279802506073721	79.6609782992942	91.821912782929	88.9900694486514	58.163412815386	63.8249718020345	83.2052746013153
FBgn0043575	187.858976871639	-1.34492582423246	0.684046003793204	-1.96613358863953	0.0492831813689771	0.279802506073721	110.574193758722	369.220744032409	82.398212452455	30.2449746640007	35.3316808189834	156.703267165811
FBgn0031489	1133.4184507818	-0.611469297376619	0.311129606129499	-1.96532019238989	0.0493771899443051	0.279802506073721	1238.90655802783	2372.87153560096	1495.25289530388	920.145190739407	1042.85444997967	1381.20755838183
FBgn0037265	171.689011802298	-0.336235790577624	0.171097429207442	-1.96517149401447	0.0493943920700511	0.279802506073721	222.337357342806	219.406044228683	242.800066026567	189.612725778158	180.077599012883	171.957567509385
FBgn0069242	352.718157108247	-0.287628397193664	0.146369890653161	-1.96507899206695	0.0494050956658019	0.279802506073721	287.730697737749	349.889815025477	312.01456448663	282.674186282776	253.020423929494	242.682050920503
FBgn0032218	267.624641913488	0.26367965483498	0.134214277246344	1.96461703065322	0.0494585793257896	0.279802506073721	350.746098481967	315.094142812999	296.633564828838	409.470426220318	371.552514418986	373.03698112923
FBgn0023416	337.278082499349	0.639335308279182	0.325427311992238	1.96460249253582	0.0494602632667839	0.279802506073721	670.578981504506	391.451312390382	574.590201501786	999.247432168332	939.138870801364	608.78525916629
FBgn0261444	701.747888468811	0.329016114826068	0.167512042016016	1.96413410562215	0.0495145419708245	0.279802506073721	1165.19042885535	837.995772450521	1042.61204823173	1385.45249326249	1309.55165358103	1127.43147084782
FBgn0263395	715.579706604675	0.436521247718867	0.222254974931193	1.964056138019	0.0495235820435617	0.279802506073721	964.254528369068	699.779630050954	962.411121444675	1388.94229803142	1145.43029751865	1017.87785928942
FBgn0267002	2522.00971228881	0.542560695136004	0.276261705916603	1.9639373952892	0.0495373525104395	0.279802506073721	4672.65141367502	2862.91058592669	4456.09532942877	6903.99710118632	6097.56427037294	4462.57622778388
FBgn0034720	457.090163705047	0.376516787140526	0.191727816155193	1.96380887599406	0.0495522603743457	0.279802506073721	959.498649067618	676.582515242635	737.189340741298	1112.08445303018	1097.56156866713	868.108365007056
FBgn0001316	1692.17524809191	0.372446235864342	0.189667174588698	1.9636831553589	0.0495668472428473	0.279802506073721	1777.50988891709	1500.08009093796	1887.46838657757	2392.84280322498	2272.62488880816	2019.11466365858
FBgn0028496	445.619657684929	0.512416017649737	0.260978028829556	1.96344504534669	0.0495944840774241	0.279802506073721	889.349429371224	513.236165134056	864.631909334428	1191.18669445911	1169.36466194442	870.881874160434
FBgn0263120	5396.23714694894	0.348150588921904	0.177323830784888	1.96336040892465	0.0496043107286584	0.279802506073721	7730.68180450762	5836.97401364325	6976.38198764119	10144.8624632596	9668.3434963689	6333.30815173678
FBgn0004556	269.294649284016	0.344511400208221	0.175527504972568	1.96272031703557	0.0496786810314003	0.279802506073721	80.8499481246567	99.554284385702	91.1873551140502	130.286044706465	107.134774096272	108.16685698171
FBgn0263353	183.725925528318	0.802776351624799	0.409020199792142	1.96268143243966	0.0496832019240618	0.279802506073721	365.013736386318	156.580524956153	288.943064999942	565.348372565552	520.857359170174	325.887325521818
FBgn0039932	73.9573685474337	0.41964023388651	0.213820031522147	1.96258615668123	0.0496942805576338	0.279802506073721	78.4720084739316	58.9593334711439	78.0036411216574	109.347216092926	103.715579178306	72.1112379878066
FBgn0022700	291.034662817002	-1.45137980880789	0.739551775137404	-1.96251277814624	0.0497028144015582	0.279802506073721	13.0786680789886	125.651038545061	104.371069106443	17.4490238446158	12.5370480325425	59.6304467976093
FBgn0035285	674.970337370951	0.227558730457653	0.115981499947772	1.96202610381937	0.0497594452103486	0.27994093548153	974.955256797331	851.527422755373	911.873551140502	1186.53362143387	1088.44371555255	926.352057227977
FBgn0035335	190.946911840164	-0.367603839086112	0.187564287287561	-1.95988183252884	0.0500096035331848	0.281167249722932	145.054318694237	175.911453963085	127.44256859313	100.041070042464	115.112895571526	134.515193938793
FBgn0030421	347.307918945104	0.261277442396802	0.13333256706249	1.95959207981308	0.0500434878421058	0.281176818827317	550.493029142883	445.577913609792	520.756702699516	671.205783889555	571.005551300344	572.729640172387
FBgn0262582	1185.46070297801	0.475009544610359	0.242510897501315	1.95871422482275	0.0501462636118426	0.281401299322199	1627.6996909214	1057.4018166792	1489.75968114039	2076.43383750928	1895.37371619256	1829.12928665225
FBgn0033085	71.5702269004443	-0.446548133719081	0.228011327325747	-1.95844714802753	0.0501775669813193	0.281401299322199	61.8264309188552	79.2568089284229	57.1294273003688	46.5307302523088	38.7508757369495	62.4039559509865
FBgn0035086	187.05771541423	0.631896909597463	0.322657817068103	1.95841190317137	0.050181699161425	0.281401299322199	370.958585513131	207.807486824524	284.548493669145	532.776861388936	453.613192450173	349.462153325524
FBgn0015834	2158.66862817802	-0.255351935335111	0.130404605342135	-1.95815120689304	0.0502122725928017	0.281401299322199	1479.07846275107	1785.21129379021	1386.48725486664	1273.77874065695	1315.25031177764	1309.09632039403
FBgn0033548	192.357489252662	-0.440393481865263	0.224993849561164	-1.95735786877829	0.050305408222203	0.281534484104404	64.2043705695804	85.0560876305027	73.6090697908598	48.8572667649242	44.4495339335597	73.4979925644952
FBgn0264822	120.759152334963	-0.351149655669876	0.179406394228502	-1.95728617800897	0.0503138316419819	0.281534484104404	165.266805725401	227.138415831456	183.4733530608	122.143166912311	148.165113111866	184.438358699582
FBgn0261989	1662.82687030477	-0.734647110203539	0.37544318994685	-1.95674639965514	0.0503772917129057	0.281534484104404	477.965869795765	878.590723365079	697.638198764119	318.735502228315	330.522175403393	586.597185939273
FBgn0013751	26.0054927376244	0.59973298816606	0.306510411941087	1.95664801194855	0.0503888660755357	NA	48.7477628398666	25.1302077090122	32.959284980982	53.5103397901551	59.2660452447463	47.149655607412
FBgn0038536	105.891433790646	-0.346511432196346	0.177097880119242	-1.95660971188947	0.0503933723098208	0.281534484104404	82.0389179500194	96.6546450346621	94.4832836121484	70.9593636347709	61.5455085233904	84.5920291780039
FBgn0011672	1143.76432809481	-0.196447770336591	0.100403772891631	-1.9565775735203	0.0503971538444876	0.281534484104404	1123.57648496766	1429.52220006265	1214.00033013284	1058.57411324003	1007.52276916069	1228.66455494609
FBgn0051229	163.736860057907	-0.347024220286938	0.177389873719958	-1.95627976394401	0.0504322066749913	0.281534791396029	174.778564328302	193.309290069324	150.514068079818	114.000289118157	140.186991636611	155.316512589122
FBgn0036887	473.967795166755	-0.324889468707924	0.166122822107999	-1.95571845328216	0.0504983296948759	0.281534791396029	305.565245118188	423.34734525182	293.33763633074	246.612870337237	254.160155568816	318.953552638375
FBgn0039911	434.686273722365	0.470623086690317	0.240646447699501	1.95566188983596	0.0505049969588298	0.281534791396029	916.695735354564	546.098744445841	770.14862572228	1137.67635466895	1088.44371555255	865.334855853679
FBgn0020545	674.922715869247	-0.366489211153831	0.187416220647819	-1.95548288129507	0.0505261019696663	0.281534791396029	606.374610934926	893.088920120278	734.992055075899	531.613593132628	541.372528677971	662.868687657145
FBgn0028644	161.990563748213	0.714424721839612	0.365578974752541	1.95422814543206	0.0506742421744678	0.281994558600343	347.179189005879	150.781246254073	268.068851178654	497.878813699704	475.268093597292	281.511179067783
FBgn0000079	2682.91167810939	-0.266326211964061	0.136315422992419	-1.95374966469402	0.0507308296855662	0.281994558600343	1218.69407099666	1261.34311770234	1496.35153813658	1105.10484349233	1057.67096129086	1144.07252576809
FBgn0003896	100.242293782381	0.406701442722678	0.208166797897597	1.9537286773405	0.0507333129656883	0.281994558600343	200.935900486279	140.14923530026	179.078781730002	243.123065568314	242.762839175595	201.079413619845
FBgn0001989	640.544903002271	-0.276883484210601	0.14173972100055	-1.95346429537226	0.0507646040730289	0.281994558600343	785.909054564678	821.564482794628	710.821912756512	609.552566305245	632.551059823734	672.575969693965
FBgn0034180	585.740975894388	0.255655206332167	0.130893633980964	1.95315233107019	0.0508015476107791	0.281994558600343	694.358378011758	649.519214632929	798.713339372464	822.430657209558	884.431752113906	850.080555510105
FBgn0033987	564.094564945271	0.279071949079803	0.142905365182598	1.95284444865465	0.0508380298390524	0.281994558600343	1035.59271789082	772.27061382695	1003.06090625455	1228.41127866095	1132.89324948611	1045.6129508232
FBgn0250868	173.86133087945	-0.405543602337017	0.207693179623407	-1.95260914716774	0.0508659264523741	0.281994558600343	90.3617067275575	144.981967551993	97.7792121102466	62.8164858406169	88.8990678671194	102.619838674956
FBgn0082922	1513.94067986304	-0.704233770805205	0.360664342750082	-1.95260159469991	0.0508668220618222	0.281994558600343	1573.00707895472	3097.78137336092	976.693478269767	1036.47201637018	1107.81915342103	1322.96386616091
FBgn0033807	77.6729805597513	-0.410517132681246	0.210385471632253	-1.95126179339425	0.0510259115386062	0.28269713957692	108.196254107997	118.885213392634	76.904998288958	77.9389731726173	66.1044350806785	85.9787837546925
FBgn0039928	2210.34789596844	0.369587314637562	0.189454064740919	1.95080171619953	0.0510806376257073	0.282820995523324	3541.94110975518	2788.48650925	3379.42535338336	4198.23513701456	4443.81366171665	3900.940624225
FBgn0051646	53.8930089670972	0.58675159693891	0.300949447059465	1.94966830034738	0.0512156669178414	0.283389032211007	109.385223933359	71.52443732565	75.8063554562586	134.939117731696	151.584308029832	97.0728203682012
FBgn0004580	445.316217574635	0.539944673935069	0.277015527019911	1.94914949260682	0.0512775746155041	0.283552005959278	866.759002689335	505.503793531283	786.628268212771	1172.57440235818	1170.50439358374	793.223617865873
FBgn0036494	158.582746619992	0.774753717713895	0.397559259924889	1.94877543000827	0.0513222491876999	0.283619538996163	324.58876232399	159.480164307192	248.293280190064	535.103397901551	471.848898679326	244.068805497192
FBgn0015521	3585.87770850273	-0.329535777819281	0.169124742840646	-1.94847762831356	0.0513578391554591	0.283636814602557	3313.65890328556	3822.69121112089	2781.76365239488	2389.35299845606	2709.1421066685	2795.69722660419
FBgn0023174	916.666895569142	-0.284146881141453	0.145892445681594	-1.94764629391158	0.0514573004082072	0.283812351339967	521.957753334181	637.92065722877	547.124130684301	438.552132628011	450.193997532207	515.872702528155
FBgn0050069	735.162044028169	0.338649041951712	0.17389389291672	1.94744643570603	0.0514812355649931	0.283812351339967	1146.16691164955	956.880985843155	1189.83018781345	1579.71829206588	1430.36320734917	1151.00629865153
FBgn0263846	141.281860619892	0.529938022335252	0.272142524767982	1.94728120049249	0.0515010312844626	0.283812351339967	272.274090008035	173.978361062392	240.602780361169	361.776427711701	380.670367533563	246.842314650569
FBgn0085371	22.2955298666379	0.588200808135388	0.302107600835418	1.94699109359988	0.0515358024518437	NA	38.0470344116032	36.7287651131716	40.6497848098778	66.3062906095401	68.3838983593226	37.4423735705919
FBgn0034654	1186.96442083657	-0.296687471440913	0.152395139280679	-1.94683027845447	0.0515550856389311	0.283812351339967	860.814153562522	1107.66223209723	872.322409163324	744.491684036941	744.244760477295	826.505727706399
FBgn0065076	373.60222327347	-0.683067454449605	0.350992351541744	-1.94610353031686	0.051642304620049	0.283812351339967	241.360874548608	567.362766353467	206.544852547487	175.653506702466	196.033841963392	262.096614994143
FBgn0035802	566.61791303492	0.288039876491005	0.14802217122789	1.94592387141484	0.0516638849889335	0.283812351339967	732.405412423361	737.474941614472	858.040052338232	1028.32913857602	945.977260637296	866.721610430368
FBgn0024806	691.843193132011	0.328138429872316	0.168630569013587	1.94590121940392	0.0516666064515445	0.283812351339967	684.846619408857	531.600547690642	692.144984600622	827.083730234789	821.746511951194	744.687207681772
FBgn0263748	97.2302059396684	-0.809409540002106	0.415960391383182	-1.94588128285628	0.0516690017716531	0.283812351339967	67.7712800456682	62.8255192725304	148.316782414419	54.6736080464629	49.0084604908479	55.4701830675435
FBgn0034488	724.08336393064	-0.220112095026935	0.113123197213811	-1.94577328477472	0.0516819790525223	0.283812351339967	392.360042369658	381.785847886915	357.058920627305	359.449891199086	306.58781097763	303.699252294801
FBgn0034664	293.247432699923	-0.717440499323015	0.368881485464292	-1.94490785684191	0.0517860692566545	0.283930759153759	14.2676379043512	29.9629399607453	14.2823568250922	8.14287779415404	22.7946327864409	4.16026373006577
FBgn0285925	1832.70129551799	0.400742212685441	0.206100632162659	1.94440069630241	0.0518471499693733	0.283930759153759	3148.39209756016	2216.2910106448	2638.94008414396	3736.4176392604	3942.33174041495	2884.44951951226
FBgn0014075	1261.10578902529	0.219214201819434	0.112745051719838	1.94433545841251	0.0518550113753766	0.283930759153759	1128.33236426911	1097.99676759376	1192.02747347885	1497.12624586804	1279.91863095866	1199.54270883563
FBgn0011828	434.485436005982	0.381835972790728	0.196402320741737	1.94415204132354	0.0518771191536789	0.283930759153759	833.467847579182	610.857356619065	752.570340399089	1020.18626078187	1033.73659686509	805.70440905607
FBgn0052549	2051.69053402988	0.23336683968865	0.120036575320706	1.94413110391691	0.051879643299635	0.283930759153759	3203.08470952684	2741.12573318302	3260.77192745182	3725.94822495363	3665.37695205969	3426.6705589975
FBgn0263782	354.302944214664	0.422160652818998	0.217167185720954	1.94394310271832	0.0519023127191921	0.283930759153759	394.737982020383	282.231563501213	351.565706463808	514.164569288012	478.687288515258	382.74426316605
FBgn0029114	202.095646950077	0.310268920812646	0.159627569655117	1.94370509732747	0.0519310235925039	0.283930759153759	225.904266818894	250.335530639775	190.065210056996	271.041503719699	256.43961884746	300.925743141424
FBgn0037614	346.034050786688	0.437150451221576	0.224962605570347	1.94321385153444	0.0519903251701567	0.284077217643314	95.1175860290079	63.792065722877	96.6805692775472	133.775849475388	113.973163932204	95.6860657915126
FBgn0038880	30.8463129619896	0.667843811987544	0.343801940524925	1.94252484720669	0.0520735949419823	NA	72.5271593471186	38.6618580138649	47.2416418060742	82.5920461978481	98.0169209816958	69.3377288344294
FBgn0050499	521.101180483235	-0.23851407476915	0.122789539357587	-1.94246249327926	0.0520811362412108	0.284395554587162	298.431426166012	363.42146533033	314.211850152028	265.22516243816	291.771299666443	271.803897030963
FBgn0033635	831.575770579464	-0.328797302207658	0.169363842444768	-1.94136657188139	0.0522138299469252	0.28477972857368	111.763163584084	122.751399194021	128.54121142583	84.9185827104636	76.3620198345769	131.741684785416
FBgn0040056	1414.45977031591	0.325967645912461	0.167914914979843	1.94126677759145	0.0522259270305324	0.28477972857368	1752.54152258447	1479.78261548068	1829.2403164445	2103.18900740436	2224.75615995663	2014.95439992852
FBgn0033739	563.462273944829	0.305284726130236	0.157276172495475	1.94107423449041	0.0522492737671521	0.28477972857368	813.255360548018	676.582515242635	872.322409163324	1022.51279729449	1028.03793866848	865.334855853679
FBgn0003396	888.352832213326	0.334637121079429	0.172478790721446	1.94016388727974	0.0523597757704359	0.28510559399081	1196.10364431477	950.115160690729	1179.94240231916	1521.5548792505	1456.57703505357	1213.41025460252
FBgn0031267	296.275921034952	-0.367354660740736	0.189375372531671	-1.93982277542081	0.052401231746791	0.28510559399081	116.519042885535	130.483770796794	126.343925760431	83.7553144541559	91.1785311457635	116.487384441841
FBgn0085229	239.395352965095	-0.399634629645913	0.206035246207857	-1.9396420612556	0.0524232054034003	0.28510559399081	160.510926423951	231.004601632842	173.585567566505	146.571800294773	132.208870161357	151.156248859056
FBgn0037102	149.374133485373	-0.31951843193586	0.164742056833729	-1.93950736124622	0.0524395890515316	0.28510559399081	111.763163584084	122.751399194021	126.343925760431	95.3879970172331	93.4579944244076	101.233084098267
FBgn0010382	622.04655191175	0.66865302858531	0.344841454174321	1.93901580129429	0.0524994141239604	0.285168469421211	20.2124870311642	9.66546450346621	20.8742138212886	32.5715111766162	20.5151695077968	26.3483369570832
FBgn0035986	169.278404921217	0.376471166935516	0.194169795260075	1.93887605655278	0.052516432104696	0.285168469421211	91.5506765529202	72.4909837759966	69.2144984600622	102.367606555079	96.8771893423737	102.619838674956
FBgn0031384	489.157599076201	0.456014721925444	0.235501258481595	1.93635789832131	0.0528238821599874	0.286582534235773	521.957753334181	356.655640177903	488.896060551233	736.348806242787	654.205960970853	482.590592687629
FBgn0261238	677.657411776253	0.432988633640866	0.223627331743003	1.93620623322763	0.0528424473679559	0.286582534235773	519.579813683456	361.488372429636	560.307844676694	752.634561831095	641.668912938311	549.154812368681
FBgn0032083	33.9985963315252	0.478147131344644	0.246953831630334	1.93618024951475	0.0528456285614131	NA	67.7712800456682	56.059694120104	57.1294273003688	105.857411324003	83.2004096705092	61.0172013742979
FBgn0004841	34.7023478809084	0.562585812857131	0.290598349767195	1.93595666770933	0.0528730083604955	NA	76.0940688232064	56.059694120104	58.2280701330682	112.837020861849	94.5977260637297	72.1112379878066
FBgn0286508	2510.88851799831	0.283113956370907	0.146272976899744	1.93551784048912	0.0529267815534477	0.286861842700045	3556.20874765953	3323.95324274203	3099.27143104501	4265.70469588041	4378.84895827529	3496.00828783193
FBgn0005771	521.525201056728	0.186358855786169	0.0963289425364111	1.93460917227165	0.0530382736142928	0.287287908597691	898.861187974125	811.899018291162	812.995696197556	994.594359143101	973.330819981026	900.003720270894
FBgn0032707	28.7334971791682	0.538948820264022	0.278688637973465	1.93387439180544	0.0531285733778942	NA	41.613943887691	35.762218662825	52.7348559695712	59.3266810716937	80.9209463918651	47.149655607412
FBgn0046687	222.22094052963	-0.376456452262673	0.194714611136043	-1.93337546713251	0.053189961178004	0.287931035199641	103.440374806546	129.517224346447	94.4832836121484	84.9185827104636	78.641483113221	90.1390474847583
FBgn0031068	97.2723432218574	-0.45299244165421	0.234418751468924	-1.93240702296916	0.0533092879007433	0.288022364027431	83.2278877753819	96.6546450346621	85.6941409505532	61.6532175843092	53.5673870481361	80.4317654479381
FBgn0001234	7562.59854755219	0.715842467909637	0.370459810194958	1.93230803506842	0.053321497268017	0.288022364027431	18499.1815128167	5279.27671179325	10996.3161124883	19124.1301336989	18283.5749580042	19705.7825347448
FBgn0028579	423.180951063566	0.272930647339767	0.141263042061444	1.93207397601598	0.0533503758743874	0.288022364027431	369.769615687768	340.224350522011	405.399205266079	465.307302523088	461.591313925428	418.799882159954
FBgn0031703	370.816085016066	0.333009132721528	0.172363193563394	1.93201997385277	0.0533570406080766	0.288022364027431	502.934236128379	447.511006510486	493.290631882031	642.124077481862	718.030932772888	454.855501153857
FBgn0266409	175.54792759288	0.34347412512828	0.177790700392034	1.9319015244943	0.0533716615955604	0.288022364027431	224.715296993531	130.483770796794	190.065210056996	222.184236954775	250.74096065085	214.946959386731
FBgn0266958	47.4457199986404	0.624582436837942	0.323440470465697	1.93105839828471	0.0534758309485853	0.288134281721348	43.9918835384162	37.6953115635182	57.1294273003688	68.6328271221555	64.9647034413565	80.4317654479381
FBgn0263093	204.472841107092	0.294093836637095	0.152332804031059	1.93060082171882	0.053532436179933	0.288134281721348	281.785848610936	239.703519685962	276.857993840249	348.980476892316	346.478418353901	280.124424491095
FBgn0030292	214.536343331453	-0.320344203584786	0.165936178466544	-1.93052658284145	0.0535416247333027	0.288134281721348	228.282206469619	253.235169990815	214.235352376383	180.306579727697	172.099477537629	206.6264319266
FBgn0262537	94.826132371221	-0.490457642206069	0.254086746535299	-1.93027636779132	0.0535726035759166	0.288134281721348	186.668262581928	276.432284799134	190.065210056996	112.837020861849	150.44457639051	203.852922773223
FBgn0025637	1489.27011125247	-0.20060938146007	0.103962489527775	-1.92963233538644	0.0536524093483263	0.288134281721348	1154.48970042708	1417.92364265849	1204.11254463854	1021.34952903818	1096.42183702781	1173.19437187855
FBgn0262169	564.309376578898	0.18509791842074	0.0959255199111056	1.92960036695418	0.053656373325826	0.288134281721348	577.839335126223	537.399826392721	570.195630170989	635.144467944015	580.12340441492	703.084570381114
FBgn0036316	2461.87879337765	0.251367100934609	0.1302730855721	1.92953978045979	0.0536638865171329	0.288134281721348	2732.25265868325	2390.26937170719	2808.13108037967	3479.33535461639	2957.6036040407	3000.93690395411
FBgn0038972	264.791650699443	-0.436105300237691	0.226045921412302	-1.9292774561601	0.0536964268838144	0.288134281721348	172.400624677577	211.67367262591	212.038066710984	117.49009388708	145.885649833222	178.891340392828
FBgn0030675	45.9344513536239	-0.542919686059669	0.281462331177366	-1.92892485395335	0.0537401918464172	0.288134281721348	33.2911551101528	33.8291257621317	42.8470704752766	31.4082429203084	23.9343644257629	19.4145640736402
FBgn0261068	197.453908526663	-0.3722859742337	0.193095268352481	-1.92799117974305	0.0538562232820098	0.288134281721348	90.3617067275575	82.1564482794628	68.1158556273628	57.0001445590783	63.8249718020345	65.1774651043637
FBgn0035085	40.9022195640778	-1.02143119010188	0.529803081222115	-1.92794497862435	0.0538619703062792	0.288134281721348	11.889698253626	10.6320109538128	9.8877854942946	2.32653651261544	5.69865819661022	8.32052746013153
FBgn0086691	999.027033808675	-0.28762314220492	0.14918825615694	-1.92792080029645	0.0538649780876621	0.288134281721348	1360.18148021481	1895.39758912972	1407.36146868793	1089.98235616033	1410.98776948069	1321.57711158422
FBgn0027611	3007.74855276491	0.345644832804375	0.179291503531052	1.9278372147987	0.053875377194769	0.288134281721348	4163.77232841982	3637.11429265434	4601.11618334509	5654.64699391183	5682.70195365971	4419.58683590653
FBgn0031484	175.641210136224	-0.490394439930519	0.254377686134407	-1.92782019281127	0.0538774951535345	0.288134281721348	64.2043705695804	102.453923736742	99.9764977756454	51.1838032775397	83.2004096705092	55.4701830675435
FBgn0046214	2428.43405291189	-0.175345782966373	0.0909639670436246	-1.92764001686822	0.0538999177855667	0.288134281721348	898.861187974125	942.382789087956	863.533266501729	824.757193722174	780.7161729356	790.450108712496
FBgn0278608	1092.15153935732	0.394573485614512	0.204709697509584	1.9274782309521	0.0539200584427611	0.288134281721348	1225.82788994884	899.854745272704	1183.23833081725	1571.57541427173	1519.26227521628	1256.39964647986
FBgn0047114	46.1858882324796	-0.463915525241114	0.240785879837277	-1.92667246748284	0.0540204611585884	0.28834679554958	49.9367326652292	48.3273225173311	41.7484276425772	30.2449746640007	33.0522175403393	38.8291281472805
FBgn0265413	646.231394521257	-0.385289853413574	0.199990097200342	-1.92654465799677	0.0540364012775637	0.28834679554958	758.562748581338	1011.00758706257	908.577622642404	602.572956767399	634.830523102378	815.41169109289
FBgn0051637	692.859129304011	0.176453326658926	0.0916036862634082	1.92626884197139	0.0540708138247442	0.28834679554958	978.522166273419	879.557269815425	989.87719226216	1133.02328164372	1094.14237374916	985.982504025587
FBgn0039590	557.16732658924	0.4702610044973	0.244151865191645	1.92610039709577	0.0540918390644113	0.28834679554958	859.625183737159	626.322099824611	821.784838859151	1245.86030250557	1156.82761391187	791.836863289184
FBgn0038820	146.870384782829	-0.356253597037979	0.185059136817482	-1.92507975107082	0.0542193817709512	0.288824558693269	231.849115945707	287.064295752947	251.589208688163	159.367751114158	222.247669667799	221.880732270174
FBgn0035312	83.6843715474559	-2.67154246112732	1.38796667496752	-1.92478862015174	0.0542558082482016	0.288824558693269	0	0.966546450346621	3.2959284980982	0	0	0
FBgn0019968	1566.25228077524	0.410988047311854	0.213553201625613	1.924522995597	0.0542890611664232	0.288824558693269	2292.33382329909	1560.97251730979	2242.33002153948	2927.94620112653	2840.21124519053	2333.90795256689
FBgn0025739	62.484676812728	1.01039522163884	0.525064390550937	1.92432631087144	0.0543136946243608	0.288824558693269	3.5669094760878	8.69891805311959	1.0986428326994	9.30614605046176	7.97812147525431	11.0940366135087
FBgn0039411	11.1321498535386	0.818248150099223	0.425379475714188	1.92357223800098	0.054408223685695	NA	8.32278877753819	20.297475457279	9.8877854942946	24.4286333824621	13.6767796718645	31.8953552638375
FBgn0263987	1626.62829622244	0.450901774632784	0.234483576096697	1.92295674664583	0.0544854821466356	0.289488752773391	973.766286971969	735.541848713779	995.370406425657	1326.1258121908	1368.81769882577	999.850049792472
FBgn0020616	505.868297233534	0.261577411634054	0.136063809988774	1.92246131910929	0.0545477362694026	0.289488752773391	326.966701974715	252.268623540468	351.565706463808	426.919450064933	354.456539829156	330.047589251884
FBgn0030605	322.771009805239	-0.32583114964258	0.169499090363835	-1.92231798379079	0.0545657584712465	0.289488752773391	344.801249355154	379.852754986222	308.718635988532	254.755748131391	268.976666880002	302.312497718112
FBgn0025390	589.75456103688	0.492216999126307	0.256059581984061	1.9222752584082	0.0545711314888147	0.289488752773391	617.075339363189	635.02101787773	620.733200475161	932.941141558792	865.056314245431	836.213009743219
FBgn0035317	21.7620068704822	0.531588722930544	0.276555434859155	1.92217782015846	0.0545833866853703	NA	39.2360042369658	34.7956722124784	41.7484276425772	69.7960953784632	55.8468503267801	40.2158827239691
FBgn0085380	171.249452818712	0.598064691603589	0.311217583253188	1.92169312977744	0.0546443822399747	0.289555202533287	340.045370053703	192.342743618978	331.790135475219	511.838032775397	462.73104556475	331.434343828573
FBgn0039112	541.03302332577	-0.2851658762184	0.14841632107424	-1.92139162427935	0.0546823536821682	0.289555202533287	639.665766045078	655.318493335009	537.236345190007	483.919594624012	507.18057949831	513.099193374778
FBgn0039941	232.563430391714	0.24425625294599	0.127125040226429	1.9213858458643	0.0546830816275522	0.289555202533287	235.416025421795	304.462131859186	301.028136159636	352.470281661239	340.779760157291	303.699252294801
FBgn0026616	739.822631326442	0.491504457499119	0.255935009801092	1.92042682195416	0.0548040082802261	0.289954322972981	701.492196963934	485.206318074004	660.28434245234	964.3493844791	976.750014898992	653.161405620325
FBgn0038956	12.0112601691851	-0.786659837262614	0.409739773019878	-1.91990109103821	0.0548703940938617	NA	14.2676379043512	29.9629399607453	26.3674279847856	16.2857555883081	13.6767796718645	11.0940366135087
FBgn0035542	807.635753182445	0.249279726515193	0.129861133260016	1.91958687143188	0.0549101036674257	0.289954322972981	1199.67055379086	1014.87377286395	1132.70076051308	1343.57483603542	1437.2015971851	1193.99569052887
FBgn0045063	518.336025495694	0.292570284000179	0.152431361721282	1.91935754359486	0.0549391001478527	0.289954322972981	644.421645346529	521.935083187175	638.311485798352	841.042949310482	708.913079658311	657.321669350391
FBgn0036831	149.972561708319	-2.49641503356758	1.30079531519096	-1.91914516020617	0.0549659655382308	0.289954322972981	105.818314457271	44.4611367159446	96.6805692775472	0	42.1700706549156	1.38675457668859
FBgn0083983	78.2178350681774	-0.471119746893833	0.24548936648519	-1.91910449580412	0.0549711106220573	0.289954322972981	47.558793014504	70.5578908753034	58.2280701330682	30.2449746640007	39.8906073762715	59.6304467976093
FBgn0046776	133.223282260312	-0.660654218245637	0.344253893127095	-1.91909004207464	0.0549729394841387	0.289954322972981	5.944849126813	34.7956722124784	20.8742138212886	10.4694143067695	10.2575847538984	20.8013186503288
FBgn0259927	503.701531019453	0.671068873059222	0.349803480353953	1.91841679899866	0.0550581826375249	0.289954322972981	1023.7030196372	468.775028418111	936.043693459889	1548.31004914558	1392.75206325154	923.5785480746
FBgn0051660	180.283555719251	0.613634478460393	0.319920948146374	1.91808158239027	0.0551006674048669	0.289954322972981	380.470344116032	183.643825565858	324.099635646323	479.266521598781	512.87923769492	364.716453669099
FBgn0011280	3357.19237243765	-0.379268154329643	0.19776188221104	-1.91780210670179	0.055136108552342	0.289954322972981	7476.24226188002	8956.98595536214	8107.98410532158	6008.28054382938	6625.26001937904	6234.84857679189
FBgn0261885	1185.20225509724	0.43866279677393	0.228735301835703	1.91777479581623	0.0551395729463799	0.289954322972981	1526.63725576558	1050.63599152678	1485.36510980959	1950.80086582805	1878.27774160273	1675.19952863982
FBgn0017424	39.8838089107403	0.851649599475029	0.444114806231617	1.91763388098093	0.0551574509192249	0.289954322972981	71.338189521756	34.7956722124784	37.3538563117796	30.2449746640007	83.2004096705092	145.609230552302
FBgn0051814	110.665550076654	0.723105515043201	0.377084458658881	1.9176221624592	0.0551589378746291	0.289954322972981	224.715296993531	104.387016637435	184.571995893499	342.00086735447	304.308347698986	199.692659043157
FBgn0040832	119.705860808251	-0.350437624161119	0.182783995888179	-1.91722268931851	0.0552096467431147	0.289954322972981	174.778564328302	196.208929420364	166.993710570309	134.939117731696	125.370480325425	163.637040049253
FBgn0036258	1694.55176542176	-0.31964839940118	0.166733905573988	-1.91711696730655	0.055223073529477	0.289954322972981	1578.95192808153	1804.54222279714	1615.00496406812	1259.81952158126	1286.75702079459	1460.25256925308
FBgn0004435	338.671480697329	0.587840932736164	0.306795517666733	1.9160675397309	0.055356499389155	0.290480321419248	544.54818001607	361.488372429636	548.222773517001	800.328560339712	768.179124903058	615.719032049733
FBgn0029708	92.8710374334428	0.62565989999604	0.326804244255658	1.91447911400621	0.0555589653269614	0.291166977919882	200.935900486279	82.1564482794628	146.11949674902	258.245552900314	226.806596225087	174.731076662762
FBgn0026879	495.121578798662	-0.340303174718612	0.177755612729752	-1.91444404760365	0.0555634419570694	0.291166977919882	382.848283766757	449.444099411179	379.031777281293	330.368184791393	297.469957863053	330.047589251884
FBgn0010241	108.7650098197	0.4530722353227	0.236742802300561	1.91377406586366	0.0556490305843038	0.291166977919882	84.4168576007445	57.0262405704507	81.2995696197556	109.347216092926	105.99504245695	87.3655383313811
FBgn0051343	498.527120301576	0.748357482917445	0.391055590250083	1.91368567941674	0.0556603299464623	0.291166977919882	5.944849126813	11.5985574041595	8.7891426615952	22.1020968698467	9.11785311457635	13.8675457668859
FBgn0037801	1323.76011052583	0.439396430290998	0.22964118568168	1.91340429194645	0.0556963153740534	0.291166977919882	1930.88699638886	1552.27359925667	2234.63952171058	2958.19117579053	2379.75966290443	2414.33971801483
FBgn0052506	110.030470471253	0.645011687420437	0.337142276324631	1.91317355524812	0.0557258377542677	0.291166977919882	241.360874548608	116.952120491941	184.571995893499	300.123210127392	317.98512737085	228.814505153617
FBgn0265194	803.113030782307	0.350262292541931	0.183083629116603	1.91312731909446	0.0557317551615194	0.291166977919882	1064.12799369953	866.992165960919	1134.89804617848	1423.84034572065	1270.80077784408	1212.02350002583
FBgn0086680	269.367548748954	0.351601497889402	0.183800303211726	1.91295385124789	0.0557539606340807	0.291166977919882	467.265141367502	391.451312390382	442.753061577858	593.266810716937	560.747966546446	504.778665914646
FBgn0026085	35.4098442578461	-2.52065556658889	1.31780605243498	-1.91276672461121	0.0557779228199694	NA	2.3779396507252	0.966546450346621	4.3945713307976	0	1.13973163932204	0
FBgn0266095	111.680774550389	-0.291863578117285	0.152604469400107	-1.9125493457997	0.0558057696678948	0.291254066031532	230.660146120344	312.194503461959	248.293280190064	214.041359160621	226.806596225087	206.6264319266
FBgn0085426	139.571226579612	0.374436018249729	0.195803681499138	1.91230325897308	0.0558373080694537	0.291254066031532	269.89615035731	178.811093314125	236.208209030371	336.184526072931	305.448079338308	242.682050920503
FBgn0038769	76.5806863316757	-0.479937771121715	0.251019381092288	-1.91195504121359	0.0558819609021332	0.291308389120288	40.4249740623284	62.8255192725304	52.7348559695712	36.0613159455393	33.0522175403393	44.3761464540348
FBgn0010591	611.001799439986	0.189786085981927	0.0992759695381195	1.91170216584038	0.0559144063814494	0.291308389120288	560.004787745784	510.336525783016	571.294273003688	659.573101326477	637.109986381023	571.342885595698
FBgn0263994	250.046495564703	0.849694503546455	0.444554773960388	1.9113381596981	0.0559611381750206	0.2913781074107	496.989387001567	196.208929420364	409.793776596876	801.491828596019	747.663955395261	436.827691656905
FBgn0035397	1077.82607797851	0.354000659878748	0.185296051724661	1.910459810578	0.0560740362491248	0.291792051643004	961.876588718343	792.568089284229	953.621978783079	1248.18683901818	1228.63070718916	981.822240295521
FBgn0262952	8231.33523221903	-1.02010109120568	0.534035358301328	-1.91017518849397	0.0561106606409286	0.291808834535591	9618.76588718343	21405.1376893763	13510.0109137045	9033.94127848576	4302.48693844072	8622.83995784964
FBgn0051665	508.426208492088	0.719198125367798	0.376886903892049	1.90825979343075	0.0563576468539805	0.292918953339219	961.876588718343	477.473946471231	920.662693802097	1505.26912366219	1433.78240226713	944.379866724929
FBgn0031412	34.9721100273593	-2.24572960725465	1.17703576444304	-1.90795358569015	0.0563972154926127	NA	0	5.79927870207973	5.493214163497	0	0	2.77350915337718
FBgn0036556	565.079280774503	0.336913926042506	0.176600783607277	1.9077714105263	0.0564207674199682	0.293072678328337	720.515714169735	601.191892115598	709.723269923813	917.818654226791	939.138870801364	705.858079534492
FBgn0262987	24.3386797976342	-2.51213797312897	1.31715221679772	-1.90724955027332	0.0564882797601261	NA	2.3779396507252	4.83273225173311	0	0	0	1.38675457668859
FBgn0011591	444.327425398059	0.195117865553667	0.102309845306456	1.90712697267028	0.056504147203766	0.293331392821927	691.980438361033	637.92065722877	740.485269239396	770.083585675711	824.025975229838	773.809053792232
FBgn0039184	103.708116070845	-2.51275883224037	1.31846981100627	-1.90581446102479	0.0566742820620432	0.293881197090504	1.1889698253626	3.86618580138648	2.1972856653988	0	0	1.38675457668859
FBgn0003137	5300.23624910591	0.406169921849609	0.213124064392339	1.90579099083758	0.0566773282702873	0.293881197090504	10064.6295716944	7694.67629120945	8847.37073172827	11722.2542188129	12260.0932441872	11274.3147084782
FBgn0002626	8283.51717903104	-0.335647078218122	0.176147838253426	-1.90548508313353	0.0567170446595117	0.293912704145999	7793.69720525184	9351.33690710356	6689.63620830665	5881.48430389183	6388.19583840006	6618.97959453463
FBgn0041096	195.58841148473	0.296986587297716	0.155889841855661	1.90510544986438	0.056766365136149	0.293993913571152	299.620395991375	234.870787434229	306.521350323133	344.327403867085	335.081101960681	352.235662478902
FBgn0267661	17.2485572951626	1.00781150679536	0.52902364806702	1.90504056005391	0.0567747989381489	NA	4.7558793014504	4.83273225173311	4.3945713307976	10.4694143067695	5.69865819661022	12.4807911901973
FBgn0041789	586.533522498457	0.224668831452328	0.117975167466372	1.9043739142508	0.0568615040412573	0.294257533013033	624.209158315365	560.59694120104	619.634557642462	756.124366600018	658.764887528141	691.990533767606
FBgn0040959	178.093690825893	-2.31165146922117	1.2139775131153	-1.90419628390729	0.0568846255303894	0.294257533013033	1.1889698253626	0.966546450346621	16.479642490491	0	1.13973163932204	2.77350915337718
FBgn0052023	81.1393051321158	-2.52169906991903	1.32458071765436	-1.90377153789812	0.0569399448753274	0.29436940732292	2.3779396507252	0.966546450346621	4.3945713307976	1.16326825630772	0	0
FBgn0039632	252.731883581298	0.342334192162506	0.17984914779206	1.90345184486673	0.0569816115308518	0.294410609074543	197.368991010191	189.443104267938	202.15028121669	237.306724286775	254.160155568816	255.1628421107
FBgn0034085	124.038735192745	0.42057145899589	0.221081534726472	1.90233643671884	0.0571271850720229	0.294716606927713	46.3698231891414	38.6618580138649	31.8606421482826	65.1430223532323	46.7289972122038	42.9893918773463
FBgn0003308	1975.85122489801	0.343932284278715	0.18081863940069	1.90208423986959	0.0571601424944573	0.294716606927713	3310.09199380948	2674.4340281091	3406.89142420084	4308.7456213638	4065.42275746173	3543.15794343934
FBgn0036745	274.171602280536	-0.339413961839647	0.17845636552827	-1.90194370951637	0.0571785140499648	0.294716606927713	318.643913197177	383.718940787609	297.732207661538	237.306724286775	237.064180978985	318.953552638375
FBgn0037135	3171.55459530746	-0.229054531905472	0.120435165382518	-1.90189079060061	0.0571854334210744	0.294716606927713	3817.78210923931	4540.83522372843	3779.33134448594	3250.17150812377	3328.01638682037	3781.67973062978
FBgn0035636	50.4092545071322	-0.45568034364231	0.239616508012893	-1.90170680401448	0.0572094958623557	0.294716606927713	124.841831663073	124.684492094714	98.877854942946	89.5716557356945	87.7593362277974	76.2715017178724
FBgn0043458	735.271022254779	0.207168946013184	0.109000232539712	1.90062847744573	0.0573506927411573	0.295269889498817	720.515714169735	649.519214632929	704.230055760316	836.389876285251	842.26168145899	711.405097841246
FBgn0003502	885.629025094408	0.341781485779963	0.179860867828424	1.90025484646277	0.0573996838113748	0.29534807859834	620.642248839277	571.228952154853	767.951340056881	913.16558120156	822.886243590516	746.073962258461
FBgn0085256	269.730283017978	-0.646779849096817	0.340415400669877	-1.8999723509103	0.0574367481624088	0.295364843257778	454.186473288513	728.776023561352	760.260840227985	240.796529055698	366.993587861698	635.133596123374
FBgn0010408	10985.2264699585	-0.36576161767552	0.19258346481547	-1.89923687387173	0.0575333385457752	0.295533832981017	9619.95485700879	11991.9418094505	8416.70274131011	7263.4469923854	7902.89918705905	8138.86261058533
FBgn0037433	216.130390358684	-0.349171877445081	0.183851403400746	-1.89920702799304	0.0575372610622306	0.295533832981017	443.48574486025	519.035443836136	377.933134448594	309.429356177854	337.360565239325	407.705845546445
FBgn0063498	77.231407583793	-0.470554054287752	0.247799364004234	-1.89893164649007	0.0575734637694672	0.295546035813064	121.274922186985	195.242382970018	132.935782756627	94.2247287609253	91.1785311457635	141.448966822236
FBgn0263047	17.7937630838997	-0.912146803010689	0.480434547554742	-1.8985870347027	0.0576187944316534	NA	13.0786680789886	10.6320109538128	15.3809996577916	3.48980476892316	12.5370480325425	4.16026373006577
FBgn0035088	154.024143897126	-0.389021094157769	0.205023766326702	-1.89744389700593	0.0577693766988744	0.296377594960696	154.566077297138	174.944907512738	124.146640095032	100.041070042464	117.392358850171	130.354930208727
FBgn0000100	12172.2984252034	-0.247754170553775	0.130590530009899	-1.89718328377254	0.0578037522871203	0.296379920030851	12034.7525723202	13595.4423705756	10638.1585490283	10028.5356376289	10160.707564556	10357.6699332871
FBgn0013674	108241.939692958	-0.500040208929684	0.263607091888213	-1.89691485668274	0.0578391763169435	0.296387614944947	125820.353829346	229223.256524854	167039.853569282	119424.608997319	102953.0987116	146782.42492418
FBgn0010412	7071.94109112599	-0.24815429165894	0.130844681003012	-1.89655620508738	0.0578865353349181	0.296456423928007	7074.37046090747	8089.02724295087	6468.80899893407	5880.32103563553	6039.43795676751	6295.86577816619
FBgn0050054	151.128979718548	0.268330706813927	0.141531899196485	1.89590267874107	0.0579729146720214	0.296724871405654	227.093236644256	212.640219076257	198.854352718591	243.123065568314	288.352104748477	235.74827803706
FBgn0038319	215.344026110604	-0.308746686496228	0.162891781496605	-1.89540984609259	0.0580381252700363	0.296884719253107	152.188137646413	168.179082360312	159.303210741413	127.959508193849	121.951285407459	138.675457668859
FBgn0030615	194.665212903841	0.356589687804899	0.18822135548909	1.89452300392963	0.0581556239240096	0.297190461479775	93.9286162036453	91.821912782929	126.343925760431	112.837020861849	129.929406882713	158.090021742499
FBgn0045852	45.7314339414374	0.478815872375726	0.25274767964895	1.89444220829552	0.0581663384394615	0.297190461479775	58.2595214427674	56.059694120104	74.7077126235592	96.5512652735408	83.2004096705092	83.2052746013153
FBgn0051368	280.079262916276	0.313703729509515	0.165613751031174	1.89418890373701	0.0581999404362934	0.297190461479775	242.54984437397	178.811093314125	198.854352718591	265.22516243816	290.631568027121	210.786695656665
FBgn0262111	19.2232694821473	0.718468590457009	0.379306269639813	1.89416481604499	0.0582031366173095	NA	26.1573361579772	16.4312896558926	19.7755709885892	34.8980476892316	28.4932909830511	38.8291281472805
FBgn0046222	445.942044424826	-0.221180415182254	0.116800542485899	-1.89365914296979	0.0582702677389238	0.297243011708498	263.951301230497	301.562492508146	260.378351349758	245.449602080929	231.365522782375	232.974768883683
FBgn0029897	8084.3046596461	-0.290112970968791	0.153207194977578	-1.89359886793339	0.0582782738991252	0.297243011708498	7817.47660175909	8801.37197685633	6641.29592366788	6126.93390597276	6558.01585265904	6338.85517004354
FBgn0015778	1011.11613611876	0.46771598842445	0.247036751138415	1.89330529271083	0.0583172817202525	0.29726843079921	699.114257313208	398.217137542808	603.154915151971	864.308314436636	854.798729491533	629.586577816619
FBgn0052448	55.3931467098291	-0.500970595626612	0.264671861258075	-1.89279885381592	0.0583846240677497	0.29735813811929	71.338189521756	108.253202438822	78.0036411216574	51.1838032775397	71.8030932772888	59.6304467976093
FBgn0036462	335.019201466397	-0.277928186351642	0.146850766701218	-1.89258927682083	0.0584125108948341	0.29735813811929	172.400624677577	189.443104267938	175.782853231904	134.939117731696	136.767796718645	174.731076662762
FBgn0011741	209.075210183967	-0.3198701190284	0.16902832458929	-1.89240542853176	0.058436983306721	0.29735813811929	161.699896249313	193.309290069324	125.245282927732	126.796239937542	139.047259997289	119.260893595219
FBgn0031143	461.003398387704	-0.217634550359577	0.115040929801017	-1.89180103756127	0.0585174950179567	0.297521338500565	345.990219180516	389.518219489688	338.381992471415	323.388575253546	296.330226223731	305.086006871489
FBgn0034735	182.475048960532	-0.275454912928735	0.145615944862314	-1.8916535080632	0.0585371615980853	0.297521338500565	170.022685026852	169.145628810659	153.809996577916	140.755459013234	120.811553768137	146.99598512899
FBgn0038173	32.0793486895696	-0.507877292708389	0.268490788054537	-1.89160043958464	0.0585442372916673	NA	66.5823102203056	65.7251586235703	54.93214163497	41.8776572270779	46.7289972122038	42.9893918773463
FBgn0027780	181.096473882436	0.285906127033715	0.151172745181322	1.8912544499393	0.0585903859836895	0.297618722290404	130.786680789886	115.019027591248	125.245282927732	179.143311471389	140.186991636611	130.354930208727
FBgn0087035	2406.5185901452	0.181908984181938	0.0962009942750249	1.89092623785038	0.0586341913937241	0.297626618673159	2618.11155544844	2669.60129585737	3033.35286108304	3187.35502228315	3154.77717764342	3096.62296974562
FBgn0000278	43.8394057659881	-2.05060991602382	1.08460285734141	-1.89065509291603	0.0586704007474657	0.297626618673159	19.0235172058016	83.1229947298094	41.7484276425772	3.48980476892316	7.97812147525431	23.574827803706
FBgn0053147	485.8209331191	0.710288463449305	0.375751685830769	1.89031344431334	0.0587160517700013	0.297626618673159	996.356713653858	475.540853570538	897.59119431541	1528.53448878834	1349.4422609573	997.076540639095
FBgn0000078	2402.25257909617	-0.218549921079484	0.115625950552989	-1.89014594071879	0.058738444342436	0.297626618673159	1290.03226051842	1433.38838586404	1540.29725144456	1213.28879132895	1255.98426653289	1195.38244510556
FBgn0029134	1490.67174625595	-0.282888264885608	0.149697610178728	-1.88973133604378	0.0587939009080746	0.297626618673159	929.774403433553	1131.82589335589	942.635550456086	810.797974646481	706.633616379667	955.473903338438
FBgn0031258	273.532598321549	0.363151241808649	0.192172678096057	1.88971317570508	0.058796330986594	0.297626618673159	416.13943887691	323.793060866118	489.994703383933	582.797396410168	518.57789589153	478.430328957563
FBgn0038723	341.517636273845	-0.273867814361592	0.145000301544425	-1.88873961946683	0.0589267270095761	0.298113962873576	225.904266818894	234.870787434229	226.320423536076	183.79638449662	206.29142671729	177.504585816139
FBgn0025833	120.805113818126	0.629853912287409	0.33377875254324	1.8870401650441	0.059154923574412	0.299028976214085	278.218939134848	121.784852743674	203.248924049389	381.551988068932	324.823517206783	224.654241423551
FBgn0033028	1225.32166495381	0.219581061096569	0.116372368624501	1.88688314667798	0.0591760443944321	0.299028976214085	1191.34776501332	1065.13418828198	1182.13968798455	1335.43195824126	1259.40346145086	1408.94264991561
FBgn0013973	376.500468742449	0.569632447286148	0.302129104167439	1.88539415577276	0.0593766424740881	0.29970480527913	741.917171026262	426.24698460286	678.961270608229	1065.55372277787	1038.29552342238	635.133596123374
FBgn0031633	377.342591193853	-0.267987263811191	0.142146126276083	-1.88529417460658	0.0593901322110035	0.29970480527913	250.872633151508	277.39883124948	236.208209030371	204.735213110159	199.453036881358	232.974768883683
[truncated: 7,832 more rows]
